# Supplementary material for: Targeting RNA:protein interactions with an integrative approach leads to the identification of potent YBX1 inhibitors
Source: eLife journal article supplement (doi:10.7554/elife.80387), 2023-01-18
Supplement: supp [file elife-80387-supp-v1.zip]

Archive with 25 entries (25 files):
- elife_poa_e80387_Figure_1_figure_supplement_1.pdf
- elife_poa_e80387_Figure_1_figure_supplement_2.pdf
- elife_poa_e80387_Figure_3_figure_supplement_1.pdf
- elife_poa_e80387_Figure_3_figure_supplement_2.pdf
- elife_poa_e80387_Figure_3_figure_supplement_3.pdf
- elife_poa_e80387_Figure_3_figure_supplement_4.pdf
- elife_poa_e80387_Figure_5_figure_supplement_1.pdf
- elife_poa_e80387_Figure_6_figure_supplement_1.pdf
- elife_poa_e80387_Figure_6_figure_supplement_2.pdf
- elife_poa_e80387_Figure_6_figure_supplement_3.pdf
- elife_poa_e80387_Figure_7_figure_supplement_1.pdf
- elife_poa_e80387_Figure_7_figure_supplement_2.pdf
- elife_poa_e80387_Figure_8_Figure_supplement_1.pdf
- elife_poa_e80387_Figure_8_figure_supplement_2.pdf
- elife_poa_e80387_Figure_8_figure_supplement_3.pdf
- elife_poa_e80387_Figure_8_figure_supplement_4.pdf
- elife_poa_e80387_Figure_8_figure_supplement_5.pdf
- elife_poa_e80387_Figure_2_source_data_1.docx
- elife_poa_e80387_Figure_3_source_data_1.xlsx
- elife_poa_e80387_Figure_4_source_data_1.xlsx
- elife_poa_e80387_Figure_7_source_data_1.xlsx
- elife_poa_e80387_Figure_8_source_data_1.xlsx
- elife_poa_e80387_Figure_8_source_data_2.xlsx
- elife_poa_e80387_Figure_8_source_data_3.xlsx
- elife_poa_e80387_Appendix_5_table_1_source_data_1.xlsx
