# Supplementary material for: Targeting RNA:protein interactions with an integrative approach leads to the identification of potent YBX1 inhibitors
Source: eLife journal article supplement (doi:10.7554/elife.80387), 2023-01-18
Supplement: supp [file elife-80387-supp-v1.zip › elife_poa_e80387_Appendix_5_table_1_source_data_1.xlsx]

## Sheet: Appendix 5 Table 1 and Figure 1
Data ITC YB-1 +P1
	Injection #	ΔQ (µcal)	V injection (µL)	Conc. P1 (mM)	Conc. YB-1 (mM)	Molar ratio (P1/YB-1)	ΔH (µcal/mol)	Fit (cal/mol)	Residual (cal/mol)
	1	-11.3545	0.4	0	0.015	0.0254331	-141931	-197413	55482.1
	2	-59.1311	1.5	0.000380771	0.0149714	0.12125	-197091	-196102	-988.508
	3	-58.7712	1.5	0.00180229	0.0148648	0.21774	-195891	-193892	-1998.69
	4	-57.711	1.5	0.00321359	0.014759	0.31491	-192357	-191490	-866.906
	5	-56.5366	1.5	0.00461467	0.0146539	0.41277	-188443	-188896	452.98
	6	-55.6035	1.5	0.00600554	0.0145495	0.5113	-185333	-186113	780.274
	7	-54.4938	1.5	0.0073862	0.0144458	0.61052	-181634	-183154	1519.9
	8	-53.5959	1.5	0.00875664	0.0143429	0.71042	-178641	-180037	1395.84
	9	-52.7685	1.5	0.0101169	0.0142407	0.811	-175883	-176789	905.831
	10	-51.9985	1.5	0.0114669	0.0141392	0.91226	-173317	-173444	127.239
	11	-50.8631	1.5	0.0128067	0.0140384	1.0142	-169532	-170041	509.029
	12	-49.9244	1.5	0.0141362	0.0139384	1.11682	-166403	-166625	221.9
	13	-49.1426	1.5	0.0154556	0.0138389	1.22012	-163798	-163240	-557.446
	14	-48.3054	1.5	0.0167648	0.0137402	1.32411	-161007	-159929	-1078.39
	15	-47.1856	1.5	0.0180637	0.0136422	1.42877	-157275	-156730	-544.384
	16	-46.4063	1.5	0.0193524	0.0135448	1.53412	-154677	-153677	-1000.68
	17	-45.5837	1.5	0.0206309	0.0134481	1.64015	-151936	-150792	-1143.11
	18	-44.5114	1.5	0.0218992	0.013352	1.74685	-148361	-148094	-267.239
	19	-43.7228	1.5	0.0231573	0.0132566	1.85424	-145733	-145591	-141.92
	20	-42.867	1.5	0.0244051	0.0131618	1.96231	-142880	-143285	404.524
	21	-42.2917	1.5	0.0256428	0.0130676	2.07106	-140963	-141173	210.434
	22	-41.6793	1.5	0.0268702	0.0129741	2.1805	-138922	-139248	326.639
	23	-40.9579	1.5	0.0280874	0.0128812	2.29061	-136517	-137500	982.959
	24	-40.3935	1.5	0.0292944	0.0127889	2.4014	-134636	-135917	1280.72
	25	-40.4458	1.5	0.0304912	0.0126972	2.51288	-134810	-134485	-324.928
	26	-40.0626	1.5	0.0316778	0.0126062	2.62503	-133533	-133193	-340.353
