# Supplementary material for: Targeting RNA:protein interactions with an integrative approach leads to the identification of potent YBX1 inhibitors
Source: eLife journal article supplement (doi:10.7554/elife.80387), 2023-01-18

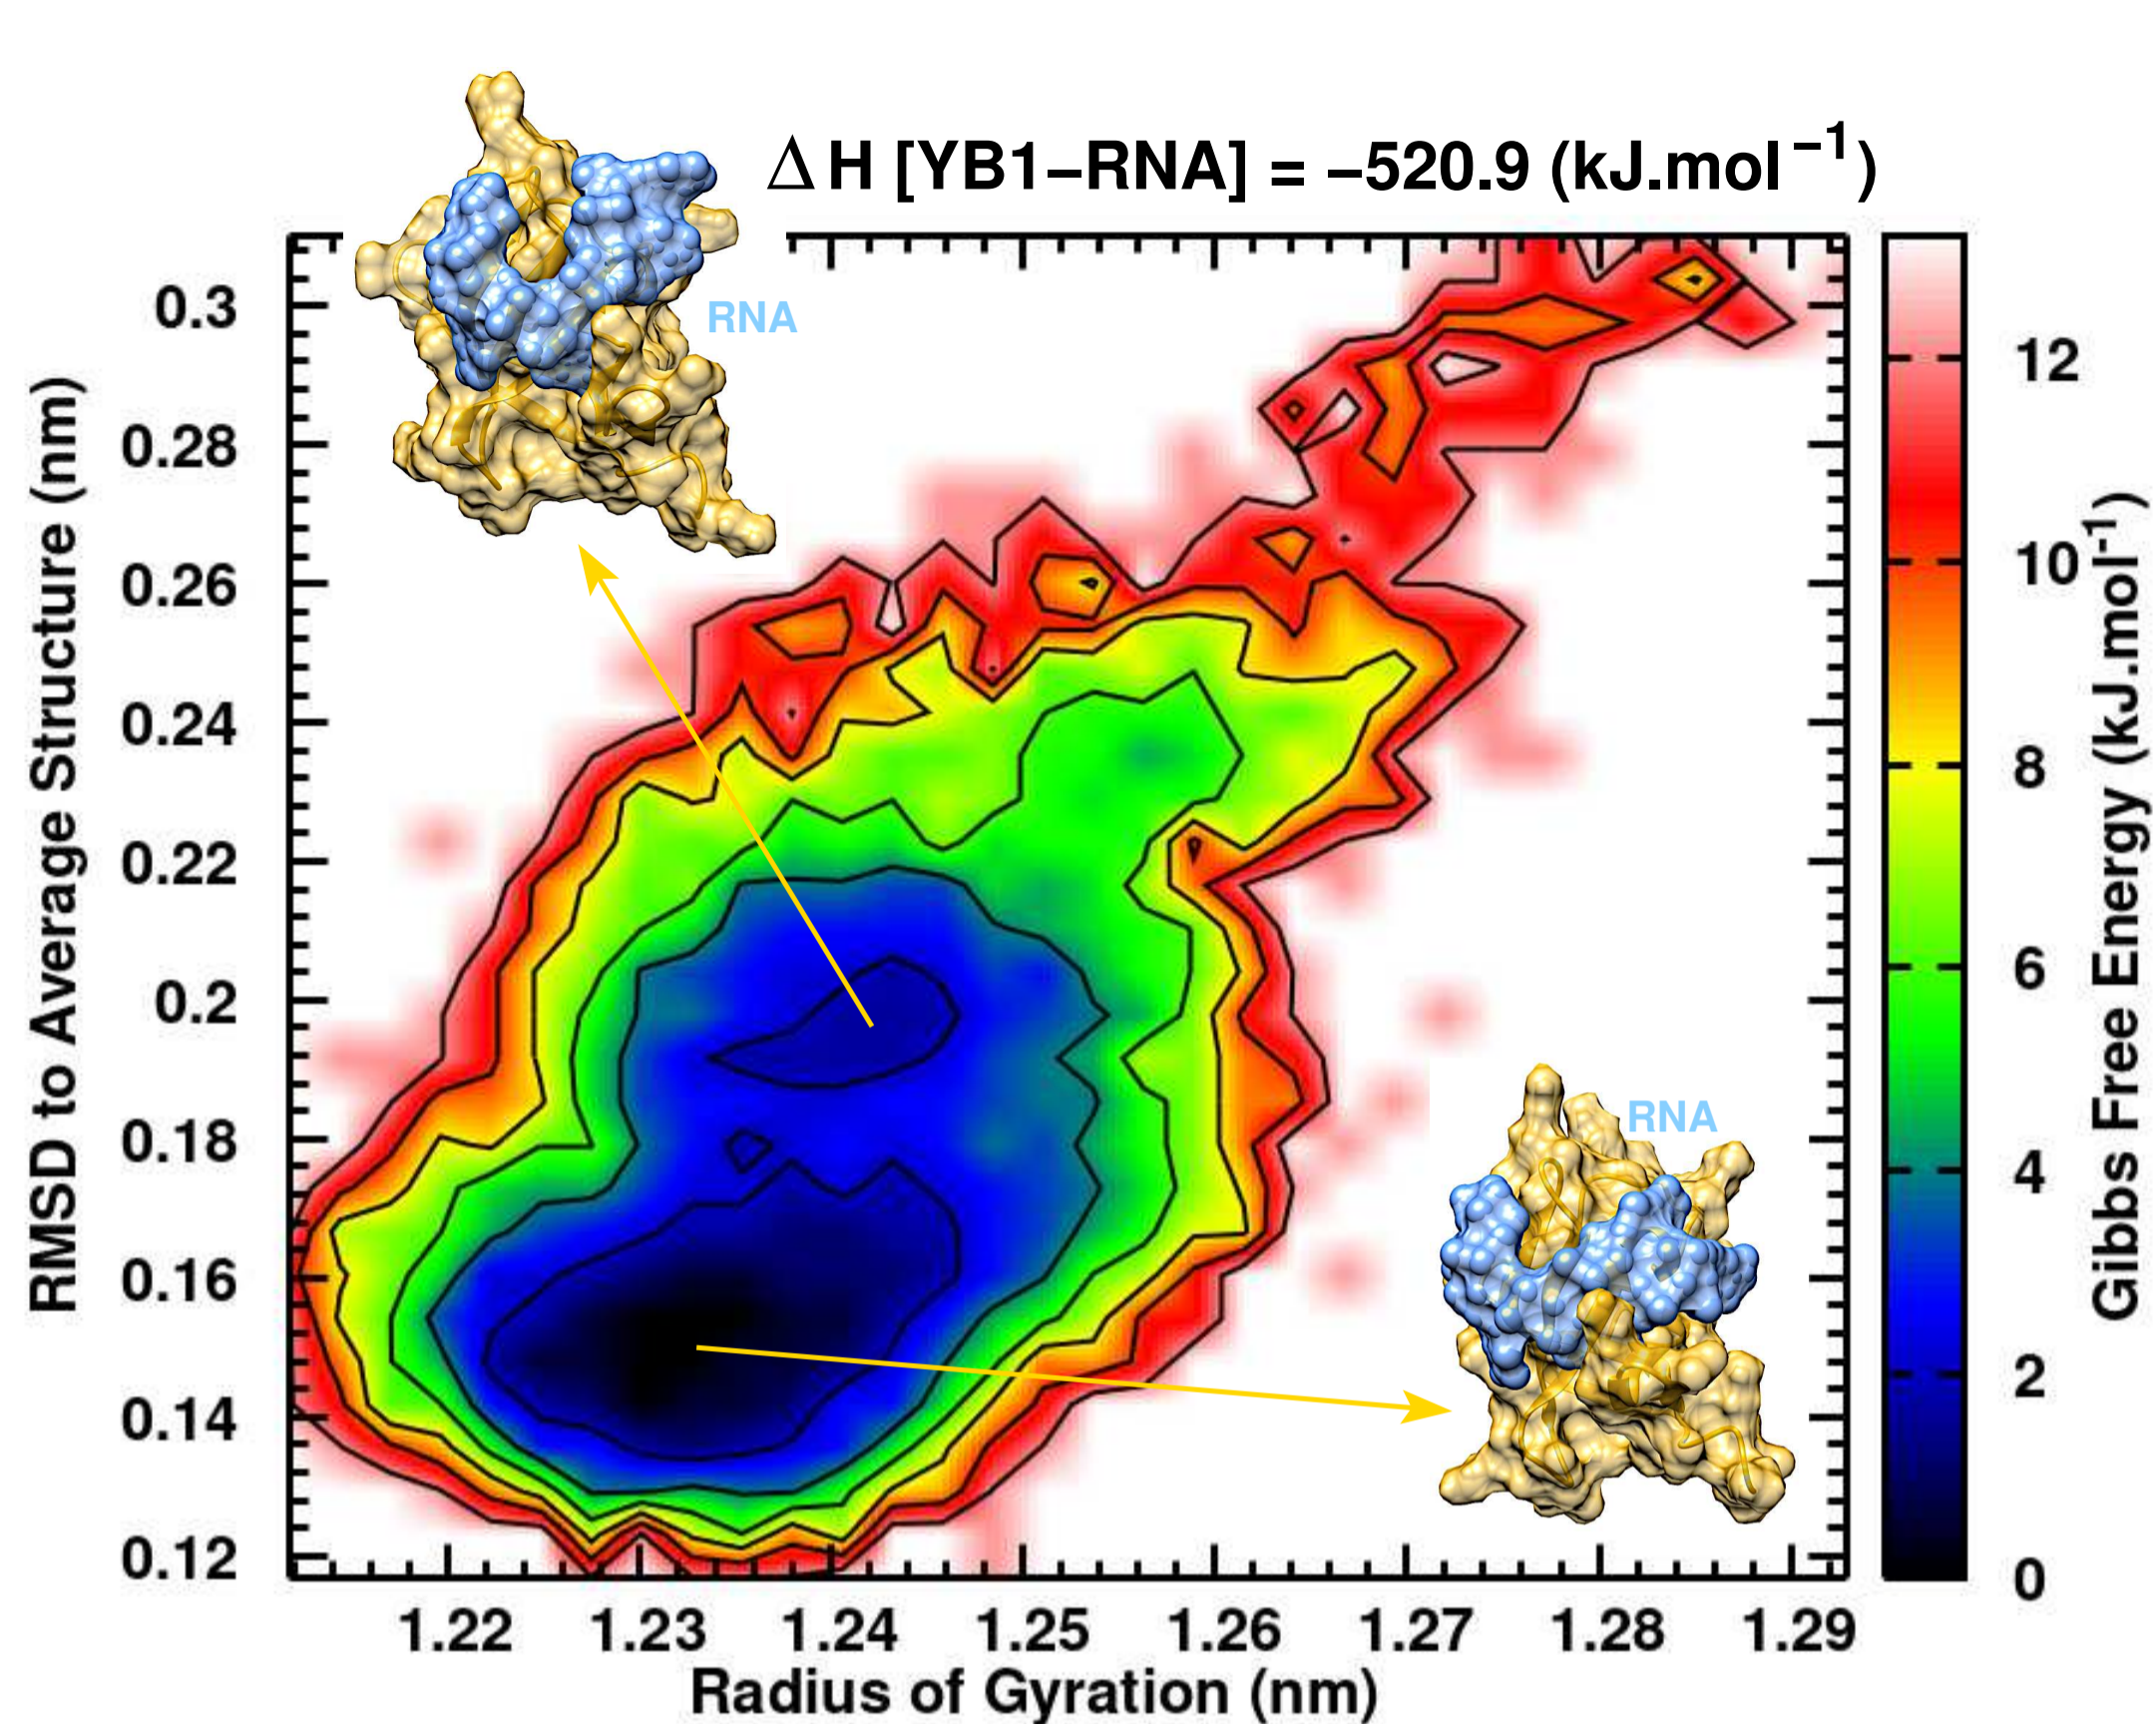

| Residue     | $\Delta H \text{ (kJ.mol}^{-1}\text{)}$ |              |              |
|-------------|-----------------------------------------|--------------|--------------|
|             | Coul                                    | LJ           | Total        |
| <b>K64</b>  | <b>-38.4</b>                            | -3.3         | <b>-41.7</b> |
| <b>W65</b>  | <b>-28.0</b>                            | <b>-38.4</b> | <b>-66.4</b> |
| N67         | -19.1                                   | -6.6         | -25.7        |
| R69         | -6.1                                    | -4.6         | -10.7        |
| N70         | -6.9                                    | -18.0        | -24.8        |
| <b>Y72</b>  | -6.4                                    | <b>-33.4</b> | <b>-39.8</b> |
| <b>F74</b>  | -3.3                                    | <b>-31.8</b> | <b>-35.1</b> |
| D83         | -22.6                                   | -3.1         | -25.6        |
| <b>F85</b>  | -3.0                                    | <b>-35.9</b> | <b>-38.9</b> |
| <b>H87</b>  | <b>-12.0</b>                            | <b>-23.8</b> | <b>-35.8</b> |
| Q88         | -4.8                                    | -2.2         | -7.0         |
| E117        | 0.9                                     | -4.0         | -3.0         |
| <b>K118</b> | <b>-62.0</b>                            | <b>-26.1</b> | <b>-88.1</b> |
| G119        | -7.6                                    | -5.8         | -13.4        |
| A120        | -1.6                                    | -4.9         | -6.4         |
| <b>E121</b> | <b>-35.8</b>                            | -4.5         | <b>-40.3</b> |
| Total       | -256.9                                  | -251.7       | -508.6       |

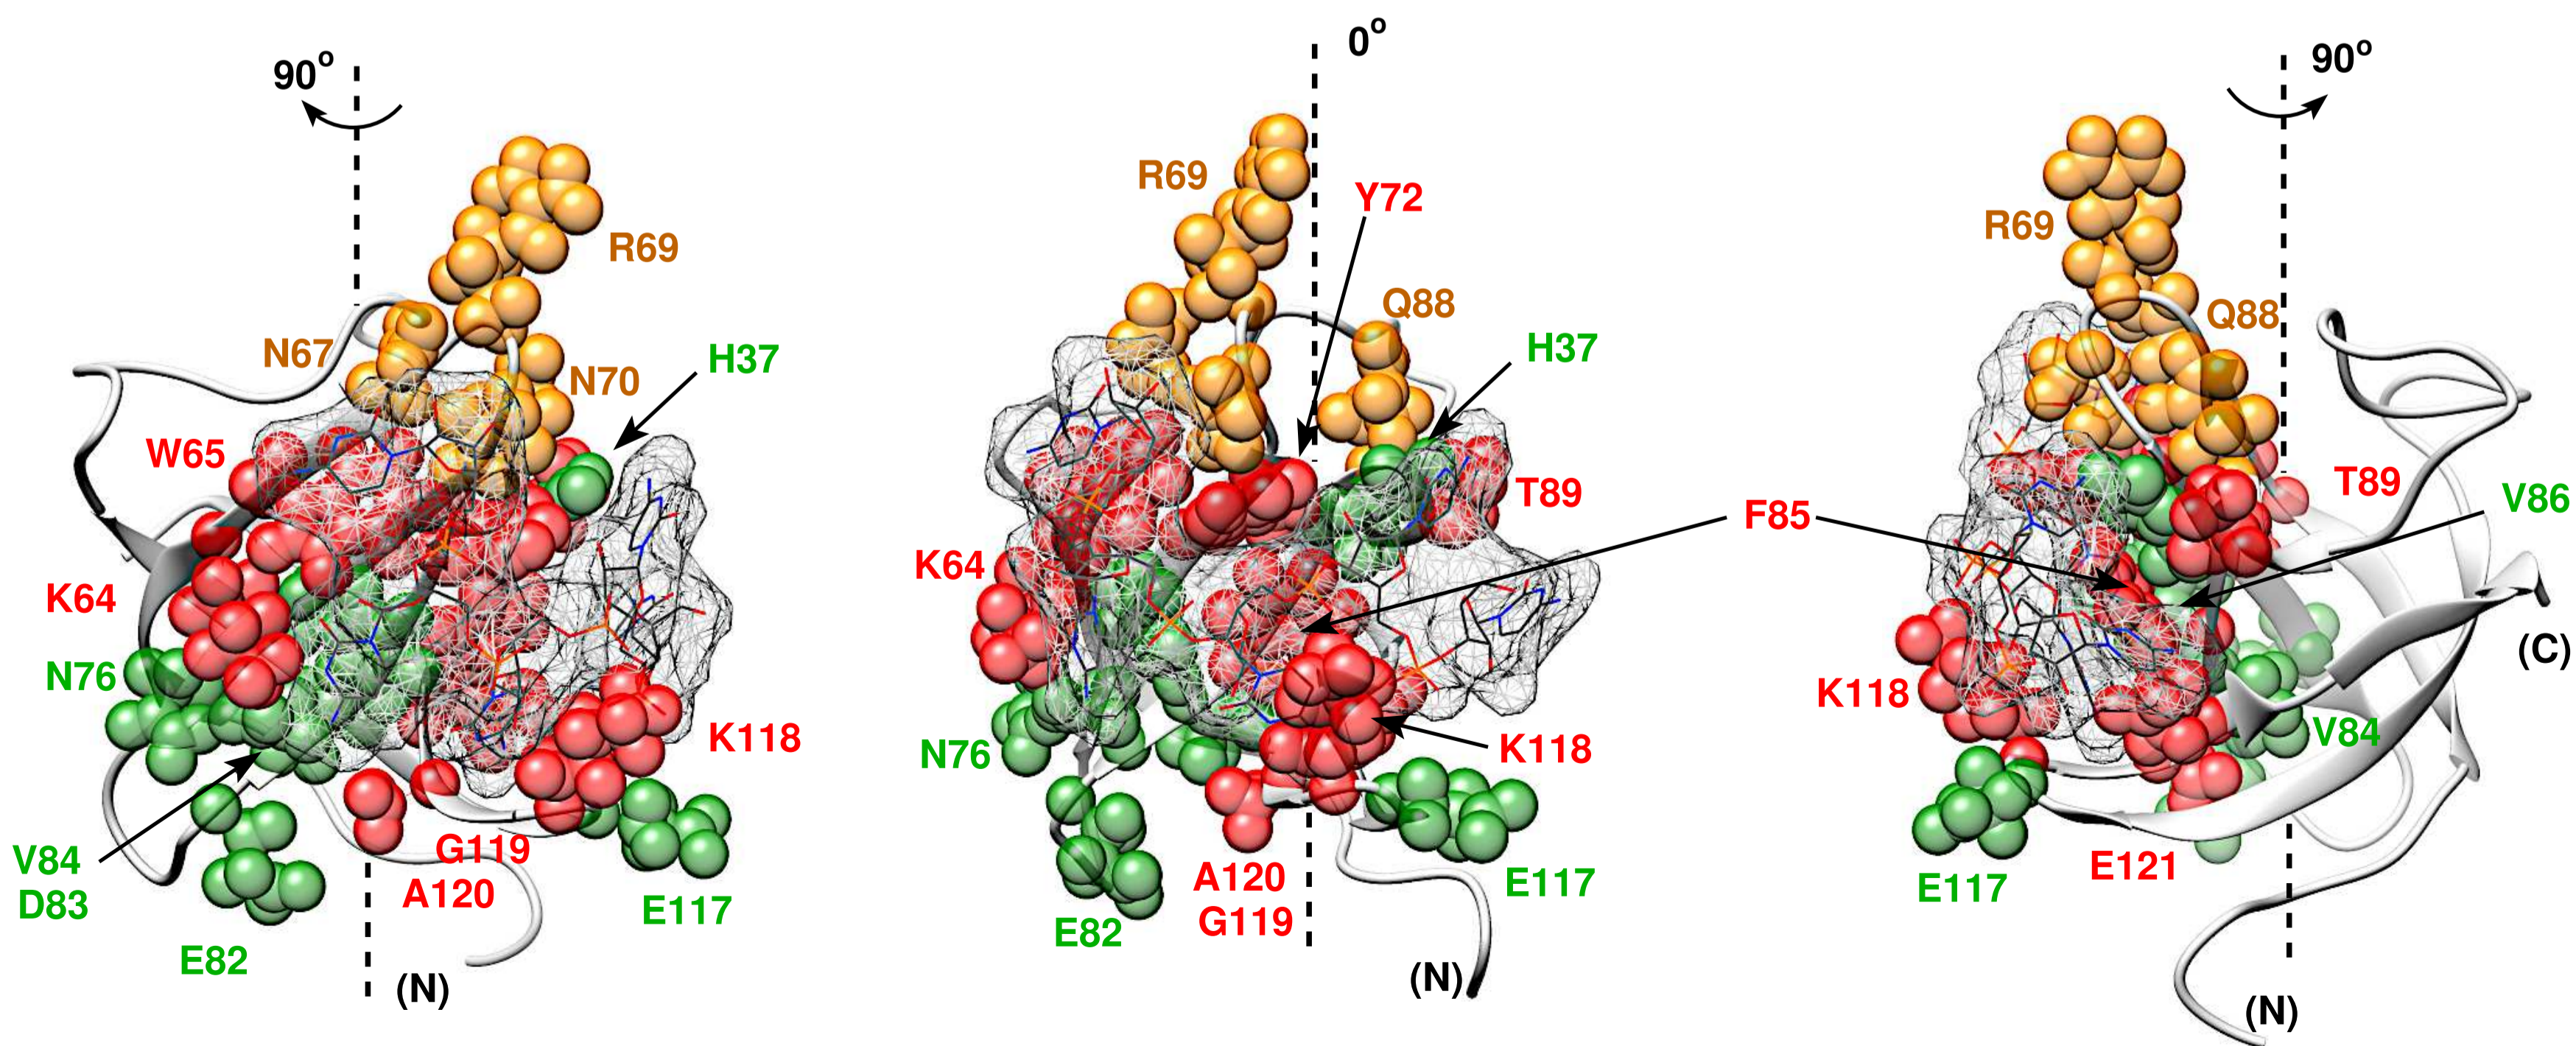

Supplement: supp [file elife-80387-supp-v1.zip › elife_poa_e80387_Figure_1_figure_supplement_2.pdf]
