# Supplementary material for: Targeting RNA:protein interactions with an integrative approach leads to the identification of potent YBX1 inhibitors
Source: eLife journal article supplement (doi:10.7554/elife.80387), 2023-01-18
Supplement: supp [file elife-80387-supp-v1.zip › elife_poa_e80387_Figure_3_source_data_1.xlsx]

## Sheet: Feuil1
Bait	YB-1	TOP1	APE1	LIG1
Slope of mRNA enrichment on MTs versus bait fluorescence in selected spots.	2.17297	-0.433439	-0.833869	-0.283227
	2.38639	0.168108	-0.283227	-0.209539
	2.43374	0.45423	-2.39338	0.283717
