# Supplementary material for: Targeting RNA:protein interactions with an integrative approach leads to the identification of potent YBX1 inhibitors
Source: eLife journal article supplement (doi:10.7554/elife.80387), 2023-01-18
Supplement: supp [file elife-80387-supp-v1.zip › elife_poa_e80387_Figure_4_source_data_1.xlsx]

## Sheet: Figure 4d
				YB-1						FUS					HuR
	Treatment	Slope values						Slope values						Slope values
	pos. control	1.03812	0.966215	1.06513	0.930534			0.912194	0.99994	1.06047	1.02739			1.07872	1.04604	0.953909	0.921326
	F11	0.894216	0.973933	1.00218	0.99286			0.866958	1.15189	0.964039	0.838954			0.895482	1.01265	0.942721	1.00552
	F5	0.870914	1.09038	0.919739	0.937915			1.10496	0.665483	0.871748	0.957352			0.968199	0.972215	0.875924	0.88768
	A3	0.794305	0.8827	0.957919	1.08377			1.03365	1.07819	0.890799	1.04385			0.929243	0.835301	0.818315	0.908632
	D4	0.787466	0.990357	0.96291	0.886518			0.935285	1.06784	1.02676	0.9806			1.03829	0.824139	0.971547	1.03741
	P2	1.06882	0.817579	0.872844	0.865625			0.914127	1.00009	0.952709	0.991733			0.884849	1.03903	1.01398	0.970509
	F2	0.863704	0.837175	0.844814	0.812492			0.933658	0.838175	0.828499	1.25164			0.948103	0.907054	0.962221	0.936978
	C12	0.87733	0.713826	0.931947	0.622711			1.0963	1.21048	1.01315	0.766492			0.95324	0.993014	0.923192	0.8744
	C3	0.733902	0.705547	0.773193	0.782088			0.998123	1.04722	1.06843	0.903335			0.969724	0.913136	0.861165	0.865182
	P1	NaN	0.622741	0.797112	0.776361			1.06642	1.05447	0.804184	0.941937			0.854888	0.945457	1.03482	0.996671
	C8	0.649643	0.773101	0.624072	0.725896			1.18235	0.57736	1.47567	0.959802			0.939343	0.879203	1.02609	0.975916
	neg.control	-0.273849	0.141004	0.119074	0.162985			-0.308938	0.0439535	-0.221362	0.0720052			-0.111505	-0.0186592	-0.035303	-0.0316445
