# Supplementary material for: Targeting RNA:protein interactions with an integrative approach leads to the identification of potent YBX1 inhibitors
Source: eLife journal article supplement (doi:10.7554/elife.80387), 2023-01-18
Supplement: supp [file elife-80387-supp-v1.zip › elife_poa_e80387_Figure_7_source_data_1.xlsx]

## Sheet: Figure 7b
		Dose response, MT bench
			P2
		Concentrations	DMSO/CRTL	50	25	12.5	6.25	3.12	1.56	0.78	0.39	0.19	0.09	GFP Alone
		Slope values	1.00752	0.883193	1.00751	0.856893	0.905726	0.945816	1.11552	0.874688	1.08822	0.97062	1.09153	-0.0625863
			1.02121	0.962567	0.915351	0.95358	1.03551	0.9256	0.999084	1.00955	1.03216	0.853052	1.19714	-0.220159
			1.02533	0.862836	1.20125	0.961868	1.00089	0.822354	1.07347	1.01419	0.794917	0.978485	1.1872	-0.23814
			0.945939	0.845681	0.961281	0.814356	1.00121	1.03011	1.01856	0.940447	1.06418	1.12928	0.868023	0.0655833
			C8
			1.08739	0.617245	0.606005	0.783996	0.825687	0.757564	0.85819	0.955303	1.04309	1.01356	0.919859	0.0107871
			0.998353	0.754567	0.650198	0.915695	0.805996	1.05678	0.962882	0.962721	0.890945	0.984477	0.916889	-0.420825
			0.983112	0.662798	0.570633	0.816831	0.847077	0.917062	0.903651	0.87441	0.942129	1.01761	0.931964	0.0633614
			0.931146	0.601328	0.634142	0.770378	0.899569	0.964861	1.01868	1.09463	0.780074	1.00526	0.982403	-0.25576
			P1
			1.07465	0.750146	0.74651	0.828339	1.00569	0.957222	1.06297	0.931744	0.8907	0.960779	0.848949	0.147144
			0.922465	0.644222	0.76131	0.797924	0.983245	0.932738	0.966888	0.991732	1.11612	0.833	1.01065	0.24463
			1.00341	0.728416	0.838029	0.86533	0.940794	1.03676	0.833183	0.912749	0.997968	0.926549	1.04666	0.0758406
			1.30056	0.659607	0.837255	0.809858	0.816899	0.928989	0.90986	0.957786	0.97241	1.01223	1.02486	-0.0205029
