# Supplementary material for: Targeting RNA:protein interactions with an integrative approach leads to the identification of potent YBX1 inhibitors
Source: eLife journal article supplement (doi:10.7554/elife.80387), 2023-01-18
Supplement: supp [file elife-80387-supp-v1.zip › elife_poa_e80387_Figure_8_Figure_supplement_1.pdf]

**a**

DMSO

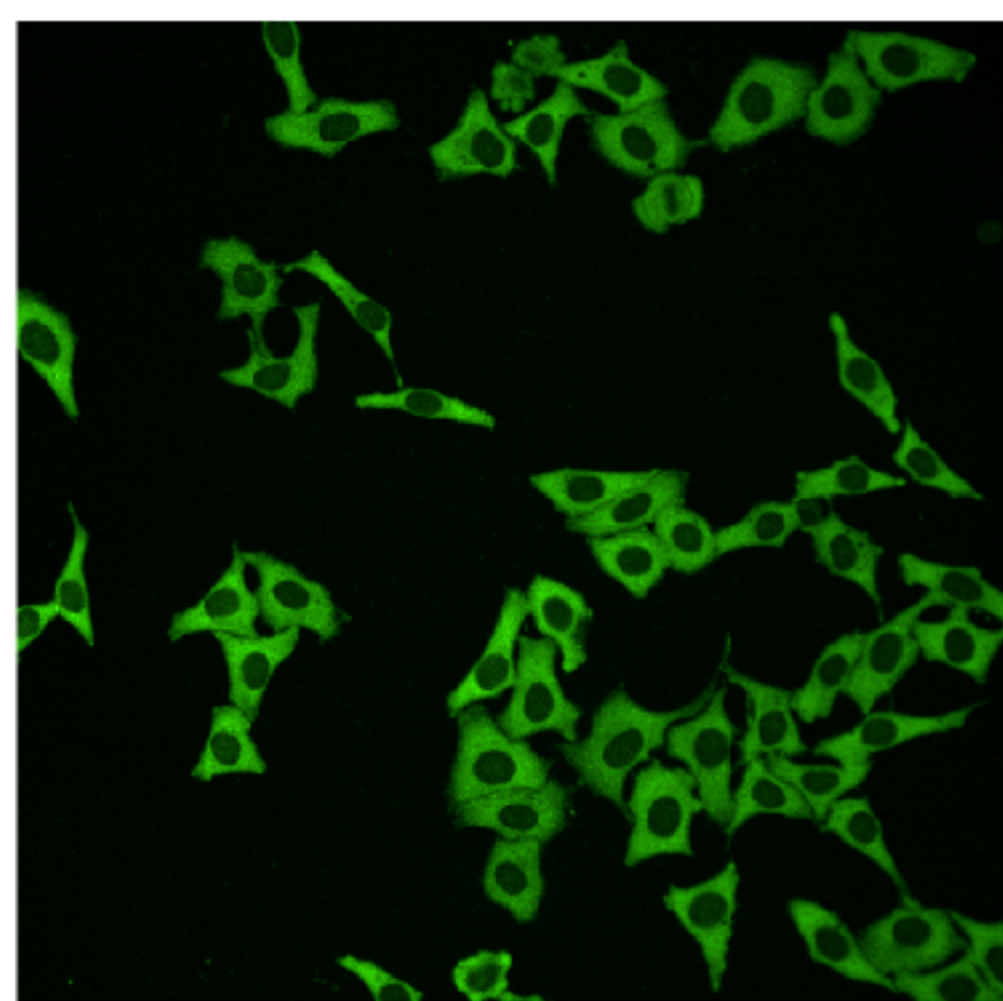at 100  $\mu$ M

P4

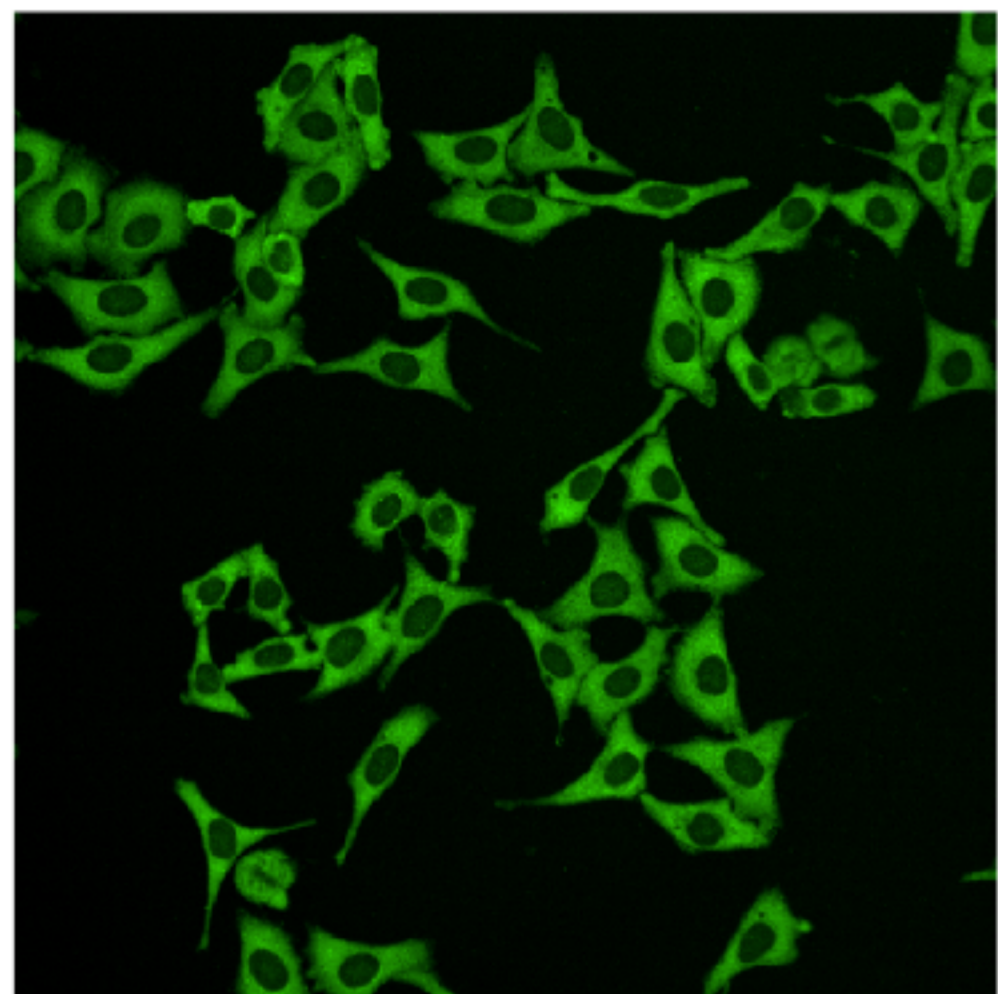

P5

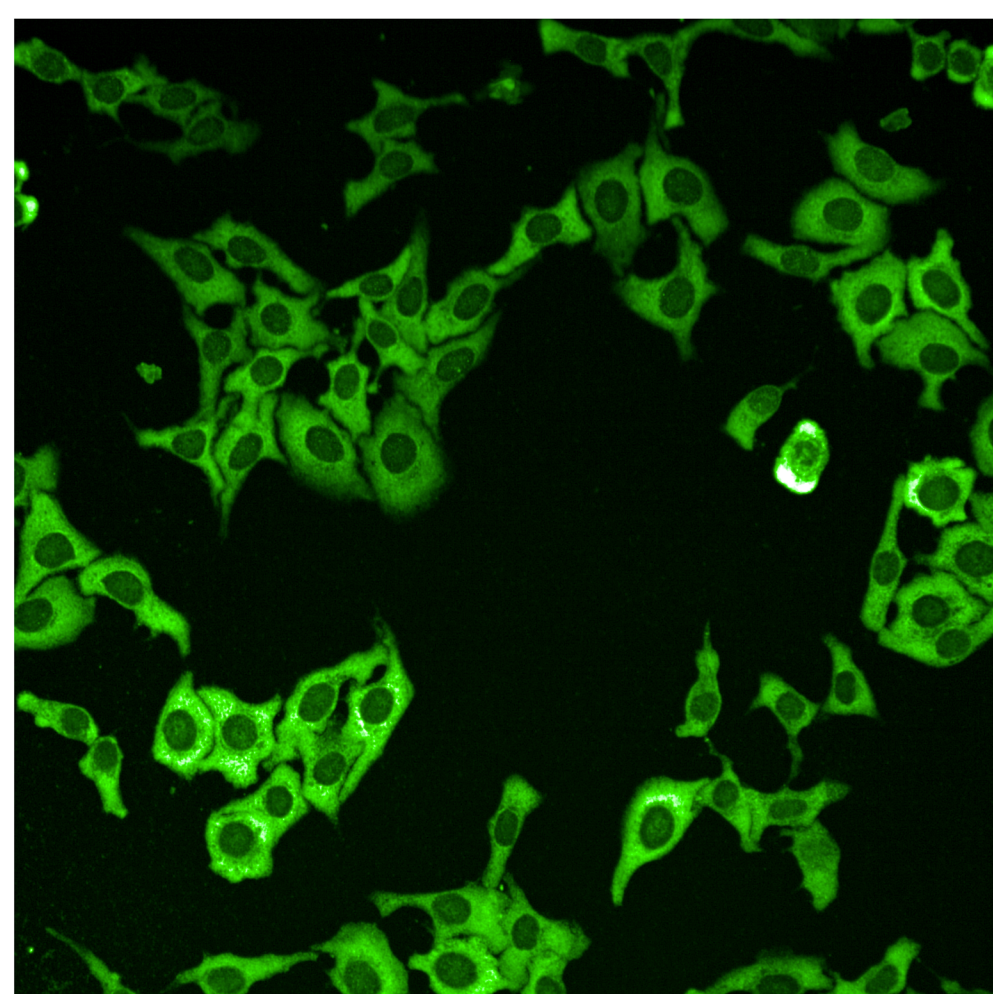

P2

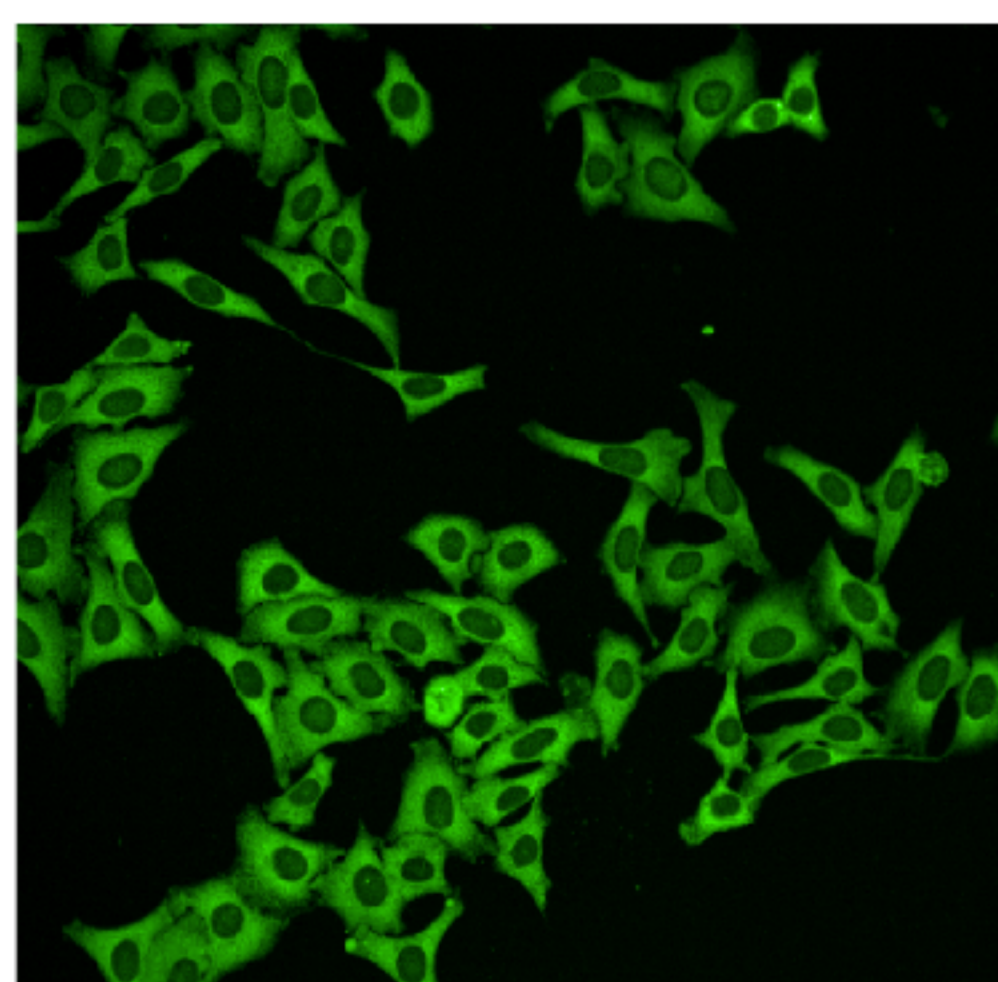

P3

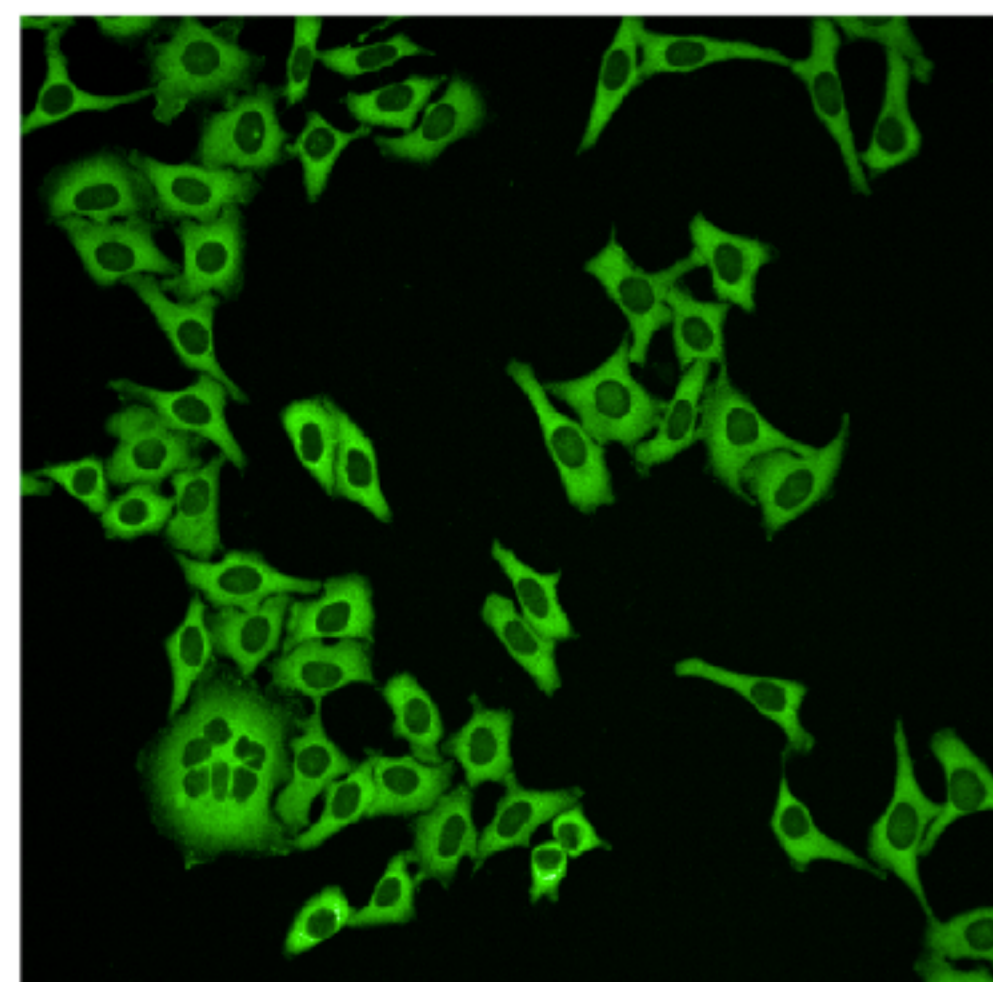

Anti-YB-1-1

**c**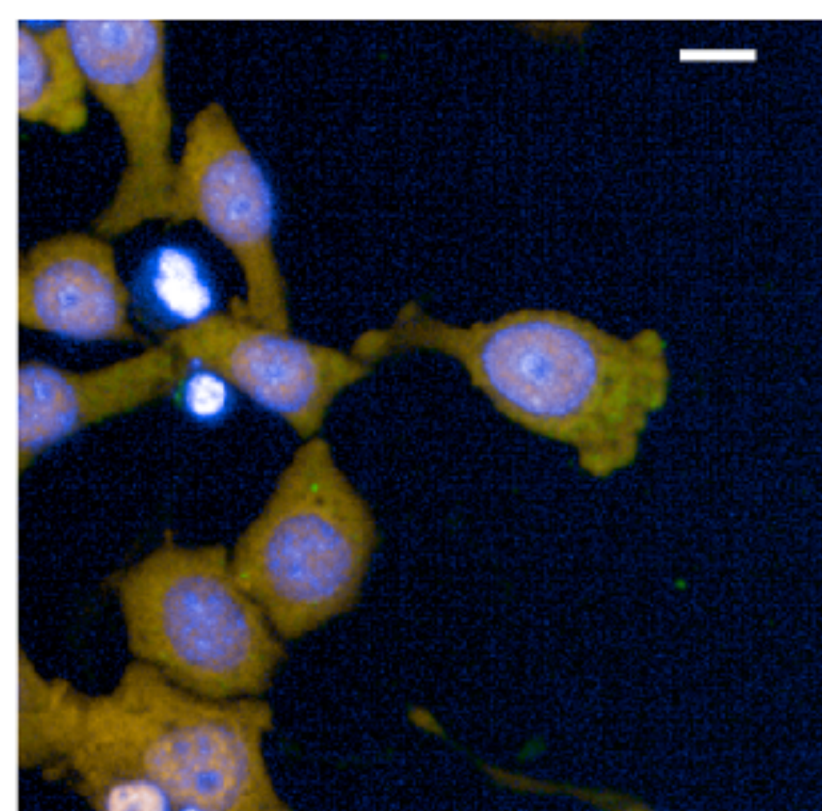P1, 100  $\mu$ M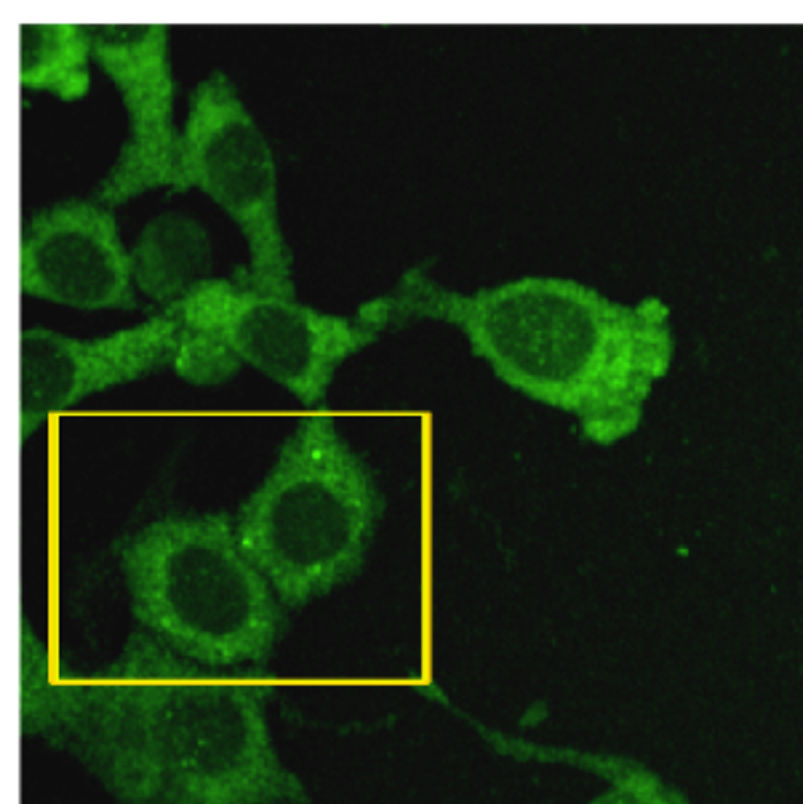

Anti-YB-1-1

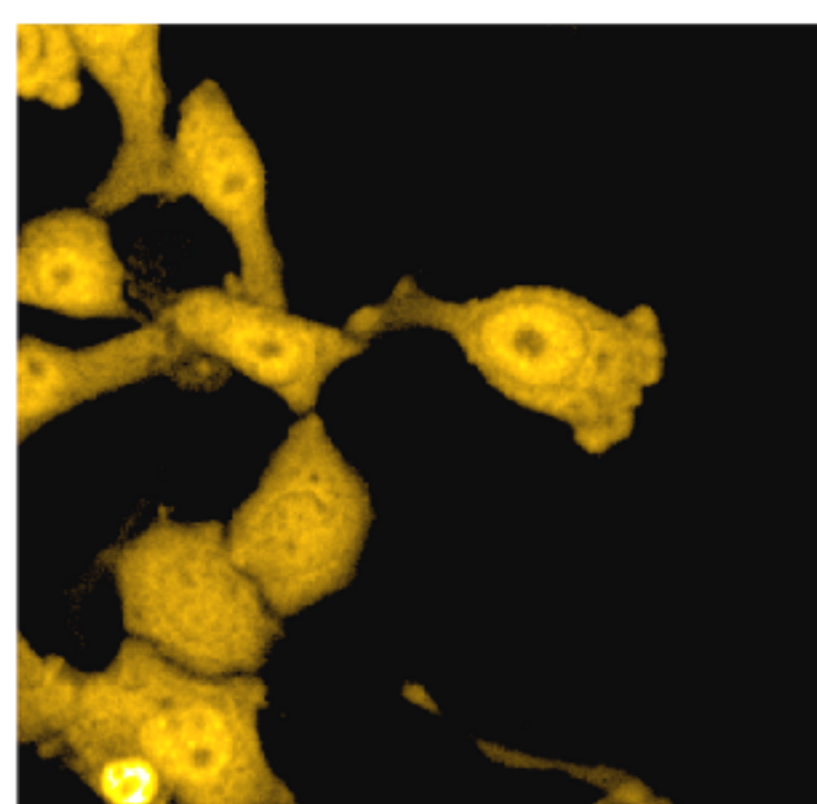

mRNA

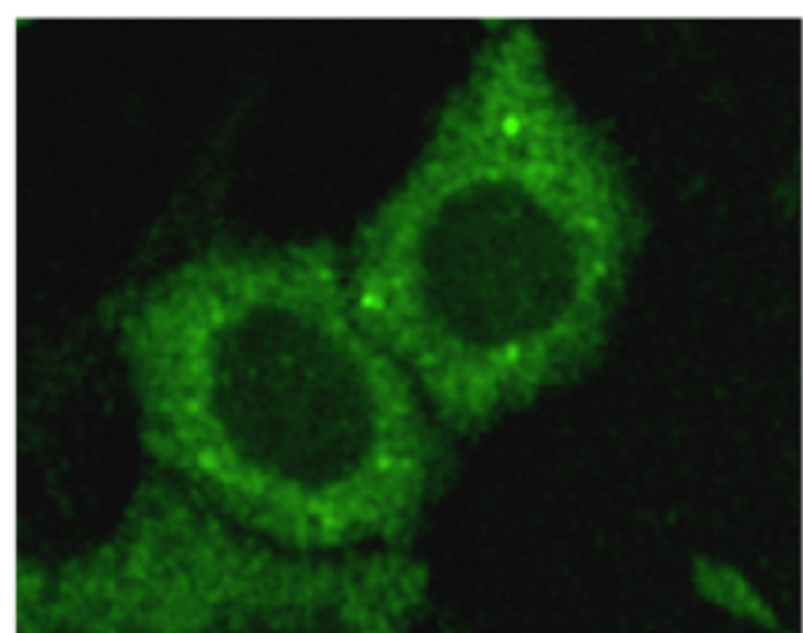

mRNA

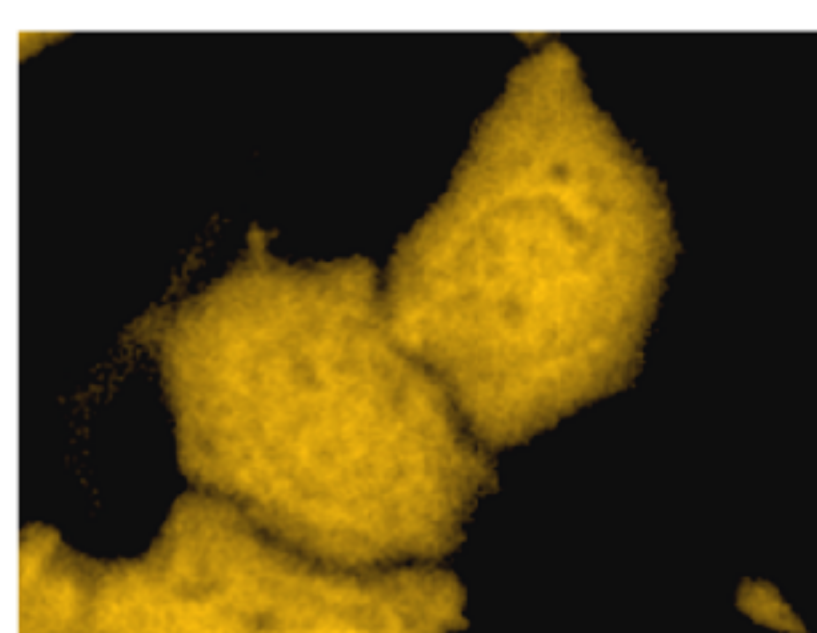

Anti-YB-1 -2

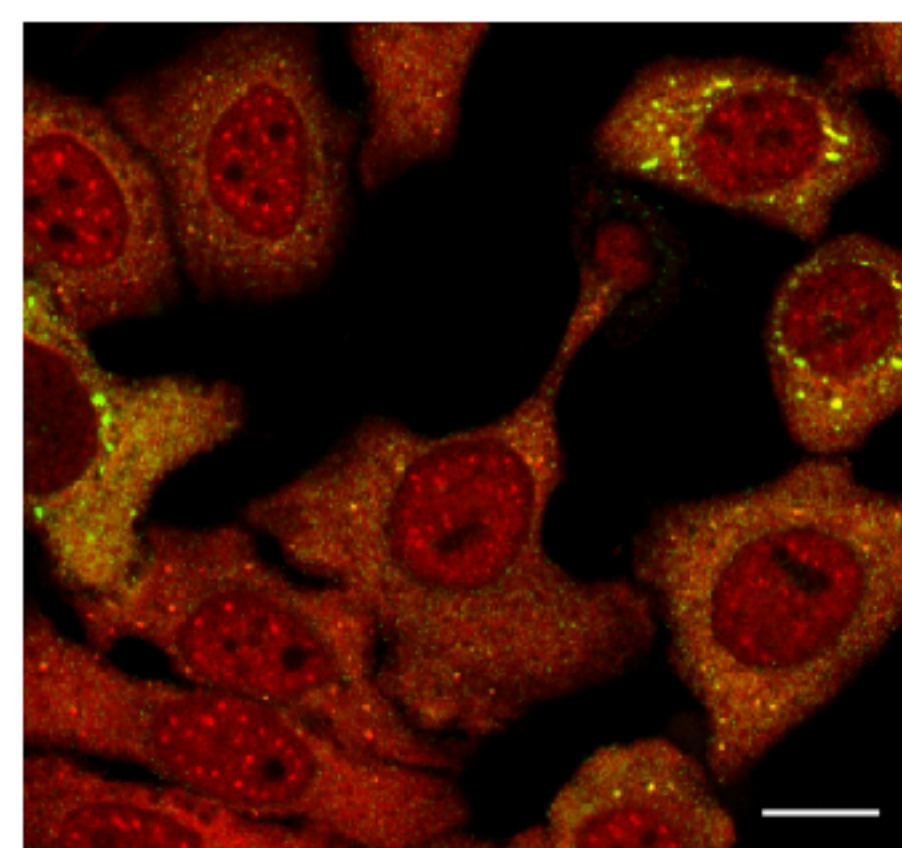anti-YB-1 -2  
mRNA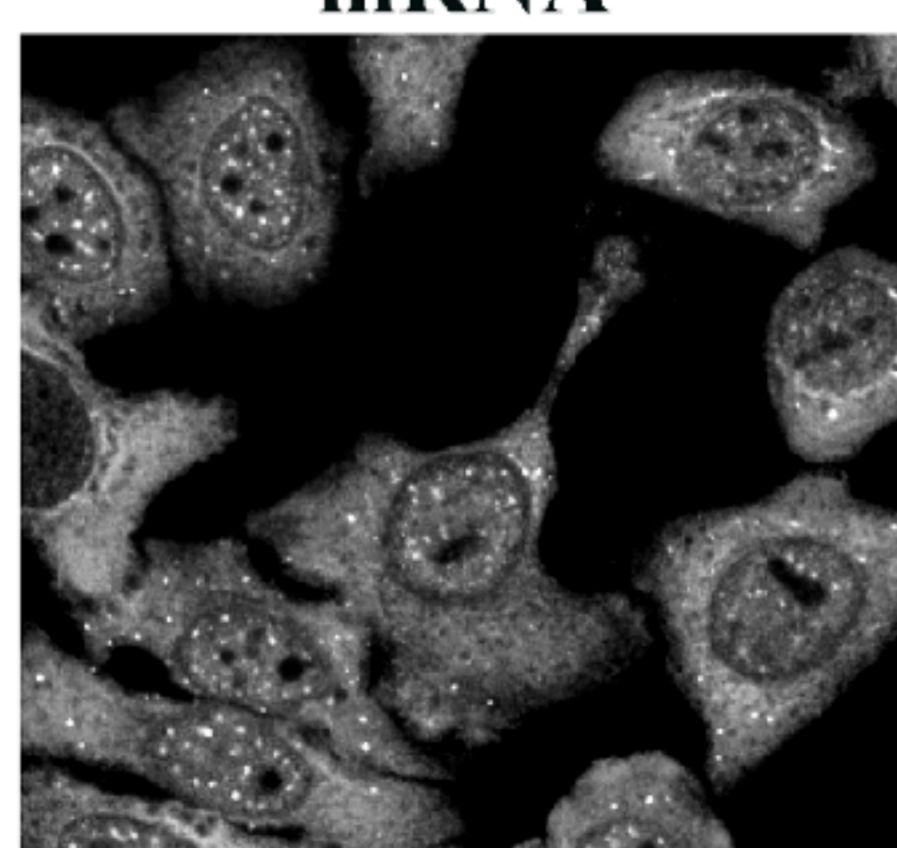P1, 100  $\mu$ M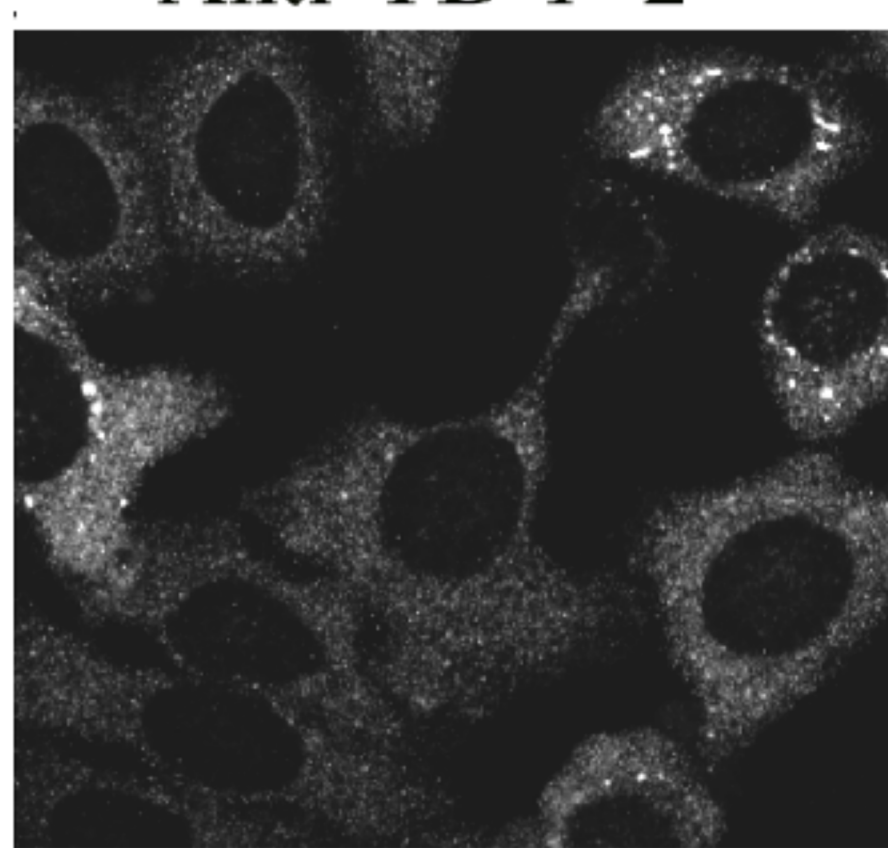**b**P1, 20 $\mu$ M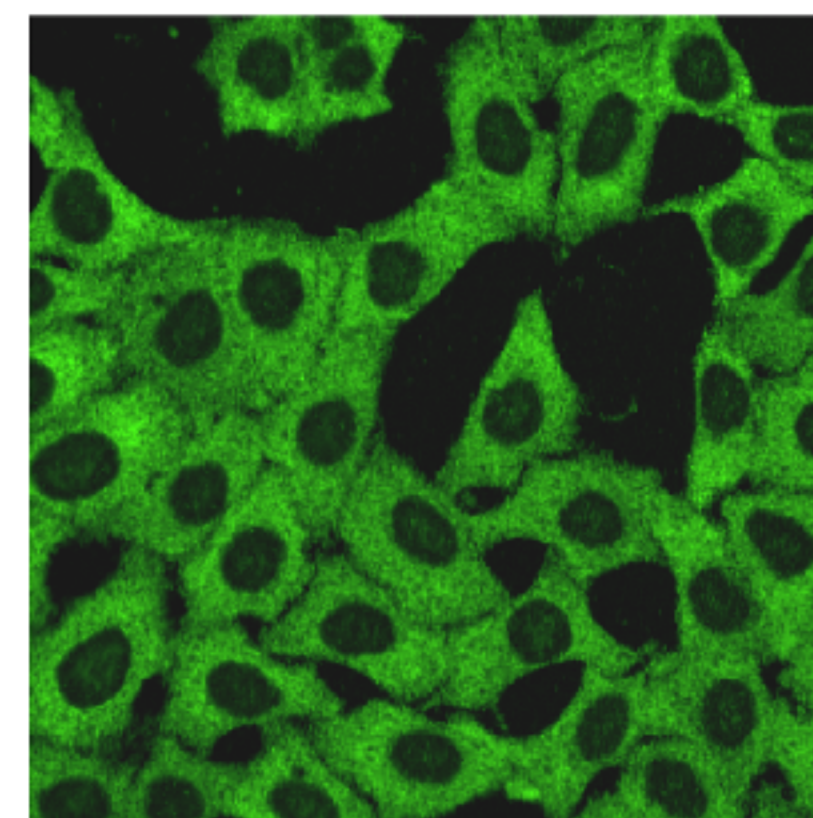P1, 50  $\mu$ M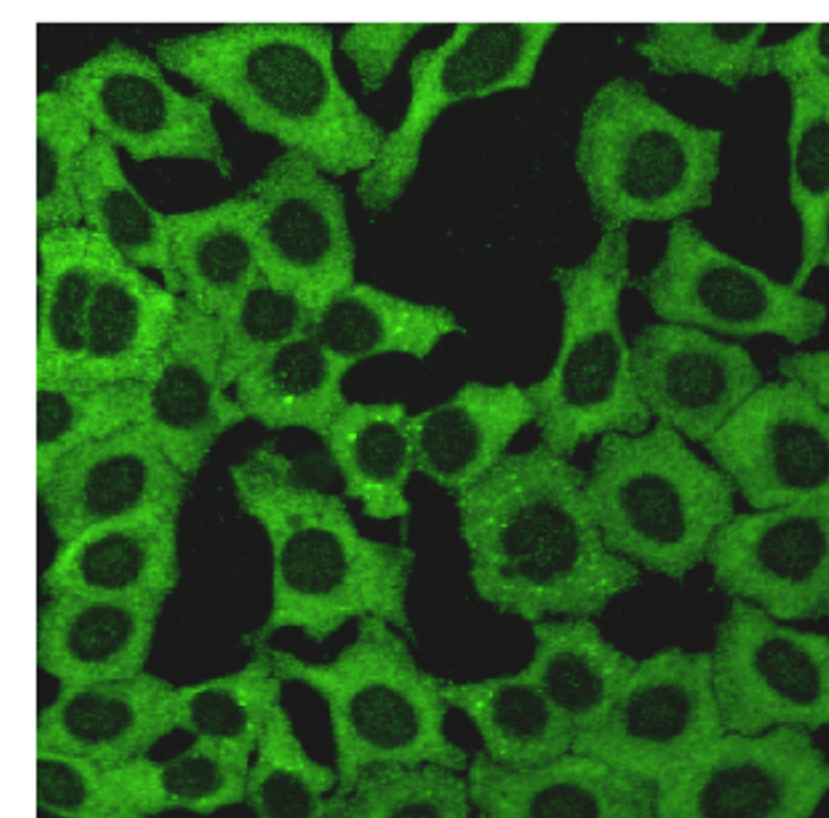P1, 100  $\mu$ M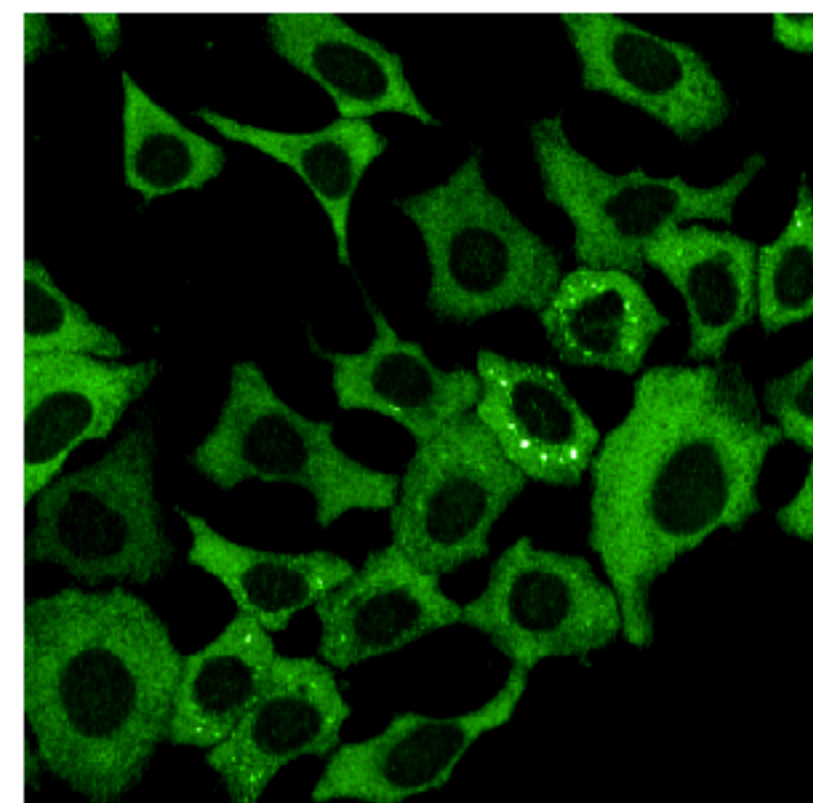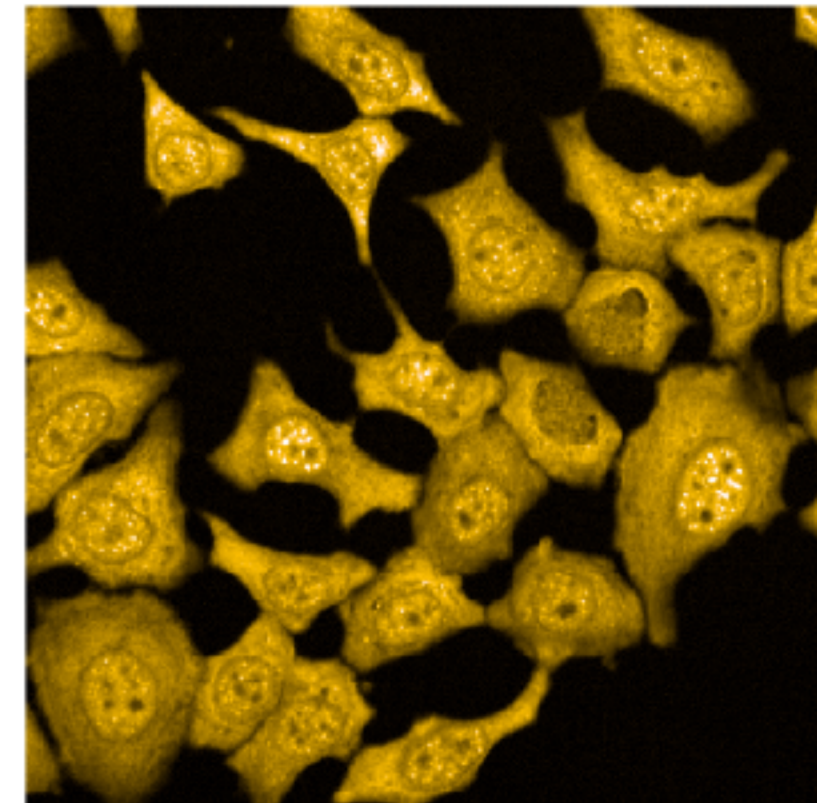Arsenite, 200  $\mu$ M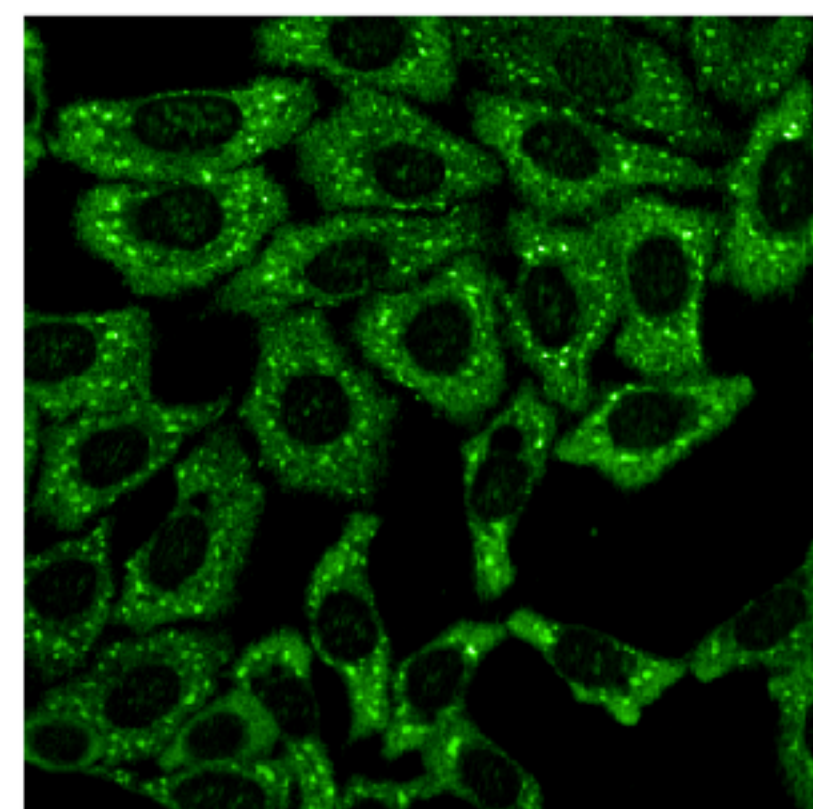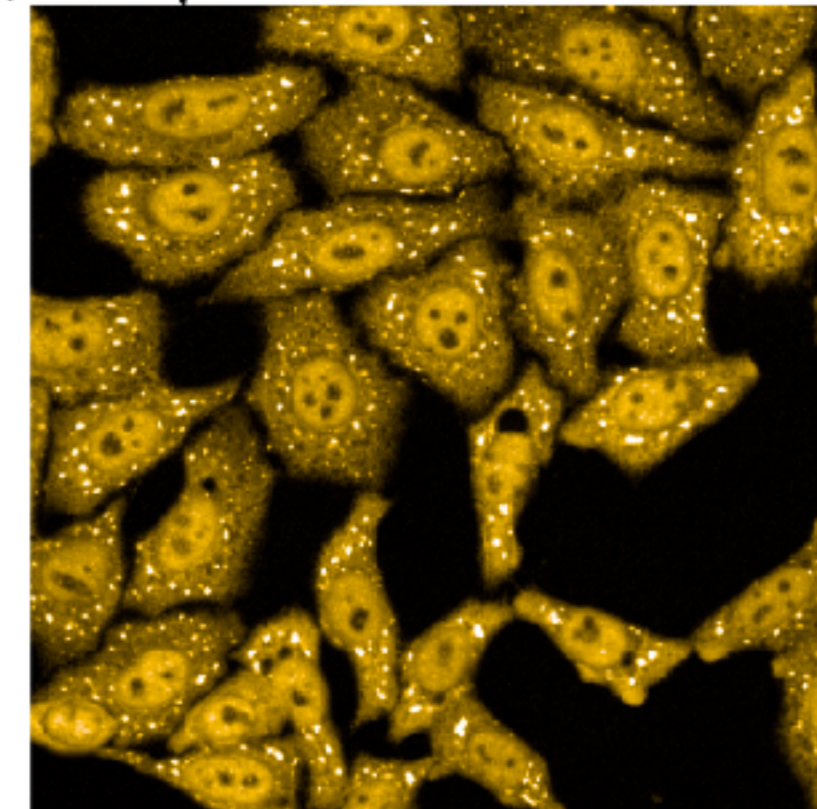

Anti-YB-1-1

mRNA

**d**

Anti-YB-3

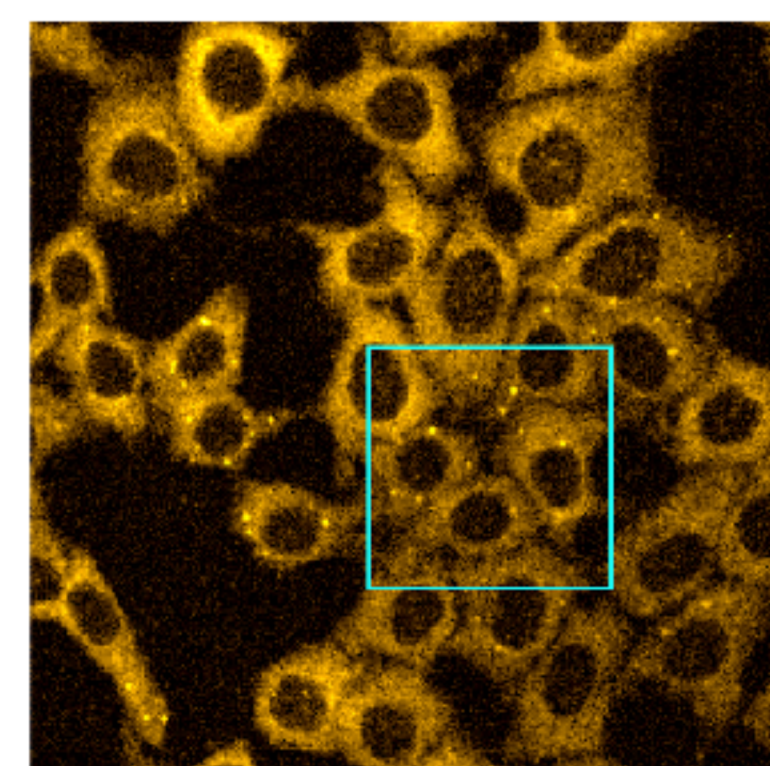

Anti-HuR

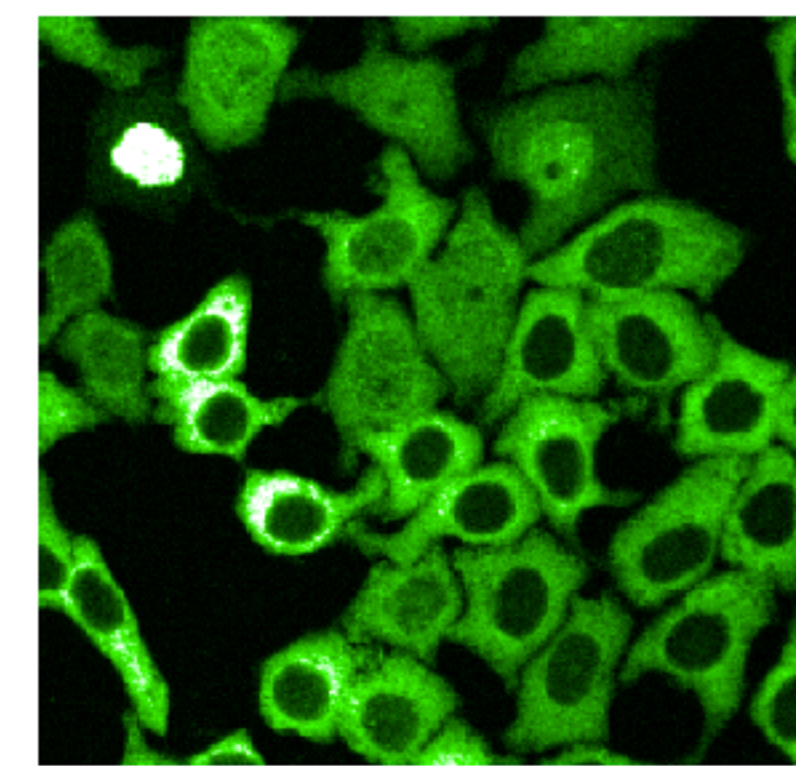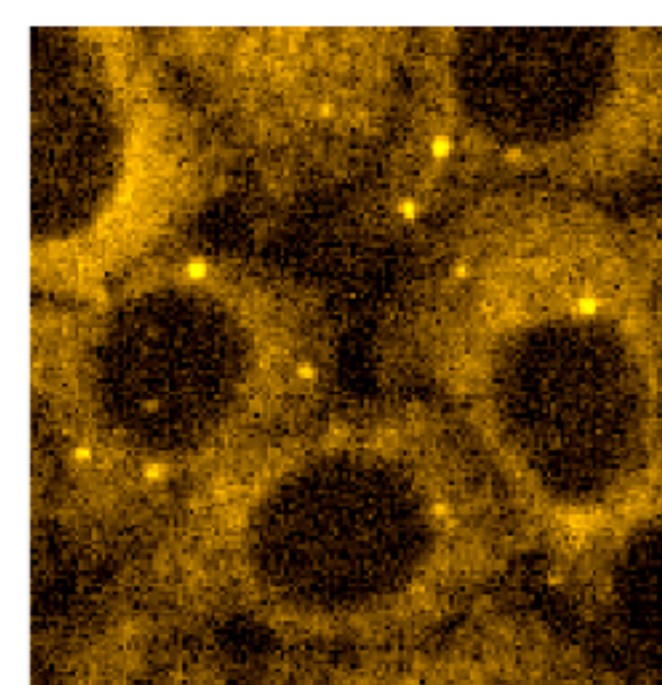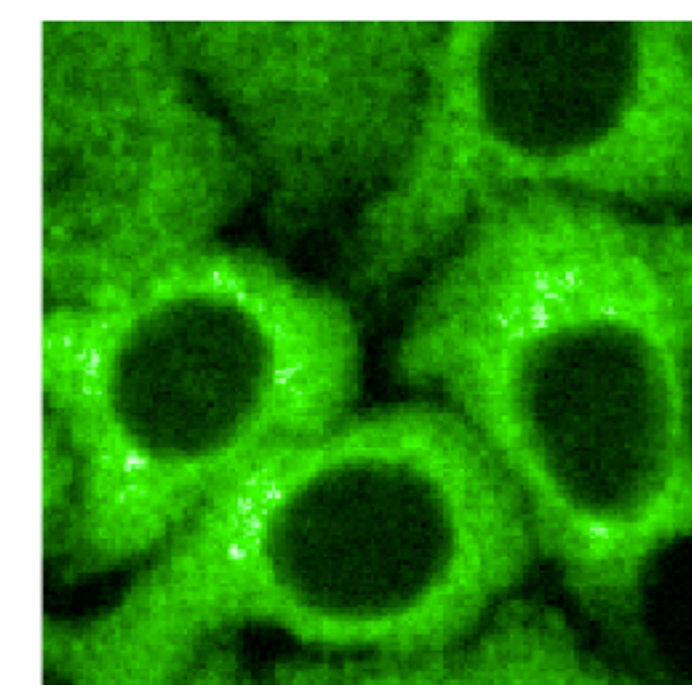P1, 100  $\mu$ M
