# Supplementary material for: Targeting RNA:protein interactions with an integrative approach leads to the identification of potent YBX1 inhibitors
Source: eLife journal article supplement (doi:10.7554/elife.80387), 2023-01-18
Supplement: supp [file elife-80387-supp-v1.zip › elife_poa_e80387_Figure_8_figure_supplement_3.pdf]

**a**40  $\mu$ m

siNEG

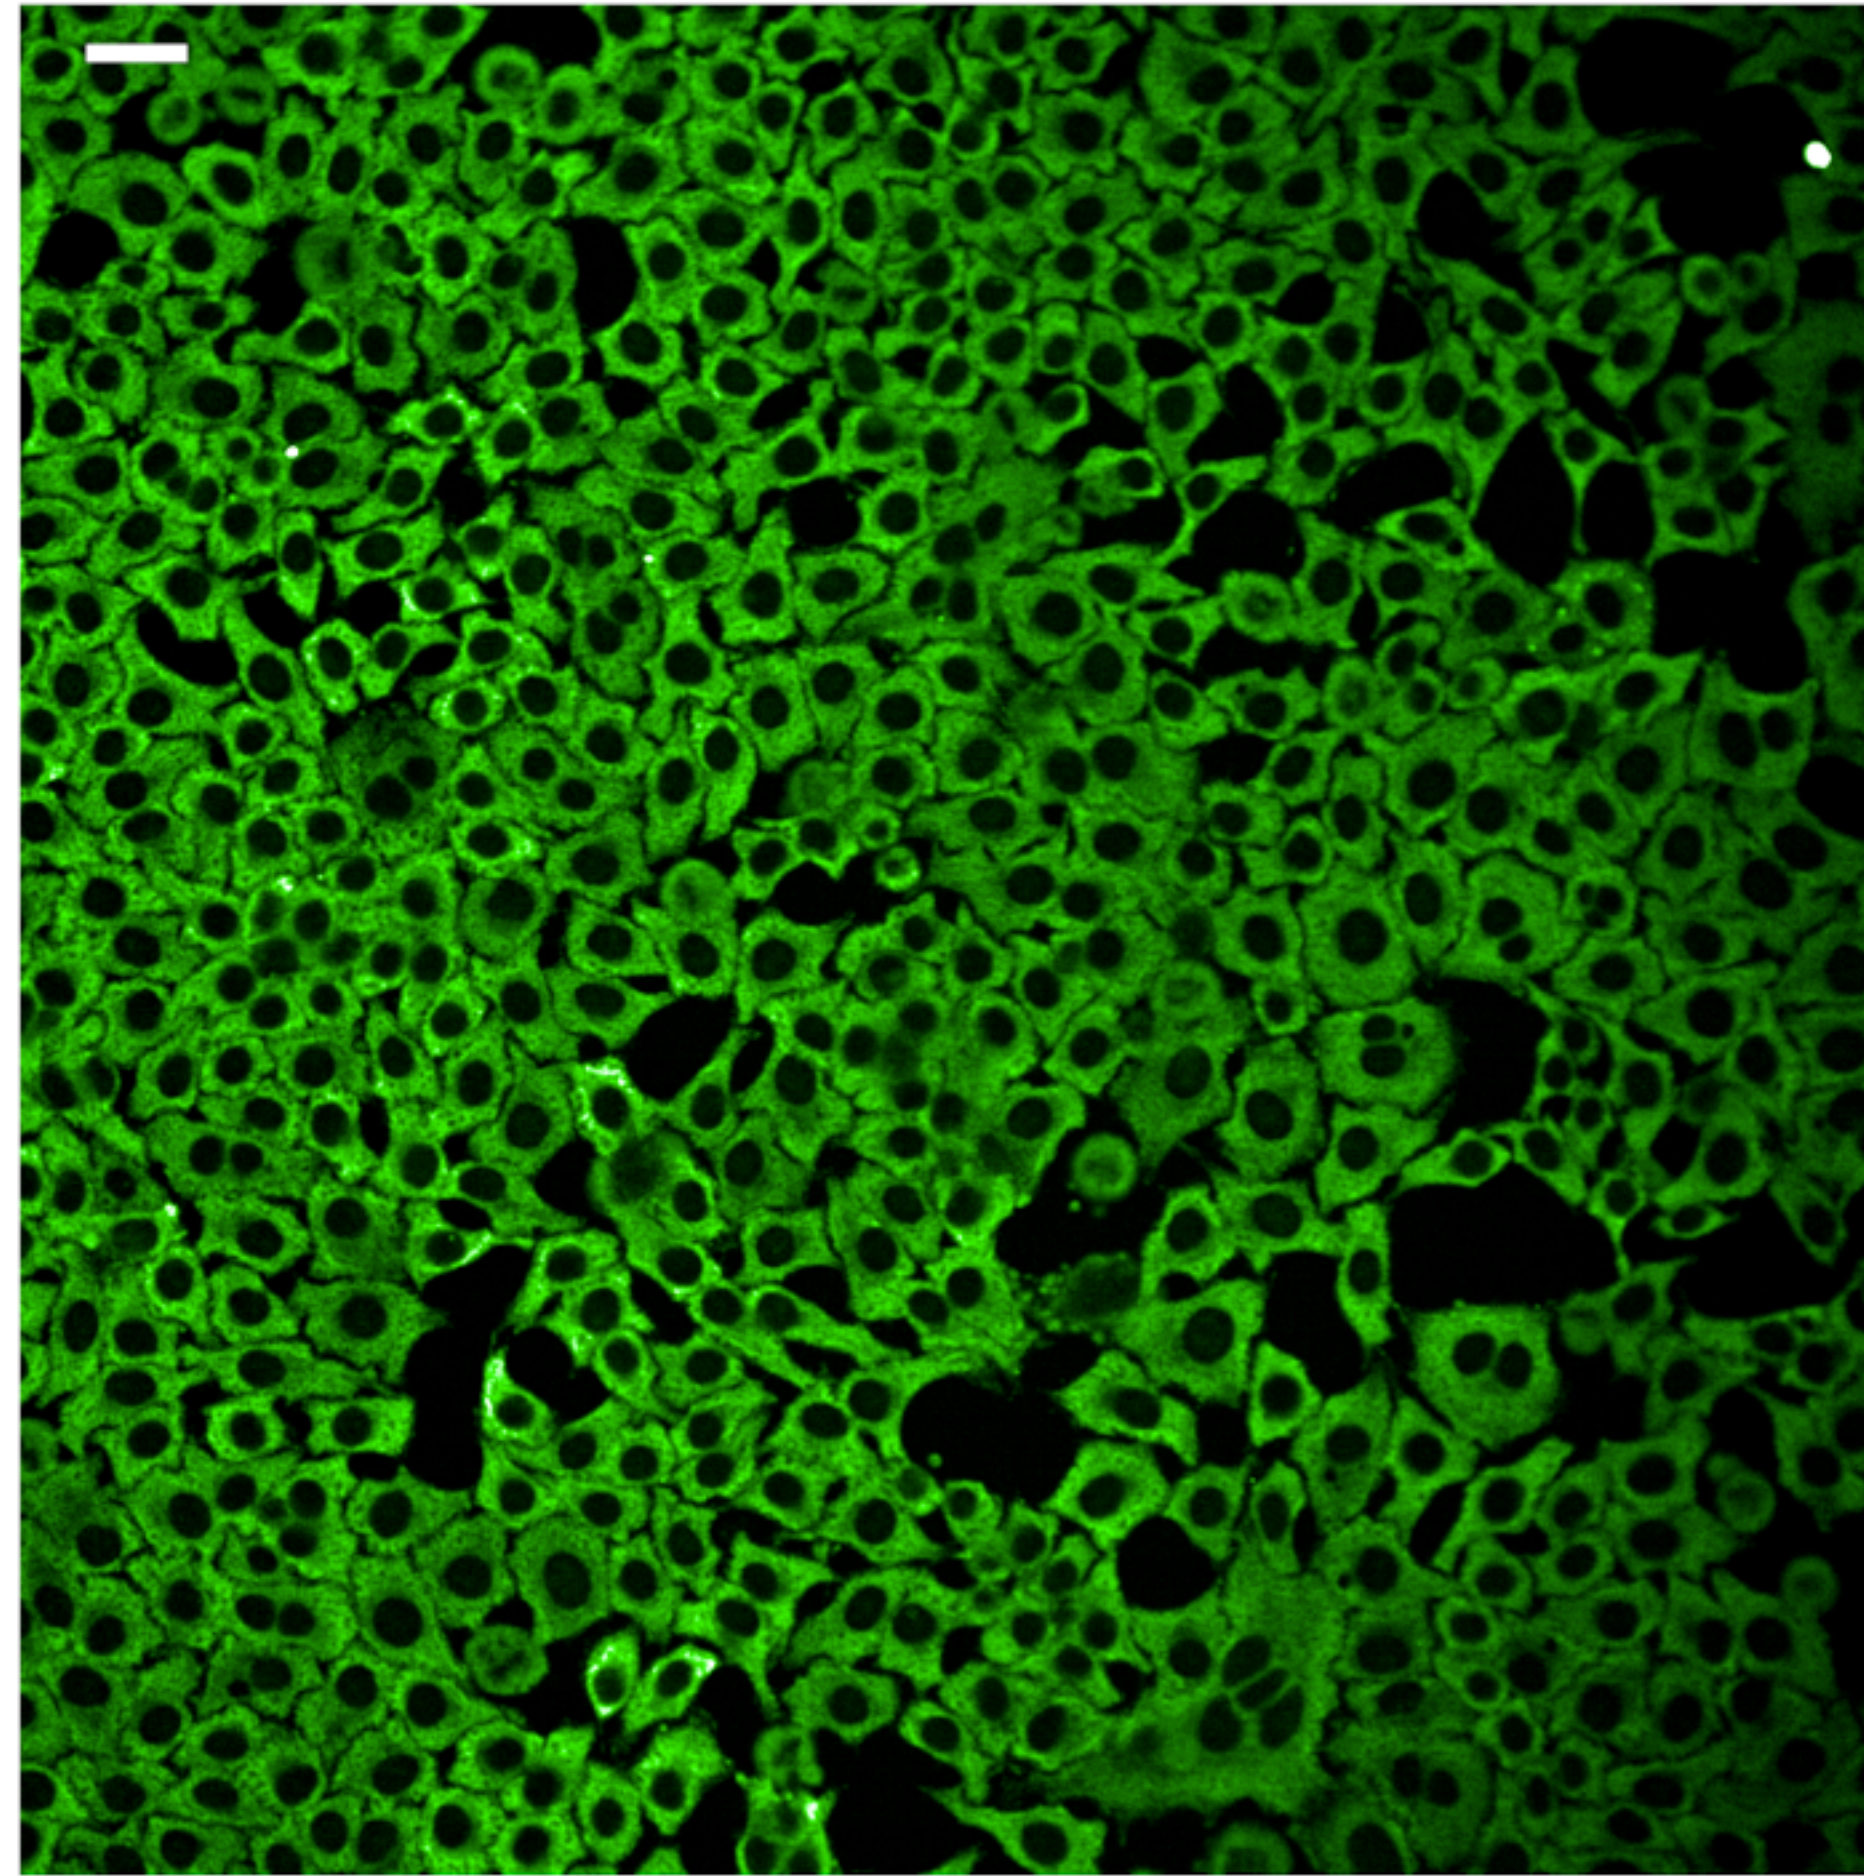

siRNA-1

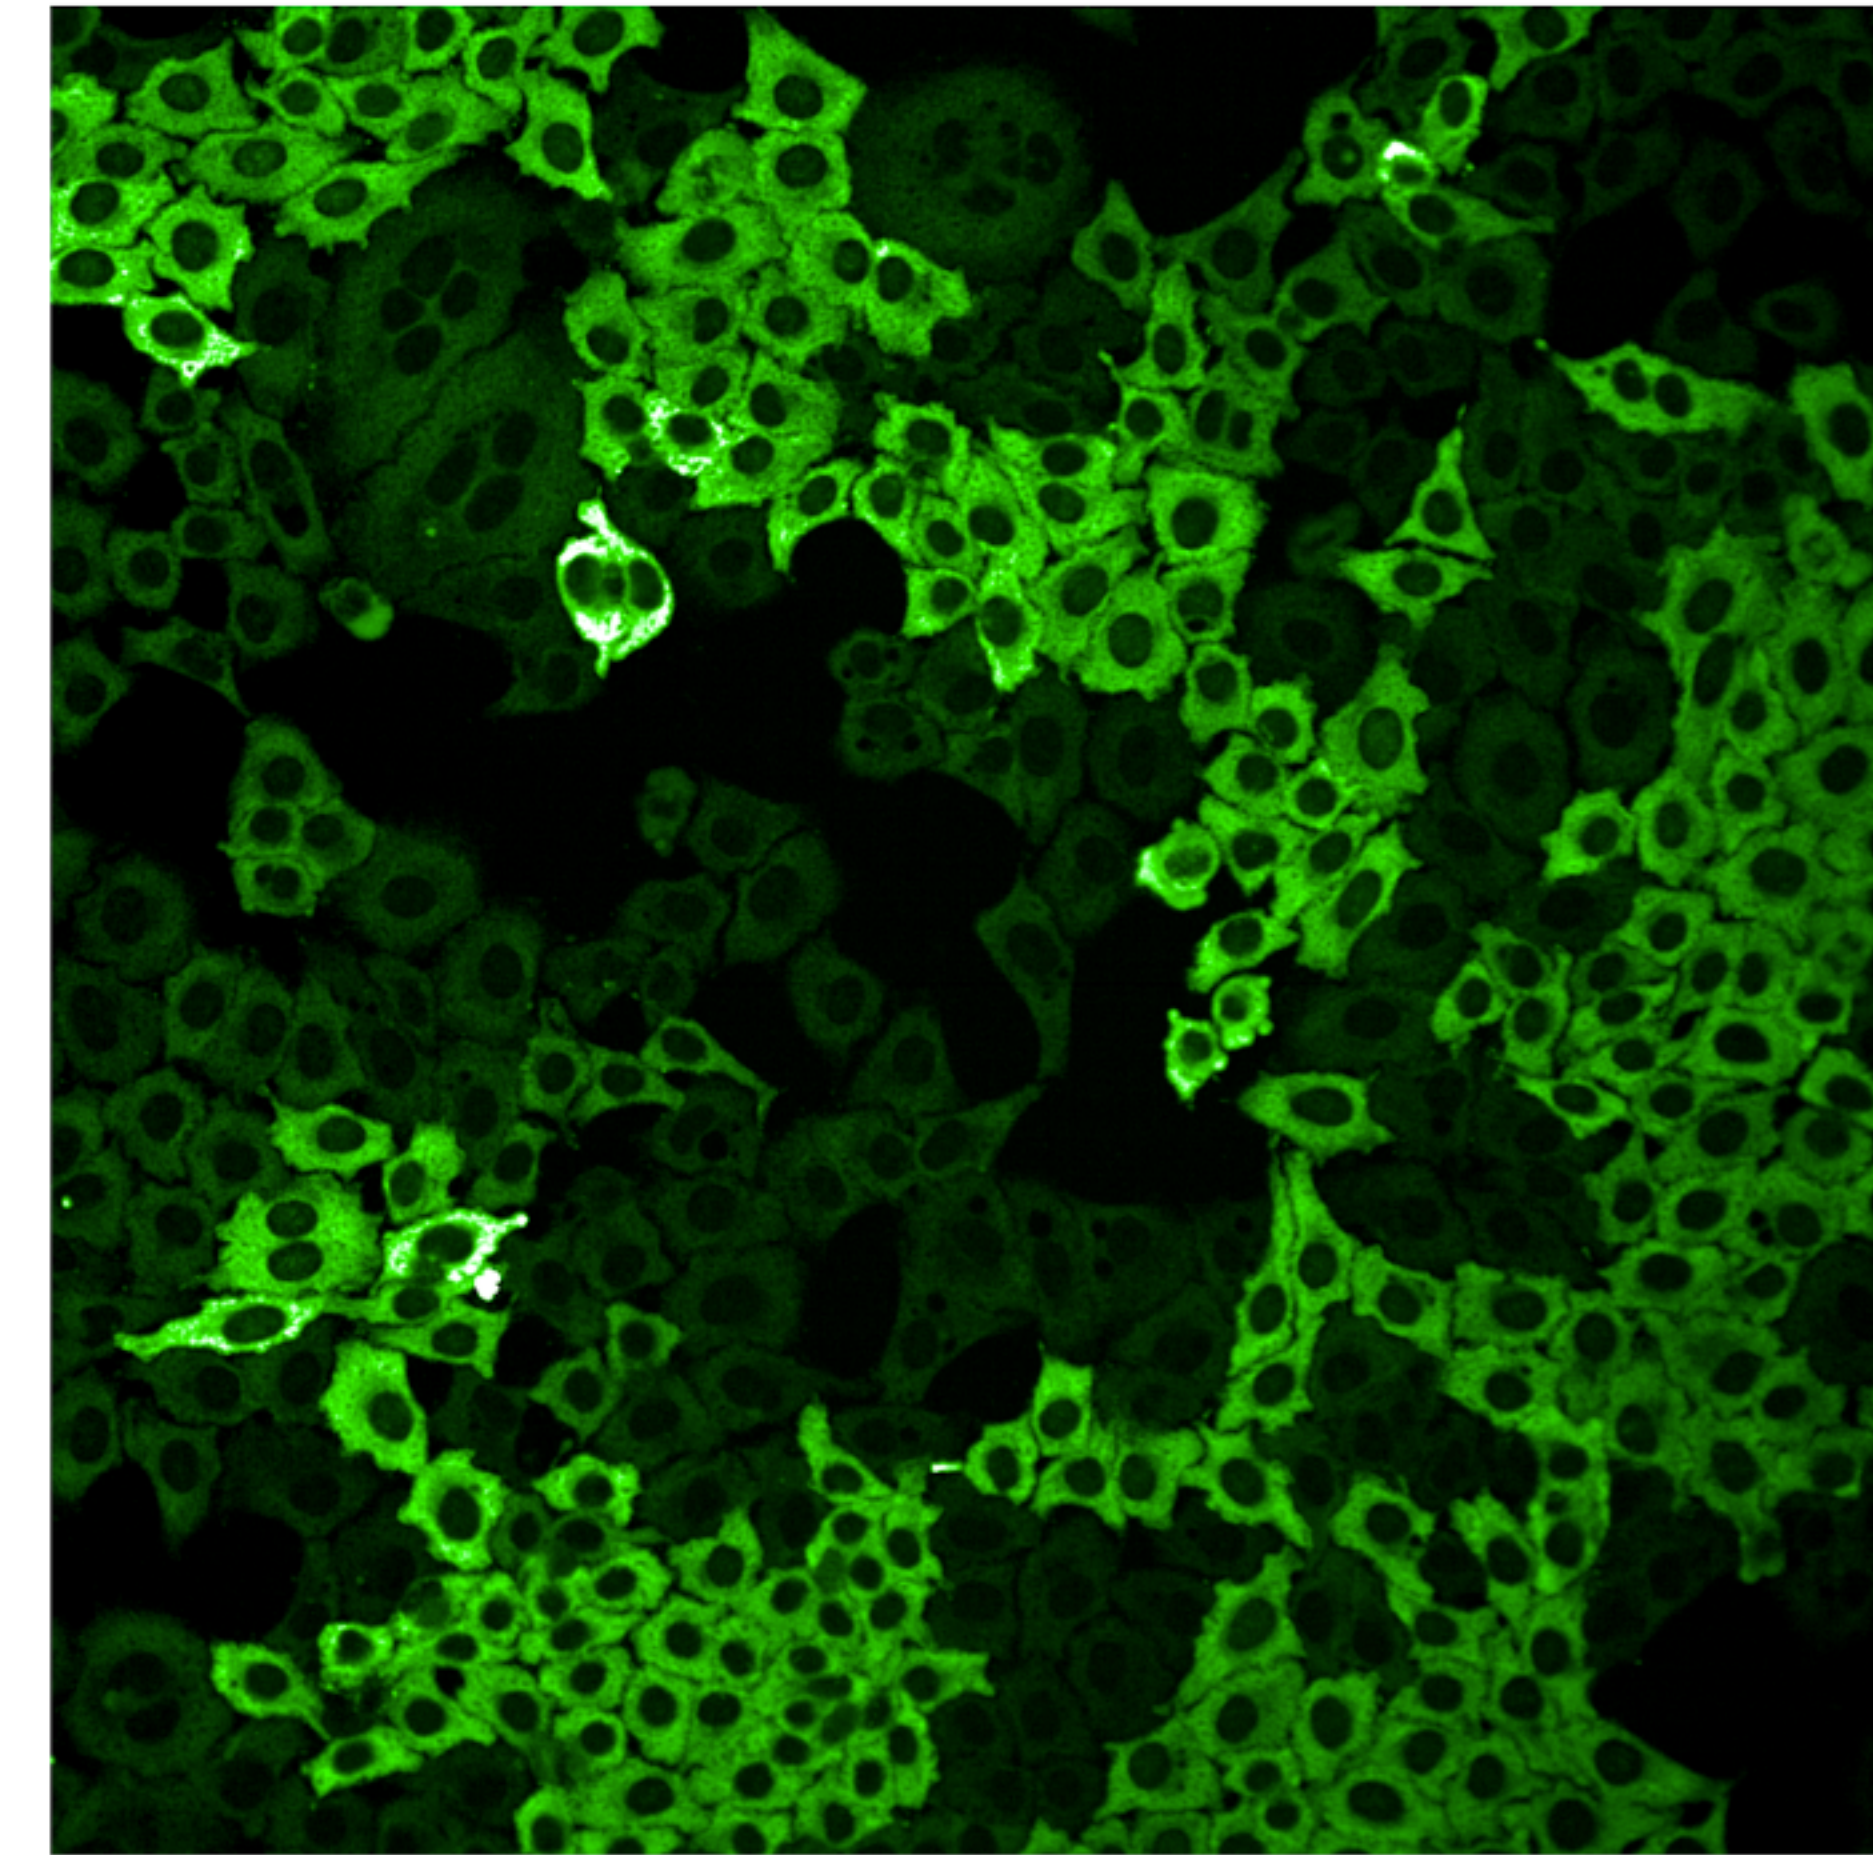

Cell selection

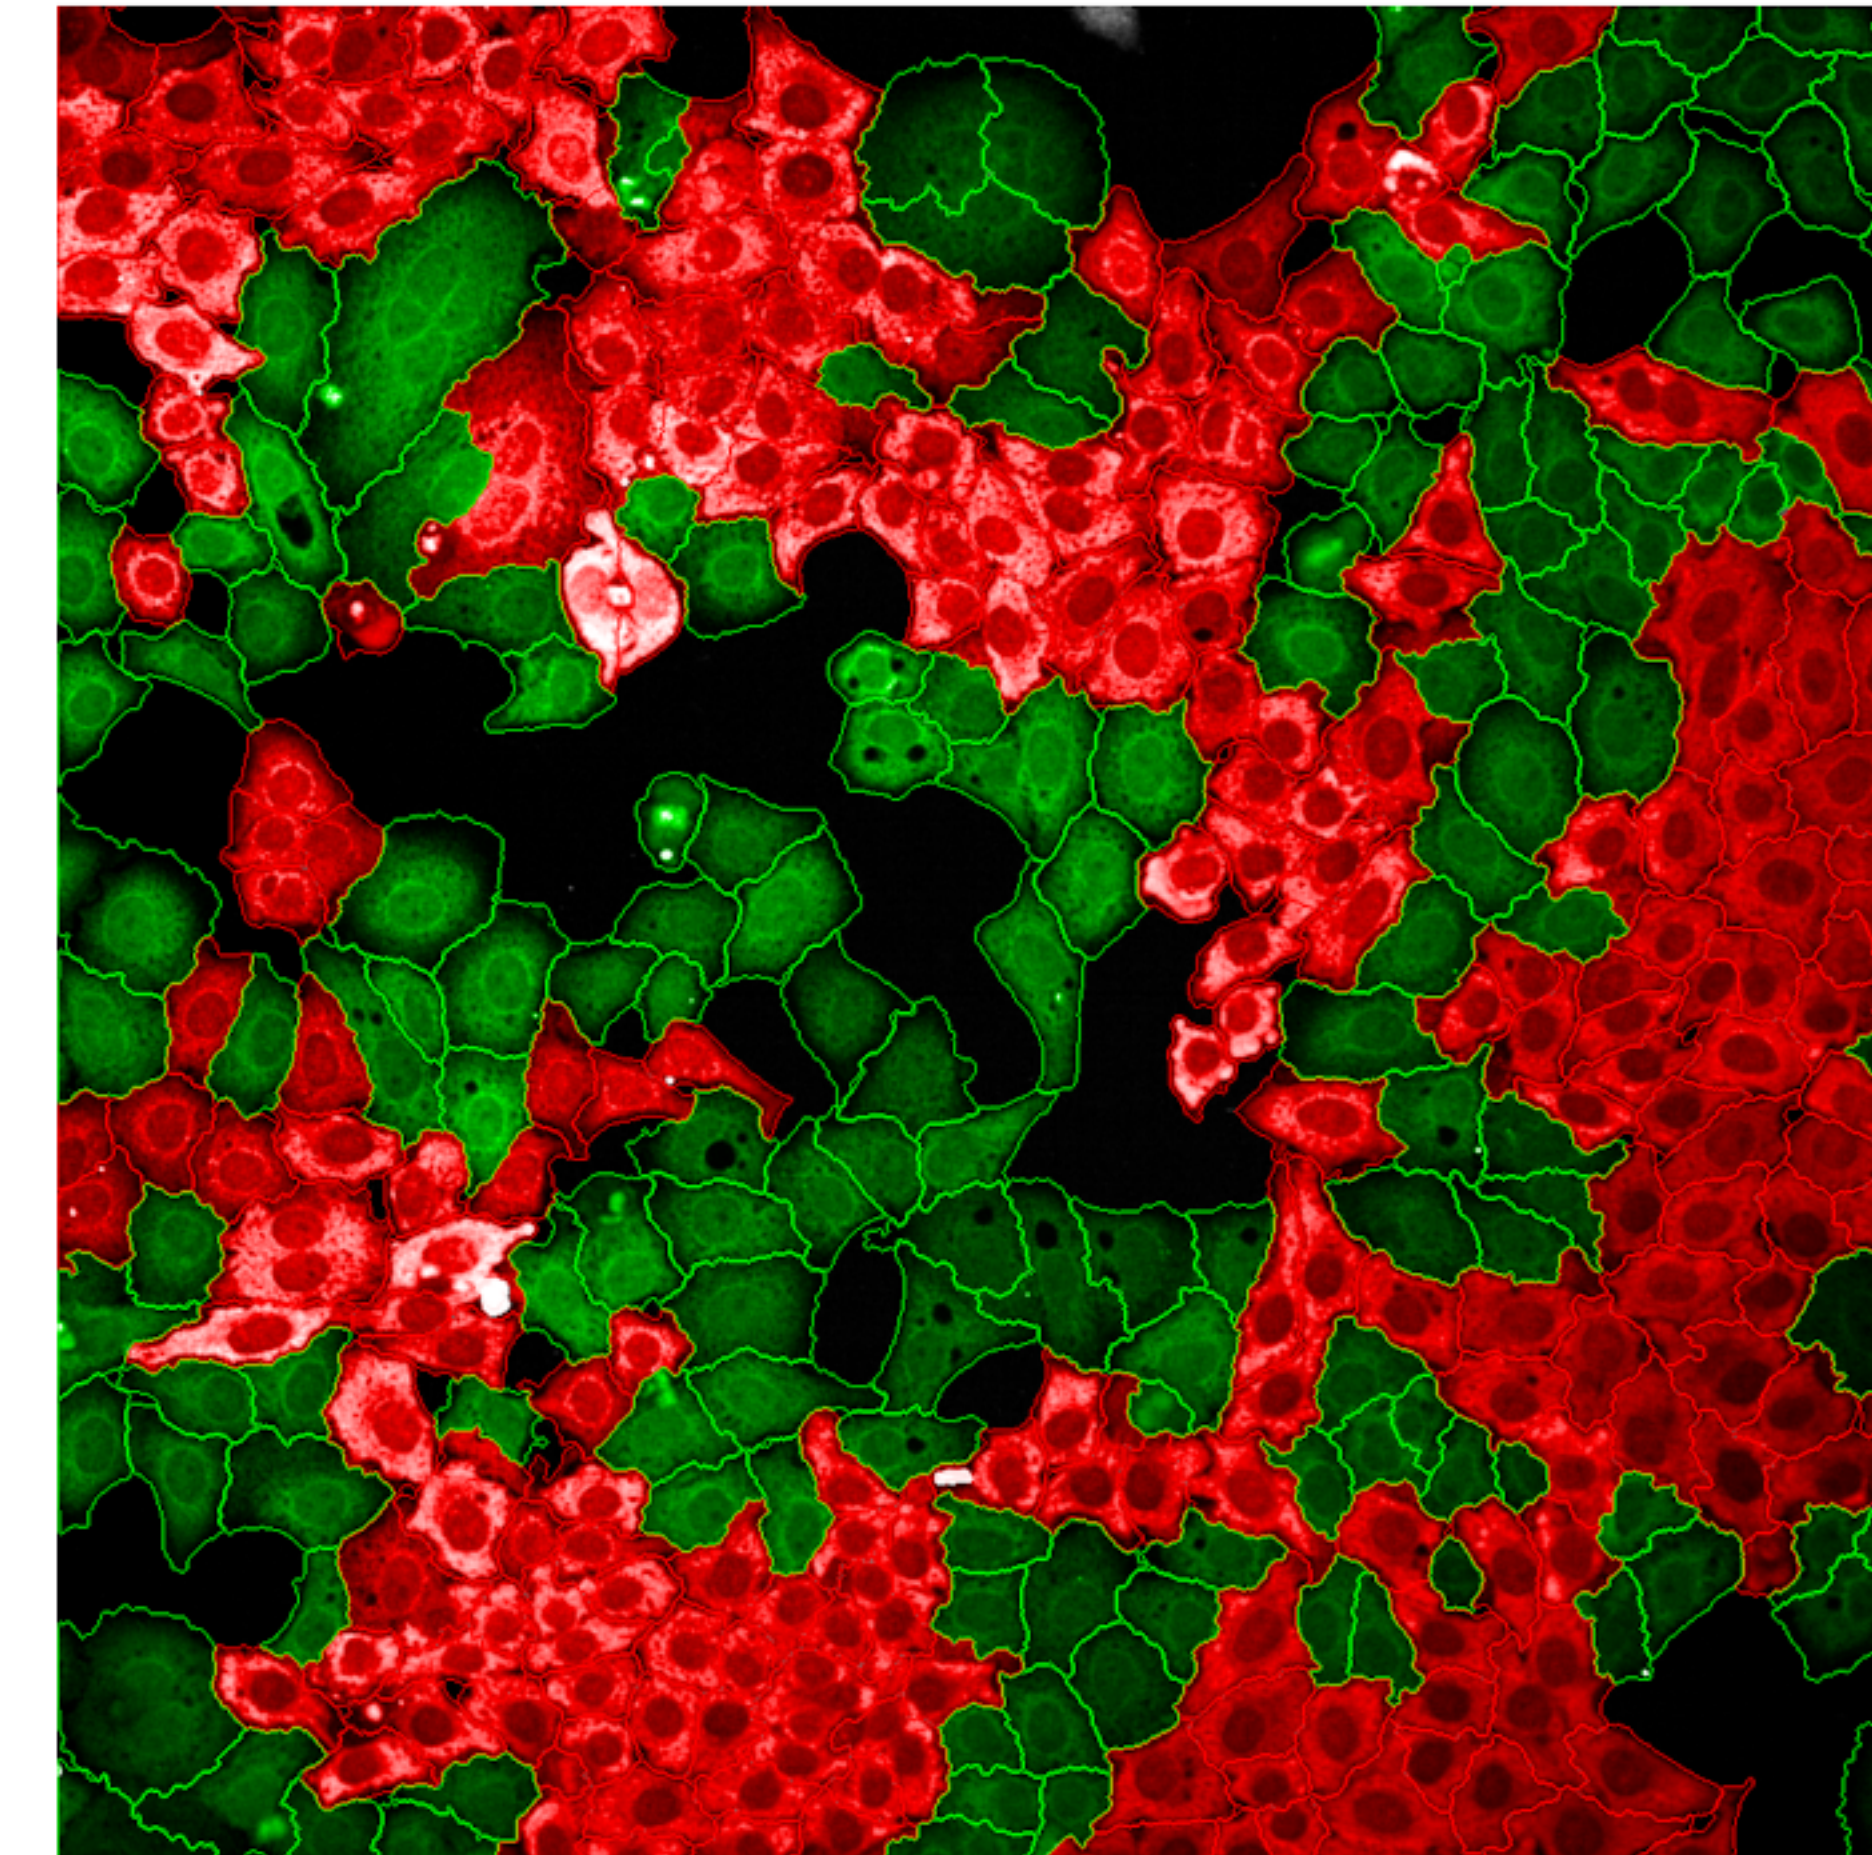

Anti-YB-1

**b**

siRNA-1

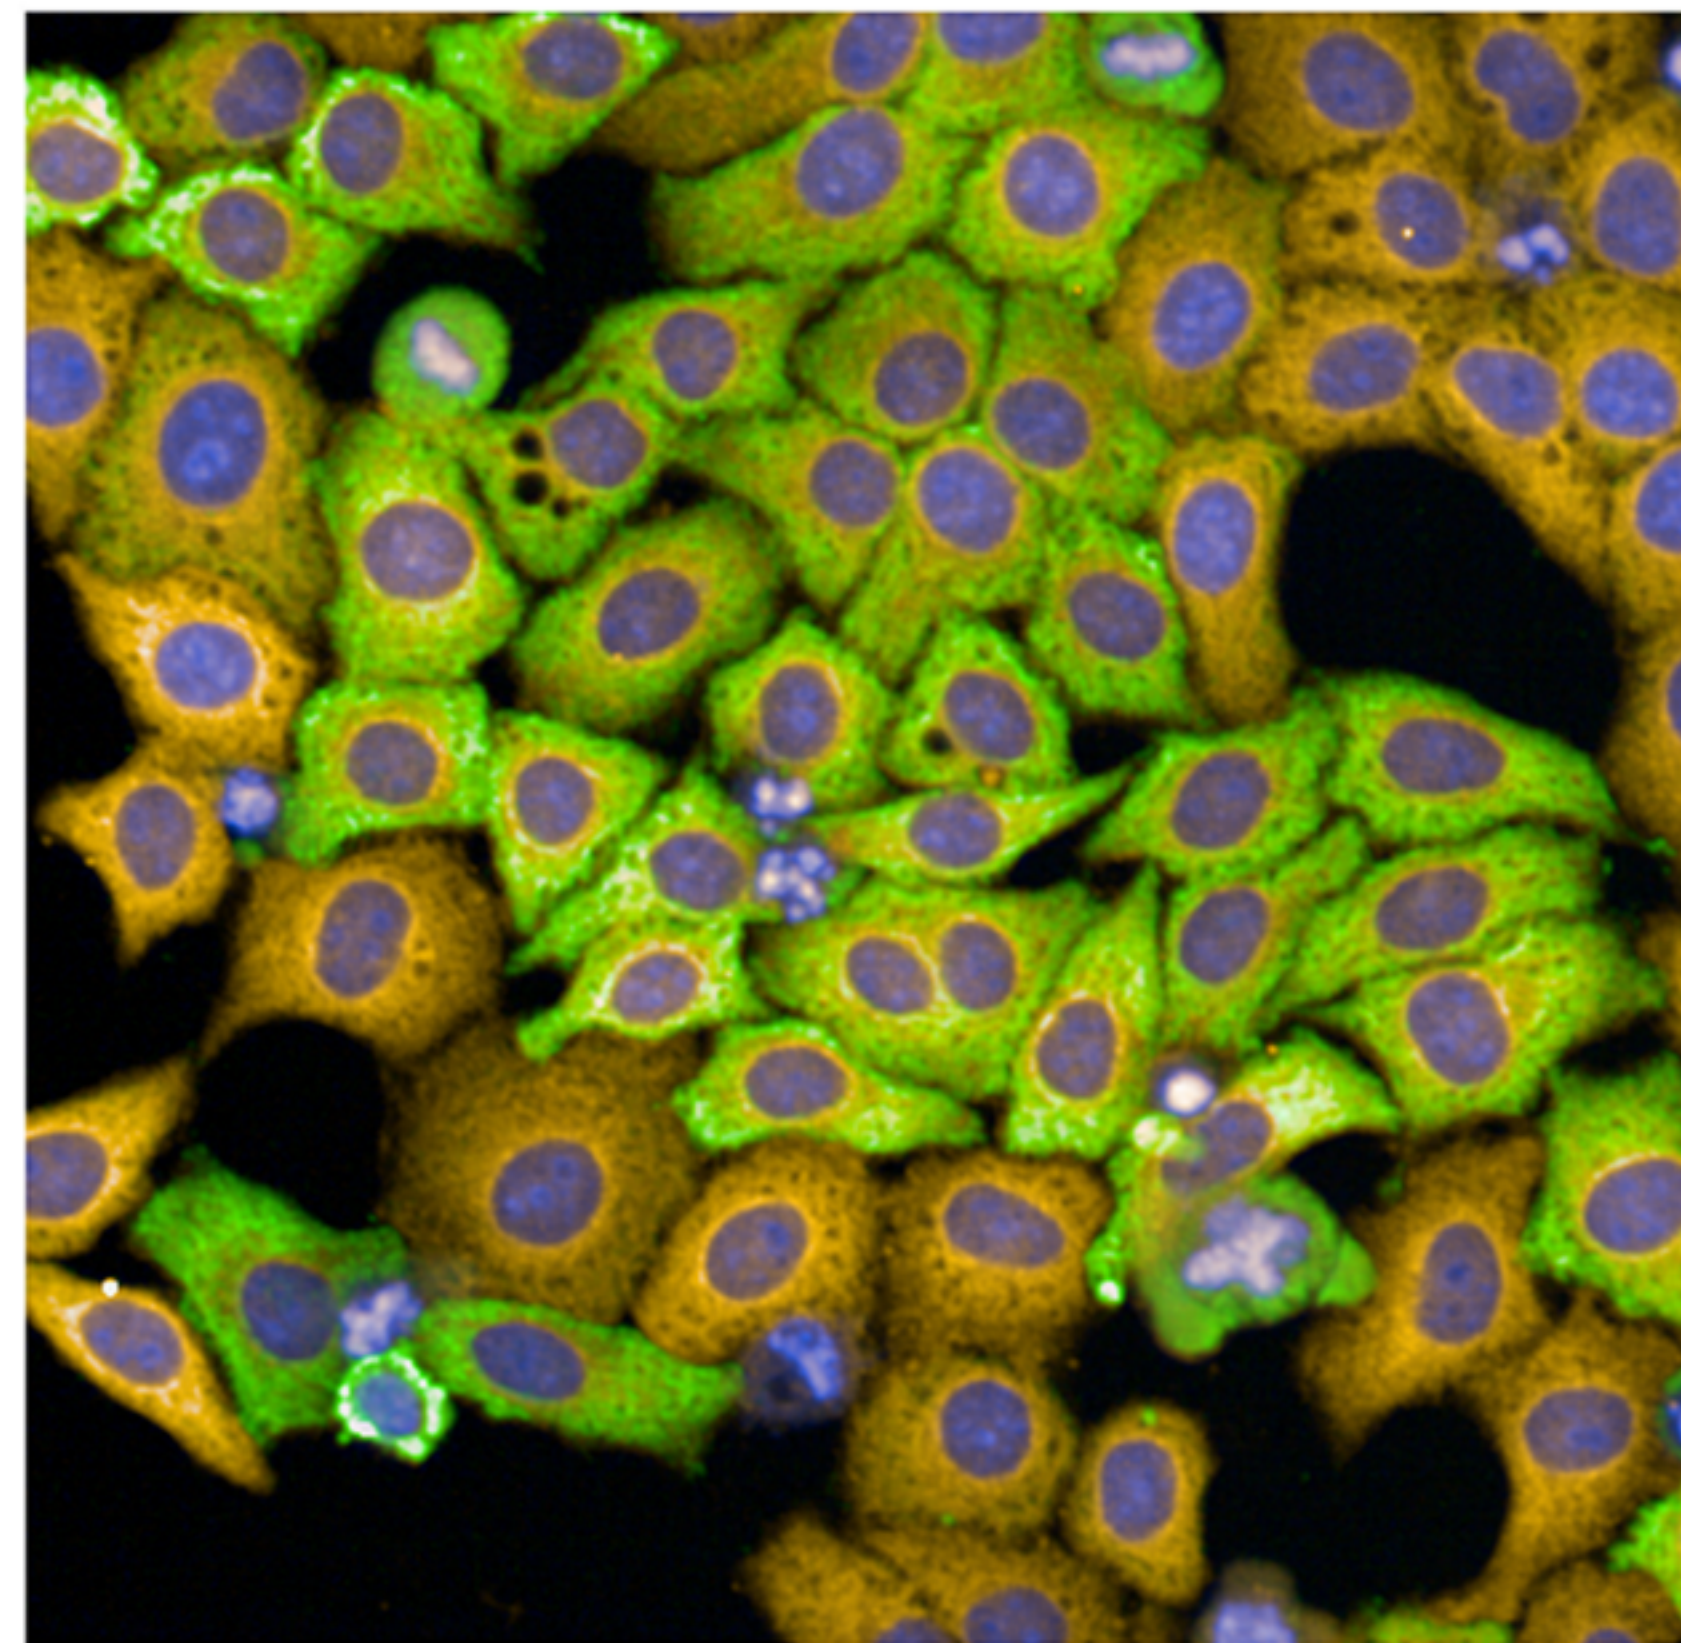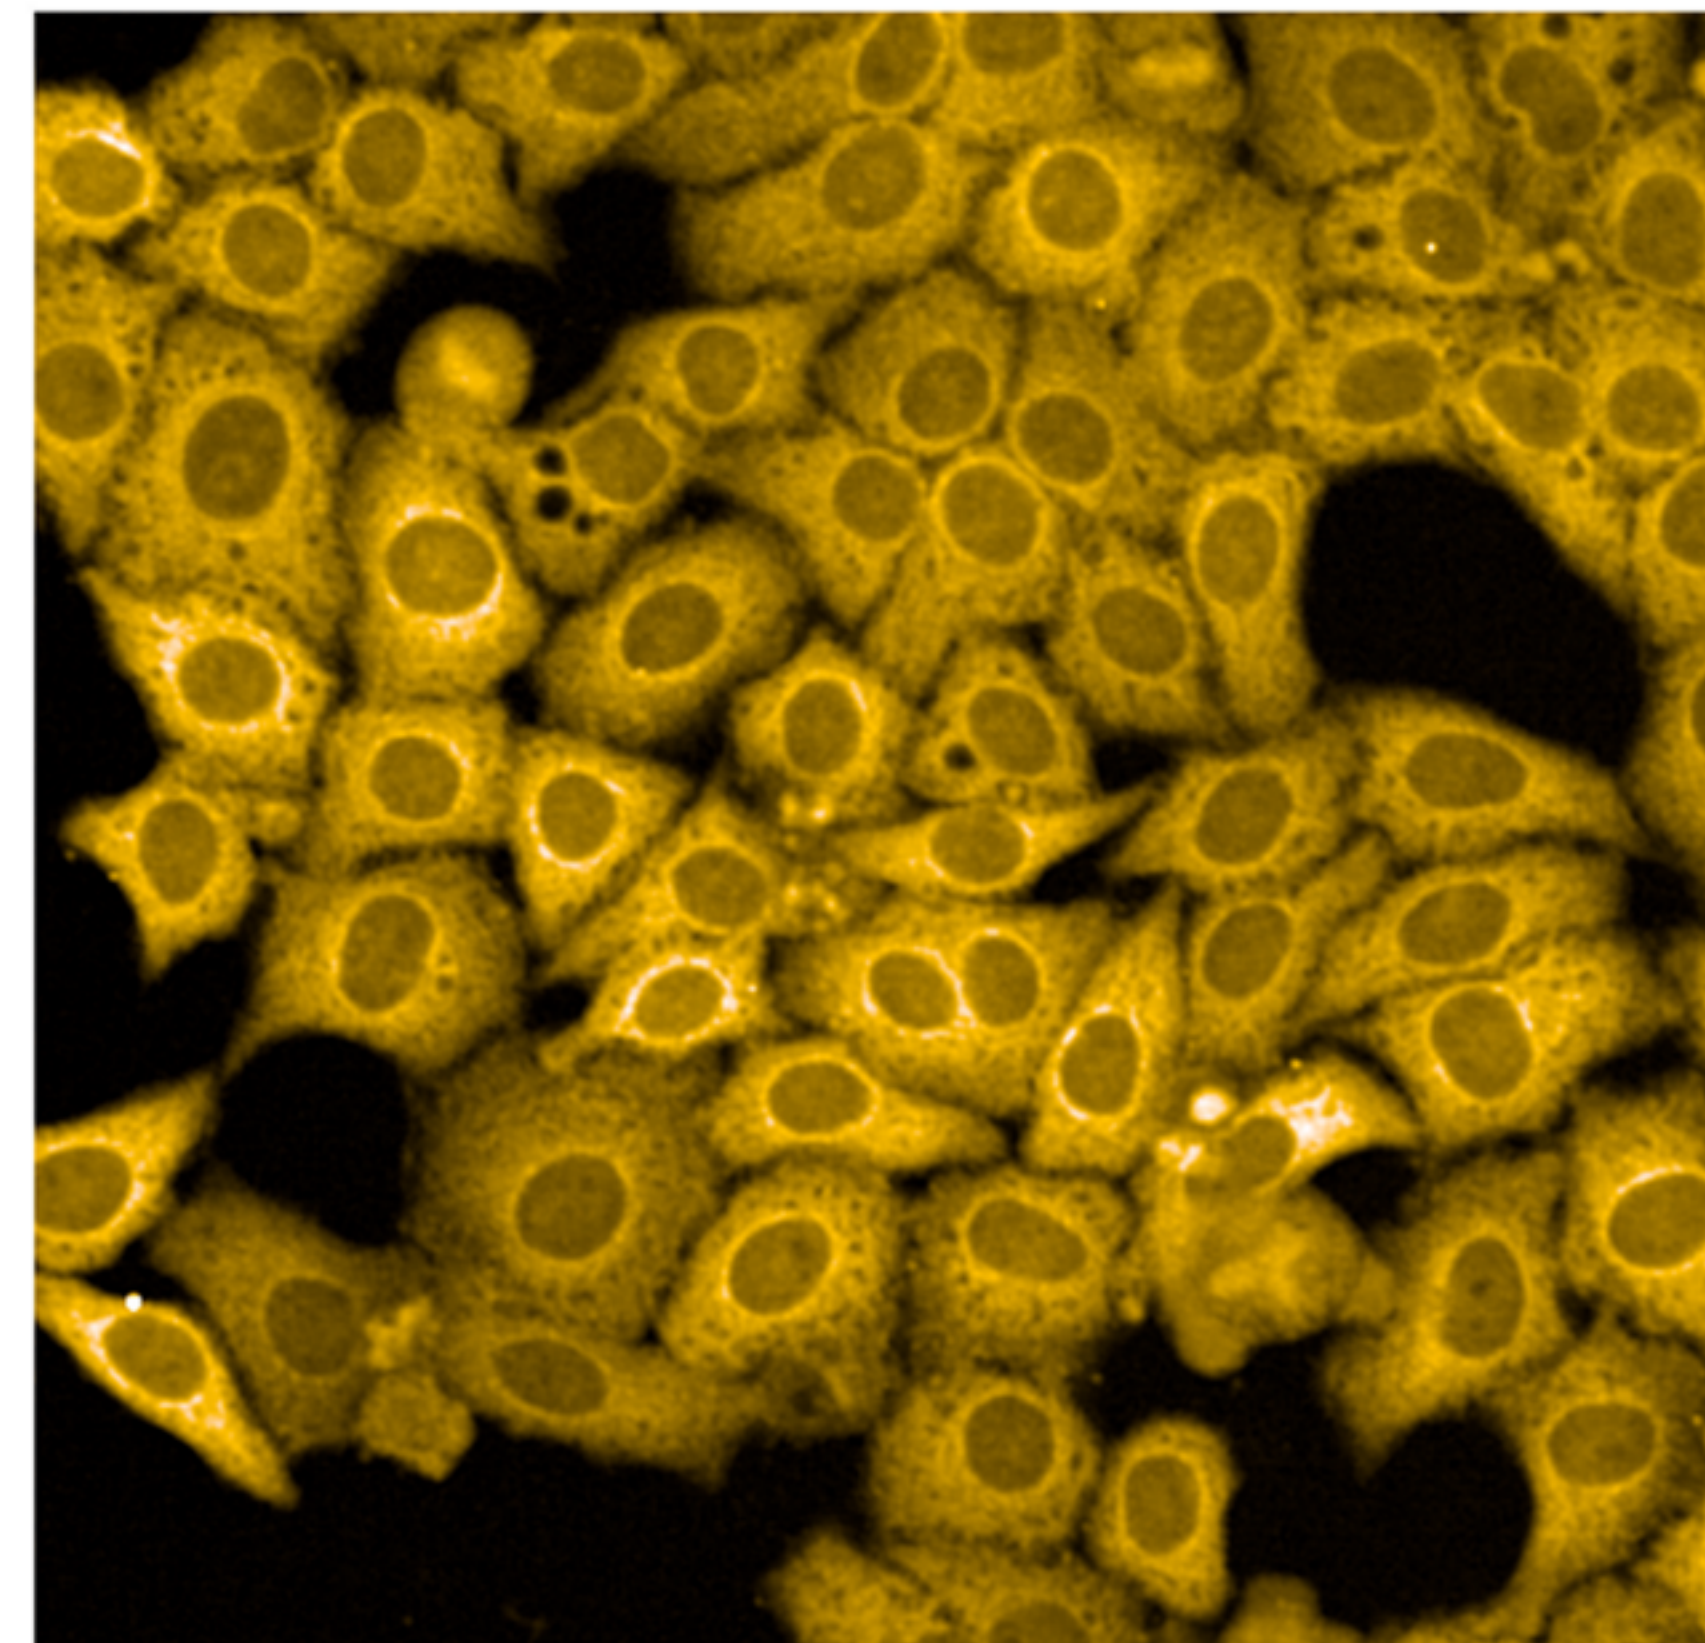

- 54 % of anti-YB-1 fluorescence  
in selected siRNA-treated cells

siRNA-2

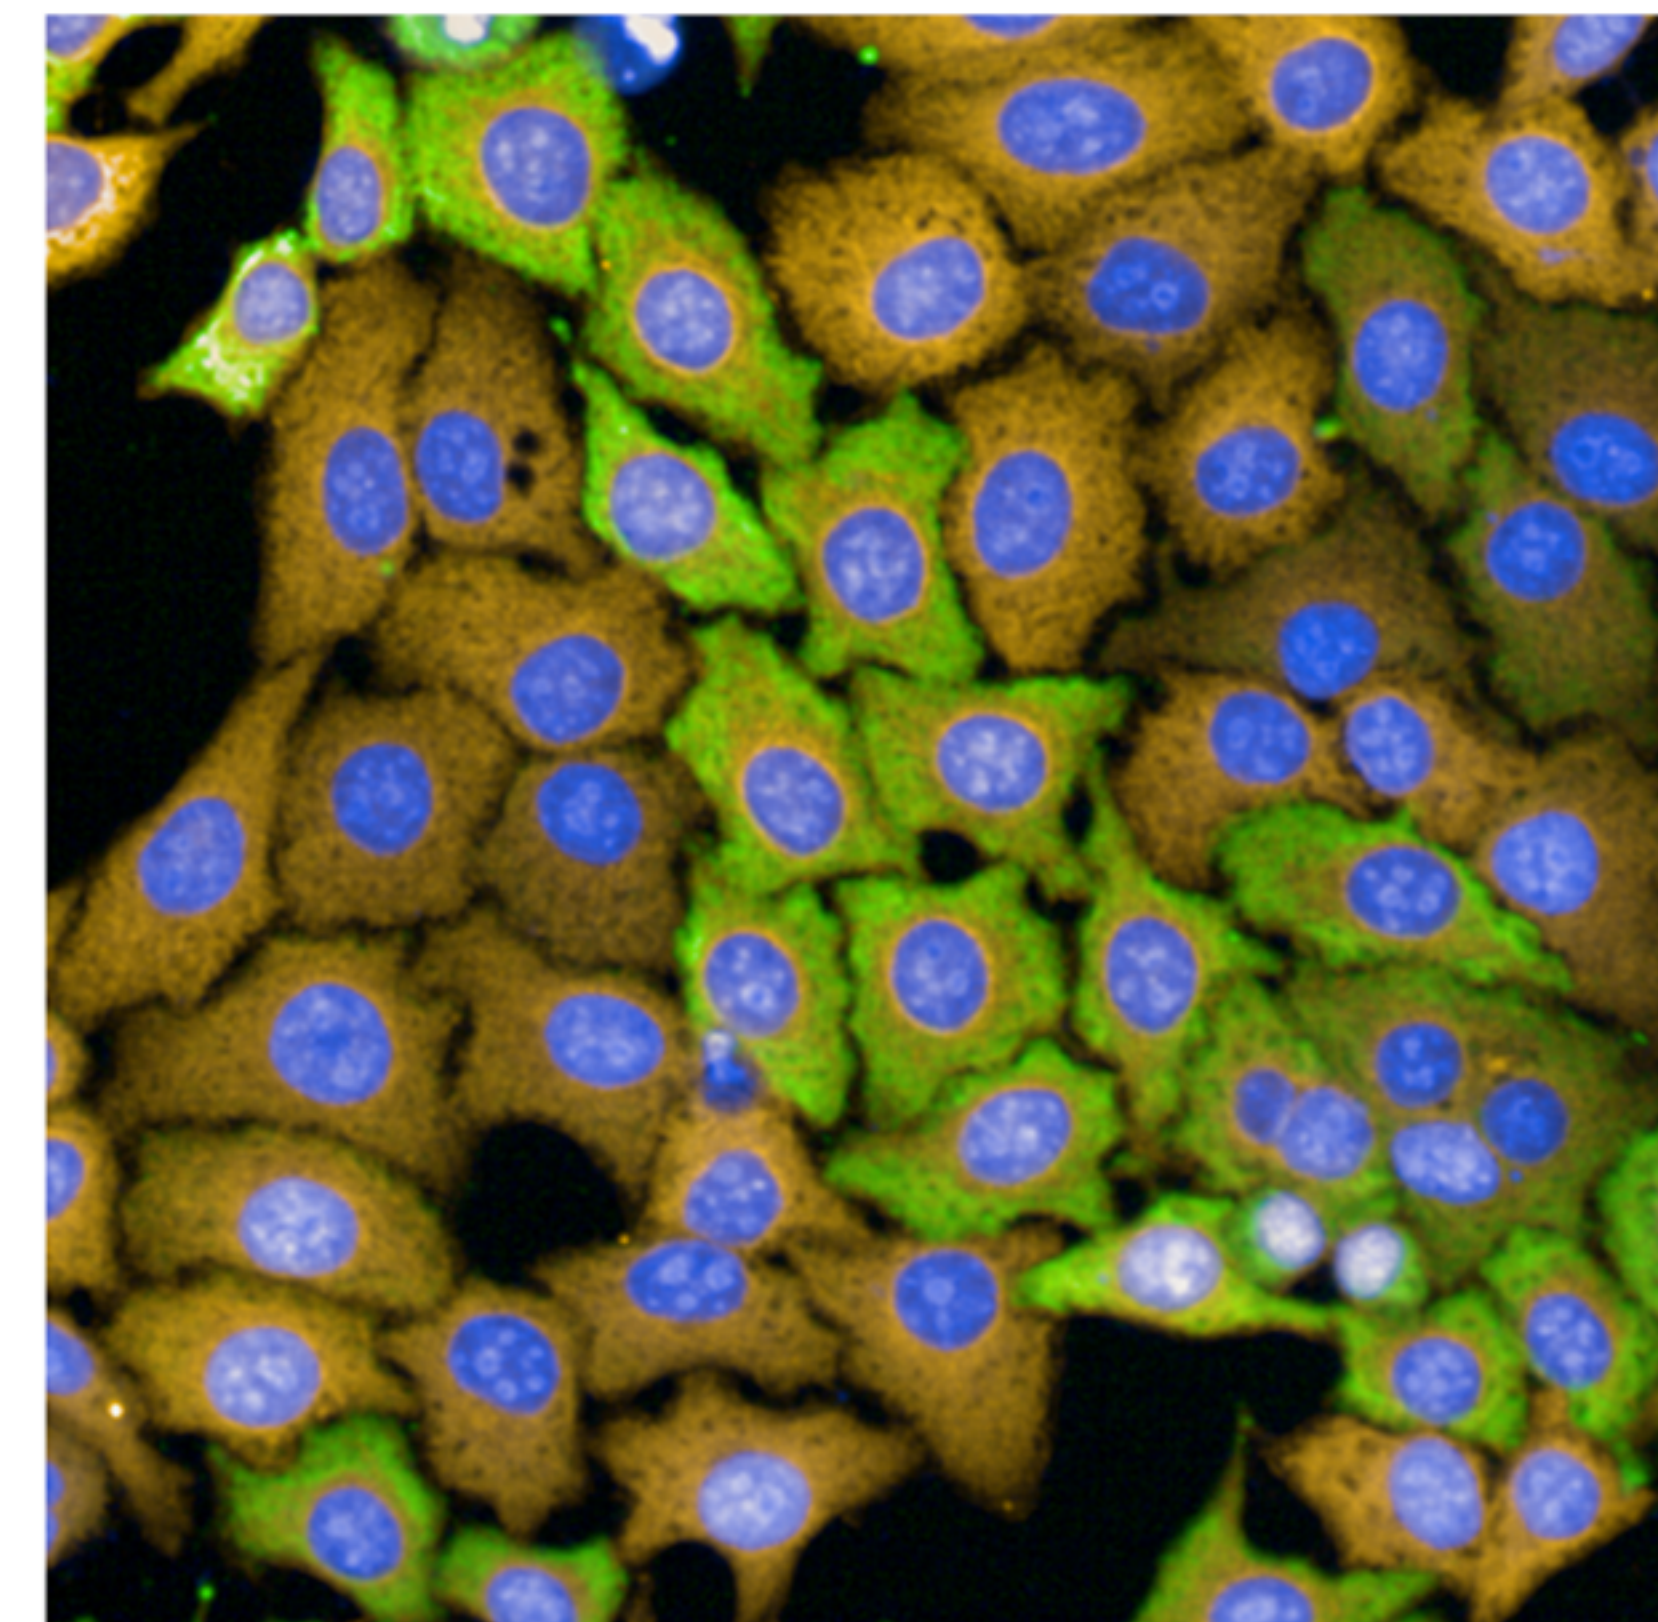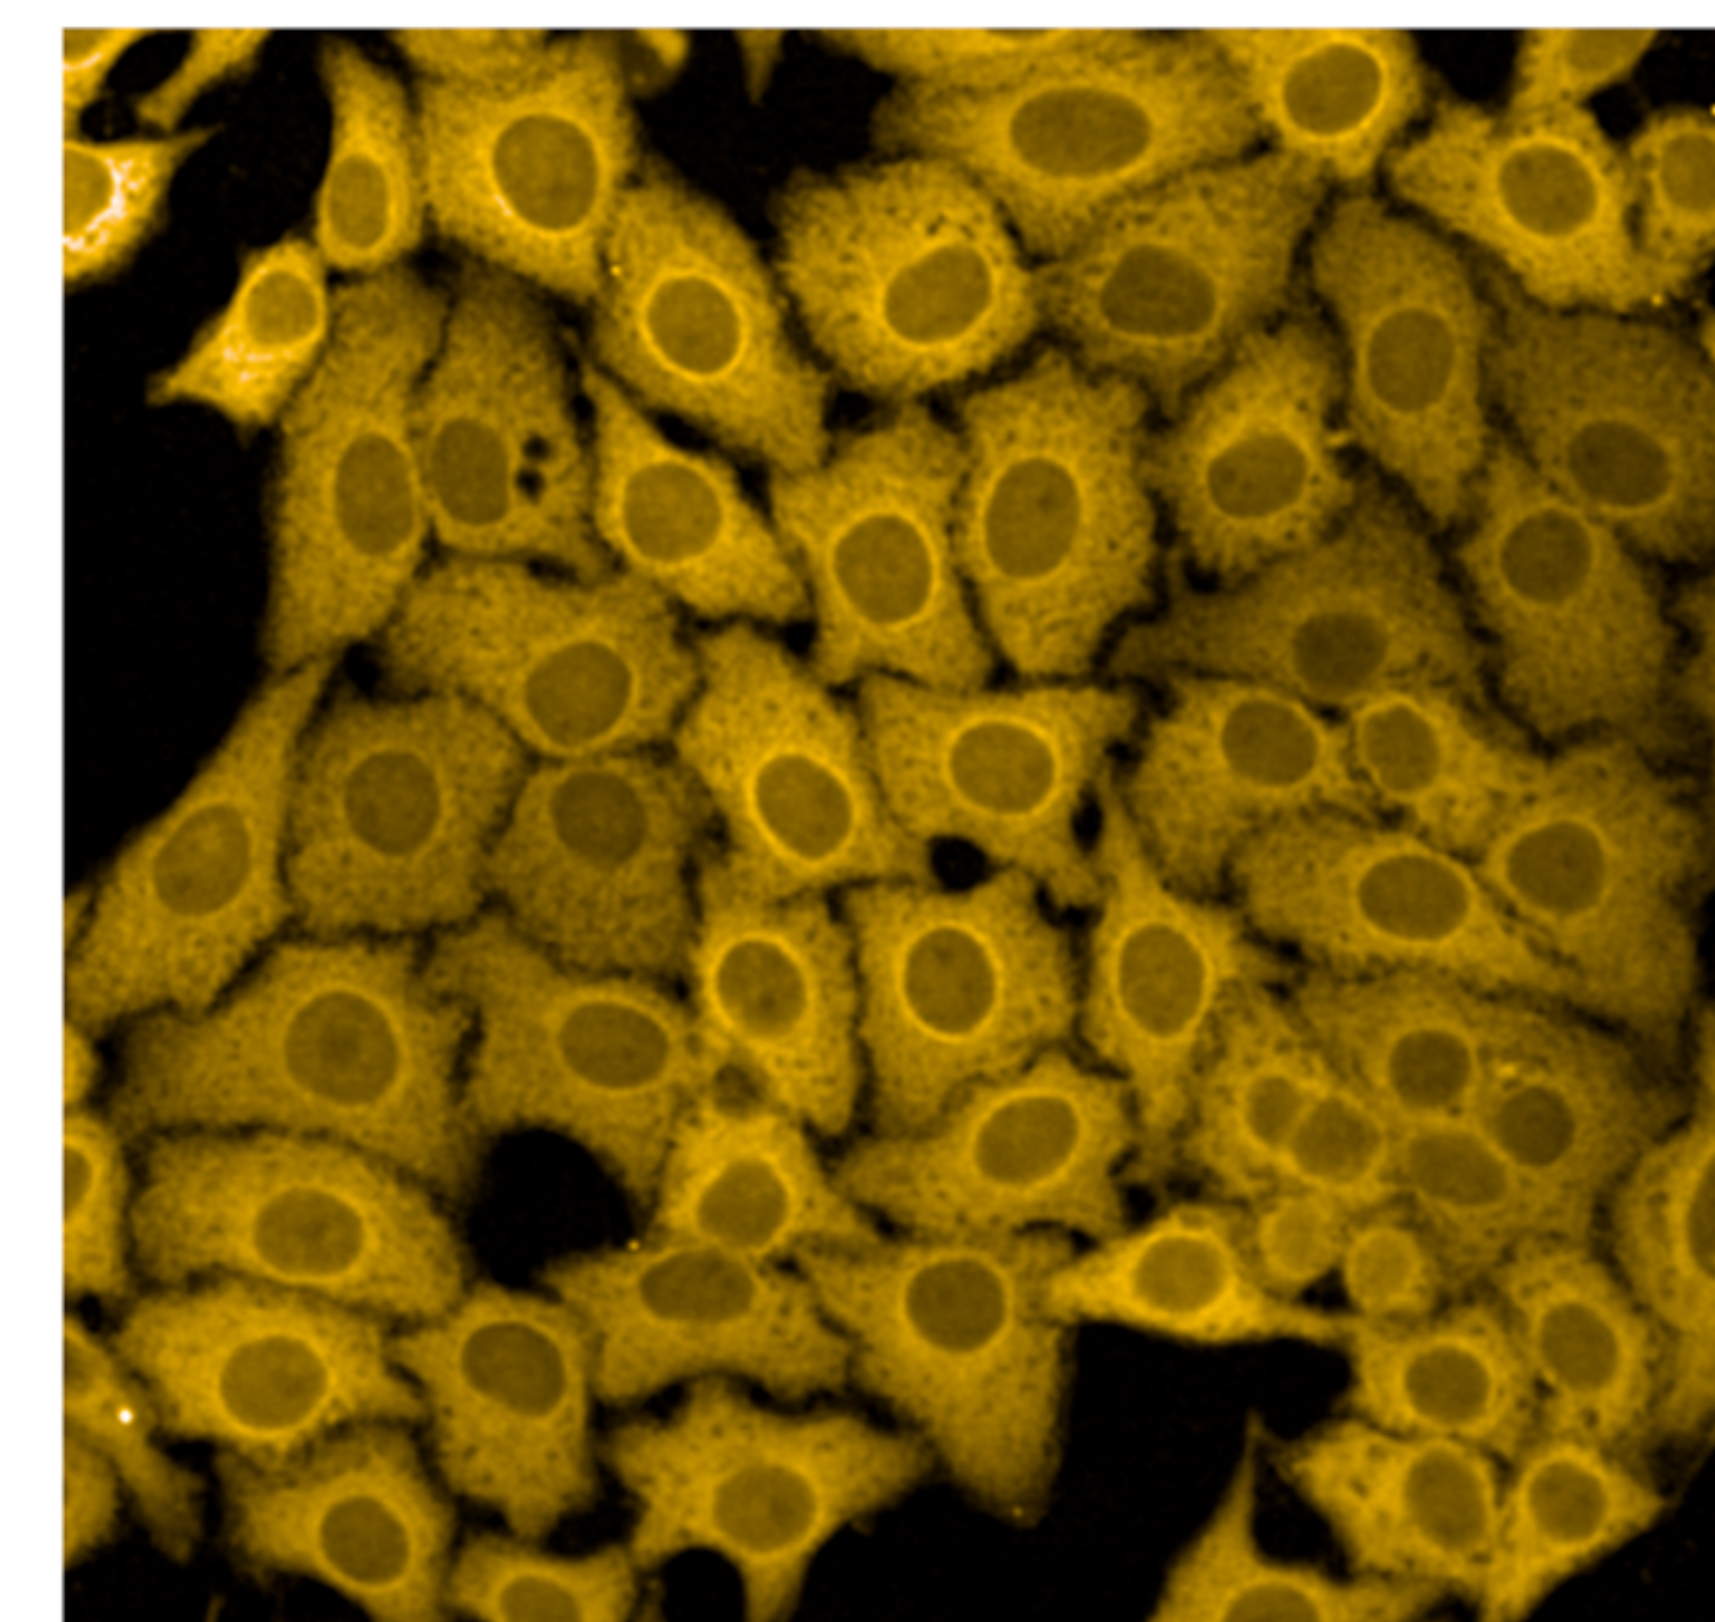

- 52 % of anti-YB-1 fluorescence  
in selected siRNA-treated cells
