# Supplementary material for: Targeting RNA:protein interactions with an integrative approach leads to the identification of potent YBX1 inhibitors
Source: eLife journal article supplement (doi:10.7554/elife.80387), 2023-01-18
Supplement: supp [file elife-80387-supp-v1.zip › elife_poa_e80387_Figure_8_source_data_1.xlsx]

## Sheet: Feuil1
Intensity Cytoplasm Green Mean - Mean per Well (anti-YB-1)	Intensity Cytoplasm EGFP Mean - Background per Well	Corrected Intensity Cytoplasm Green Mean - Mean per Well (anti-YB-1)
3161	287.3	2873.7	siNEG
2396	237.3	2158.7
3446	230.8	3215.2
3095	280.7	2814.3
3749	258.6	3490.4
3789	242.3	3546.7
1518	266.8	1251.2	siYB-1
1936	238.2	1697.8
1508	280.2	1227.8
1867	233	1634
1881	230.9	1650.1
1583	231.4	1351.6
		Plotted data
HeLa cells treated with siRNA and siNEG
