# Supplementary material for: Targeting RNA:protein interactions with an integrative approach leads to the identification of potent YBX1 inhibitors
Source: eLife journal article supplement (doi:10.7554/elife.80387), 2023-01-18
Supplement: supp [file elife-80387-supp-v1.zip › elife_poa_e80387_Figure_8_source_data_2.xlsx]

## Sheet: Feuil1
Distance between nearest cells (a.u.)
dmso	dmso	nira	nira	ola	ola	tala	tala	48 h
25.9186	25.5309	61.964	44.3198	47.9263	42.069	34.6377	12.7821		sineg	siyB-1
77.9987	35.431	48.4526	36.517	54.6096	39.5692	7.76871	36.3474
42.1446	19.8817	35.1488	52.0689	76.7376	43.6371	33.1349	29.3298
55.8523	26.3989	52.1539	36.5211	79.0423	48.3735	36.545	21.8339
36.889	30.2723	49.5146	60.4077	22.8046	73.3889	33.0879	19.5263
34.6217	36.0999	39.8323	38.5478	68.3082	45.302	7.3197	34.4481
33.5886	19.0895	19.5043	48.9514	47.282	62.1244	13.9972	27.4533
13.3458	31.5098	31.1234	58.3795	51.231	76.0498	34.5223	41.9582
25.5919	16.7077	30.0955	43.6062	46.4735	73.3168	3.85385	22.773
29.7189	34.6912	9.92384	38.5478	93.4931	41.1775	7.3197	32.7035
32.4585	30.9346	34.9673	43.2289	23.7676	36.6816	29.9364	37.1221
39.474	33.4046	6.24733	50.1142	43.3912	45.302	29.6331	18.6997
29.5963	13.2293	25.2176	55.1179	41.0763	41.1775	30.3094	38.6275
31.8677	18.7611	31.3585	31.8033	29.7284	32.9456	30.8863	10.7069
23.9727	29.0405	9.92384	27.6196	17.3387	86.7888	42.9405	16.4312							Neighbors_SecondClosestDistance_Expanded
30.8059	26.6568	34.9673	34.2575	29.7284	31.789	18.934	10.7069
44.2271	14.259	53.5639	31.8033	41.4827	34.8572	23.5598	27.4981
30.9964	14.259	25.8796	32.1685	44.1663	42.069	25.7587	10.1162
30.4027	26.6568	33.6685	29.786	34.5951	62.1244	38.8523	24.231
21.6829	36.1124	25.2176	32.2677	25.6804	42.1083	36.8126	28.0611
28.8739	12.579	30.7649	36.0943	35.8141	23.9712	39.7041	33.2287
37.6598	52.0973	35.1488	57.4656	23.7676	19.4495	36.8672	30.4036
26.8848	18.7611	38.7319	16.8131	26.3328	43.6314	27.5568	19.5263
39.41	35.7317	29.6201	34.7691	35.8141	43.0358	31.2939	32.8927
13.5633	38.4095	47.8136	43.6889	28.0621	45.3522	19.9225	26.1177
13.3458	18.1501	23.2163	15.3394	39.0632	49.4954	14.746	26.4949
25.8018	18.1501	25.1883	21.1982	76.7376	24.7856	26.2633	33.7258
21.7913	23.1486	38.0765	27.9304	72.9332	31.789	26.4137	13.315
25.9277	33.3559	34.7099	36.7373	23.4584	19.9986	11.5258	39.0094
24.3835	26.3989	38.2366	15.9577	43.3912	70.7892	29.6331	29.6267
23.4491	30.2723	29.4876	21.1982	78.5353	14.2633	35.1236	27.3076
28.483	27.6136	25.4316	13.4825	60.2916	34.689	29.9364	23.9164
58.8801	25.8191	30.7649	13.4825	48.4573	16.8384	34.5223	18.9509
19.7036	19.15	29.3567	62.5152	64.4138	43.0358	35.8429	6.77488
39.3991	25.0066	34.4938	18.7758	31.8531	44.1582	37.6082	16.5195
30.583	16.8792	33.0031	38.1419	48.9689	37.7961	30.3094	14.5421
24.3835	20.6171	7.38544	15.2405	32.5094	22.2769	35.7103	17.8612
26.6467	22.9528	20.8479	15.2405	51.5761	118.716	31.505	26.9252
41.0979	15.9229	23.2163	31.7476	32.2226	74.6308	40.2347	10.0898
22.8426	23.1486	5.03721	21.9509	28.6247	19.9986	40.815	18.6997
30.7908	25.6491	31.9105	34.0294	22.3723	29.6909	33.2231	40.697
33.951	13.0462	7.38544	27.0724	37.5912	27.1737	26.1402	15.043
27.9502	19.6592	52.1539	32.6364	104.128	39.4459	36.8126	17.3212
25.1247	12.6553	20.8479	34.015	29.0541	28.6619	44.838	29.3298
42.1446	31.4554	39.2066	24.6329	52.1391	29.6191	30.1382	20.6579
23.4491	33.2663	25.1569	31.8462	40.6339	32.1125	38.0067	19.4668
26.1909	14.0422	27.3643	36.0986	35.142	16.8384	35.7731	16.0491
30.6428	10.274	33.3909	35.994	39.8248	14.676	19.1405	15.7701
31.8677	16.7572	24.571	28.8452	11.9282	29.3174	38.474	15.5542
28.4156	16.7768	24.9349	31.7476	35.2916	14.213	44.4386	37.6959
29.9084	19.15	25.8878	30.6521	6.75925	15.1884	42.1089	25.533
28.0346	35.7317	37.0799	19.6122	11.9282	49.5306	26.1402	25.4286
19.1153	19.6592	31.1534	29.1464	46.0145	20.7418	22.6215	22.4939
28.9513	19.2625	32.2365	21.5441	12.7355	27.7103	33.4306	35.1598
39.474	21.1082	39.2805	83.8339	19.8568	39.0417	33.2231	31.1777
24.7897	20.6171	18.091	30.8318	29.0541	25.4833	33.5553	18.2308
15.8729	14.0422	25.1569	18.9258	42.1734	29.5635	35.4235	10.9825
20.1269	25.4693	32.3779	29.4609	46.9654	37.7349	35.7656	35.0558
38.4282	19.139	35.3035	83.3967	27.9345	25.7138	29.661	10.9825
59.4667	28.1593	32.6409	18.4296	31.7974	44.7724	38.3633	33.124
26.3492	19.139	16.063	29.9497	42.1734	27.2529	21.9192	27.1191
18.9063	28.7906	33.1308	30.4781	35.7291	45.3522	22.6215	24.9487
27.903	25.4693	14.2406	29.734	49.9408	16.3359	33.4306	36.8329
28.4115	25.7245	37.0879	26.4565	11.6198	14.6424	20.9203	16.8259
25.1247	33.9281	43.8102	21.5441	50.389	53.0933	23.4862	18.4203
32.9426	21.7224	33.0034	29.3448	42.1555	31.8121	21.1058	18.0763
27.8125	25.1006	29.3567	27.7036	38.1434	18.8543	21.1058	18.6049
29.3691	32.8279	35.6519	24.5732	38.6144	24.7984	24.8619	17.3838
35.4102	51.378	33.0031	28.8452	39.8248	14.6424	29.9513	25.3513
31.1738	28.7906	33.1901	30.4754	37.1643	22.6603	36.2107	30.7191
30.4638	17.272	23.0127	34.9259	52.1391	43.5478	44.9681	30.5187
15.1037	19.0459	17.9584	33.6885	36.6872	27.6807	47.8745	31.8672
13.6315	43.0914	24.571	40.5723	35.2916	29.6191	30.4995	36.1791
24.4351	36.5822	35.9545	42.99	30.699	46.475	50.8276	25.6061
42.937	31.6043	25.0065	35.3934	8.92924	27.6228	39.1393	27.1191
26.3076	26.593	21.929	32.2126	9.7118	51.4917	30.0083	17.1178
2.46705	20.5863	33.3909	29.9497	9.39292	35.6487	24.3947	18.0763
31.3078	20.5863	29.8179	25.3336	14.4844	26.4596	14.8163	27.987
23.2943	16.1829	33.0014	31.5772	5.016	33.03	24.3947	33.6985
27.8314	33.1837	16.063	47.869	9.39292	19.1875	43.4134	23.7037
13.7475	17.6212	34.2021	34.9259	9.7118	30.4788	44.162	10.8784
30.6083	19.6854	31.1534	18.29	39.2301	27.3203	26.8678	35.1883
26.3492	16.315	23.7542	76.9242	19.9686	28.2023	34.0725	12.3396
20.1356	28.7977	42.2405	17.8175	36.2017	43.421	15.7474	13.6245
26.4751	27.1989	29.8811	21.0014	39.1708	28.9686	29.1971	17.49
26.3463	19.6854	33.0014	42.99	25.3344	43.8267	30.6576	24.7404
19.6897	24.508	43.5721	29.3448	41.4671	35.4927	15.0588	36.0304
21.4263	15.7153	34.2021	27.7036	39.1568	30.5988	33.2455	40.0905
24.4551	34.4621	33.0395	27.0043	37.7665	37.7349	37.2021	11.146
30.0038	20.7227	42.6648	18.29	30.63	35.4581	30.0083	38.795
27.903	13.2636	40.8376	21.7537	32.0587	29.7298	31.4004	34.0883
13.3975	17.6212	35.4995	15.285	38.1434	27.6228	35.5708	26.7071
26.5525	19.3756	39.265	34.2352	21.3075	19.1875	28.2511	17.9418
24.2446	25.7901	34.6069	26.8319	34.3858	40.0967	24.8181	25.0497
11.8406	31.1101	30.6607	27.7191	43.0839	21.9191	30.1229	15.6681
28.4115	26.0616	25.7472	20.6435	12.7034	47.5298	48.1179	30.5859
26.3463	23.4447	29.3845	21.7072	41.4671	34.2329	33.4952	18.6049
27.5495	18.9507	55.0385	33.6885	22.3437	19.3964	33.4952	22.8542
26.4212	27.5986	38.1688	35.4695	40.8091	32.5574	40.4521	44.4951
22.9701	30.8393	35.4432	25.2227	32.3688	28.9686	39.3285	33.9513
28.4608	19.1149	23.9267	35.4625	14.2281	43.3806	37.4149	25.0497
30.4638	31.6043	39.7624	29.4407	9.86785	37.4849	11.2828	38.0555
23.9756	29.0402	34.1661	38.4112	53.1466	37.4849	5.96687	11.146
33.0403	17.9528	23.9267	30.2544	14.2281	33.4954	11.2828	32.1952
13.3975	31.1101	32.9834	18.0191	39.4681	15.9172	15.5657	27.4714
34.9227	52.8624	25.917	23.3473	36.7314	30.5988	30.0056	22.9393
26.3076	38.5173	30.4348	25.8233	48.9648	27.1073	11.373	10.4792
25.2467	15.9874	34.8509	33.731	46.0916	15.519	28.7908	32.5723
26.2545	29.7017	28.1561	21.2704	31.8171	40.0967	15.5657	22.8542
24.3569	21.0716	40.2565	31.952	22.1324	28.3096	36.2153	40.0855
17.0213	18.2631	29.8811	22.3331	27.8357	15.1866	30.1229	30.0512
31.2375	21.5313	18.6152	9.14016	21.3075	29.7298	30.0344	31.5859
26.7907	14.1347	31.7043	22.1753	27.6919	24.6213	9.0991	13.628
26.1944	38.5752	25.2101	18.0191	35.0974	15.3749	22.3375	28.89
25.7954	15.4063	16.8973	4.93571	22.3437	16.989	28.2511	26.9633
23.8353	30.6075	43.0082	19.1919	14.657	40.4419	9.0991	42.8774
25.2467	14.5358	25.5942	9.14016	40.9515	34.6141	46.7096	28.8425
31.5547	23.9391	44.5939	14.5323	17.471	37.7395	16.8884	38.2215
18.723	17.9199	8.75495	26.0976	33.0422	32.5574	36.4243	23.6407
9.56676	26.3873	17.5443	21.2704	39.0094	20.1555	56.296	36.5911
42.937	31.8027	37.4403	7.67213	18.192	50.0586	35.3342	26.2371
21.1701	15.4063	30.1938	28.3613	50.7484	34.2329	37.6172	31.5859
34.6453	33.6735	33.1825	18.6684	28.4527	43.37	35.311	29.0277
25.1859	12.8059	17.5443	21.0738	29.3627	50.1612	27.0485	24.7547
17.0213	27.426	43.5028	42.8472	34.1009	34.6396	36.5177	30.099
49.5384	21.7066	8.95208	29.9207	29.3575	33.7646	31.7388	30.208
21.3747	31.6862	34.0384	31.7412	18.4283	26.2396	29.4416	23.6407
30.6644	25.0031	34.7178	42.8016	24.7367	32.5564	27.0485	11.6625
19.9598	12.9345	25.917	14.5323	31.3445	24.144	26.1906	30.0512
30.5055	17.9199	11.8643	15.493	30.8717	28.6317	9.6185	32.2757
61.2516	15.2974	33.0643	31.1109	44.7064	42.5362	11.2291	7.14394
16.0471	12.0884	8.95208	34.2853	33.9196	41.8523	32.4742	36.4483
17.9764	31.1992	12.7691	25.2651	34.1009	27.9588	39.1549	44.6281
31.6504	39.6986	23.2953	34.2043	39.3368	45.9595	39.3285	40.2896
23.2791	34.366	33.9541	22.151	24.27	39.3031	28.7908	30.3039
25.6598	26.7006	11.1432	26.0976	25.6854	28.6317	11.2291	10.1302
41.1369	21.7066	50.1972	27.3135	63.4794	31.8592	31.4237	25.753
35.7147	23.9391	26.8379	22.3331	30.5539	33.3122	17.8716	27.0409
42.4158	41.8711	37.7217	33.0841	28.8652	41.6085	39.5864	11.6625
16.0471	38.199	17.8152	14.2654	14.6315	42.5362	28.7072	13.5911
25.9018	33.8098	20.4028	34.3691	26.91	37.981	26.5147	21.0752
35.3779	19.8452	25.8271	12.0021	24.9928	43.7197	39.3874	19.9406
12.1908	32.1095	42.4001	11.4828	47.4829	38.775	15.212	24.7547
32.0166	29.9236	35.0704	36.6778	20.8298	39.7218	40.8713	16.8938
19.3533	20.0126	17.7222	47.5731	20.0205	31.9504	26.1464	34.414
28.7225	25.9231	56.0757	18.6684	24.6012	39.378	34.8745	14.1393
18.7738	27.3437	26.5552	29.3946	34.6929	44.7215	35.3832	37.1287
33.7843	32.802	37.4403	21.6861	31.3445	34.2761	17.497	30.3039
16.0222	28.6009	22.0166	38.762	45.2449	58.9993	17.8716	24.7274
26.9792	25.2016	12.7691	23.1839	22.9412	35.9648	33.3378	23.8726
32.2387	25.9231	34.1192	29.9207	47.0815	40.3803	33.6313	27.463
16.0222	24.9366	26.5552	38.5409	26.1746	49.2838	29.4416	16.8938
18.6431	22.6825	30.2813	14.2879	34.4482	48.1957	20.6482	30.5495
21.6264	35.5026	25.8271	31.0503	24.7822	35.0762	23.9844	39.336
22.8832	23.9372	28.4126	35.7409	22.7924	20.7247	8.84795	45.7079
28.2178	29.071	28.8763	20.5687	25.6854	11.04	26.9157	36.5911
18.5807	32.5034	30.9305	42.3601	17.9604	34.1451	36.8015	34.3596
31.8748	17.4329	24.7882	18.9013	42.5554	31.9504	8.84795	15.0294
28.0372	23.9372	32.8028	26.497	18.7359	39.7218	29.4884	15.0294
22.5194	27.3437	41.2427	32.2561	24.7822	36.4643	31.1477	23.2503
21.9702	29.0038	26.2165	37.1058	33.6205	20.7247	28.9103	30.5495
22.5838	25.272	25.1998	28.2701	13.2685	33.9803	21.9946	32.695
28.2178	24.102	29.444	23.2579	31.1222	44.1196	28.7072	30.3797
47.4184	36.219	35.8852	25.1422	35.3976	61.9446	36.5177	9.16446
28.764	33.7806	28.8899	28.5515	30.4911	46.3859	28.728	28.83
32.0134	30.3869	21.8694	38.8476	17.9604	18.5815	36.2714	15.8279
33.83	33.7806	23.2579	35.3274	39.231	25.7206	32.089	20.8583
16.6573	57.1501	35.8192	24.5372	43.3965	39.378	26.1464	17.2408
30.553	47.0354	30.2813	45.8316	13.4176	40.4335	36.9136	46.7569
30.553	24.5439	26.3865	39.2252	22.2751	36.4643	37.6849	32.0509
33.9909	29.043	28.8199	20.5179	31.4002	23.8229	42.3868	23.2503
34.844	33.2383	44.8818	29.3946	17.3403	23.8229	25.0427	9.48093
24.6148	30.3869	35.0704	20.5687	35.5659	30.4396	26.9157	26.6471
28.8772	27.8836	38.5557	19.1966	26.7411	31.36	17.5642	15.8279
27.6725	32.628	34.5698	32.9612	41.4371	32.8486	12.5406	31.7132
33.7843	22.2201	31.2694	39.4199	35.4534	24.9834	29.3432	51.4231
22.8356	16.0123	33.1963	24.4163	27.0521	46.974	28.9516	36.889
31.4033	23.0434	15.3707	23.8767	33.512	34.1451	23.9844	33.2861
30.3376	16.0123	32.6813	32.2042	32.8522	25.371	26.3543	33.7664
22.3202	23.4616	28.4126	20.756	35.3976	25.5491	29.3969	38.8943
23.7703	30.3139	20.6947	16.3279	41.8158	31.36	26.2629	32.33
28.0372	29.0038	33.0663	21.1669	30.4911	33.9803	22.6072	28.0989
32.1994	18.0846	28.5779	35.0713	53.2571	66.6699	32.089	25.3817
27.8018	11.0478	33.9859	15.6674	35.4514	45.3545	26.3543	38.4231
22.1559	29.284	38.5557	16.0347	26.6397	25.5491	31.1477	29.3192
33.2695	36.2099	34.5249	27.5364	32.2509	29.6449	17.5642	31.548
26.1886	34.6091	37.5739	23.8767	28.8984	30.2889	21.7226	28.2295
28.2428	35.6814	16.0346	38.9188	35.9458	45.3753	25.7908	27.2613
31.3828	35.5485	19.0064	23.1629	44.5706	38.0436	31.5252	28.8599
20.8147	28.2988	28.8199	27.8543	41.2373	37.4139	42.6851	37.3114
29.2446	33.7272	25.1463	24.4163	30.9405	18.5541	19.6621	36.889
27.2309	18.4138	32.2325	28.7739	32.7961	25.371	26.2629	37.7522
28.764	24.5439	37.2904	12.6216	23.0398	33.8775	17.8282	33.2312
34.3824	24.8251	28.6728	37.7322	30.9405	28.1353	23.3259	43.077
35.1378	27.5243	39.7608	33.3137	19.7948	40.9643	33.4723	25.9201
24.4157	20.1811	19.1447	14.997	38.4434	33.2558	27.5065	32.8742
24.278	28.8615	27.7251	20.7824	38.5218	44.4769	22.137	70.5382
60.0626	41.0958	22.0514	25.106	41.7842	51.587	17.8282	28.2295
24.4504	28.8985	37.4964	32.5456	42.2745	31.9499	22.6115	31.1944
33.4436	30.3139	20.6947	15.6674	31.6629	33.6553	25.7908	33.2312
26.1074	22.2201	15.5694	14.8871	37.6757	38.0436	18.627	28.8599
26.3264	27.8836	49.5272	21.1669	19.9695	36.9644	32.9696	26.688
30.3376	33.7027	40.1379	21.5366	34.5501	64.6523	18.5935	33.3951
24.125	29.0431	33.0663	28.95	31.6629	40.7054	17.977	26.0427
31.2723	33.7163	31.757	33.7385	40.9291	35.4637	22.137	38.9531
22.9808	47.0354	33.9859	16.0128	27.1252	51.7498	18.573	31.3142
40.2816	18.4138	23.7278	16.0128	41.9025	28.1353	23.2729	14.9392
35.7633	28.6827	29.1611	21.0652	22.6771	38.9903	19.174	36.15
34.1496	29.0299	25.053	19.2793	52.6525	34.3343	21.9835	48.3307
51.5479	75.7283	41.2427	32.3167	33.9805	54.8679	26.2748	21.4374
26.5229	41.7953	27.967	15.6025	42.2879	34.3671	29.7769	38.0661
22.4289	33.0942	40.2103	33.3137	47.3939	26.6777	22.383	28.3331
31.4033	24.6801	24.1609	15.6887	44.3063	21.6539	28.697	11.9567
19.1331	18.907	24.3073	16.4916	35.8614	44.3776	22.383	40.3695
28.4882	22.5221	18.2711	23.4941	37.1566	43.8486	18.1674	27.5075
48.8546	33.8814	13.5419	27.572	31.0489	39.2184	18.627	43.077
32.8986	34.6091	19.0064	30.6114	19.9695	45.2831	34.8452	21.4374
21.7266	20.0694	19.0079	21.167	32.4551	42.5853	20.6027	32.8519
21.5671	50.5386	24.5649	36.4955	33.833	46.836	35.7261	16.566
40.481	34.0685	39.599	27.572	42.2745	69.1679	17.977	30.2402
26.191	27.4398	34.2736	16.4312	30.0826	38.1623	28.5281	41.228
23.4471	31.2121	30.9892	11.1099	32.2509	34.8026	18.9559	12.1573
29.621	29.2901	29.821	15.6887	9.82602	22.7244	23.3871	11.9567
63.2092	24.6489	29.1611	45.524	35.4642	26.6777	24.259	84.0448
7.92627	39.8062	20.7628	38.5773	31.0427	41.6154	12.7697	44.3045
10.1553	12.7651	17.2485	18.4812	33.9805	23.7834	17.8141	16.566
10.1553	23.4731	29.3154	16.7555	27.1252	36.7768	26.168	36.5994
45.504	28.7089	28.6755	13.1785	9.42148	39.2917	26.2748	25.4791
25.6797	25.3631	34.9569	18.5022	9.82602	24.6364	24.9379	25.7128
26.2542	25.3631	40.0089	24.9498	42.6332	23.7834	36.1546	41.2674
23.9344	32.1616	23.6384	30.2831	33.2967	89.9128	22.4773	25.4719
38.0457	15.633	22.0514	19.2793	20.9917	63.5105	21.1409	39.3512
14.3971	26.5763	24.1609	30.2393	32.074	21.192	27.3487	40.3695
25.5942	25.8798	32.9677	33.7385	24.6875	40.3053	17.8141	34.0358
18.4306	54.1695	23.7278	22.1785	31.1757	64.6523	15.5462	27.7119
34.5565	13.9222	35.614	18.4812	39.0739	20.8364	26.6442	33.3898
26.1074	33.9675	21.7531	31.351	44.4029	39.2917	27.9433	25.7128
28.1475	38.2885	27.9306	34.8932	38.5218	17.7135	18.9559	34.0446
26.1436	24.327	37.3723	31.1111	37.5476	48.4865	32.8696	39.992
24.2845	21.8604	26.7369	37.7322	33.3365	19.1502	37.3601	33.0203
31.0907	47.0657	26.0832	16.7555	24.0657	42.5853	24.1679	55.8185
37.6881	28.2436	12.5867	35.5825	33.2243	33.929	22.6323	30.0737
25.5716	23.167	40.1998	39.9526	45.9732	48.0584	23.6104	30.0737
17.9311	34.2796	38.1859	16.4312	27.1141	30.0196	31.3721	40.0612
21.8629	27.4398	26.754	21.0062	36.1335	11.4733	24.0125	29.8825
25.8275	32.3592	25.5184	24.2017	32.4551	6.62019	19.4873	39.3512
26.5229	31.842	17.2485	15.3822	46.2836	40.3053	26.9725	42.4076
21.9624	30.4899	39.5903	41.5328	44.3481	19.1502	30.9198	34.5306
38.0457	18.5989	33.0993	27.0627	33.3365	22.394	29.54	40.5666
35.5294	26.3846	46.2391	20.4648	44.1512	11.4733	28.6306	10.2422
26.6893	28.7674	30.2557	18.0155	34.1884	60.3276	29.3031	38.6109
22.2472	18.7053	23.1199	22.7815	33.2243	34.7655	43.3778	10.0617
27.1815	31.4215	34.4756	21.0013	33.9739	30.0196	24.1679	10.2422
25.5716	15.3239	40.7828	34.2977	32.9727	50.4165	27.0428	60.1829
22.1323	20.178	16.4921	31.3636	31.383	71.7864	35.8711	26.4539
23.5075	31.34	46.2493	20.2704	33.2967	47.0462	25.2337	55.167
28.1292	19.293	23.6384	20.2913	33.0162	47.0462	31.5666	55.8185
24.1064	28.2436	21.5641	27.9012	36.7418	65.16	30.2671	32.5835
15.1516	15.2429	22.5698	22.6662	39.6261	30.6535	27.0428	27.5898
22.9311	11.1469	44.349	29.7538	29.2716	42.5796	23.0821	29.318
27.3052	32.3434	23.6702	19.0958	32.6786	52.6142	32.3647	27.5898
24.3564	28.2852	28.1458	20.4347	42.7878	50.4536	30.9198	25.3444
26.3878	30.22	27.1049	34.0106	18.5261	31.3537	30.496	17.7808
28.4217	22.4352	30.0226	17.4509	40.5918	31.3537	37.5141	26.2689
16.7557	15.3239	34.4756	24.8861	40.4984	25.8335	39.4764	22.6082
26.9654	48.6899	33.247	42.2943	38.0661	27.2699	30.278	25.2404
23.8213	26.2398	35.1629	30.493	39.9253	29.5698	29.4634	33.1971
12.3194	27.0673	34.2736	29.7538	32.8858	76.7872	30.4435	31.922
34.5565	39.1864	26.2879	14.6884	31.0966	40.8337	38.9814	26.4539
24.8078	28.7469	30.2412	15.2683	43.7633	53.6864	27.0829	33.6212
40.481	23.7531	37.2469	18.415	32.6786	19.5864	149.883	21.8655
25.0706	35.955	37.8491	31.7779	32.4109	48.1495	27.7348	39.9187
50.6133	28.6848	22.5698	35.1609	33.2682	25.8335	30.496	39.978
12.2015	14.1623	36.7406	20.2704	35.757	39.3741	27.3136	28.6852
52.4049	23.7531	32.7545	25.0319	36.4193	41.3906	35.996	25.3444
36.2542	13.9007	34.5286	24.287	31.383	52.0051	78.9437	22.797
45.504	14.7998	29.8506	31.3503	40.9265	29.5698	30.046	48.5635
22.097	20.5861	36.2558	19.0958	33.0162	74.2763	27.7348	39.2623
26.3878	14.7998	29.3217	26.6551	11.3667	47.9922	30.464	46.789
21.2856	49.3733	35.8799	21.1331	33.5445	52.6257	34.6453	18.5077
26.6893	30.5682	35.4576	14.2833	26.5125	44.9725	29.0848	14.8826
19.4186	14.6745	23.5608	14.6884	42.3632	19.4828	23.8921	14.8826
37.6881	13.7408	34.9353	35.1029	25.3772	48.9228	29.7068	43.7579
26.6507	34.6337	29.8599	48.3152	31.6173	40.757	23.8921	24.679
16.2752	32.3434	29.0473	26.677	9.9954	21.416	26.9078	33.8987
27.0334	36.6483	32.0776	27.6731	34.2108	39.054	23.8686	38.0954
29.3647	28.2852	39.5903	15.2887	38.5255	14.328	83.8437	34.8193
26.1114	25.7584	31.7066	33.509	36.2883	13.9283	19.0375	21.8484
26.9654	12.6289	24.1243	26.9203	38.0591	21.416	29.9849	30.105
22.6558	26.1647	19.7322	32.7344	44.403	65.8016	32.9979	24.3317
22.9042	16.9803	29.7803	14.5593	15.9566	39.054	48.7684	40.9143
32.5805	17.6679	33.89	24.5645	39.8125	39.1825	13.6037	48.5635
27.3052	18.9709	29.5088	26.5996	39.6261	10.7276	19.477	36.7772
22.7086	17.3294	29.7577	38.5638	11.3667	48.1495	36.3582	33.1604
32.5805	20.8054	48.2905	17.4565	35.1541	14.328	13.6037	32.2985
48.3584	33.5968	35.8253	17.03	32.8858	13.9283	22.6075	35.8706
28.8712	19.1574	35.1816	24.9776	36.0314	32.1701	26.9078	30.105
29.4435	20.5861	20.3293	23.7999	34.4181	38.2315	30.1407	57.111
27.3718	21.5782	33.1316	32.578	25.8515	39.6541	40.5127	28.7746
31.8175	11.3005	32.1981	17.5814	38.3117	26.4264	34.4522	27.7583
22.8001	19.6814	23.1743	28.2603	43.998	48.9228	28.318	38.3538
22.7086	25.9268	35.9105	30.9818	40.2672	48.4525	24.9437	35.3593
17.8238	42.6941	42.5494	39.3339	45.0963	34.3996	21.0419	35.5261
25.5994	14.6414	31.2187	30.9344	15.9566	33.0568	24.178	44.1046
28.7253	20.8054	28.745	32.7344	33.8425	31.8808	29.7068	35.6431
20.1817	28.2629	34.784	30.0764	33.0805	37.1033	19.477	30.7696
25.3357	28.2629	19.7322	24.9776	33.2682	37.2701	35.8853	34.8193
31.6541	21.4632	33.8609	27.1147	34.8077	20.4329	21.8971	20.7862
19.9794	44.4037	29.8506	25.4198	33.5632	31.5898	20.5792	33.8461
29.6377	17.6285	32.1981	30.705	26.7743	47.0541	21.8971	23.2174
21.2856	25.7667	48.1635	21.9442	28.5379	74.5062	35.6077	42.4337
22.8552	14.6414	44.3947	36.5211	26.9637	39.7037	26.9013	39.2969
21.9182	9.38396	30.5272	33.4848	42.9319	31.8385	30.8124	33.7367
33.8973	30.6975	35.3776	25.349	26.5493	14.3966	29.2289	36.7772
24.4782	36.6483	32.4697	18.402	35.5539	54.4302	24.178	39.2637
20.3867	17.1151	42.5494	24.5645	34.4038	8.2923	32.0082	33.3536
34.0423	23.3337	31.6193	28.1931	12.3914	31.0481	32.8639	49.9612
26.6507	21.6765	33.6645	67.9626	38.3986	39.5218	35.7496	23.2174
33.9388	20.2093	34.2082	38.4925	38.0591	14.3966	30.3131	89.2952
26.4476	30.7891	24.7192	33.509	51.6296	49.0537	13.4762	98.2196
42.9021	11.8404	37.3162	43.6305	36.2883	38.9514	19.2154	45.1844
34.6734	21.9073	37.8814	43.5394	17.6596	18.4521	51.3935	22.4485
21.9302	36.118	23.1516	26.4731	26.7743	40	36.1173	19.2133
16.5066	17.052	14.6412	30.7805	48.9263	31.5898	30.5975	44.1892
22.1748	21.9073	33.2293	30.6977	52.8207	18.4521	16.5053	53.4647
25.5315	21.5202	12.96	18.6553	37.8744	25.4298	31.4461	42.5562
55.8646	45.499	23.1516	29.3125	37.619	47.0541	28.0017	22.4485
31.8175	22.4674	39.0801	18.6553	37.619	51.9624	16.5053	45.8299
22.6856	24.79	21.9324	21.2691	34.2366	20.4964	28.8334	37.5149
18.9135	31.7323	28.9102	51.8297	30.0236	30.5826	31.1117	63.7849
34.0423	33.8118	36.7358	19.7413	38.3986	52.8358	31.4461	56.7796
23.7269	29.9892	34.6786	21.6836	24.4763	21.1198	24.9551	25.9508
24.5984	24.4074	41.8872	29.3125	34.4181	24.6749	28.2821	36.5694
22.9351	25.3002	24.7192	21.2691	41.2862	57.2171	27.3995	16.1982
28.1194	19.8248	14.7548	26.4731	38.3117	30.5826	29.9822	16.1892
26.8918	28.235	36.7358	30.6126	33.966	33.4311	20.8363	55.4053
32.1054	30.6975	28.2646	26.6573	40.1987	32.8549	29.9624	10.4634
33.8973	9.53207	27.438	37.5685	33.8827	48.4073	12.4901	45.5693
24.5529	9.53207	31.7092	30.5555	27.6684	50.912	38.1983	16.1892
25.4212	9.1988	41.8872	34.5105	25.6751	40.4124	18.2599	44.7017
28.3116	29.2216	18.3882	54.4876	41.6801	40.4124	44.08	58.3906
26.6994	43.6966	41.3472	31.0778	25.9636	25.7757	24.4154	26.4186
31.4244	30.7244	35.8686	26.6163	32.0384	16.2995	29.9822	42.6291
25.0369	20.998	19.0071	21.6836	20.922	31.967	31.7336	30.2925
27.9484	31.7323	18.6693	19.7413	30.689	37.2251	28.8334	30.3263
28.4932	32.2433	18.3882	44.0573	51.1839	22.9824	15.6851	35.4953
42.022	26.6586	31.6193	20.3938	29.4641	14.8858	22.7704	36.2358
21.9302	28.235	30.6794	22.5252	16.2914	32.8549	12.5266	20.1336
18.6656	28.1289	26.9659	23.4226	35.8653	32.6441	42.8727	30.1557
19.4437	30.6058	38.01	24.9356	52.1255	32.9702	29.9624	37.4615
22.1944	33.4017	32.5102	20.9564	28.8915	16.2995	17.1321	20.1336
33.0293	26.0203	48.1263	33.1905	30.774	34.0204	52.0208	29.9315
20.4275	24.8629	34.3476	34.9881	21.3418	39.4223	18.4197	37.5536
27.7707	20.87	45.7464	29.3632	40.9133	74.5062	23.7431	15.9753
18.4661	22.9591	31.405	39.6108	30.6161	44.2844	15.5331	29.1498
40.8873	25.6998	26.9659	26.5718	31.6627	35.4782	12.9999	34.8433
33.6313	30.8335	47.0666	43.5394	42.4529	23.4627	29.5723	25.9554
33.9388	30.0304	31.405	19.2872	24.8162	23.1292	32.5287	19.5179
12.4765	30.4661	43.3666	28.8252	51.1976	35.0378	18.4197	27.4458
22.9554	33.618	45.7661	19.1715	20.3351	29.7584	24.2878	46.1465
16.9057	19.544	30.6794	20.9564	16.7976	39.4609	27.3529	10.4342
34.0356	31.6321	15.583	58.5212	48.046	17.9656	46.4598	21.9388
27.3843	19.544	25.5947	31.2829	32.0832	27.982	35.4369	39.1821
32.4839	29.1174	24.3479	24.6845	21.5354	27.982	43.9819	19.5179
19.4437	29.1879	42.3939	31.4753	45.1222	38.4678	35.1926	27.8328
18.6656	30.0304	40.7685	23.4226	20.922	33.3369	31.9223	21.9388
25.1745	26.2584	25.1351	31.3177	33.3658	33.8492	30.3963	34.4853
34.0261	36.542	20.7041	57.2415	23.7194	40.7971	37.6085	23.3895
19.7645	23.3468	18.6149	32.7506	17.0437	33.9076	41.2973	32.0565
19.5383	19.3333	14.4557	20.3673	33.3431	20.054	50.5585	27.4458
30.9329	28.1081	45.7464	32.2933	35.7662	39.4974	25.336	34.4853
25.0369	36.1058	32.3202	38.1957	27.2841	50.7734	28.2406	31.8575
25.8856	43.9972	33.4117	23.7429	15.0304	43.7853	36.0312	20.6293
25.0831	31.9449	25.3505	12.9551	31.862	30.3137	38.858	30.1176
14.3997	34.9457	30.2416	33.8667	25.5798	33.16	38.4816	32.9271
17.4883	35.0339	30.2416	22.7242	23.2747	39.217	32.8476	23.0482
27.9484	29.9895	22.6843	20.1473	22.2859	27.6792	33.867	25.8671
5.95851	27.0126	26.0749	30.3257	30.6231	31.4695	60.7604	23.6387
22.1944	23.3468	43.5216	30.2428	33.5144	19.1002	37.6085	33.8046
23.6691	25.5867	21.9981	33.9552	10.8803	34.3778	35.4369	27.389
22.9554	28.6819	18.8403	52.549	37.7525	59.2784	32.164	22.5571
25.6775	34.3998	39.9004	20.0762	35.5519	22.0269	62.1433	31.9338
22.8638	27.9273	18.1763	25.6033	10.6268	36.9881	36.8807	38.3307
25.1923	23.6805	24.8844	28.2046	13.661	32.7421	52.2223	39.266
26.0369	30.9261	24.1246	46.5168	10.8803	32.4846	47.4006	35.0859
26.5579	26.8009	44.5138	25.6056	17.6216	44.6904	46.8994	27.8328
18.7103	30.8557	38.381	27.2778	30.6231	34.3778	34.8779	28.1277
23.7382	31.3652	29.8472	36.4572	21.3871	27.3561	45.0274	30.2756
15.5697	27.9273	19.2233	14.6973	35.5519	14.7769	32.0307	62.1359
23.7158	15.9963	36.1457	39.6296	11.8755	16.256	40.5527	30.1176
18.3671	25.1912	24.2744	20.3673	22.3678	27.3561	52.7304	77.9137
26.1151	15.9963	31.5726	23.2001	30.4707	27.7872	65.9032	44.6775
22.8739	28.6447	32.7566	24.8854	22.2859	26.2863	36.1004	16.992
23.4741	22.3861	18.7596	32.2933	30.6036	21.0884	40.3313	19.0816
20.9249	28.6819	31.5897	25.2583	20.5373	34.9492	37.3068	25.8358
22.8638	23.6805	15.4457	14.6973	38.352	23.8143	40.3313	31.2874
26.6325	34.9644	42.3516	48.5999	23.7993	31.6272	36.7804	25.6578
17.3878	24.2797	24.8678	42.0263	13.8837	25.7194	40.9882	32.9158
19.1209	27.5546	32.6747	26.6912	21.1914	21.7099	39.0073	25.8331
30.596	25.2613	24.7958	40.3732	38.4894	41.0932	9.62217	31.3446
22.8214	31.4685	45.0972	42.0349	33.0119	48.1914	9.91752	30.2756
22.7461	22.866	32.4495	32.9392	44.6572	33.8997	46.3087	36.4575
29.6378	29.7457	22.6843	32.4298	37.715	28.9695	53.7031	28.4941
23.1044	50.7448	36.3049	32.7688	25.5798	39.217	9.91752	39.266
30.3548	52.7707	19.2233	42.0349	33.3431	32.943	33.0831	38.0032
17.2035	44.0211	41.692	21.2948	21.7048	23.5854	29.4403	19.6163
16.0398	32.0707	34.2764	22.5106	25.6853	32.3336	31.7766	37.445
20.7683	29.0112	24.4324	32.4298	34.9896	35.3485	29.4403	25.8358
43.2339	19.9358	37.1693	50.5496	29.6124	23.6615	37.3654	30.3232
10.9148	33.1408	21.9981	44.2841	28.8992	21.0884	42.1235	44.3143
18.7103	24.2797	26.0538	50.1541	21.0491	27.678	33.3985	35.6832
23.4448	28.2279	18.1763	41.4711	26.101	26.2863	27.668	33.0544
21.8943	44.3647	37.4184	25.6056	33.7971	93.3283	36.528	19.6163
14.9989	25.2613	46.6186	33.7096	39.7471	31.4835	26.8812	15.0159
26.3017	28.817	12.7604	33.8667	26.976	31.0111	44.6242	36.6387
12.7088	28.1209	31.6943	24.8854	30.7051	34.1272	13.8468	35.0218
33.2253	32.0228	40.6905	45.7426	42.3762	34.47	26.8923	29.8806
12.7088	25.0235	6.50683	18.8989	25.8157	24.5051	7.56756	10.0799
21.4236	61.7831	52.6153	27.0583	38.3185	26.6242	37.1734	18.4335
21.7338	33.9593	12.7604	21.6908	39.6134	44.6904	36.7804	37.1137
21.807	31.4685	24.8678	19.9742	38.3185	35.1387	40.9882	31.3631
21.9586	23.3139	36.0755	31.9287	37.7112	34.47	13.8468	17.1873
44.9559	46.6904	36.1997	39.9541	32.6454	40.9322	33.7855	38.962
17.3878	23.9685	25.1452	30.1122	24.6515	20.3176	26.5239	37.445
16.5345	32.5309	23.1228	41.9636	30.21	17.934	32.4733	36.6004
17.627	27.3736	22.2745	41.8301	45.0705	35.2008	44.0385	77.9137
26.6627	30.5477	33.9629	40.7889	34.5578	28.8561	27.1442	37.5509
15.0825	28.2279	39.9004	31.5167	27.8404	33.8997	12.6466	35.6832
27.669	47.0648	28.486	45.9929	30.2551	33.1251	14.0673	28.1733
21.4492	29.2083	33.7554	47.0153	31.5714	28.2886	6.87521	28.2148
17.2035	89.5698	37.0466	27.2095	29.1585	34.6344	12.6466	30.6294
21.297	26.7286	26.0538	33.1208	63.4063	41.8289	14.8459	43.2697
17.7126	28.3268	29.9316	22.6632	23.6923	42.5153	15.0674	28.7906
18.2097	31.0469	56.3716	33.7096	37.8854	20.3176	24.867	28.9542
39.6766	25.3131	14.2154	30.2294	28.5833	41.8289	38.5748	69.5098
21.7157	30.8272	28.3068	38.4591	35.4411	28.8765	23.3106	38.5473
13.1428	28.1209	42.3386	41.2287	15.8073	43.5966	29.2164	37.4902
26.9887	38.851	11.684	23.3629	31.5714	35.9948	7.95389	23.0327
25.4638	34.9406	38.2969	21.6908	41.4116	30.3763	9.74407	15.6038
20.7683	24.3782	42.6661	39.8673	26.4452	63.996	12.1294	23.0327
25.1189	34.9406	14.2154	27.0583	38.7196	41.3202	41.0945	15.9465
23.4448	64.3307	36.7221	33.3453	26.2217	32.8759	12.1294	26.2293
26.5918	31.2337	26.4043	24.4696	43.9206	39.1866	77.3136	30.3412
16.5345	27.9998	28.2272	41.8806	16.2916	46.8747	29.9779	14.5616
21.4236	27.1767	25.3728	34.9891	37.5958	34.0111	38.4585	14.2929
23.9609	36.8836	29.026	13.3927	36.0534	46.0838	37.1146	29.6083
20.6158	34.145	30.5438	12.1301	27.5416	53.2009	27.1442	29.6804
21.5218	36.3804	25.4616	30.2294	29.888	41.9059	15.0674	24.9513
26.5387	27.1767	24.6556	24.4696	29.4118	35.9948	35.5358	28.9542
18.0196	23.9497	29.6272	33.3856	31.8263	35.9316	31.8397	35.5477
28.6121	43.2103	42.1759	32.9277	31.0455	34.6344	42.1235	36.6004
16.828	30.0125	37.9094	31.9287	35.9572	34.7963	45.1169	28.2148
25.1614	33.495	34.6495	41.9978	38.3079	33.2238	34.6471	28.7906
11.5997	36.3804	32.8017	34.0768	28.5833	30.1564	80.1264	27.359
20.7559	28.4925	52.314	13.3927	36.0071	38.0273	33.7855	15.6038
29.4594	28.7695	46.8987	21.7937	45.486	34.0111	50.2863	33.9142
21.4492	33.5273	33.9629	27.6675	31.8316	30.4847	44.0385	17.614
25.0688	29.772	29.8425	36.6965	26.4452	33.2238	48.8606	27.2967
21.5065	118.369	43.1021	21.7937	36.2773	41.4221	114.031	23.1657
20.6158	34.6943	37.0831	27.3213	42.0784	41.0952	108.679	31.5168
32.4589	23.9497	24.6556	25.6264	32.5277	26.7291	26.9836	23.1657
27.554	27.602	29.9316	32.2775	15.617	43.1304	34.3284	29.0311
28.6808	33.5119	31.6527	41.8301	29.888	34.4079	38.8725	29.9835
28.7566	21.1533	47.2667	24.7336	25.8416	33.9983	35.368	81.6093
49.4732	34.5228	31.2656	30.2102	30.7825	28.7272	38.457	17.614
60.8339	21.3585	22.0393	22.6186	33.7127	34.688	27.1562	17.7628
29.4553	24.2469	25.5282	38.3372	31.8263	25.9979	25.5838	33.743
40.4977	23.3715	28.5714	21.4501	39.3257	27.4061	62.6332	23.15
25.009	32.4592	29.6272	36.3367	34.0342	39.1866	21.507	20.7289
11.5997	25.0842	36.7221	23.0516	20.222	47.702	26.1767	34.7461
14.5157	31.0608	37.7059	34.0278	46.4928	43.8786	25.1336	30.8726
10.7004	27.3344	28.5714	31.8613	44.1841	26.3984	34.9899	25.0459
22.1374	15.4027	34.8102	22.6186	45.2503	21.1079	26.434	27.6194
18.7556	23.4791	23.6475	31.8037	51.2804	25.0012	38.5583	30.8079
26.6049	27.3344	37.0549	31.9849	37.95	40.9823	23.3669	20.7289
19.1665	23.3715	33.7139	46.2235	30.6229	25.9979	28.9974	39.0512
39.9923	33.0539	32.7044	30.2102	37.2075	26.2294	13.9344	17.4309
22.9948	17.3739	29.1503	30.1408	20.222	32.8833	27.1562	31.1196
20.9169	26.5253	38.7175	33.0718	31.2226	40.9823	21.3955	32.8646
27.554	23.4791	44.0408	33.3856	33.7127	22.5544	35.6316	36.091
17.3726	33.0539	31.0392	53.1579	31.1579	41.0154	19.6601	40.203
23.9609	36.3765	37.8949	41.5339	33.544	29.811	46.7068	29.8486
46.082	29.2355	40.8944	29.0002	37.5869	26.1691	11.4761	19.8517
20.7245	15.1087	24.8782	36.6965	35.1382	32.8833	25.5838	29.9835
29.5825	24.6522	24.8782	33.712	18.0712	32.2433	16.5467	17.9509
17.3807	29.2355	25.4822	37.7381	35.3842	42.4237	41.7858	18.8981
21.2993	24.3364	33.4926	30.8157	38.922	30.4841	34.1727	17.959
14.5157	29.3802	28.8428	41.0898	35.3086	29.4372	33.0367	30.572
16.1749	22.8514	59.1876	32.5577	52.802	28.8986	19.6601	17.959
22.474	32.0874	29.0418	35.369	35.9621	16.459	28.7129	22.5094
30.6595	24.7115	24.8667	25.8671	39.0829	26.2294	26.1767	14.1279
15.3831	66.8037	39.1885	40.3265	34.0342	22.1253	24.7384	20.6548
39.0805	34.7587	28.9495	33.712	37.95	31.6157	32.7028	11.6838
22.2275	26.4044	32.3791	61.6657	25.4672	22.5544	35.7564	27.7886
23.4087	31.4301	60.3012	27.202	32.9771	25.9869	27.7367	32.5626
20.0503	34.02	27.2789	25.4185	32.4306	36.9163	23.8945	40.5941
25.2614	22.8514	29.1503	38.5548	41.982	21.5366	38.0731	17.8367
32.6225	37.8605	37.8593	23.2125	34.0427	56.1653	39.2976	38.2651
25.9293	34.7445	35.7509	62.571	45.2503	24.1436	27.2662	29.416
22.474	29.6765	35.1975	37.1842	35.6551	38.2552	33.5596	22.5094
22.3598	33.6469	61.9821	35.3713	38.8677	16.361	21.5659	78.9659
21.2993	31.1463	40.9707	18.2022	34.4719	45.0292	26.3361	18.2914
17.3655	26.5541	50.9165	34.5664	40.5352	25.9848	16.4903	15.1106
28.053	30.9767	37.5488	60.3699	33.7041	27.1414	24.7384	32.6806
19.1665	24.7115	17.7498	31.1007	35.6551	23.1522	27.0094	14.8974
22.9948	29.6765	28.9495	28.7043	56.5098	13.1492	35.0258	31.1196
28.8225	22.1971	27.2789	37.3306	69.012	40.3918	5.6633	25.3289
22.0267	31.4152	40.2497	15.6626	23.3343	29.343	39.6633	28.7835
25.1393	39.3257	33.699	15.2429	37.1233	30.7804	9.77046	38.2651
17.3655	40.0363	14.1999	16.3299	57.3478	34.5455	9.77046	57.4922
23.0409	29.9474	24.3051	18.8647	21.5951	16.5699	21.679	23.4069
30.9646	22.1971	38.902	36.8203	35.9621	24.5643	32.2362	30.3365
20.3665	31.902	20.0718	23.2125	35.3086	38.9987	28.7129	15.1106
24.843	21.9011	32.2081	31.793	35.1212	10.6032	28.9446	30.572
36.6157	30.7031	37.5003	30.5066	57.3388	16.5699	32.4478	15.0712
17.95	30.7306	34.4991	55.5527	32.4738	35.3505	26.8866	27.8512
19.1177	27.5944	34.8311	12.4043	38.6936	37.1072	40.7005	34.5349
47.5376	36.3729	31.8695	17.1249	17.4732	13.3219	25.8794	16.4011
28.5614	83.224	39.182	13.6841	24.3142	16.5644	26.6154	32.5626
21.2736	43.863	40.9707	18.8647	31.7615	40.9508	33.5421	21.8071
21.2914	33.0959	37.5003	82.2463	66.9931	27.7412	83.5014	35.4234
16.8136	31.4152	31.66	50.3482	36.9737	51.5034	29.4792	31.0608
21.5981	27.7137	37.4897	31.1007	26.1746	18.6954	29.4461	24.4674
16.0718	25.3227	43.6397	35.4141	31.7615	13.3219	10.0337	26.1375
25.9305	52.2097	35.8783	59.9562	55.0193	18.9544	10.6136	18.2697
27.7071	27.1123	34.9304	30.0065	21.5951	22.933	24.8585	16.7589
24.9391	27.8578	31.4334	39.2074	33.7918	29.343	108.679	28.6063
22.2275	55.4025	28.5295	27.4613	37.1233	43.3009	28.9264	36.4541
22.4579	34.0017	23.0828	36.1234	34.6229	26.5876	6.39815	41.2105
37.7018	29.0898	36.6733	52.635	26.8527	40.5093	25.1065	22.8122
16.635	30.6645	21.7978	31.182	30.5729	18.9544	39.5063	31.1126
25.2614	26.0298	24.3051	72.9665	31.5329	17.6561	24.5815	43.3884
16.1271	39.3257	12.4634	51.5414	37.012	21.9607	36.306	26.1375
18.4235	28.79	51.9539	35.4097	31.5329	42.6944	22.6658	35.4767
16.8136	25.2537	33.1691	20.4067	37.6158	29.9307	4.87005	25.6508
17.5208	38.4765	42.407	52.0327	23.6385	37.1072	7.487	21.8071
19.1177	23.7459	39.3896	22.9304	37.0582	35.9784	8.81962	15.8618
23.8466	51.7091	44.1206	47.0637	35.6944	58.8811	6.88369	22.1722
15.2131	28.8502	23.8014	45.4868	55.8118	26.5876	27.1977	32.5737
21.3038	44.2603	28.2068	63.8556	26.1746	29.396	25.1065	31.6394
21.375	25.8532	34.8943	67.0749	42.5743	18.8842	27.8026	41.2105
24.843	39.9315	33.1691	63.8556	28.7734	39.786	27.0094	24.4172
35.8664	31.291	28.5295	57.3926	42.3821	46.268	17.4317	28.1834
21.2914	25.2537	30.5037	43.831	29.7109	11.0139	21.2608	38.7987
18.056	32.5941	13.6556	35.7791	32.8275	37.7752	26.0961	29.6251
17.7634	22.6612	17.9954	56.4501	43.1663	43.3334	29.9303	22.8122
24.2166	32.2041	34.9304	29.0885	33.603	29.396	26.1722	20.3848
17.7634	26.7108	20.3138	41.0783	41.5206	49.0274	27.3942	26.1021
21.2736	28.2429	21.08	62.5125	19.6563	18.8842	21.0468	24.7615
17.6993	28.8502	28.4232	62.5125	54.028	34.2147	32.208	15.6128
22.9011	24.8875	39.4669	30.2849	36.6333	55.7958	9.41089	32.5737
23.53	31.2476	31.0716	49.5746	29.7109	46.1261	28.4897	22.1722
27.0308	39.2295	62.7355	49.4462	48.5803	44.9113	9.41089	16.4188
15.2801	21.1538	36.0897	35.4798	41.3198	18.3632	32.208	21.1017
17.5208	25.993	18.2165	38.4647	30.5705	44.5719	31.9831	27.7192
24.7868	49.8065	23.05	45.7536	33.3608	39.3938	8.16374	36.1382
25.1975	28.8599	42.2544	46.7774	57.5776	38.2056	42.5584	27.6422
25.1975	30.948	23.2906	35.4798	29.3875	23.9246	10.103	25.7518
31.4686	36.592	39.2345	109.008	24.8883	53.5514	31.5249	28.1834
30.3723	49.0875	46.5571	52.5909	46.3424	21.8925	27.3942	29.1029
29.5357	40.3784	30.5484	46.2747	37.1137	51.0622	27.7863	18.4024
22.4353	31.2476	22.8832	51.9317	37.9767	36.8043	26.0961	27.6422
16.89	41.0012	27.7618	38.4647	50.2044	33.4773	10.103	32.139
34.73	31.0929	28.6973	54.7814	45.7861	43.3334	27.8162	33.406
18.4105	27.1519	29.134	40.0666	43.4142	34.2147	18.8073	28.9493
21.1922	24.7462	28.2558	55.1286	31.2841	21.8925	28.7809	36.1382
16.21	27.1519	44.1206	48.1582	42.3821	43.5295	31.419	48.9901
23.5161	92.9626	21.4406	69.3946	42.0075	52.4326	15.6765	33.673
18.4105	24.9186	34.2234	44.1426	30.3086	39.6586	22.7509	27.6789
26.1565	36.592	8.85063	36.8731	40.9224	31.1612	16.7391	34.5616
18.4815	16.5288	11.2194	45.6494	41.3198	121.853	36.106	29.5007
30.2421	23.9011	36.0866	37.092	22.6086	44.4991	39.9382	32.9202
21.1836	33.1962	11.2194	43.2202	60.4161	36.8043	23.0414	33.463
22.0295	12.9342	36.2145	37.0941	24.8883	39.3938	20.0613	24.5815
25.6915	34.5027	30.6108	45.2723	14.7194	19.5747	25.7355	24.5134
17.3687	41.1051	33.341	32.4126	38.0222	44.9583	23.1318	24.3311
21.1288	41.6017	25.96	36.8731	18.6726	52.6342	33.9195	22.1855
21.9118	41.6017	31.698	47.9603	36.9652	36.0021	27.2766	45.6905
20.1221	19.0158	34.8368	46.2959	18.6726	32.621	20.8857	27.7192
27.3907	12.8343	20.733	40.7027	43.5337	56.3569	14.8191	19.9033
20.1362	16.5288	34.5356	28.9461	38.7913	58.8129	28.5492	29.1029
22.2644	30.4904	25.21	17.8568	57.5776	13.3265	20.8857	30.2734
21.0834	10.7912	28.7694	48.1582	40.4303	19.5747	25.7355	36.603
37.7018	9.68716	20.8814	27.5645	45.855	72.3687	37.6364	14.9959
33.7583	30.4834	29.134	26.3025	37.1137	32.7527	29.4218	20.9803
20.0739	46.3552	34.4049	32.4126	38.7078	68.457	32.8234	24.2767
17.5823	40.2943	38.5666	43.3929	42.0075	60.7698	27.7863	26.7294
14.1247	46.4571	34.8368	97.4312	41.5069	68.457	15.7765	27.6789
24.2523	46.727	23.0056	47.2431	27.6785	9.78947	18.9535	34.5033
18.5538	53.236	27.3338	28.0273	37.5484	20.8993	12.085	30.9243
25.1408	33.8727	34.6223	36.6396	45.855	8.46549	28.927	21.8894
17.5607	46.286	20.8814	23.8161	30.1736	36.3043	24.3376	34.1339
25.6476	16.0436	15.6822	39.272	28.7082	17.9112	14.2238	30.9243
21.2387	35.6956	33.1659	49.1504	46.1759	9.78947	24.733	29.5942
16.9508	25.2519	31.698	32.4031	44.4881	52.1853	18.542	16.0708
28.1973	74.4095	56.6321	23.8161	38.1117	9.89472	14.1518	26.6751
29.6662	18.778	27.5562	22.2207	30.1736	16.7372	32.7983	11.5665
24.3923	44.2186	50.4167	60.8554	53.6989	37.5197	23.024	15.8033
22.8585	30.5681	26.5148	32.443	53.8621	106.452	10.2704	34.5616
33.0386	42.4878	30.4326	30.5302	101.183	39.6586	18.2972	11.2825
23.6459	50.5883	56.6321	25.1324	48.767	39.1123	19.7235	30.446
16.1499	30.3473	23.0056	76.4556	38.4289	31.7196	29.4218	11.5665
21.075	11.8752	26.5148	88.8997	31.8755	26.0419	16.0165	27.8431
27.3566	10.1474	59.1876	38.1595	29.679	45.6546	14.2238	27.9221
19.2656	30.3473	32.5608	43.3929	36.2909	22.7628	34.1464	14.8839
27.2123	41.7027	36.4492	48.6584	31.5589	129.63	31.2788	29.9888
18.4815	14.3812	34.6223	44.3634	54.6396	36.1227	25.401	15.8829
26.7348	14.3812	41.7326	46.2959	31.8755	60.6422	31.8848	28.3025
18.478	13.723	19.4199	34.049	37.7888	22.963	12.6662	18.7131
22.2644	62.2331	13.4788	40.4288	43.8882	25.3836	28.923	27.0383
20.7119	30.648	29.9747	39.272	38.8433	50.4483	13.0976	34.1339
23.1719	11.7878	35.4928	16.6457	47.4568	38.3898	18.2144	33.3211
23.5616	40.8746	30.1797	17.5758	47.5017	51.2723	26.355	38.7992
26.2744	41.6147	30.0293	58.8151	55.1528	27.98	35.1257	14.8839
16.9415	13.0546	12.9236	30.2543	42.6672	47.6679	26.3971	24.5992
16.9508	21.0514	13.7063	43.8335	29.0132	38.2971	19.6908	28.8094
32.0087	19.2303	27.3643	46.6778	169.135	52.2792	18.3057	35.9532
26.5172	50.0961	28.7929	31.1596	39.0788	25.1436	22.2036	14.8654
24.3923	32.3388	34.9041	17.1432	44.4881	63.1753	27.7276	12.7879
27.5948	32.3388	34.5987	39.1361	38.8433	20.1972	35.7914	34.0622
17.5607	27.0644	27.3643	51.1062	36.867	14.6736	8.42055	37.0024
21.7152	30.6818	34.9041	43.8335	49.6204	22.7726	24.4447	18.9725
25.5354	55.5234	41.1726	10.0966	48.518	8.72497	27.7276	44.1095
24.9625	30.6818	36.8384	17.5758	40.6741	18.0053	11.6533	17.8682
26.8357	40.8746	36.5907	23.0213	43.8882	25.3836	28.8056	32.2839
24.1456	30.2794	31.6767	17.1895	56.848	36.057	16.0165	22.1792
32.7263	32.1878	25.9208	17.1432	57.161	20.1972	11.6533	16.7201
13.9942	35.5138	35.4928	20.9198	48.518	14.6736	24.4447	15.4647
27.5871	30.1537	46.2388	25.7705	58.1021	33.2191	22.055	17.93
15.9617	60.4432	27.5382	30.1819	40.11	38.3898	31.1434	21.5367
14.7501	32.1878	35.8281	49.8305	43.2664	47.2895	32.6362	20.5645
20.2878	32.8518	33.7835	38.8765	61.9615	53.8514	23.183	33.9179
13.5594	48.4107	40.0047	21.898	54.8921	36.1227	37.4873	30.4223
41.989	42.7726	25.9208	28.4874	40.11	31.2655	39.9398	37.1212
23.6459	47.8418	30.0293	116.695	35.8239	34.6597	34.6496	20.9938
27.7083	32.8518	36.8859	29.9149	40.1013	24.2341	18.4817	19.5307
13.5594	36.1339	31.2242	37.6086	61.1277	47.6679	30.5021	32.2348
17.0113	105.342	40.772	27.5291	43.9106	21.0409	36.3308	18.7176
19.9202	42.7726	28.7929	24.2312	69.5997	22.7726	23.9281	23.9798
38.833	33.9421	53.8211	110.826	43.9275	55.8724	29.8318	14.8778
18.3689	33.5517	27.0745	33.8851	87.8352	31.6975	32.1542	28.8094
22.5939	47.8418	39.682	36.3011	52.2991	41.318	24.6029	34.6327
30.3465	33.5517	41.1726	31.4281	76.8637	47.2895	21.2584	15.0688
24.8461	30.5693	50.8437	44.0807	57.1669	31.1916	26.5228	32.5434
32.3079	55.2215	33.7835	27.5291	57.761	25.5694	34.1255	25.31
28.2651	23.9928	40.2177	32.8237	43.9106	36.1127	14.3513	32.4127
30.8472	34.0197	36.4369	37.9956	55.1773	29.3358	29.273	34.2523
24.9625	24.2908	14.6476	27.1539	42.6899	47.5843	11.4437	19.1419
31.8233	31.8407	59.2348	21.011	30.5372	33.961	36.3308	26.9198
17.0113	43.2673	37.9859	31.3498	57.5364	33.2269	13.4821	54.6819
15.3605	37.82	32.8408	19.8962	37.1019	49.1775	21.2584	30.9053
15.7143	35.1967	20.7749	17.2567	63.9273	24.2479	13.8662	39.0171
13.9942	149.75	40.8175	30.0484	41.2871	45.3963	17.1844	23.9778
28.0778	149.778	39.7678	31.0055	45.2396	41.1618	32.6509	26.7275
18.9735	171.86	32.7944	18.9938	54.4918	31.1916	17.8124	37.1212
18.5872	25.6091	37.7524	38.9937	35.6236	12.2721	22.055	21.1676
25.3813	15.5551	14.6476	13.7214	33.9972	36.3784	27.3334	27.5859
23.1428	15.5551	27.0745	34.3576	28.0713	12.7186	33.3618	30.5313
24.1456	20.9081	51.25	11.704	54.1873	55.939	20.3969	24.6139
17.8759	17.1339	26.0019	20.9232	52.2547	36.3784	26.5228	24.2725
23.1199	10.7258	44.9211	37.88	33.9972	30.1634	28.0723	29.0056
14.453	10.7258	22.0913	10.7597	34.075	41.318	43.3127	29.0056
17.93	19.7373	39.4336	6.02034	54.7719	11.5334	27.0534	29.1012
28.4465	31.6463	39.4336	24.4051	53.5244	36.7828	45.6497	26.4728
27.3871	57.4568	41.1101	7.72776	47	13.6289	35.6959	25.654
13.2136	46.5383	79.9734	33.3622	43.5595	25.6247	20.8711	23.9778
25.9165	33.0157	39.7678	7.72776	70.8934	42.5571	36.7029	24.2237
22.5939	18.5798	35.4702	24.7965	40.132	52.0247	52.2239	36.1228
20.0758	26.433	57.4432	24.4051	61.5559	24.0905	20.4932	27.5859
18.3689	10.3285	33.8568	31.0055	112.956	31.2005	17.1214	20.6778
24.14	26.8296	41.1101	24.417	52.2547	24.0938	38.034	29.93
27.3871	17.9596	32.2601	11.1975	54.9274	12.1771	25.0969	34.6327
25.2774	20.3442	27.9004	20.7358	40.132	15.8896	30.9604	28.5784
23.9113	36.5308	24.3653	11.7879	40.1174	25.6247	23.009	37.6462
15.9757	21.2265	36.1468	34.1431	35.5268	28.6491	23.1955	25.1458
19.833	26.8296	37.9859	18.9938	36.7352	15.8896	15.0596	32.5184
27.5871	18.8207	35.5915	16.1308	52.4471	20.7156	27.5955	26.8753
23.3571	19.2872	42.4766	26.498	54.7719	52.5316	21.7456	29.2749
19.2073	30.4494	33.972	22.1544	44.6031	18.9193	15.821	25.877
23.4629	13.9621	44.9211	10.6013	44.6031	46.3057	17.1214	34.0125
21.1302	16.6435	47.2001	35.6615	205.802	37.2129	9.15301	16.5924
25.1389	34.0606	79.9734	36.6839	52.4471	31.1157	15.5421	43.698
15.5614	20.3442	20.6549	17.479	34.3543	36.6492	24.4051	27.0871
14.2196	4.64013	40.9982	30.0484	6.33024	31.0361	27.6575	21.9912
16.8766	28.3718	25.2831	51.1949	68.317	60.23	27.0534	23.0014
20.5105	38.9908	32.4741	11.7246	75.0907	49.7446	5.7071	15.7792
21.1726	31.4734	41.4201	35.7866	4.61934	39.5568	25.3661	23.0014
23.4629	14.0918	25.2831	27.7655	6.33024	46.8567	24.0266	26.7096
10.5384	21.4761	19.1178	40.0996	40.0817	28.0055	13.9233	25.4902
23.6366	21.4761	38.6381	40.6248	44.3135	22.2852	19.5053	25.3556
19.2073	19.8071	36.8811	19.05	81.628	31.1157	25.6493	9.03679
16.8766	18.3085	12.1802	30.2118	40.0817	80.0952	24.3513	39.003
14.2196	16.8247	32.4741	48.5754	55.1657	52.7673	26.12	18.6825
18.6536	28.8729	51.4333	25.2701	76.4217	26.8077	3.54724	28.9187
25.9024	8.9224	50.9092	31.4838	56.9432	49.1692	31.7587	25.1458
27.9465	20.7337	51.8942	34.3918	68.317	36.5602	33.8575	16.5924
21.3719	11.0474	36.2444	26.5516	34.2617	38.8423	24.4051	27.2226
16.333	40.6554	42.6105	44.3347	34.2617	44.8597	18.0652	24.6994
23.6069	19.2872	39.052	27.7058	31.2268	69.7883	5.2324	32.4688
26.0918	12.4288	59.673	32.3017	53.0976	16.0204	8.27924	31.9744
19.8737	15.6191	36.8811	47.5093	29.0423	28.0055	25.0969	10.1146
23.7315	17.0054	44.7393	19.9061	30.9092	38.8423	23.1944	13.2378
27.9464	12.1155	19.1178	40.1439	38.694	45.21	30.1013	51.2181
23.7337	27.4036	37.882	25.5199	30.5563	26.8077	32.9579	36.687
27.5483	20.7618	33.1785	27.1605	31.4692	43.4768	32.3689	24.8694
22.4807	30.1726	43.0152	26.9599	43.8373	46.5155	25.2816	20.6177
14.7484	18.7094	48.3566	33.9219	26.6631	63.1292	28.7018	27.6965
27.5004	12.1155	73.3437	31.3853	35.5086	40.9811	30.1013	17.1077
28.0005	21.9024	45.169	25.2701	35.4149	37.8989	26.1831	29.0779
13.8364	33.0157	34.2975	31.502	29.0423	41.8154	32.7592	30.4523
34.162	15.6191	26.1561	27.1605	50.7674	49.1692	28.6291	32.5091
20.4305	15.7722	18.8078	29.6222	38.8526	35.0022	30.9604	25.8957
23.7315	14.7533	23.8952	19.9061	36.7572	28.1297	49.6625	35.0975
21.3719	20.4754	31.6822	25.694	33.4683	60.8235	27.1417	29.2754
18.147	17.0054	37.6048	43.5713	49.4068	64.1424	25.4093	25.3556
19.6851	28.3718	41.4201	30.6253	41.584	40.2684	33.8575	28.3942
25.9438	21.8223	38.0214	28.7939	31.1792	39.8632	29.5207	36.8395
22.6289	22.8055	21.417	27.2435	53.0976	53.9521	31.0444	41.7432
22.9513	24.4672	37.9832	23.3599	36.232	42.288	18.3519	17.4104
21.1302	35.9303	27.4216	41.8663	32.3486	36.7522	20.0053	19.7543
14.9976	33.9167	29.3093	25.769	33.1308	37.8989	31.7587	30.8495
18.5438	12.8837	36.7423	25.6766	37.6454	22.1725	23.7987	21.7379
19.5316	47.417	32.1059	23.8269	31.1792	22.1725	22.127	30.0677
15.7696	23.0596	28.5409	38.1105	27.3514	41.1138	18.2137	25.8957
18.147	21.9362	37.5153	28.0185	36.6791	41.8837	25.5586	35.5684
22.1302	11.9265	26.1561	32.9023	32.5032	35.9154	23.843	19.4206
18.7667	27.7776	37.882	27.525	18.1928	50.0333	38.7654	43.7116
24.014	15.7722	21.417	24.2204	44.7358	41.8154	30.3398	26.1541
21.5432	17.1341	17.0767	38.3365	76.4086	40.0073	23.8745	15.6992
28.803	27.5103	38.0479	15.7448	30.2873	16.8576	16.473	23.2422
26.5868	19.4931	41.4866	43.2411	36.2776	28.7024	33.999	27.5314
22.6658	10.6802	32.3235	24.2204	46.7846	38.4229	31.2121	36.8395
22.9087	28.0497	30.6802	27.7062	56.8928	29.0937	33.0965	41.9219
25.7976	23.2152	41.1038	40.1439	55.9978	41.8837	18.8942	15.2691
22.6688	26.8654	35.4182	45.6094	35.8654	36.7522	32.4456	23.5083
14.9976	34.9407	35.1605	36.2264	35.0539	32.8577	21.5608	21.7379
15.8444	26.2756	14.1192	30.81	28.6602	44.8836	18.3756	21.3082
26.1392	20.5895	16.8441	16.0473	31.3125	44.3664	16.473	27.4705
19.5617	16.6253	27.4216	12.875	74.8658	44.059	38.0117	20.115
23.8245	19.3789	33.1004	15.8434	32.2452	31.8364	16.1583	36.687
21.7385	10.5345	31.2271	15.8434	26.8165	35.9154	25.8421	18.4856
17.7255	19.8793	30.7982	34.1828	38.1414	33.5874	25.4093	31.6433
23.7337	14.6898	30.6529	33.9293	24.4681	24.9905	23.7987	20.4632
29.0922	12.8837	33.3999	16.0473	33.5186	48.8943	18.9565	21.6186
22.7564	18.671	33.2899	9.74006	29.5106	43.7083	24.4429	23.7226
18.5438	14.4975	16.8441	44.3552	25.2111	21.5317	28.8729	14.7605
22.1533	23.6875	28.5409	25.8303	45.7413	49.1413	23.3948	29.0574
21.566	31.1642	37.6048	29.6586	33.6015	26.6656	13.2118	51.2181
19.5259	19.4931	43.1878	27.9474	46.7846	40.8394	39.4834	21.6186
30.8925	21.4624	39.6437	23.8269	29.5106	48.8399	27.2115	30.5863
28.79	24.1887	46.1439	29.6105	15.0996	42.4036	35.3573	29.3973
18.7023	18.1367	34.9077	35.8468	35.8654	40.474	27.3385	18.9801
27.9699	16.6369	34.8133	27.525	42.8963	41.6765	28.1529	34.5011
24.9845	23.0596	44.6376	38.1435	64.4205	55.1002	22.2562	27.9749
24.2762	17.4062	42.8434	38.3365	37.1464	24.9905	23.3485	18.4856
14.7493	22.2436	54.7389	28.81	39.4718	43.2525	23.6502	33.3266
23.9977	24.1887	17.1954	33.1119	24.4681	32.8426	23.7933	27.5621
17.1505	61.7213	45.5051	17.6299	8.57206	43.3173	27.4593	23.7226
22.8495	21.7449	30.7982	38.9463	19.8462	26.6656	26.3401	25.3567
26.0442	20.5895	33.9462	38.3695	24.6073	44.3664	35.2656	26.7291
25.7447	20.8733	34.6474	33.124	48.8898	44.859	21.1898	24.4622
29.7005	17.4557	41.1038	37.9678	8.57206	20.2591	37.3586	60.419
14.7493	22.7734	34.6652	36.714	49.5896	36.4778	31.5191	32.4844
23.8245	16.5719	36.5504	38.9998	28.1445	42.6137	19.2807	18.0349
20.8171	23.353	20.6527	26.9997	39.7092	48.3522	29.898	72.2435
21.566	32.5855	40.4825	41.0214	39.5844	44.859	23.6995	23.6625
21.2046	22.2912	20.6527	28.6752	30.0279	29.288	26.2647	31.0262
19.2326	41.5005	30.2733	22.2565	31.3802	40.8394	26.8197	175.104
22.9087	23.6875	43.337	21.2466	16.4741	45.9704	24.0763	25.1565
30.8922	26.2756	36.2204	21.7345	48.4131	20.2591	40.5618	20.3355
21.2046	17.2331	33.9462	13.724	28.359	23.3283	23.3948	28.3641
19.5617	17.4062	37.6007	41.0214	37.1464	35.8751	28.1072	38.051
20.7173	29.4375	24.5288	21.2466	27.9464	40.474	28.0843	24.7313
25.1182	13.7473	29.6548	10.4669	39.4718	39.6063	40.1548	38.7094
24.3823	16.6369	52.7497	33.1119	25.0943	23.3283	16.9116	34.7819
21.4162	21.7447	27.5685	41.0144	26.2301	30.1	22.2562	31.6433
18.2131	18.1367	11.0478	13.724	34.0983	24.1754	31.6412	24.7313
21.8509	15.7179	39.0244	28.7852	39.2671	11.1512	28.155	25.3567
21.3361	21.7447	9.41202	25.9799	34.8983	27.1058	41.2151	36.3346
19.2326	23.6222	36.1436	17.8893	44.7332	35.5	22.6241	15.7449
24.8093	29.4398	34.6652	28.2121	39.2671	43.3755	16.5349	28.1124
24.8093	12.6261	19.4803	27.8202	34.6478	5.85089	28.0914	15.7449
32.1154	29.826	10.4278	35.1595	31.3802	11.1512	9.79727	36.2671
33.9011	36.9415	15.3931	11.3034	43.5428	25.2973	24.4408	27.6872
30.4893	16.1577	30.4149	35.4179	49.6075	17.378	23.5703	15.3759
19.5259	22.6197	90.1588	37.87	34.9349	27.2179	35.3573	40.0458
24.0664	15.5782	30.8249	38.894	26.6892	35.8791	25.7341	24.3971
22.8495	25.4016	24.7608	27.3666	37.443	27.1058	33.8203	17.2499
21.4952	16.2932	30.2733	21.7108	25.7548	30.2049	9.79727	38.8125
21.9281	10.7385	39.6682	26.9997	36.7614	18.076	29.7629	51.963
23.3543	26.2969	40.4554	42.7751	40.5996	14.8238	19.2264	15.4625
28.5758	32.5855	33.7103	32.3523	31.4164	20.1694	15.7238	39.6359
19.8421	19.1644	21.2087	31.1114	29.6698	48.5268	32.1544	13.7033
23.4051	25.4016	18.9952	15.2204	16.1646	24.1754	38.675	32.507
29.476	18.8666	44.5914	29.1363	34.6478	36.9362	25.9811	37.4939
22.4479	17.6694	29.2168	42.7751	10.9503	41.823	28.1072	47.9026
25.5214	15.8707	25.5132	28.7852	29.6698	45.9124	33.8203	23.6088
23.0171	23.2935	37.6007	37.3441	40.4126	18.0695	21.231	10.2691
23.6742	26.5117	21.8888	29.1568	16.7167	14.8238	9.64026	37.3003
25.7447	12.6261	19.6041	25.9799	40.9021	38.1048	24.4167	40.0458
22.3931	33.7276	47.1101	34.9485	38.8511	14.3564	16.9678	32.249
20.7522	22.8426	80.2153	31.6221	31.3296	18.0695	14.3082	22.9198
28.1336	10.7385	36.6928	55.8756	34.0983	26.3758	20.0511	28.9877
24.3497	28.5286	31.4336	20.2008	29.7427	20.4537	34.2597	17.1325
18.1781	52.5924	39.1632	17.0255	11.7078	21.7171	19.3646	33.2715
20.7173	26.4247	33.014	16.6154	34.7213	19.1547	19.2264	33.6404
18.7056	19.0159	33.7103	39.8595	36.7614	46.7921	27.443	37.4939
21.7973	62.3004	52.7497	29.8737	38.0207	21.8116	18.9299	90.3392
24.9124	16.9833	31.9723	32.1336	44.2511	13.694	10.0364	88.9738
38.5114	24.0486	37.2471	32.252	31.3296	44.6306	29.6709	32.1381
21.8366	21.6889	33.7756	27.8202	45.0958	40.7286	29.2822	46.6717
17.0403	23.1832	19.6041	38.84	17.5313	43.8701	34.0246	26.9966
25.3093	24.3609	127.362	35.3483	39.5525	33.0423	31.2891	37.3003
27.2174	24.2886	39.7144	30.5504	39.7195	38.1759	31.6412	55.6829
22.8342	14.2736	45.3285	27.9888	27.6782	45.0299	31.5079	29.5833
27.782	15.8707	27.7661	39.8595	34.705	43.1206	17.8065	32.249
24.3497	25.2635	28.7739	38.84	41.7646	40.0535	14.9017	76.3792
31.8102	16.9833	43.2949	32.8967	40.5996	8.98665	18.5135	30.1915
27.4915	20.9587	38.8672	29.1363	31.38	13.4061	12.9142	28.5265
21.1116	26.5117	49.7812	33.8503	41.4063	4.83569	39.449	30.1915
20.8244	24.1149	38.1212	13.2118	29.3568	8.98665	17.2165	76.3792
29.4318	28.4222	42.5712	42.2378	33.2229	14.5573	32.1544	39.6602
23.6919	21.5561	24.414	16.0726	37.1368	48.3441	16.2301	60.2706
32.1154	24.2619	33.014	29.4892	31.386	44.4991	10.4465	22.5493
23.7999	24.0596	12.2544	13.2118	36.1105	44.0167	31.1595	16.5604
27.2664	20.4067	16.809	35.1645	46.3626	32.0752	41.0495	20.4275
25.6486	43.2139	28.4682	28.6882	36.1105	15.4342	30.8963	29.5589
24.0563	24.1149	31.8794	25.7027	29.3568	44.4991	18.2529	12.2345
22.3675	36.4951	34.3184	17.6745	33.3707	29.1483	17.8241	31.692
20.1382	10.6874	24.6806	38.1888	34.7213	36.7385	30.9298	39.6602
23.5242	24.3563	50.187	16.8893	32.3618	33.0327	16.1646	22.3521
23.6742	20.4825	24.414	30.4214	30.5982	53.4937	18.8939	39.0265
28.5758	28.5232	16.809	38.3972	45.5858	32.7343	22.7408	37.5289
31.7368	12.9707	24.6806	43.4211	30.9378	30.8428	19.3579	44.8728
25.899	16.9468	48.9018	15.9615	35.1502	42.4435	19.5847	63.833
27.5897	54.7317	34.5659	27.7085	32.1062	32.0066	19.03	39.5008
23.4136	27.0684	40.7783	30.4004	34.2141	45	30.9298	49.865
18.328	34.071	30.8285	28.4666	31.2168	40.0445	27.1826	19.2469
31.2686	40.949	90.1588	21.3623	51.1658	45.0299	17.8065	37.5289
20.7269	32.8434	32.7725	31.9237	37.5792	39.2708	33.9956	40.9793
26.4631	15.7368	37.4177	15.9615	75.4166	40.7506	17.7792	47.3464
22.6044	28.5286	41.6965	18.2804	35.3742	43.8292	18.5135	49.394
26.476	26.9243	46.054	28.8219	24.9306	30.5517	27.4441	15.1842
22.9179	22.7154	43.907	25.6335	50.2236	40.7704	13.0131	23.5047
24.1172	20.9391	45.922	31.9519	31.4981	30.1941	17.8241	39.0265
14.5907	18.9157	45.599	30.8617	37.9168	44.0167	18.8939	15.1842
29.0627	18.2912	53.9249	16.341	36.2148	39.8453	30.5045	41.877
26.1322	20.9391	30.8725	17.655	25.3602	34.7253	21.0783	39.9455
23.5661	24.3721	44.604	33.8184	37.5892	33.0665	9.0405	30.1782
21.1116	18.3102	33.4077	31.3815	33.6205	28.1767	32.8763	38.0721
24.278	16.1918	46.3538	17.655	34.2141	33.0665	28.4318	52.5048
28.1818	24.0596	36.5556	31.6519	46.8903	49.9149	35.8726	38.8461
25.3741	33.4033	28.99	37.9271	26.2466	29.9928	9.73566	44.8532
27.782	20.51	29.5571	30.2884	35.1502	34.4596	25.4251	41.1657
18.6941	22.7342	37.3088	27.7083	33.6205	39.295	34.1483	30.1782
24.278	19.0519	34.5659	41.0085	34.9771	29.164	39.9604	49.8134
39.4084	19.0519	36.9911	48.4437	23.354	24.54	27.9129	49.6589
27.4915	27.5748	46.1651	37.2388	31.4981	96.0734	7.81174	48.1489
26.1322	19.9477	38.4666	38.5721	39.4213	61.6864	20.6089	42.57
26.5171	24.3721	26.25	16.064	24.4839	36.7403	35.1192	42.7726
22.9925	38.6795	23.3428	26.3636	43.5621	39.0351	35.5123	46.7278
20.7269	18.7696	40.0047	18.2804	16.0064	68.7866	9.73566	33.2205
29.4318	24.4119	29.2042	31.4072	26.8035	32.7071	12.0813	32.8725
18.6941	24.7484	31.3025	27.4183	38.8183	39.295	18.942	58.0931
31.103	22.419	81.4394	31.9519	33.366	34.4596	10.7811	24.9509
26.7029	22.4077	15.358	34.2779	28.2362	29.8297	33.9956	41.1657
14.4863	16.4356	29.7686	42.4401	42.9476	32.7071	22.7476	32.8483
21.4591	22.1333	81.4394	42.1948	39.0687	25.2562	23.9514	32.5462
23.4136	18.2326	23.3428	39.0539	34.0755	49.7505	34.5418	24.9376
19.3335	16.4235	29.4077	21.9374	31.9929	32.5159	21.5376	30.495
30.9404	17.623	41.2353	31.4956	28.1949	36.3024	12.3349	37.5123
35.5004	34.363	28.4998	14.9493	37.4591	39.8869	15.0194	46.7944
24.7241	21.7766	12.7795	21.3645	35.9773	29.8297	10.7811	30.8865
18.8152	48.9394	15.1251	20.9871	25.3287	29.164	18.2091	33.5574
33.9798	21.8276	34.0049	34.746	48.6247	34.025	16.8896	37.9116
27.1509	33.7512	34.4424	23.1484	48.6247	48.3019	14.2448	16.2461
24.9181	30.7119	49.6978	40.7059	46.8903	21.6735	35.0531	32.8483
29.056	33.2353	30.2369	28.4474	37.0226	38.6537	30.5045	23.3969
53.9211	13.6526	29.4077	22.6717	20.972	40.1034	20.8136	56.2063
29.0627	23.453	41.2353	27.7083	47.9595	48.1068	37.0825	49.1053
27.2404	31.0393	21.0165	30.6141	33.4558	32.4449	14.6689	41.1169
20.8177	19.0369	21.0165	26.4973	45.2993	25.2562	28.338	26.8143
20.7491	31.0166	15.1251	25.408	41.4566	21.6735	18.942	30.495
20.3753	16.9168	22.1429	22.5881	32.6943	27.4439	29.8772	23.3969
30.5781	22.5338	38.4792	22.3201	16.4129	36.2838	44.1299	15.0794
25.1805	21.483	38.4666	46.5883	18.4561	28.8232	17.3045	44.5602
14.4863	22.5125	26.1275	20.2185	28.1949	30.549	44.0681	26.8143
22.914	27.5748	25.6754	27.6813	20.972	25.727	34.2588	35.0507
26.4715	26.7555	42.5244	23.2941	13.6779	40.8415	34.1327	55.327
24.7272	21.2415	63.3828	31.886	32.4654	14.0503	12.9841	51.5996
20.6683	20.7056	38.7519	32.5957	36.387	25.727	33.9506	24.1664
29.3424	24.8772	23.3839	23.3786	32.1755	33.7196	35.7528	32.0295
29.8778	37.4318	34.6934	30.2845	36.7965	29.54	24.3991	105.215
24.6657	21.9993	35.524	35.1521	40.6023	29.9094	17.2183	43.8573
33.7906	22.5511	53.0295	37.5011	35.497	35.9194	29.7636	35.0507
29.7261	20.9704	50.459	31.886	31.5538	41.4375	30.4982	57.4806
23.8773	38.7876	26.4609	29.2432	69.9455	50.3427	29.6848	111.334
18.7115	38.3064	34.9131	32.2739	37.5268	44.4654	13.083	35.4729
28.2081	21.7099	43.8658	29.5107	45.7297	29.1626	22.2417	31.2763
24.924	40.2924	44.7073	24.1406	32.9038	59.069	23.9559	22.2388
26.7029	21.483	38.7519	23.8159	35.6235	31.6693	27.1955	50.0147
31.38	21.3846	49.6137	33.1683	16.4129	30.1008	28.0235	38.6333
16.9162	35.0765	36.5627	27.6541	32.7825	94.687	28.8356	28.9275
20.5709	19.8195	45.3866	35.284	35.1237	28.8266	25.6841	31.2763
30.1737	37.4648	52.0383	38.5686	49.8615	34.3943	16.706	32.6896
27.4406	17.3649	64.0675	28.6258	27.3532	46.1952	35.5123	30.0332
22.914	28.968	48.9174	21.8717	23.0721	43.716	9.25137	38.6365
25.1805	21.1652	34.6671	43.4485	23.7692	29.1626	17.3045	32.6896
26.6113	24.6508	33.8847	41.7333	44.7776	22.6177	10.6142	22.3098
17.153	24.0368	49.5467	37.1499	28.1585	47.4118	12.3624	12.5977
24.7255	36.1638	61.9751	37.2358	29.3583	59.862	21.7346	38.2375
20.4261	25.4593	33.6322	20.2185	46.2345	17.1024	16.706	58.3522
27.3515	25.3305	33.5258	23.3786	29.3583	29.8712	35.3078	30.0332
14.207	21.9993	47.9726	26.7566	25.7823	31.6693	13.4958	12.7027
24.2535	22.5125	39.2372	24.1742	34.4765	42.0326	28.2235	80.2263
25.9017	16.6176	18.7507	25.5202	33.8685	34.3943	16.9949	35.008
21.1538	21.7975	28.3508	26.4973	34.7131	92.0424	21.7346	93.9762
18.194	36.4193	12.8872	36.1583	27.3532	50.3907	27.0691	102.248
26.6113	22.8203	31.0009	28.4474	40.5101	18.1924	31.2369	38.2375
30.0255	25.306	18.7507	32.4145	24.8892	42.5198	24.0324	22.8821
27.4406	18.1805	8.92923	25.4336	39.2309	126.548	40.9189	47.1077
27.3217	32.3974	13.1719	35.7975	32.6947	32.3538	24.3991	28.853
16.9846	24.0704	33.5258	36.9774	37.9864	58.2745	25.8653	55.5975
27.3411	23.7701	40.219	21.3949	33.2379	77.5256	26.1868	41.2192
18.9613	16.6176	16.6944	24.2542	34.2195	80.1063	27.225	34.589
29.8778	51.3246	82.2867	33.2648	35.6235	53.8305	29.8772	35.9492
22.9314	45.4555	17.3128	26.7566	29.9963	49.8484	15.282	51.1328
26.0583	19.622	50.7164	24.2542	23.3439	54.0996	14.921	41.3467
28.7248	17.3649	38.3522	29.2328	34.3147	70.2026	28.0235	32.8013
23.7382	14.5591	34.6671	30.2845	31.2634	54.0996	37.2221	28.1564
31.965	20.7186	21.3103	30.1858	41.4649	39.963	19.9393	30.918
24.2535	19.9363	40.0822	30.1989	33.769	15.5119	17.4365	28.4332
17.153	31.6593	43.9663	24.0213	72.8126	7.90451	15.1055	25.4642
13.9962	19.6705	52.0383	24.3751	32.6947	54.9841	42.1517	28.4332
27.741	22.527	54.696	31.065	32.2086	15.5119	15.5338	28.1564
16.04	14.704	40.2416	46.9434	28.1585	50.7523	22.4124	32.462
27.5086	13.4351	45.3653	28.6258	25.6869	37.335	20.6093	28.689
36.451	17.7325	39.2372	25.1177	45.4532	54.2831	31.6362	23.1754
24.7255	27.6164	49.8104	44.767	31.2634	16.4658	17.8597	35.5114
29.7261	35.7647	36.5596	27.2928	33.0253	45.6175	27.225	31.7153
29.7359	9.20993	31.1788	30.7078	31.1848	19.0988	30.2443	29.4025
25.1625	10.579	31.9992	25.5531	42.9518	49.3417	25.8204	27.2116
32.4043	19.9715	63.6339	23.4345	34.4765	35.7262	27.9967	25.1478
28.802	12.1547	30.7913	28.6674	29.8438	37.4527	23.1186	26.5253
23.2935	22.527	35.0765	52.0092	19.7897	39.963	30.2742	29.4025
22.947	9.85901	36.1182	28.1684	51.6346	19.0988	15.1055	30.918
9.45169	7.01206	31.9992	32.7036	31.1429	59.3066	13.269	29.9149
24.6017	19.3462	36.6373	27.5585	46.2345	34.1899	22.3002	19.7837
21.6975	17.7325	43.0834	26.1535	23.8705	61.8543	19.4123	21.5272
30.9361	24.0704	40.4772	30.563	16.9026	63.9596	23.7428	22.0729
27.7699	12.3468	34.4167	35.9893	34.8468	35.7262	32.9215	29.9149
23.4956	19.9363	30.7913	25.6024	26.6091	30.7284	15.883	34.7705
27.4485	25.0261	36.6652	38.2835	29.9963	46.3132	39.9351	16.5304
9.57146	23.0926	38.1941	32.7502	31.1429	35.9953	22.7632	28.7066
28.0832	16.886	29.6912	26.9524	36.1695	45.6175	35.0831	22.0246
16.3991	36.4193	33.9351	19.4386	19.7897	30.4535	24.0324	39.1082
22.7343	39.436	35.0691	31.7136	24.0922	64.6894	18.1007	31.9661
20.6877	42.854	7.89522	35.5624	31.8823	51.024	26.1868	18.4872
29.7359	21.5424	7.87383	13.1326	49.5134	35.7134	18.8138	35.0957
24.3945	46.2077	34.0039	31.4602	27.9623	17.8381	29.4831	30.9639
15.6684	10.3761	28.4948	29.1348	44.6781	34.5885	22.268	52.4126
26.0698	11.7996	12.8614	19.4386	18.6832	30.7284	30.8784	27.6776
19.8578	15.0432	31.9412	31.1694	34.0094	72.4793	33.8971	18.4872
33.3675	15.3703	28.0281	27.0243	37.0924	35.7134	25.4507	41.8162
31.833	15.0701	46.7727	27.9171	18.7891	24.0053	17.955	44.4647
16.2549	24.3581	34.4323	32.0426	44.6151	48.8143	14.4247	29.2404
27.5104	12.3468	11.6402	29.5154	23.8705	38.4208	13.3958	35.832
23.2334	39.692	34.4167	31.5441	46.8337	17.8381	24.403	95.186
28.8012	14.2706	29.1685	28.6674	26.1673	37.6191	9.96264	26.1097
27.8758	26.8483	43.0203	31.065	33.0253	23.3402	30.4199	32.1074
21.0616	21.095	38.1941	27.6253	34.9508	27.2192	16.6216	91.9105
26.8751	12.8429	28.0281	20.7538	28.6772	36.6011	30.5023	31.9661
11.6907	17.0539	22.2238	30.9016	30.0902	48.0643	16.0223	21.1974
28.6987	53.1424	19.4005	32.5131	34.7585	45.4914	34.6002	30.7904
15.4421	12.1605	43.2529	27.5267	29.0447	43.5295	13.5031	25.828
30.3687	13.3152	74.1702	24.4442	19.0822	38.6229	23.9218	25.4588
16.2549	12.1605	66.972	30.5472	22.9072	38.4208	20.9727	37.7046
23.8112	21.775	41.0468	27.3906	25.4816	41.9741	21.3787	28.2751
52.0464	13.4583	23.4092	22.2529	20.4352	67.9711	28.7805	24.4162
23.8112	10.6206	25.9879	32.7036	19.5321	65.5049	26.4257	29.2404
35.5716	20.4447	36.6652	21.9224	18.5595	27.2192	30.2443	27.9472
20.5894	11.7996	33.9351	31.4809	39.699	55.2573	11.0886	49.4992
27.7699	21.775	36.1087	30.7771	60.1918	37.6191	20.2953	33.6051
16.3991	35.9022	37.3156	25.2236	25.1666	44.9966	14.4081	39.856
21.7974	29.1394	27.1823	19.4803	33.7658	26.2953	21.4375	28.6301
40.5199	21.5424	41.0681	38.8682	16.8113	45.0665	23.9998	25.4588
22.0691	39.5133	27.0738	31.5068	29.5458	38.6229	13.0122	24.4519
22.3428	10.3132	32.2309	34.8647	29.5161	55.0934	25.6526	25.828
30.8548	17.9448	38.944	34.0298	31.1504	22.1001	31.2193	33.1162
25.2272	27.2331	18.5986	15.0124	22.9959	33.6624	32.9215	22.9388
16.1281	14.3396	16.5956	12.3491	26.1673	39.5441	22.4551	26.4645
22.6912	15.8333	27.0738	29.642	44.6151	33.8287	16.6216	21.6531
32.3674	22.6717	27.1823	29.642	37.2606	37.0494	14.9051	25.7969
32.5451	26.1916	41.1957	21.4823	27.679	23.1598	36.1442	35.5588
26.8671	31.8589	44.3375	33.5774	36.0341	33.8287	14.2906	20.7695
26.9118	23.8159	16.5956	14.6294	28.1856	44.9966	15.5016	25.5648
28.7847	24.0266	13.1231	26.6851	37.2606	34.1735	22.9076	32.4805
20.5269	29.8093	32.9787	28.6211	29.7079	49.2333	21.1623	39.8547
26.1259	17.6573	46.4134	30.27	23.9329	51.5175	10.176	34.5764
25.8825	10.3132	23.3915	31.3564	34.7585	50.7703	29.793	30.7573
20.515	25.5876	37.4287	18.3531	18.2212	50.073	5.924	18.8516
25.2272	31.5555	59.3708	56.2502	49.4358	25.1257	32.9705	26.6542
28.6987	25.6939	33.569	22.3914	31.7652	50.0795	27.0022	16.9898
30.9361	23.0626	27.6025	15.9844	28.2137	32.9327	25.6397	26.2486
28.0832	15.8333	34.4152	19.4803	18.1073	37.0593	10.176	69.0521
19.1524	22.7526	57.5923	25.9838	36.1179	42.3712	16.5963	20.492
34.6736	24.374	46.4134	15.0124	57.4036	23.6967	27.282	29.7462
18.3587	36.6402	15.3335	19.6196	30.4001	38.0196	37.4515	27.4522
26.5041	41.0205	46.5278	32.0389	20.2891	25.1257	15.0294	26.4645
18.7769	28.1492	41.4753	13.6743	31.0878	51.6255	14.9051	31.0051
32.4275	26.3208	22.3308	25.1997	17.843	60.2634	30.9657	20.3562
30.0302	31.6304	29.382	28.7865	31.4706	37.0593	22.4107	25.5648
21.5201	33.1203	27.6025	31.2854	27.5489	51.9191	30.7727	18.8516
23.8356	22.6717	35.9614	24.265	33.5087	40.597	18.6709	17.9171
19.3039	42.854	14.5921	16.5378	29.5458	35.9385	22.9076	39.8547
15.8012	24.315	10.3781	21.4823	60.5726	28.7339	21.4375	17.9171
25.6413	33.7404	5.99127	31.4809	13.5225	49.4303	12.5713	37.8801
23.0007	28.1492	10.3781	24.5828	13.5177	42.3712	16.3896	27.5953
25.7698	31.5555	3.58483	31.3564	63.2988	36.3083	27.0601	26.8122
20.4075	31.7273	43.3582	17.0315	16.3299	32.9327	20.9071	20.601
26.7423	25.4831	26.8028	45.036	17.8115	50.4216	18.1478	20.7012
24.7613	39.5133	24.4675	34.8842	31.8505	42.7425	27.3817	16.9586
21.7974	28.2388	62.2898	15.1662	10.7708	37.1704	25.2424	31.555
29.1148	24.8103	42.9823	21.3486	46.5938	54.9398	24.5005	29.7462
26.735	16.3275	27.6248	19.9799	37.9304	40.3536	25.6397	14.7306
19.3117	18.9418	44.3375	17.4841	33.9197	21.9099	25.8975	23.2361
18.0914	22.7044	37.3944	18.1973	27.5489	30.1677	24.9381	26.4495
27.3039	26.2322	35.8282	16.2699	28.1565	24.2962	7.53271	31.9255
24.5404	24.8103	40.8449	27.1726	42.3281	38.1022	32.1417	28.2686
28.8598	40.0911	29.0643	18.5912	28.5031	38.0184	27.9937	30.7001
25.1929	15.7156	29.2103	24.5162	12.7521	39.4741	25.7175	31.2091
24.2925	42.9981	39.9588	16.5378	29.3987	28.7339	27.8334	24.1566
32.8976	25.277	32.0798	26.7688	32.9898	24.2962	11.2951	22.1545
23.7991	16.9656	45.3767	14.3365	25.637	41.2081	26.2886	19.5289
23.6225	20.8867	29.382	15.771	25.5416	50.4216	25.0633	27.2632
18.3587	35.13	32.7487	13.8475	26.6479	39.4741	11.2951	41.4313
26.735	26.5731	29.0643	28.6211	35.0417	29.7113	19.6561	25.0779
31.904	11.3734	37.7995	24.265	30.0596	15.7895	29.6359	34.653
40.8225	24.3125	36.2749	15.525	31.8505	35.0356	21.1727	25.1047
15.9577	19.3531	46.3761	15.5853	23.9145	11.8283	24.7154	32.9285
14.7077	10.9141	30.6977	19.908	15.8478	33.1003	50.3337	28.6269
25.7698	18.1078	30.2707	21.3354	20.8563	19.0125	30.7727	25.0779
46.9149	30.1662	38.6801	15.0361	15.8478	42.8028	27.7672	22.3525
15.1653	18.3611	32.9881	24.6363	31.6675	73.8736	24.9363	26.1801
14.4953	9.84107	32.3044	27.6626	30.604	11.8283	19.0697	31.4467
24.6846	26.5731	64.1836	26.8668	30.604	54.6702	17.3984	28.6269
26.2206	10.9141	45.3559	17.5944	23.1948	25.5713	27.6714	20.0404
45.6771	19.3531	40.8449	17.2332	57.4036	11.261	26.2886	37.8801
21.6326	20.7078	58.2817	18.6625	47.5224	52.3256	23.442	27.4712
27.0828	16.6584	13.5395	19.9799	23.5215	29.6786	28.6012	28.2686
12.7045	29.7564	18.2883	19.6768	25.637	47.1364	27.5027	28.7097
23.6065	28.8989	16.3214	22.759	30.5209	36.0457	28.2127	25.5123
28.873	33.838	35.2073	17.3481	36.7358	20.6246	27.7289	19.5289
21.3721	30.4935	36.1201	26.5876	32.7137	54.6702	17.7682	31.4769
24.7619	22.6034	40.3312	27.1726	31.3053	48.4661	24.6194	25.6101
34.0257	50.6509	39.8017	13.5467	34.9822	35.8058	37.4515	21.6368
18.5638	21.3497	19.906	18.872	29.8089	44.5894	27.5204	27.9092
13.5569	28.1749	19.906	15.5853	26.1887	28.919	17.9209	18.9117
24.2281	25.2161	25.3132	28.6164	30.285	33.5556	25.8975	25.554
27.7513	37.9558	32.9881	20.4082	31.8381	16.9321	23.7843	23.5348
26.5548	11.1152	41.9509	15.525	33.5849	20.6246	37.8954	29.4666
16.9563	16.6584	13.6947	18.3715	25.7924	42.9635	23.8253	34.653
33.3405	19.7961	6.98642	16.8242	35.5471	38.0179	25.3438	32.4571
24.9349	22.57	16.3214	19.6768	30.0191	42.2258	11.6174	30.2221
13.8672	22.2004	30.3592	18.8781	23.5215	56.4109	26.7923	21.6368
25.0225	9.85846	17.8913	25.2561	22.8936	52.396	22.8226	22.0648
24.3296	21.1117	13.6947	23.8153	32.01	42.8028	9.36149	34.0325
23.8997	39.5711	26.1727	18.9249	29.8089	157.108	37.852	28.8301
12.2251	12.4717	36.2749	15.2073	26.1887	51.0949	46.9152	38.4354
27.0828	25.6256	56.9013	18.6625	34.4524	45.5298	25.0023	32.6374
33.1032	32.6971	35.1477	17.847	32.4096	45.5298	15.4597	25.6101
19.1801	21.3497	9.69527	26.3369	30.8497	68.1122	13.0189	20.9495
26.9256	16.6986	16.1987	24.6363	27.8201	25.3648	17.3872	23.9324
45.8364	30.0934	46.3761	15.2766	41.086	61.4292	24.1359	25.554
32.3997	15.9641	44.934	24.1587	29.7714	54.0242	25.7419	19.2747
24.3296	21.6642	26.1727	19.7148	36.0661	38.6042	38.7158	28.4998
34.4909	36.5015	17.9216	17.5405	25.443	42.2134	27.496	31.3561
32.3997	16.8854	31.539	19.0426	25.0937	48.4661	11.9172	19.819
24.9349	36.7307	38.6801	26.5793	33.671	34.8568	19.5739	22.1211
20.7996	13.8414	17.8913	26.8668	30.2965	68.3274	11.6174	19.683
19.3218	17.7534	42.18	19.7384	51.2502	48.3113	17.809	26.1762
21.1716	35.1777	18.1364	23.8153	35.6537	44.3447	25.8617	25.7062
27.2612	17.2357	39.571	14.3938	51.118	42.9635	27.5027	34.0325
22.5725	25.6228	11.1902	28.156	30.4514	46.9449	24.5684	30.2221
16.1453	29.9103	35.2591	32.5594	18.9477	30.5401	38.7559	28.3405
22.5862	18.6618	32.1986	16.7307	28.3133	30.6741	26.4034	28.3405
40.8225	24.682	34.9433	15.2689	31.4033	36.9588	24.5684	35.798
23.6099	18.0601	10.4711	19.9871	16.8508	54.6532	32.5209	25.7062
19.6704	11.8553	27.4695	15.2766	27.4437	64.3347	12.6676	58.8704
15.7725	21.1117	25.8301	22.6169	31.1387	14.9208	31.6037	72.0017
40.7655	12.4717	25.6221	41.7634	31.3093	23.5175	20.8345	28.4998
56.8601	31.3076	34.8536	11.5999	16.4425	23.5175	19.5739	27.4807
22.7646	24.6496	41.3064	32.5083	18.4855	41.2162	23.8098	36.2223
16.423	18.9195	31.9622	13.7546	16.837	21.5502	28.6848	28.0028
19.6704	25.7943	27.8582	15.2932	31.8381	23.4527	24.5974	17.9201
22.3538	18.3417	11.1902	12.9162	14.9819	42.4253	17.3339	35.2863
33.3405	19.7678	37.3486	20.8152	31.4033	33.556	20.763	45.5877
12.3347	22.0717	35.5705	32.5594	27.4437	18.5619	16.3139	23.5581
28.6585	19.3461	37.1563	15.8466	32.3228	27.7016	13.4163	17.9201
24.6377	25.7943	35.8303	28.795	36.7778	47.6577	22.5364	18.0834
26.4837	17.5309	27.8471	28.6462	30.8497	37.2406	19.116	27.5134
25.8207	23.6805	13.7491	13.993	16.837	29.906	26.9608	29.5859
24.6687	37.8597	22.2153	14.8783	61.124	23.4527	22.1104	32.0076
27.7592	21.6189	7.61242	12.9034	32.2855	41.9836	12.6676	19.1062
22.0059	20.3405	25.6221	18.9027	16.4965	83.4093	29.9846	24.9398
13.6675	16.7424	9.95194	13.2413	14.2851	41.9836	27.066	58.8704
17.3382	18.6353	32.8804	19.7384	33.2107	31.6039	20.8345	36.3265
21.2506	16.4807	32.1986	24.6704	25.0937	38.6543	38.7158	22.6183
24.5317	18.6618	27.7323	22.8252	32.4096	38.313	21.3092	25.7237
29.2993	15.7499	9.95194	26.1079	31.2103	42.5325	19.6792	28.7265
25.0727	33.4628	33.2386	16.1711	32.1028	43.8163	24.5974	20.3069
32.6126	35.9888	28.5803	19.2451	23.9804	15.1049	32.5209	34.0248
26.3581	32.6786	17.0392	13.2413	31.1387	15.1049	47.561	19.5618
21.6687	23.8723	34.9433	28.9524	16.3482	12.2811	22.5085	25.8583
25.4986	20.1506	22.2153	13.993	29.984	58.8832	35.3781	15.5185
32.3148	35.4747	33.3737	17.9759	36.0661	37.2406	20.912	29.3199
22.3412	19.7678	25.3652	25.1009	35.0048	29.906	20.763	24.4939
21.8071	18.1677	43.636	21.2383	33.671	25.2884	19.056	20.3069
12.3474	36.912	37.7364	19.7655	33.7623	48.6395	35.0846	53.4719
24.9059	12.551	43.0359	84.6981	31.5323	64.335	13.4163	23.4116
13.4276	23.9222	54.2886	14.679	21.9022	50.0764	26.1415	18.9158
21.2506	23.6805	35.3185	27.2485	71.4559	73.1087	24.543	11.0139
24.1327	21.9558	37.3486	33.3431	23.8964	47.7466	42.4013	21.2696
21.3177	16.324	27.4457	13.2875	29.3681	46.5281	25.9829	34.3444
26.4007	30.8017	31.2302	22.7156	17.2735	73.3935	24.543	26.912
26.4007	27.0881	27.7323	16.6426	34.0253	57.8615	26.7633	30.1699
26.8151	15.7549	31.2302	28.156	33.8752	48.4198	16.4369	32.0076
23.5588	41.4727	33.3737	13.665	24.9989	56.2284	38.0742	29.1821
25.0976	21.3808	33.0722	14.7971	34.4559	42.0372	22.4007	23.2195
25.2035	24.9393	22.8362	36.3211	26.0854	35.2312	26.8805	21.5876
24.6687	30.8538	19.4401	20.6476	23.9804	47.3403	21.3092	25.7998
17.1592	98.684	37.5222	18.4177	23.0124	35.5824	15.1811	32.2782
27.4952	17.9166	21.1877	28.6035	15.1913	32.5686	25.5181	18.9158
21.6687	24.1649	33.0722	14.9055	25.8137	19.2965	15.992	50.8391
30.314	36.0636	31.5956	16.4661	30.4859	40.4749	19.7488	26.4565
18.4574	16.7108	35.5137	28.0813	51.118	49.7414	32.0325	25.952
24.4761	32.4983	21.673	20.9456	25.7585	44.7626	26.9608	36.1749
36.096	20.9544	34.0846	18.4177	30.7483	42.0372	16.4369	20.0158
10.5334	20.1506	26.2717	23.1813	21.9022	35.2112	20.9677	25.7913
25.4986	29.0152	47.3744	14.7457	27.2053	60.4396	30.5284	34.5191
30.0235	29.5459	27.4891	20.428	26.8824	113.943	19.056	16.6669
25.0727	22.7983	52.1478	22.9854	29.3904	31.8053	17.5006	23.8566
25.4882	33.9974	48.5629	15.9783	22.6047	37.1714	27.8342	8.97038
19.0518	21.5	37.1872	31.8921	18.3964	32.5686	25.2641	27.0276
33.8695	19.2551	11.502	14.7772	21.7107	39.4387	25.5181	8.97038
30.8597	31.5025	21.673	24.6704	14.8948	29.498	24.7702	24.7853
34.5558	32.6714	26.8342	21.1839	24.9989	35.6672	35.3781	25.7913
21.6097	19.3709	39.8165	24.844	23.1502	44.1624	36.5745	22.7011
24.5994	33.1273	26.1694	17.635	30.7483	39.1704	14.9297	13.3728
23.6516	24.0021	37.4498	17.8889	18.3806	47.4429	21.0809	17.5045
18.279	30.9942	43.3534	29.119	24.233	40.487	15.2094	27.6242
25.4882	23.1774	24.0391	24.0897	22.2154	42.3899	16.5962	56.406
22.1179	35.4747	37.0204	13.7013	24.2205	41.659	25.6702	30.314
22.1092	29.5459	20.4852	13.455	23.737	33.3515	22.6503	20.0158
28.0252	32.1429	53.0713	16.2222	21.7107	27.149	32.1819	16.6669
28.0349	29.004	26.2717	15.9907	31.2207	39.4387	15.288	26.4565
17.2793	28.5125	43.9617	25.4606	23.9568	52.0348	32.9674	24.9634
11.5258	26.1667	51.9893	23.8358	31.0508	28.0043	14.7992	27.8356
17.2793	23.7523	30.9539	34.9931	57.9846	35.004	18.9273	32.2782
17.7903	27.8792	50.2202	13.8403	24.9746	45.6327	25.3386	16.7397
16.859	27.8792	24.0391	16.344	18.3806	14.2503	25.6702	28.3156
24.3416	28.6066	44.6449	20.6476	48.9932	14.657	18.7235	27.9346
31.4396	19.3709	37.1872	16.2222	20.2678	50.0366	30.4402	16.4606
30.2251	19.2551	59.9124	44.6421	22.8645	47.4429	41.0731	18.7339
25.4681	25.6944	24.9094	31.2598	20.2678	33.3515	32.0325	34.2515
23.2021	26.9204	33.0913	20.2259	34.4507	66.7354	31.6104	16.3974
22.1179	32.7654	44.2028	30.7483	27.5913	48.2956	22.6503	38.6896
22.1092	25.1593	39.7614	13.8403	23.1502	48.7556	21.127	38.5127
31.3785	34.6761	45.1919	16.7163	21.0767	32.0282	18.9273	17.5222
22.0091	34.6087	33.2667	28.6035	33.8752	44.5456	20.7529	37.3246
26.2994	43.0243	21.9701	25.4692	36.5864	77.3917	35.591	21.0855
24.5994	41.5664	36.0604	38.9441	26.6717	59.8618	20.0422	33.8462
16.859	37.1568	39.8574	53.6672	26.8824	50.0366	32.7871	21.0855
18.1587	26.9204	54.1782	26.7633	29.605	49.1592	28.9127	20.3503
23.6481	30.8714	38.498	21.6428	29.5516	75.7269	25.5416	33.4699
22.6198	40.2749	41.0552	33.2268	23.9568	16.4797	38.2085	32.3205
18.6311	43.6063	47.8589	16.7751	16.3439	20.6071	14.7992	27.9346
26.8402	19.3743	34.9538	19.6869	29.605	20.6071	67.061	43.2997
46.6665	20.4422	14.8784	16.5658	29.4798	50.2116	25.0372	29.2631
33.4833	30.6685	36.0604	22.9854	30.1766	45.0733	30.8867	38.7807
27.2533	32.7654	30.3653	21.1839	30.7451	53.6335	16.0703	14.7417
27.1633	16.5934	43.8257	15.6459	24.233	50.3315	22.0687	26.9341
30.1578	20.6695	41.2652	20.9753	29.0915	47.4068	25.6308	22.0304
14.4295	25.1593	33.2667	19.0476	24.2205	37.5336	27.0501	17.6568
18.1587	31.5887	21.9701	21.8283	64.2623	54.4241	24.8106	27.6327
25.3372	28.6066	40.4068	27.8396	42.9559	38.5273	25.6692	30.0729
20.9844	30.9612	31.2854	19.3912	19.6402	34.5869	30.6802	33.4699
16.7699	37.9657	40.4401	19.0432	29.0915	38.9562	14.1752	24.154
19.4737	25.0407	25.0517	35.2587	27.3224	48.2491	72.2803	75.4161
22.9499	25.6944	25.0517	17.9419	48.9932	32.1723	26.3504	19.6211
19.6563	30.637	43.6161	14.5558	19.0415	44.881	24.5413	24.1666
39.2602	29.6644	35.1226	20.8197	19.0415	44.0679	21.127	19.6211
25.9685	37.8033	33.8464	25.0408	32.2976	42.1783	33.4974	56.7638
23.7642	27.921	34.9538	19.0934	25.5492	24.7017	22.0687	15.4216
14.3585	29.5233	40.4401	33.594	27.3224	71.7488	26.6006	18.5715
15.9118	24.127	36.0159	40.6675	36.6118	46.8572	29.2371	20.5605
24.6621	26.0885	28.0669	20.9753	21.9759	75.7269	21.792	28.2193
19.4737	42.6236	22.6146	31.8921	28.7459	54.3698	35.9084	22.0644
30.1578	25.6132	38.3427	14.6241	32.4215	30.184	27.0501	21.2765
20.6134	27.8257	45.8373	13.2661	11.8625	23.548	15.4415	29.2965
25.0741	29.6292	38.917	17.5135	29.9198	37.8046	19.1919	23.1342
23.4895	21.9128	50.9186	32.0981	27.9734	44.9868	23.58	31.687
23.4895	24.5902	22.9436	17.0373	15.2538	41.2414	24.3872	36.9402
19.9133	29.6292	42.6669	35.7237	32.6692	51.7197	27.5577	28.7904
103.471	37.8033	36.2226	34.7983	32.7598	20.0458	21.3481	23.2062
23.1255	39.4223	41.18	14.5558	37.8203	24.7017	29.3517	28.1482
19.1539	30.8751	38.917	33.7507	11.345	20.7379	10.2607	23.2539
24.2372	25.6132	31.0702	17.0373	24.6771	38.9562	32.5753	12.5663
22.8745	24.5902	48.6793	26.815	28.4404	40.7237	23.7303	37.1395
23.4621	42.6842	45.7666	13.7237	20.4624	15.6207	15.7068	15.4216
24.883	25.5895	28.0372	27.3406	44.9049	20.2881	15.9436	18.113
39.2602	31.5752	13.2567	17.5401	38.3942	43.886	32.064	18.8659
36.7019	24.127	33.8464	19.3274	31.6665	27.3994	27.8368	23.244
21.5439	21.1996	22.9436	20.788	27.9734	20.0458	39.0643	10.1785
32.7206	52.0452	35.1248	14.5248	37.7458	46.8572	23.7303	25.2811
25.7581	29.8112	49.2232	24.1984	25.1541	35.2054	24.2595	15.6411
25.2774	27.6078	41.5729	27.8024	17.414	29.4571	23.3109	18.113
26.3945	18.0158	36.0159	15.2458	31.325	35.2054	52.2056	31.687
27.9592	21.1996	27.8741	14.6241	11.345	28.6107	27.0267	18.5715
19.9133	27.5172	34.6181	29.0624	14.6471	41.2414	35.3991	39.6162
29.2209	23.9571	33.5441	15.6302	31.3035	44.9868	23.9826	16.5254
23.1255	23.1638	40.7754	21.6045	29.6196	60.3644	21.524	18.0924
24.3392	18.932	25.4112	24.6738	25.276	30.8371	19.4744	21.6032
44.9867	37.747	38.2787	25.0408	19.3587	43.1944	22.0799	37.1395
24.5381	28.9503	35.0274	19.0324	28.7459	40.2922	29.3517	30.3093
19.3678	22.642	41.6488	17.5135	13.8032	38.8539	36.1745	32.9132
17.1242	20.9335	8.71752	10.0361	29.9198	63.5735	32.5399	16.1602
33.0062	21.1568	8.71752	18.3958	25.276	28.6708	27.5577	19.8829
26.5639	22.2475	18.4291	20.1577	29.7571	50.0298	32.5399	28.0667
25.204	34.4649	41.7464	7.7702	27.1869	32.7783	25.6332	23.1342
27.634	9.41604	30.6576	42.6465	20.4624	35.4585	25.7697	16.5254
24.3392	37.5804	48.8087	10.0361	64.0513	31.8767	29.9117	18.926
45.0369	50.1937	45.7666	50.2177	23.9667	42.7181	32.1185	23.8614
15.8374	41.783	38.9114	23.851	18.1032	30.5816	25.6633	49.5093
29.2209	9.71151	22.5265	15.7413	47.3103	42.6835	35.9802	30.5605
36.7019	18.0158	12.391	30.7547	60.8026	43.2179	19.4744	27.1974
15.6173	9.71151	12.391	19.685	25.4668	105.012	30.9484	27.2114
23.1285	24.3792	25.2728	20.3032	22.1299	108.093	36.6252	21.9683
30.8808	28.6469	33.1948	22.7308	18.1653	24.1737	29.5867	31.1117
41.2325	22.8707	44.0639	16.2213	30.2089	27.6629	25.5865	24.147
26.5104	27.6078	47.0807	15.994	25.1541	35.3806	39.3056	34.4006
25.5816	19.0111	14.7516	27.8069	20.8762	38.8539	28.9334	29.1279
23.1285	23.9635	40.0777	18.4715	22.0968	29.2027	35.5351	23.2856
27.0455	29.2569	56.2383	18.0289	27.4055	31.409	29.2964	23.8614
50.7077	25.4327	30.239	49.4795	26.3978	43.5934	51.1785	22.5699
30.5982	23.9265	38.132	15.6971	28.4034	35.3806	22.7364	16.4329
32.0538	24.2513	48.2113	15.5237	17.8761	26.6531	22.6978	33.7123
36.6818	23.7453	23.7019	18.6559	28.884	29.2027	31.4405	46.706
23.3942	25.4327	25.4112	15.9184	28.1931	27.5709	31.614	27.39
29.8507	27.5459	30.6576	36.0003	21.4067	39.8081	25.5865	25.3434
77.3701	36.1767	30.7881	27.3905	29.7571	40.175	32.372	14.3926
39.1716	29.8711	36.0961	38.4216	20.0233	34.4903	36.1745	24.1538
37.1445	20.3657	31.6876	9.25743	16.3979	27.5709	25.3675	31.1117
31.5092	23.557	18.8245	11.3175	31.3851	50.4622	33.0695	40.1952
25.3941	27.0951	22.7074	27.907	28.0965	50.4761	20.6882	33.7123
57.6559	35.2734	45.9949	24.2328	21.3614	36.3044	55.2805	27.2114
43.0948	30.8684	41.104	13.9118	15.6522	39.6551	38.4872	13.8568
28.63	23.2154	23.7019	12.568	24.5871	23.3608	15.9985	29.1279
31.221	62.4664	33.9282	27.3406	23.6522	25.343	24.6981	29.3798
36.1653	23.9635	32.9447	11.3175	30.2089	55.9845	22.7364	22.5699
27.0475	30.3484	41.1268	17.3294	26.6997	57.6402	37.8235	22.5528
28.7955	9.56621	33.1948	30.1319	70.4153	40.8091	34.6745	18.1568
8.51703	16.0707	30.2612	37.9749	16.5144	22.3299	21.0249	46.8158
31.3831	37.9581	30.2612	25.2376	28.4034	45.6122	18.5205	44.1217
4.45206	16.0707	24.6412	20.1577	24.6705	30.7679	29.5867	31.1593
39.0399	25.5085	24.8538	24.3152	16.57	31.134	22.6978	32.0398
8.51703	33.8429	29.4131	35.7237	16.57	57.8788	30.903	18.1568
26.5516	20.3657	41.6488	31.5911	29.3601	27.6236	28.5937	25.9534
48.6369	18.2348	29.4131	25.2029	66.9306	50.4025	34.7278	27.9805
17.9783	26.0253	54.4286	25.5569	22.0968	27.6236	29.1058	26.7432
11.4343	48.2385	38.5682	8.96618	21.9848	21.92	14.2568	29.8415
21.7207	26.8081	28.737	13.5541	27.4055	93.5325	20.6882	40.5445
25.3941	24.7453	15.7144	18.451	20.929	45.2466	36.6252	22.9345
22.0528	27.9093	44.1868	20.1362	31.4344	22.3299	14.2568	28.0725
26.6785	35.2734	28.5212	17.9093	47.7985	32.5496	11.6125	47.3166
37.7461	21.2008	29.1344	23.851	59.4803	53.9969	13.7469	36.7334
15.9625	21.3643	32.9799	15.2336	31.7038	48.72	38.2021	21.9298
24.5824	26.7218	25.9711	18.451	26.3978	37.5867	32.5102	27.7162
23.8333	22.2954	44.9975	15.9002	16.5343	64.4742	35.0495	31.0363
64.9805	29.5881	60.1576	13.9062	28.0965	64.4742	33.0695	22.5528
15.9625	23.0616	24.8538	8.13865	27.6345	39.6494	18.4696	38.6938
37.0131	23.1033	32.9447	30.6877	54.737	24.6091	23.7648	31.9886
17.1834	30.4998	37.5064	15.1585	25.5141	38.1826	13.7469	21.9298
32.3643	22.3321	29.1344	22.7308	47.7985	47.1619	30.0723	22.9345
35.8601	33.3954	30.0135	13.9118	29.3601	44.4303	21.4768	15.4646
25.5609	10.7582	34.2427	21.89	22.611	49.0446	33.1085	26.1225
31.3831	22.8519	38.6387	14.4703	15.9609	50.4025	43.5922	27.43
27.0475	5.79165	31.6723	15.2336	19.7594	70.1259	29.9103	20.1031
28.9112	10.7582	42.1582	30.0851	31.6603	40.7708	37.3484	27.6167
50.1793	18.1181	36.3016	13.9062	26.7051	15.0303	39.9189	37.3771
13.0795	27.9636	13.7385	13.2726	18.4413	32.3392	32.6427	18.927
73.2516	28.8532	34.4943	16.4962	19.372	24.6091	33.1085	33.541
48.6369	14.4391	28.855	32.1338	32.8183	44.4303	40.1086	24.825
26.7801	15.1397	14.3535	20.0746	29.3311	48.72	33.6075	30.8575
17.9525	33.8429	42.0343	27.251	20.31	51.8646	31.0569	46.706
26.6606	35.8813	14.3535	27.3905	14.7003	40.9816	39.2495	26.3867
68.4644	24.7633	36.6515	64.9172	21.9848	32.3392	39.6912	23.9278
32.035	27.5054	48.3163	20.3637	27.9165	45.9963	32.4077	59.0068
17.9525	31.3147	24.5104	19.9745	23.8318	32.0715	21.9322	33.2664
17.1834	44.16	54.4286	19.3896	28.9512	36.8657	32.4743	30.093
14.3503	27.5054	18.7341	13.6547	12.5618	31.0754	39.5098	32.1412
39.0399	26.2634	41.7409	20.0028	60.1343	28.7082	37.72	24.0602
15.7758	35.4915	20.9192	27.9789	17.9749	44.1465	35.9085	26.1565
27.0089	24.9793	19.5479	20.9726	12.7965	47.1619	48.5594	25.0583
33.4331	32.2443	45.9063	15.7322	17.327	39.1842	40.1086	56.2862
26.7801	21.948	15.3575	19.4377	27.7406	30.9405	36.1765	31.3666
41.4322	26.2549	37.5998	14.7225	19.1752	46.0332	40.4045	33.541
32.3231	38.2473	40.2238	42.4209	27.5672	42.1921	46.5305	26.1225
16.7333	33.4816	29.2302	31.6669	26.5315	42.3286	41.4868	37.3771
25.5609	20.7356	39.847	17.4465	70.9354	44.1465	38.9795	31.7559
24.9803	28.8999	27.2595	26.4415	22.8517	41.3984	38.5978	20.6855
51.9196	20.7356	70.6777	27.7643	26.7051	43.2618	38.8144	34.261
43.7144	18.0386	8.42768	40.1926	26.5588	44.3602	31.4026	36.8455
25.2145	28.6708	30.6998	16.946	26.5187	65.9823	36.9513	26.5205
42.7289	45.293	31.9328	15.4613	40.7052	54.7248	38.1145	25.5537
42.7623	33.1032	36.0987	29.0164	18.3978	40.9816	38.4059	30.9483
30.1014	16.894	15.3575	53.626	62.1056	41.2838	40.0339	17.9271
32.3449	10.2185	25.0433	17.9553	15.5701	42.3286	31.7123	31.0912
30.8983	29.101	34.6323	14.8617	28.4545	53.568	32.4743	21.0657
28.9399	21.948	30.6998	16.4599	17.9752	47.8868	39.6912	24.0602
24.9768	24.9793	29.8838	14.9438	23.2265	59.3627	42.88	30.093
32.1957	27.9308	34.6743	38.7158	25.3742	57.6837	39.2495	26.3867
28.3789	19.2499	23.6147	32.1164	19.862	42.1921	40.3553	25.2172
25.1162	33.8487	32.5166	17.1068	31.7494	38.3555	26.6356	34.0319
84.8143	16.1851	29.5042	15.6969	17.4599	64.7673	24.5678	31.762
35.7044	15.3027	33.3262	18.6498	24.3535	42.8835	44.6996	26.7858
23.2147	14.1829	37.5998	20.9726	33.5451	53.568	44.8347	23.8893
39.6873	32.5782	24.1512	17.4465	29.118	44.1151	41.3337	28.6529
28.3789	32.2443	40.2238	32.6192	25.3158	50.8091	29.3827	29.0746
35.8409	27.4357	24.9675	14.7225	66.5094	36.5499	38.9795	48.5094
41.0219	31.2341	42.7198	35.9499	21.1537	14.0775	38.5978	23.8893
26.4625	25.4389	38.8324	20.3637	24.7393	14.0775	32.4255	31.9108
30.1205	30.3575	55.7737	22.3673	22.8517	32.4264	68.1478	20.6855
31.3348	35.477	44.3553	16.4542	33.411	47.8515	33.3968	34.261
93.5238	33.3315	41.9105	18.9622	59.4062	45.5956	40.9493	40.4404
26.6311	25.9635	30.6639	17.4141	30.8101	38.2038	35.0089	25.1843
27.2117	20.6732	54.2061	22.3093	26.7776	38.3555	24.5678	24.0414
28.9462	31.8577	34.6323	17.1068	57.5312	14.0136	44.6996	25.9867
30.8177	32.4203	19.4563	17.9553	26.5588	65.9823	28.0266	25.9867
42.7623	24.6683	15.0271	26.3404	17.4599	39.3792	25.1499	15.8855
72.813	40.6566	60.8151	23.5699	43.6813	44.8361	34.3094	31.9197
32.266	21.8813	10.2773	15.6948	26.2457	36.9493	41.7657	17.5699
24.1412	32.7097	26.9755	30.0851	20.7305	38.0985	28.0266	32.647
31.3348	30.6232	47.3217	38.7158	58.8264	44.2127	43.1373	17.5699
46.8942	24.3668	45.6818	22.3673	16.4717	33.9072	45.131	41.3739
27.2117	42.8492	19.4563	27.1959	38.9925	42.4004	38.3298	32.0013
15.1879	22.1695	24.9675	16.4703	18.9897	38.2038	33.7908	30.5776
45.024	19.9991	43.7912	32.7004	26.5318	48.3765	39.7045	25.0092
22.1641	31.5287	44.3377	28.1964	22.6248	44.8916	29.3827	33.2194
32.1938	30.641	10.9418	23.1331	37.5252	47.8596	33.3902	38.7594
27.2671	30.6513	26.8696	12.1121	26.0358	36.9493	38.4653	27.2977
25.4439	23.9591	6.559	13.3985	29.253	42.3471	35.9354	32.1356
46.3196	28.1822	34.3755	19.6117	19.9635	31.9536	34.376	33.9033
12.8854	22.6456	10.9418	25.5355	14.7951	29.6375	40.9493	52.1588
91.742	35.6442	34.6594	8.49336	40.7052	44.8361	116.523	29.6864
20.6341	23.7082	35.8302	31.7022	26.7138	40.9146	34.3094	20.8437
32.1938	21.5536	41.6491	12.4299	34.2937	39.3792	28.0615	35.3197
32.9469	20.64	35.0572	18.6498	18.7243	76.7714	45.5092	27.3603
12.8854	12.54	46.3937	13.7401	30.2983	47.5267	38.4653	35.5744
20.6341	29.3734	29.9946	27.3414	21.7568	55.6204	45.7816	30.5776
35.6194	25.1541	37.7826	24.9303	23.8257	33.9072	42.1818	31.1431
31.7609	27.9455	34.8724	22.4029	12.055	47.3286	33.3902	31.9108
24.9599	44.151	22.9496	16.1186	24.0954	47.8596	42.7874	25.4021
10.4	15.8694	25.3936	19.8407	17.5329	40.398	31.2893	18.5153
26.2287	20.64	65.4724	31.5893	32.8281	60.7099	28.1288	25.5484
16.4539	25.3634	44.2832	32.7004	21.9193	65.9124	33.0249	33.9241
34.491	20.3353	32.5945	15.6015	15.8114	42.9817	32.7706	27.3603
29.9539	15.8694	41.3853	18.4871	12.9977	56.1518	35.1575	25.0092
49.6675	19.6994	54.2061	32.15	10.2196	42.6385	21.9019	25.6897
46.1124	22.046	35.5825	15.4217	26.5508	37.1027	32.7706	33.2505
57.4162	24.8481	37.3443	20.8703	23.6865	39.9614	37.2827	27.3874
26.7101	28.129	41.2718	23.0934	18.3827	85.333	30.645	40.3521
41.6586	18.8212	22.9496	19.363	30.8142	33.1889	28.0539	20.0667
28.5677	34.8382	25.7412	24.8853	45.7882	39.213	29.643	27.2977
59.955	31.2142	60.4722	14.1507	19.9635	43.3832	36.0311	24.8535
32.4606	22.0112	39.2301	24.5637	25.8951	47.3607	106.586	29.6864
30.2311	32.5512	56.2206	21.3758	11.3763	46.3525	37.9081	23.8224
44.2666	26.6271	40.8301	15.5564	20.5543	33.0748	37.1936	16.378
51.429	23.5056	37.3385	22.1367	26.7783	55.9838	34.0842	58.7578
29.6945	14.8727	39.2205	28.5575	21.7568	35.5155	31.9292	24.8535
28.9601	25.1541	53.2338	32.6713	37.129	36.9109	34.43	33.2194
35.932	32.154	112.412	23.2757	14.9994	24.2767	22.2989	9.10297
33.0694	11.0892	36.6728	21.6362	48.3652	65.9124	39.1834	34.2472
30.8936	19.5605	27.3323	16.8725	17.2029	27.2562	32.3524	37.0211
30.3748	13.5434	73.2189	42.4209	51.4169	39.566	44.8277	21.9595
43.8581	13.9679	33.8587	21.8095	17.4211	29.7835	22.7474	36.0086
26.7101	25.9295	37.7717	32.6799	20.7773	39.5046	22.7474	32.2392
33.6595	20.0556	33.6605	14.8627	34.7032	22.9232	28.6936	22.8557
33.3675	22.5673	32.5529	15.7846	38.0206	38.9077	35.4989	35.462
53.0573	31.5738	42.1747	14.4417	15.36	28.0221	34.2932	16.378
32.7412	37.0642	35.4673	28.3225	28.6817	31.6475	34.1159	24.8142
32.3474	18.9536	35.58	27.9607	18.8697	43.5758	20.6479	32.392
57.4162	26.3496	32.5529	24.6124	18.2199	40.9145	25.9062	17.694
40.6773	11.9552	32.039	14.1507	15.0373	17.4507	20.6126	18.2738
45.7998	28.511	51.6056	21.7612	12.7448	22.1285	26.3776	42.2009
42.3281	23.5056	37.8123	19.413	36.4381	39.5848	24.6483	37.0211
31.4551	15.7179	31.9943	24.7164	18.1403	31.1869	28.2966	29.8485
36.9922	28.0584	52.9489	23.715	16.7698	44.6815	51.7494	27.3676
23.1653	21.2021	43.5634	10.1039	36.0052	46.1111	28.2411	41.376
38.0702	18.9292	36.6728	44.6759	14.9994	37.4397	10.4282	17.694
42.198	25.8807	37.4272	23.4668	18.677	33.2212	34.0842	33.0464
22.0977	22.6076	53.2338	27.2783	37.7728	32.6951	38.6906	97.8492
34.3648	32.487	38.2533	21.1968	25.8951	13.6575	26.5726	23.8224
20.5632	23.0406	36.8701	14.4417	13.6064	46.0026	24.3498	36.4852
30.3748	13.8445	34.9747	24.737	21.6434	28.0221	51.9883	37.0969
32.6824	17.1177	38.9677	7.19963	25.0092	17.4507	35.515	19.8647
35.8301	21.5722	32.3011	28.4398	17.4211	23.2484	10.4282	37.7361
33.0694	28.0584	37.3087	24.7164	17.8873	45.9865	22.0027	104.555
24.7961	20.0556	14.4466	21.675	15.36	22.1285	24.8771	29.3729
29.5322	12.5836	45.1743	23.0934	20.7773	46.1111	30.9001	31.6097
23.1653	10.1339	13.1278	28.4398	42.744	20.6233	14.6025	38.1708
28.2445	15.622	59.4328	19.3433	13.737	33.2212	31.3018	21.1522
31.4551	26.9991	14.9828	24.8853	27.0595	28.46	44.4404	22.5014
31.247	21.8131	37.4354	21.675	18.8697	30.2142	47.9527	29.228
39.3621	21.5004	17.3031	20.5805	27.7485	39.5046	25.1899	33.4297
33.0521	42.2418	42.0015	26.2308	17.8205	45.5347	28.2411	35.3886
21.6908	22.5007	11.3844	22.8566	30.9321	41.7528	24.8142	19.8647
31.264	28.511	47.4424	32.15	17.8727	31.6475	19.4621	32.8779
36.2017	28.8369	12.1556	13.5918	21.4514	51.6855	61.8563	24.0359
30.6554	15.208	38.9677	16.6099	19.5274	49.2923	24.3273	28.0095
24.7961	19.2595	17.3031	21.6744	35.2007	46.6829	23.8944	31.3698
25.5357	18.8385	12.7024	21.0324	27.9951	28.2994	34.9511	34.689
33.1732	9.09583	9.73733	20.6555	30.8278	37.6483	23.4675	37.8644
31.6967	27.4304	34.9145	12.5648	18.1112	40.58	24.0188	44.5878
29.643	15.3092	18.8513	22.1367	39.9138	42.927	25.1899	31.7522
26.6199	28.2077	29.9432	24.2109	40.4667	44.6761	26.1762	40.4123
29.5322	22.7126	26.4348	26.5765	29.2662	44.5333	66.4964	58.7578
28.1596	20.3033	40.7826	20.6555	27.0444	12.7646	33.2301	31.7522
31.264	19.1581	34.9145	17.3109	21.7325	8.2211	24.8771	22.5014
32.5556	13.6062	26.4348	23.9559	38.019	38.5676	23.1741	42.587
31.4208	29.2157	55.1453	23.9559	22.8518	40.3402	43.7298	42.2009
35.6995	13.6552	9.73733	22.5191	14.2191	60.4057	28.1881	29.6005
21.2361	20.6843	24.6862	43.6292	19.6207	43.7258	24.8142	42.1822
39.4302	20.3828	39.2053	16.7419	48.3979	12.7646	27.7097	32.4099
20.7996	8.30758	39.993	52.3738	34.122	56.2931	43.7298	31.3698
25.6336	20.6843	37.3087	18.3883	11.9483	38.0814	32.7894	23.0274
39.0916	31.3184	31.1858	19.214	35.6349	29.1095	34.4369	34.0181
25.5529	30.1961	45.1831	15.1574	27.0595	55.0817	40.4495	17.4817
28.2445	25.4954	44.8868	19.3871	30.7097	51.6855	34.2134	33.4291
39.4302	13.6552	38.3915	14.7127	25.9996	50.9855	26.1762	37.5688
28.2074	22.5007	29.2502	21.7859	24.4116	42.789	23.1741	47.3269
34.3873	38.9091	21.5973	16.0886	18.2295	43.9656	34.9997	38.1708
40.1221	19.3875	39.2053	39.0509	28.6278	99.2441	30.2177	21.4812
17.295	26.3018	38.4688	20.3333	15.2403	68.6157	33.4443	32.684
33.6381	16.6295	52.6232	25.1609	11.2946	63.1925	29.0844	28.9852
29.6327	28.0798	38.4688	20.9682	26.7421	22.1015	23.4481	33.0376
33.7216	29.4413	46.2492	26.6999	14.9346	36.8069	36.0914	33.2956
31.6194	21.4189	36.3361	28.5493	13.1708	38.7961	51.9883	43.296
30.6979	20.3033	31.8114	23.6855	31.7983	29.6257	28.1881	43.5061
29.3768	57.2627	32.7933	23.6572	17.2861	36.0444	28.827	35.3901
29.0334	40.2702	33.2518	26.2517	18.2295	41.4904	24.8649	37.8644
25.7319	21.3597	15.5215	21.3604	25.8866	34.7149	24.8649	17.2269
17.8875	31.0783	28.6717	27.5891	19.6207	43.3034	31.9704	30.204
36.3136	19.3875	44.8868	31.6633	27.1565	32.6501	124.897	32.4099
35.5415	18.4623	47.4435	20.5425	30.1976	46.3919	28.0373	33.7749
23.5411	23.271	16.5996	14.0042	28.7099	83.7792	35.2267	39.5349
31.7357	25.4954	56.8755	35.8639	22.2542	34.8743	32.19	32.9763
22.8867	28.87	63.9517	30.4996	38.9824	41.2645	24.6811	39.3513
34.1569	29.5389	67.1684	22.3219	33.8188	19.7319	18.6562	42.5716
32.5556	30.1961	16.5996	23.0887	30.5914	88.5576	29.0844	31.2566
26.5646	16.6295	82.198	11.5292	17.1658	41.6751	162.591	33.4291
28.0347	23.7882	45.0486	27.5265	38.019	55.2871	34.2134	27.2148
39.0916	24.4122	48.2266	22.0697	29.3036	19.7319	22.7299	22.1147
23.5411	26.3321	33.339	22.6745	24.5254	32.6501	164.794	35.3946
28.6017	26.771	28.6717	12.9595	32.3498	38.2794	36.9887	19.4195
32.7336	19.2467	75.9144	12.9606	30.4755	41.8215	85.8613	20.1832
31.5546	30.6895	43.0673	23.3701	22.2542	36.3392	71.6357	47.6056
31.4346	16.2473	47.5941	31.0059	15.3007	30.5587	35.4119	33.6916
22.2033	26.623	50.396	24.6322	29.3152	46.3705	33.9099	47.6056
27.9119	24.957	40.2027	18.6409	25.6709	68.6157	22.7299	24.6866
27.5685	18.7109	50.7498	28.7631	38.3629	31.1903	47.9423	38.9835
29.0364	25.1601	84.2766	34.3001	22.638	41.2645	33.7313	30.204
28.4983	37.4596	53.0775	28.4676	17.4734	42.7497	39.1974	47.3269
22.3339	24.325	86.7626	27.6277	41.165	30.7831	31.651	34.9054
25.4058	99.912	38.204	25.0039	13.6783	45.5175	33.0782	27.4235
26.7182	29.5389	30.4133	25.7018	23.9095	40.014	31.9704	38.4652
30.6979	22.1727	75.7583	25.3137	28.6278	29.2259	40.5696	33.7282
29.6327	16.4583	35.8259	26.8487	47.3985	33.6144	42.4767	33.7282
