# Supplementary material for: Targeting RNA:protein interactions with an integrative approach leads to the identification of potent YBX1 inhibitors
Source: eLife journal article supplement (doi:10.7554/elife.80387), 2023-01-18
Supplement: supp [file elife-80387-supp-v1.zip › elife_poa_e80387_Figure_8_source_data_3.xlsx]

## Sheet: Feuil1
640207	611053	395798	454508	319001	242506	559644	508385	554222	326299	281462	408006	286257	385695		Cell Number per well
606745	599444	453147	431970	220865	325226	588456	546053	567079	382418	300542	338437	265924	332536
632760	585731	434165	455987	356011	325937	547988	539951	559919	559848	269743	276042	388036	260259
624938	607286	220739	416008	306410	360008	603970	583732	590997	469212	332711	385425	390684	155867
618357	624822	427923	356221	333116	348154	595516	592693	550717	481852	332529	262951	364042	135223
658237	609367	344868	405677	350329	392198	605409	532387	531770	447697	363034	206371	421655	174066
645837	636434	383860	409885	229621	418524	597072	588694	544831	502804	329406	276319	334455	154233
623528	633147	391761	462172	367558	393214	585146	592613	519717	377045	373294	164676	352284	172343
DMS0	DMSO	Nira, 2.5 µM	Nira, 2.5µM	Nira, 5µM	Nira, 5µM	Ola, 2.5µM	Ola, 2.5µM	Ola, 5µM	Ola, 5µM	Tala, 1µM	Tala, 1µM	Tala, 2µM	Tala, 2µM	48 h
	Si YB-1
	Si Neg
