# Supplementary figures and images for: Targeting RNA:protein interactions with an integrative approach leads to the identification of potent YBX1 inhibitors
Source: eLife journal article supplement (doi:10.7554/elife.80387), 2023-01-18

**a**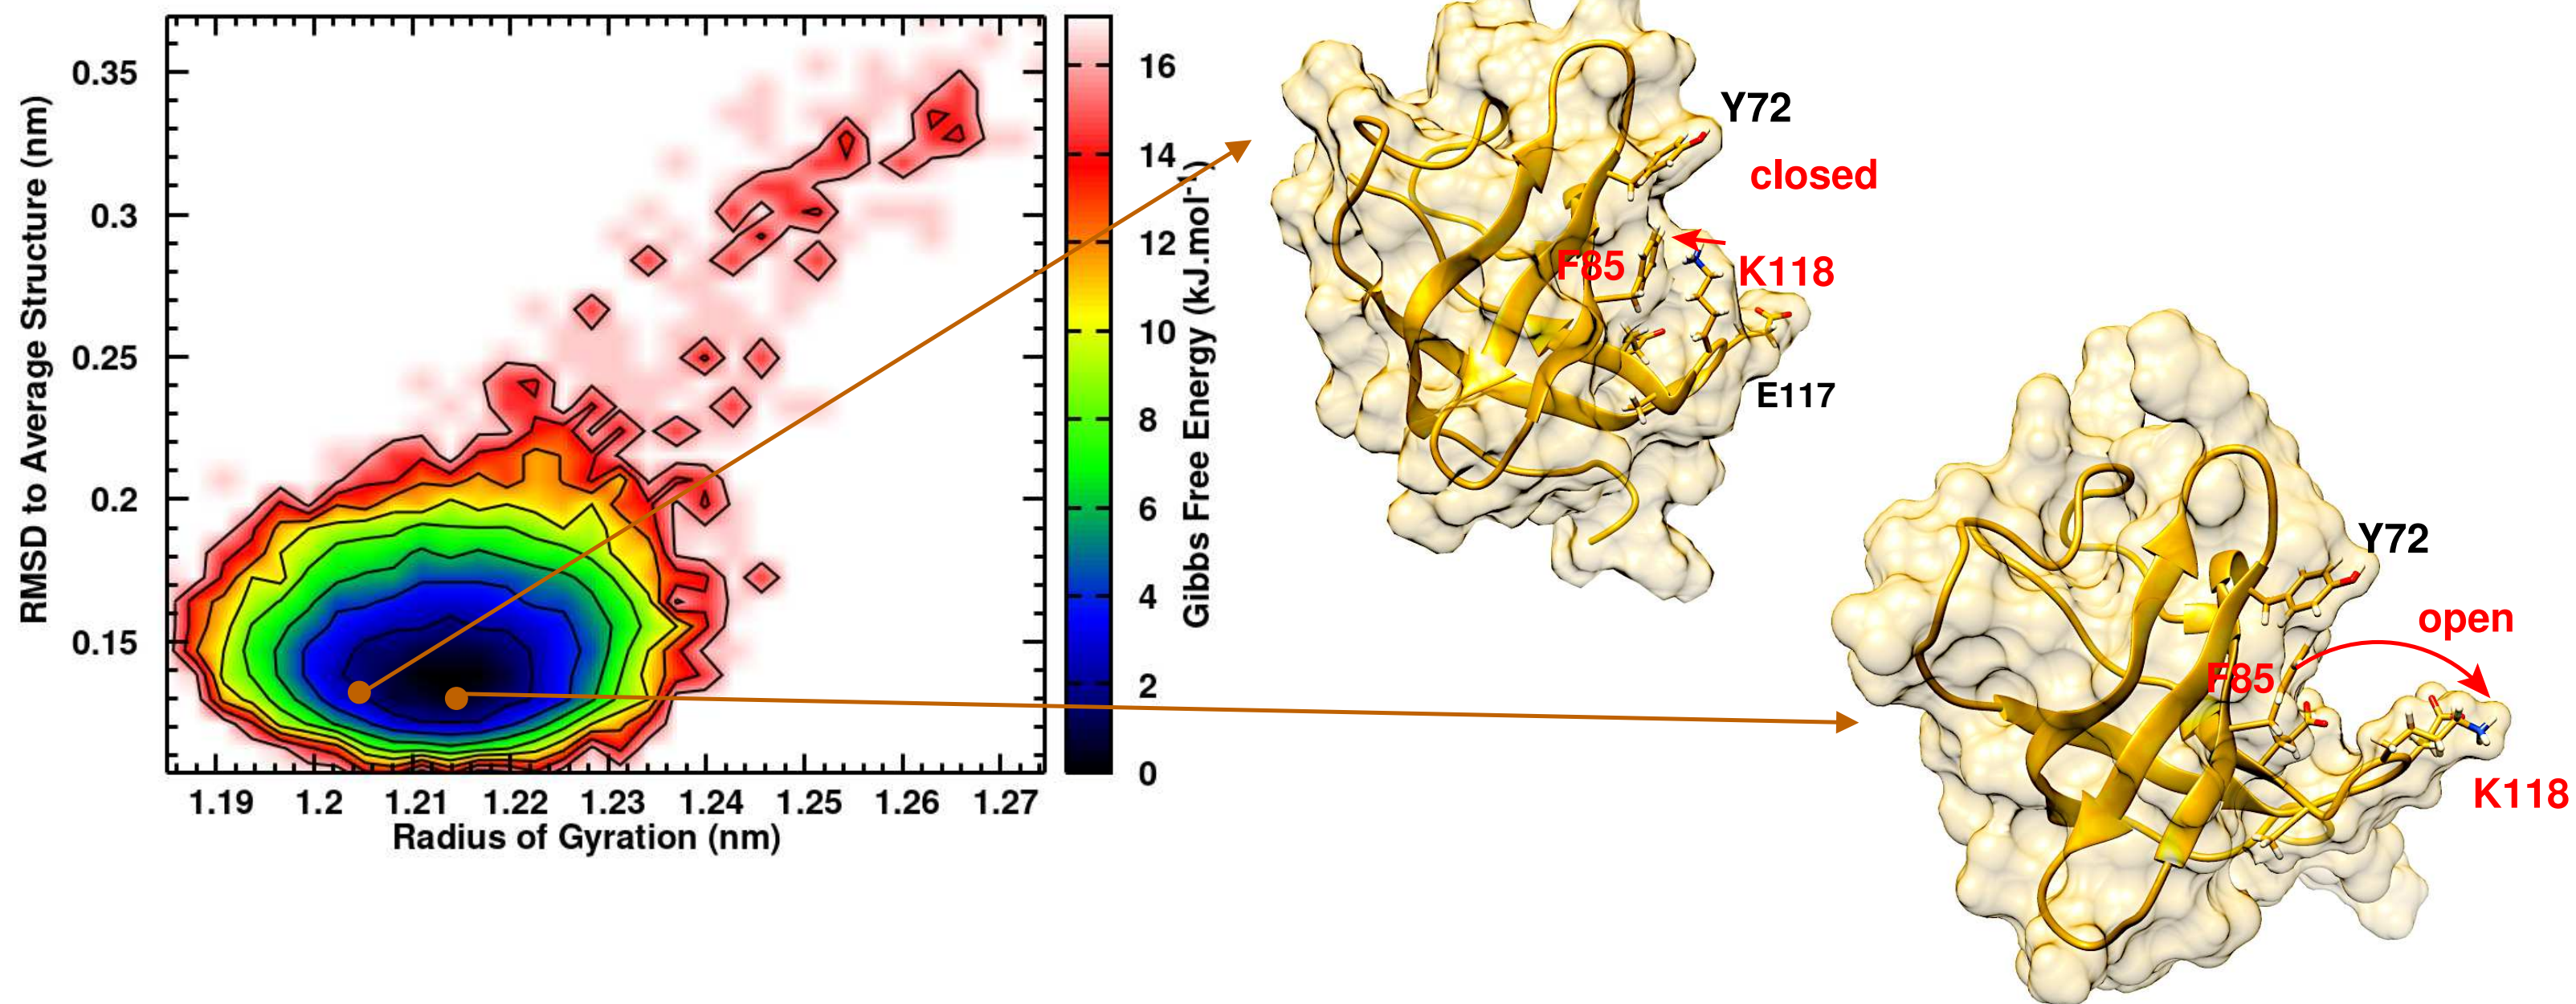**b**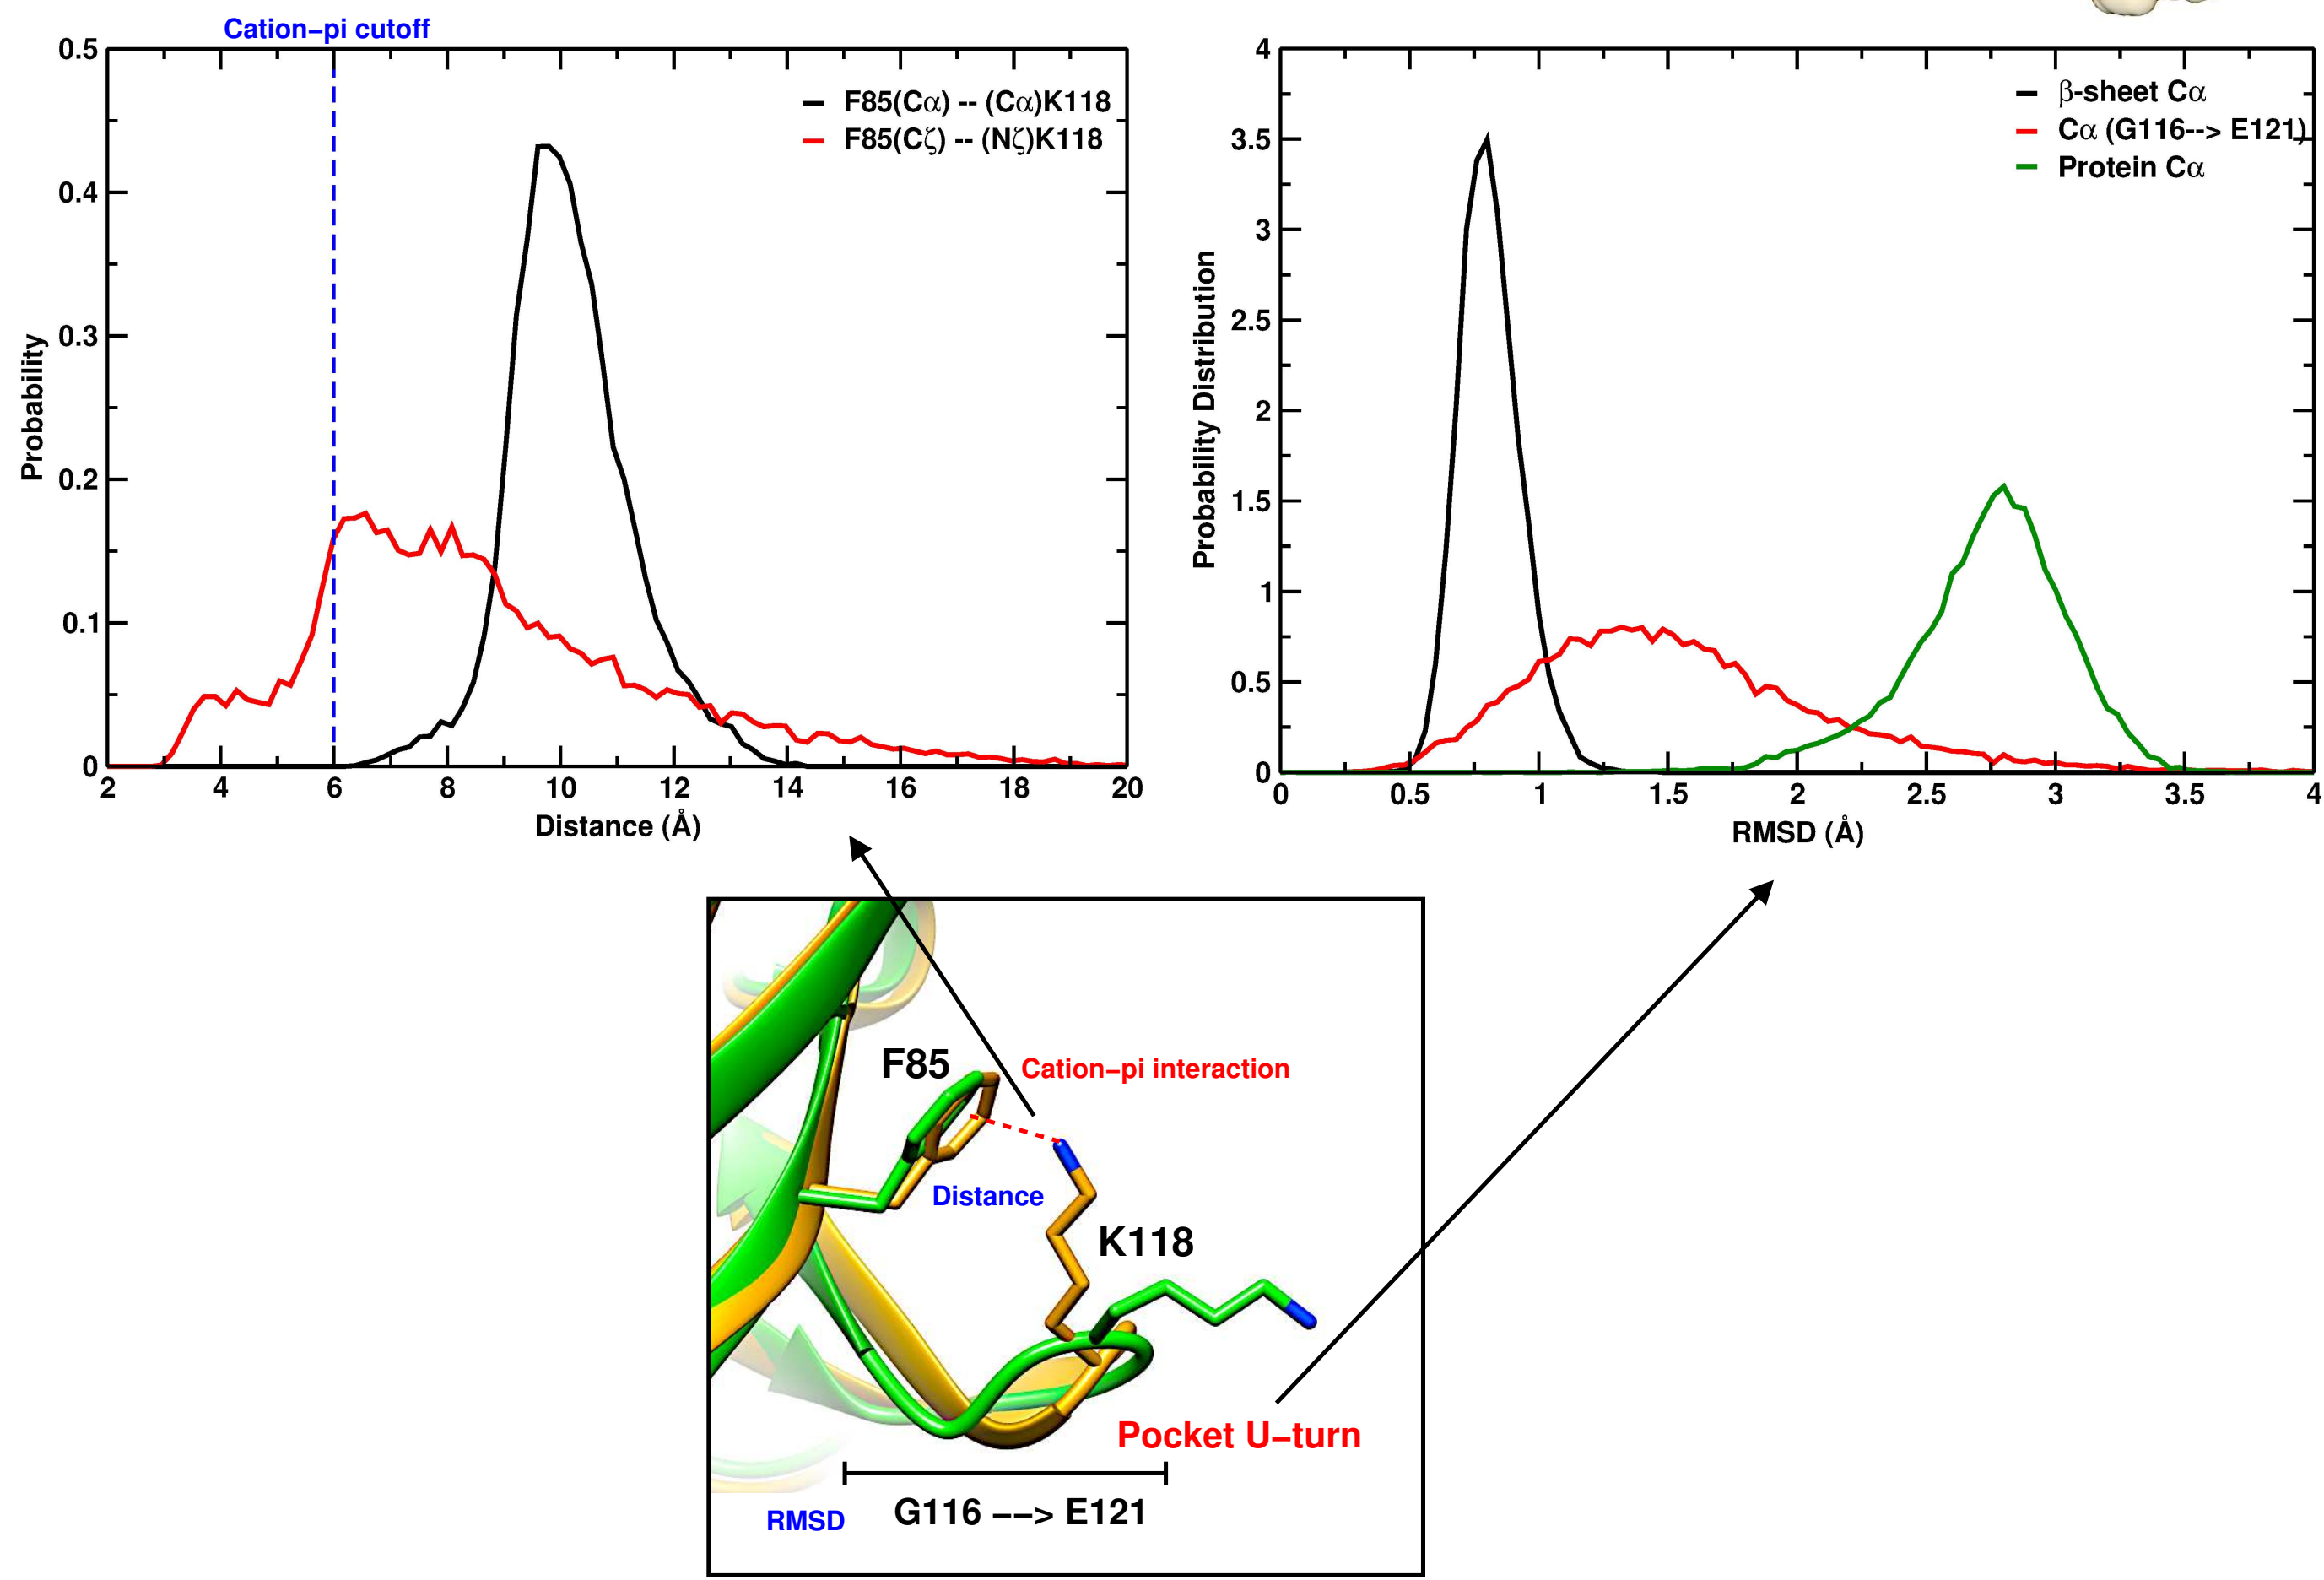

Supplement: supp [file elife-80387-supp-v1.zip]

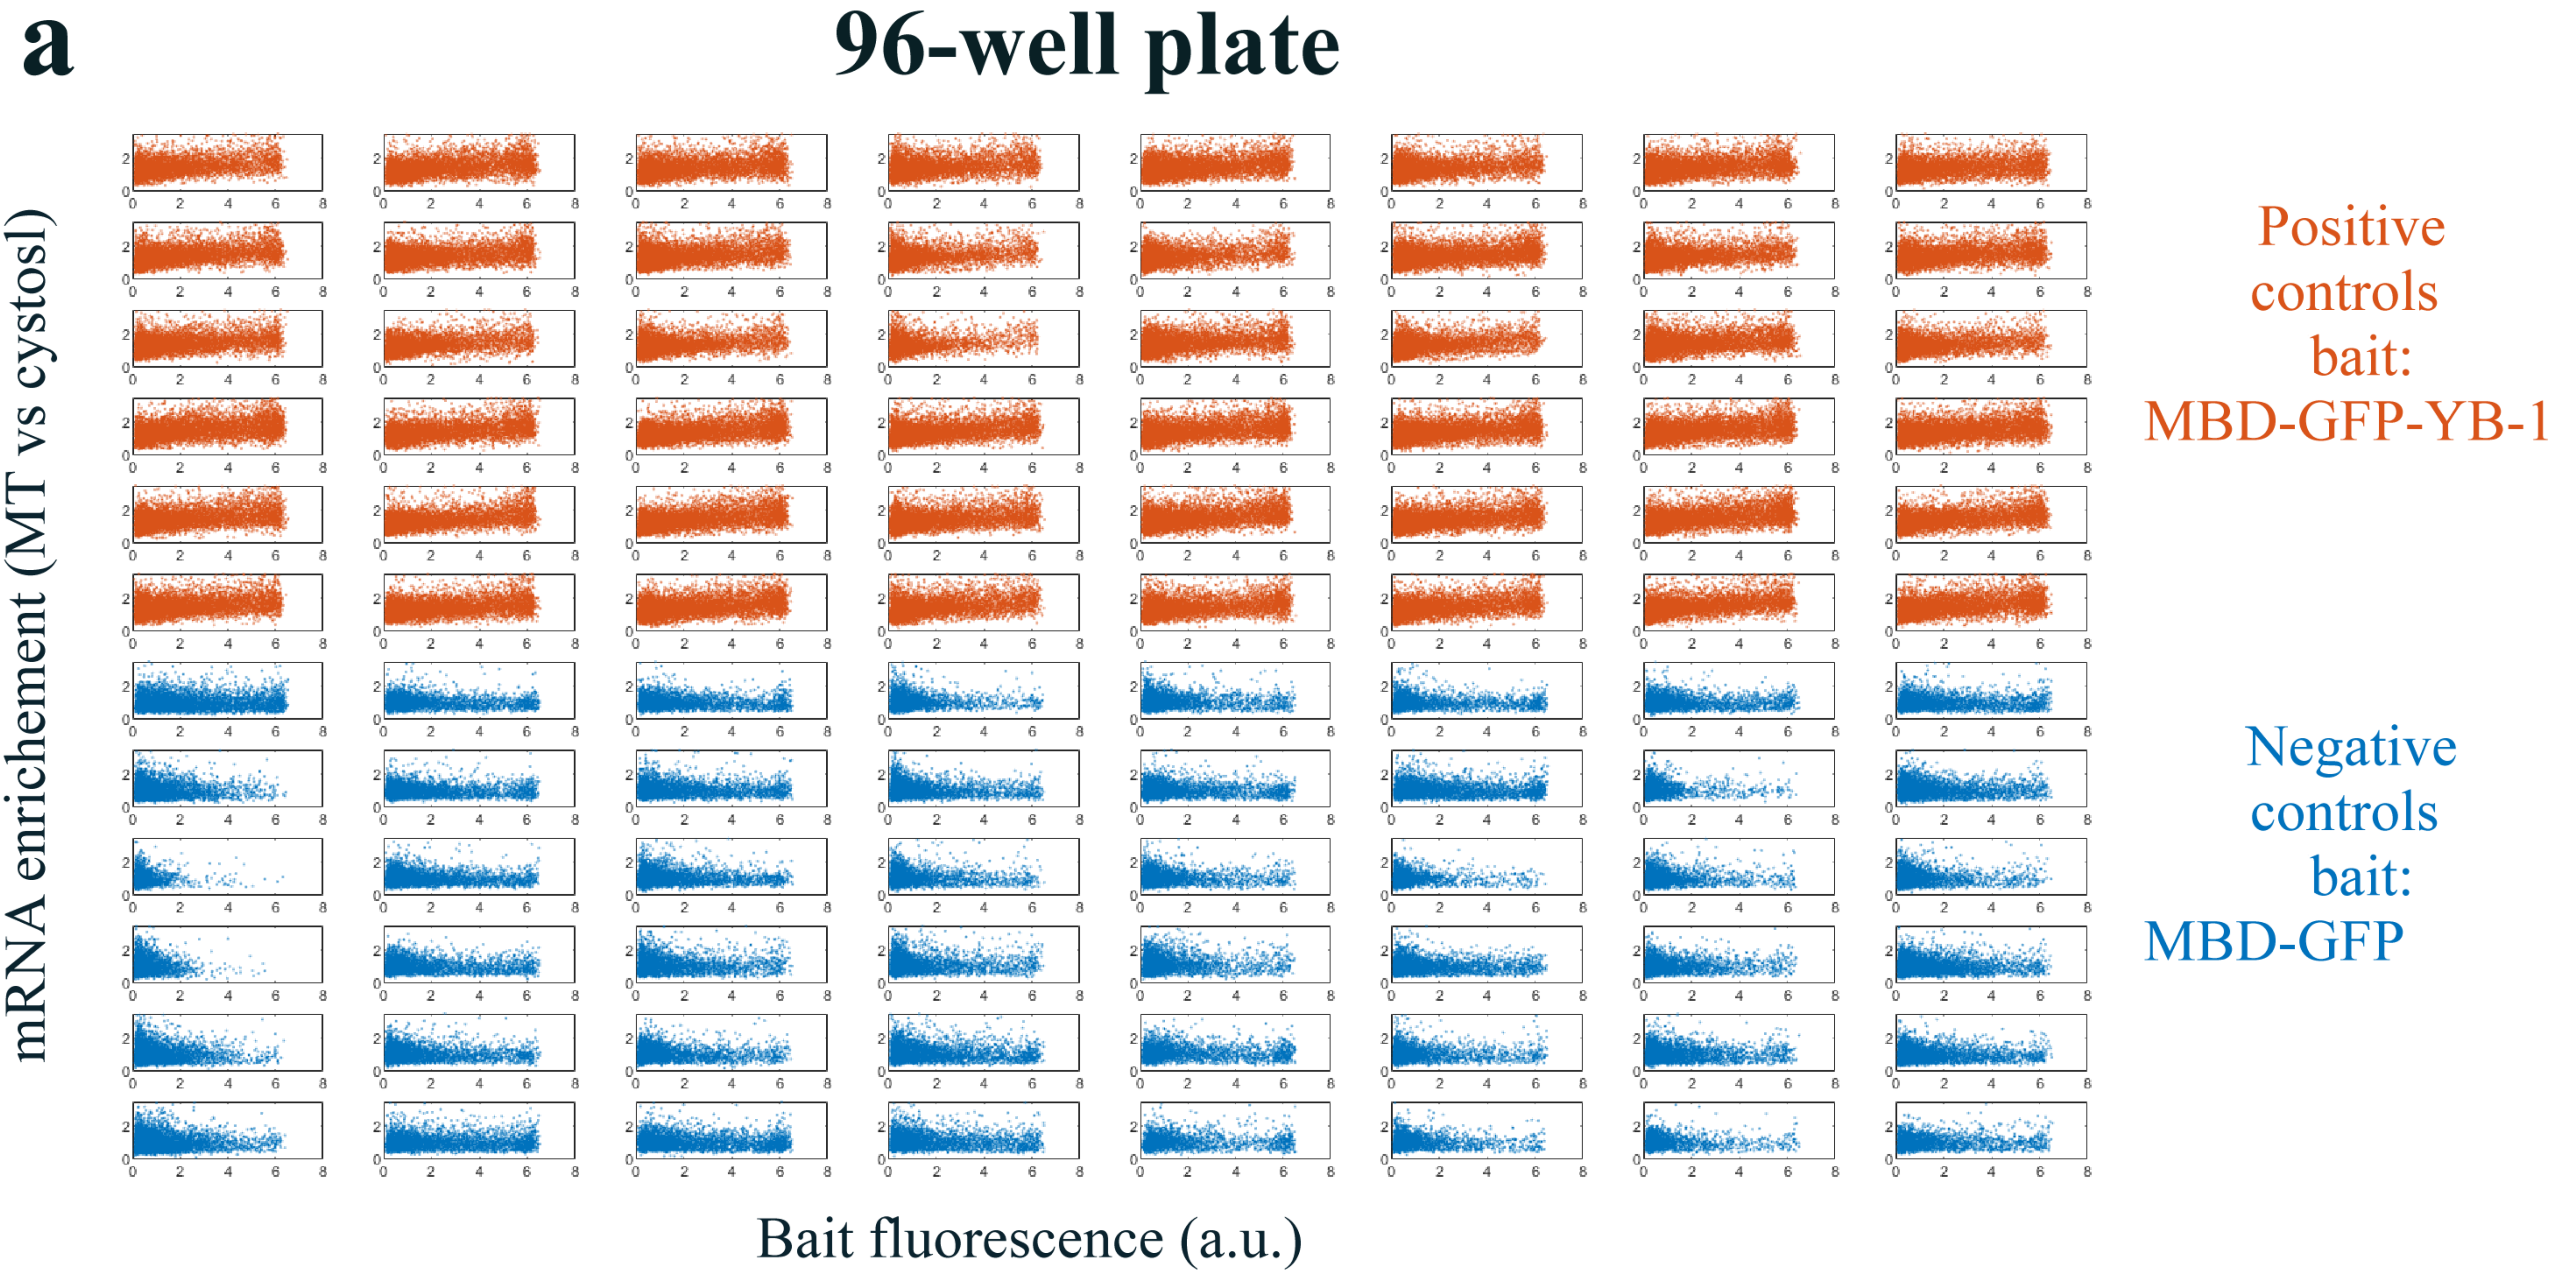

**b**

| slope values |      |       |       |      |      |       |      |
|--------------|------|-------|-------|------|------|-------|------|
| 1.21         | 1.12 | 0.93  | 1.09  | 0.95 | 1.04 | 0.94  | 0.91 |
| 1.03         | 1.04 | 1.04  | 1.02  | 0.99 | 0.90 | 0.91  | 1.05 |
| 0.98         | 1.12 | 0.90  | 1.02  | 0.85 | 0.97 | 0.91  | 0.88 |
| 0.98         | 1.11 | 1.08  | 1.19  | 1.04 | 0.94 | 1.07  | 0.92 |
| 0.95         | 1.11 | 1.11  | 0.93  | 1.07 | 1.03 | 0.94  | 1.05 |
| 0.85         | 0.89 | 1.00  | 0.94  | 0.84 | 0.99 | 1.12  | 1.02 |
| 0.02         | 0.08 | 0.14  | 0.07  | 0.08 | 0.03 | 0.13  | 0.04 |
| 0.24         | 0.16 | 0.07  | -0.01 | 0.04 | 0.05 | -0.02 | 0.01 |
| 0.04         | 0.06 | -0.04 | 0.04  | 0.12 | 0.06 | 0.14  | 0.05 |
| -0.02        | 0.21 | 0.15  | 0.08  | 0.15 | 0.09 | 0.29  | 0.14 |
| 0.07         | 0.04 | 0.03  | 0.03  | 0.13 | 0.09 | 0.18  | 0.01 |
| 0.10         | 0.12 | 0.00  | 0.07  | 0.03 | 0.07 | 0.02  | 0.17 |

Supplement: supp [file elife-80387-supp-v1.zip]

a

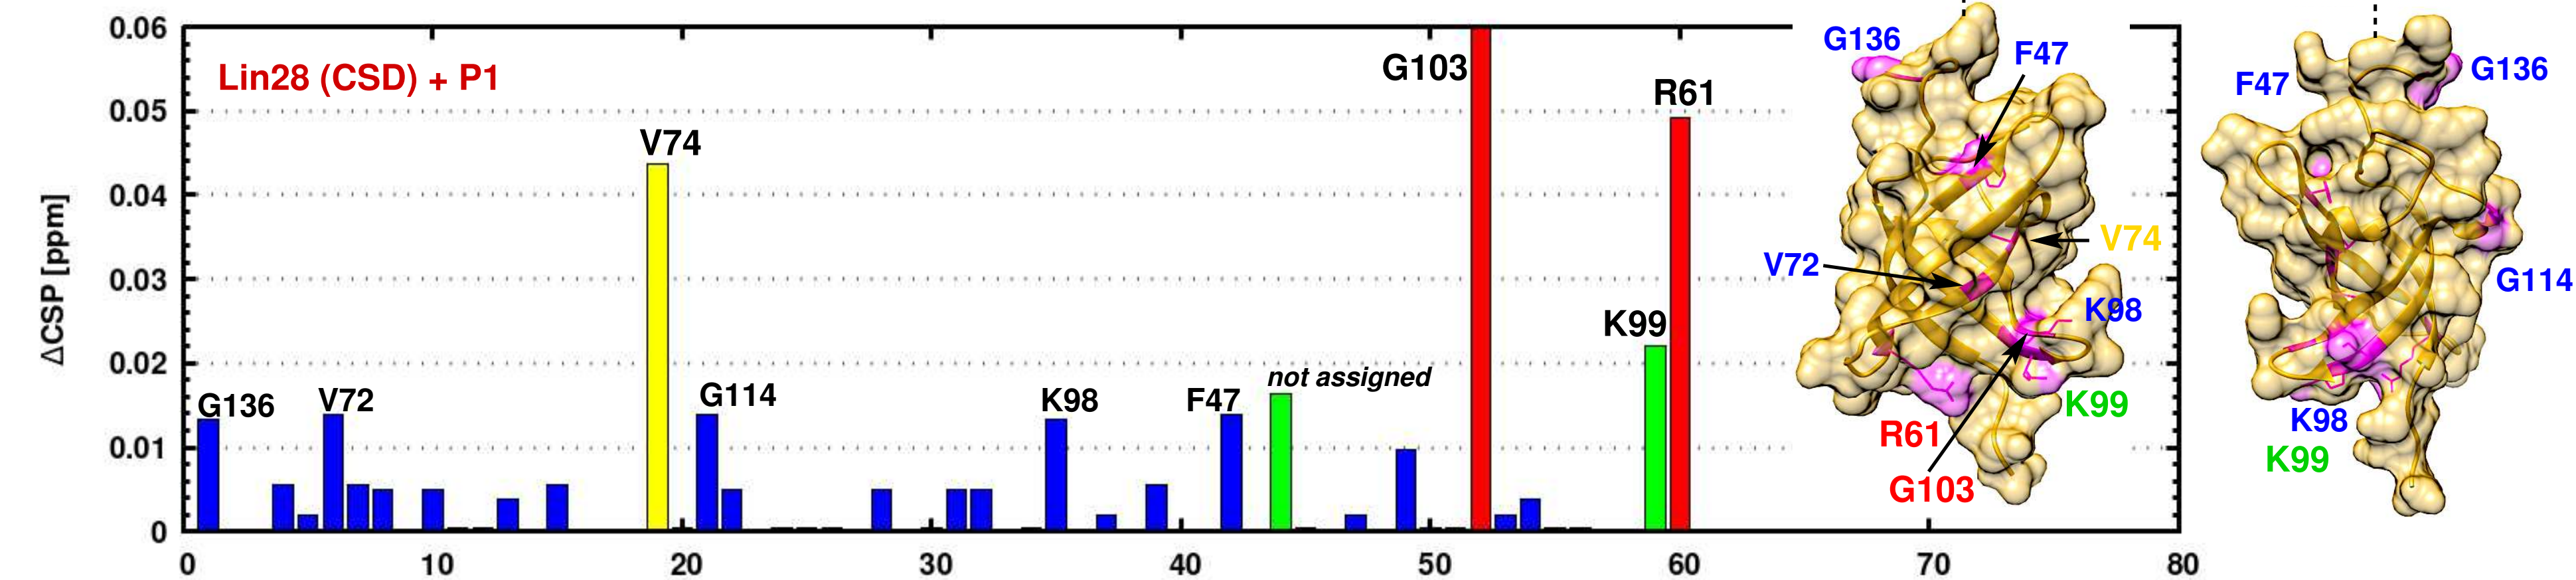

b

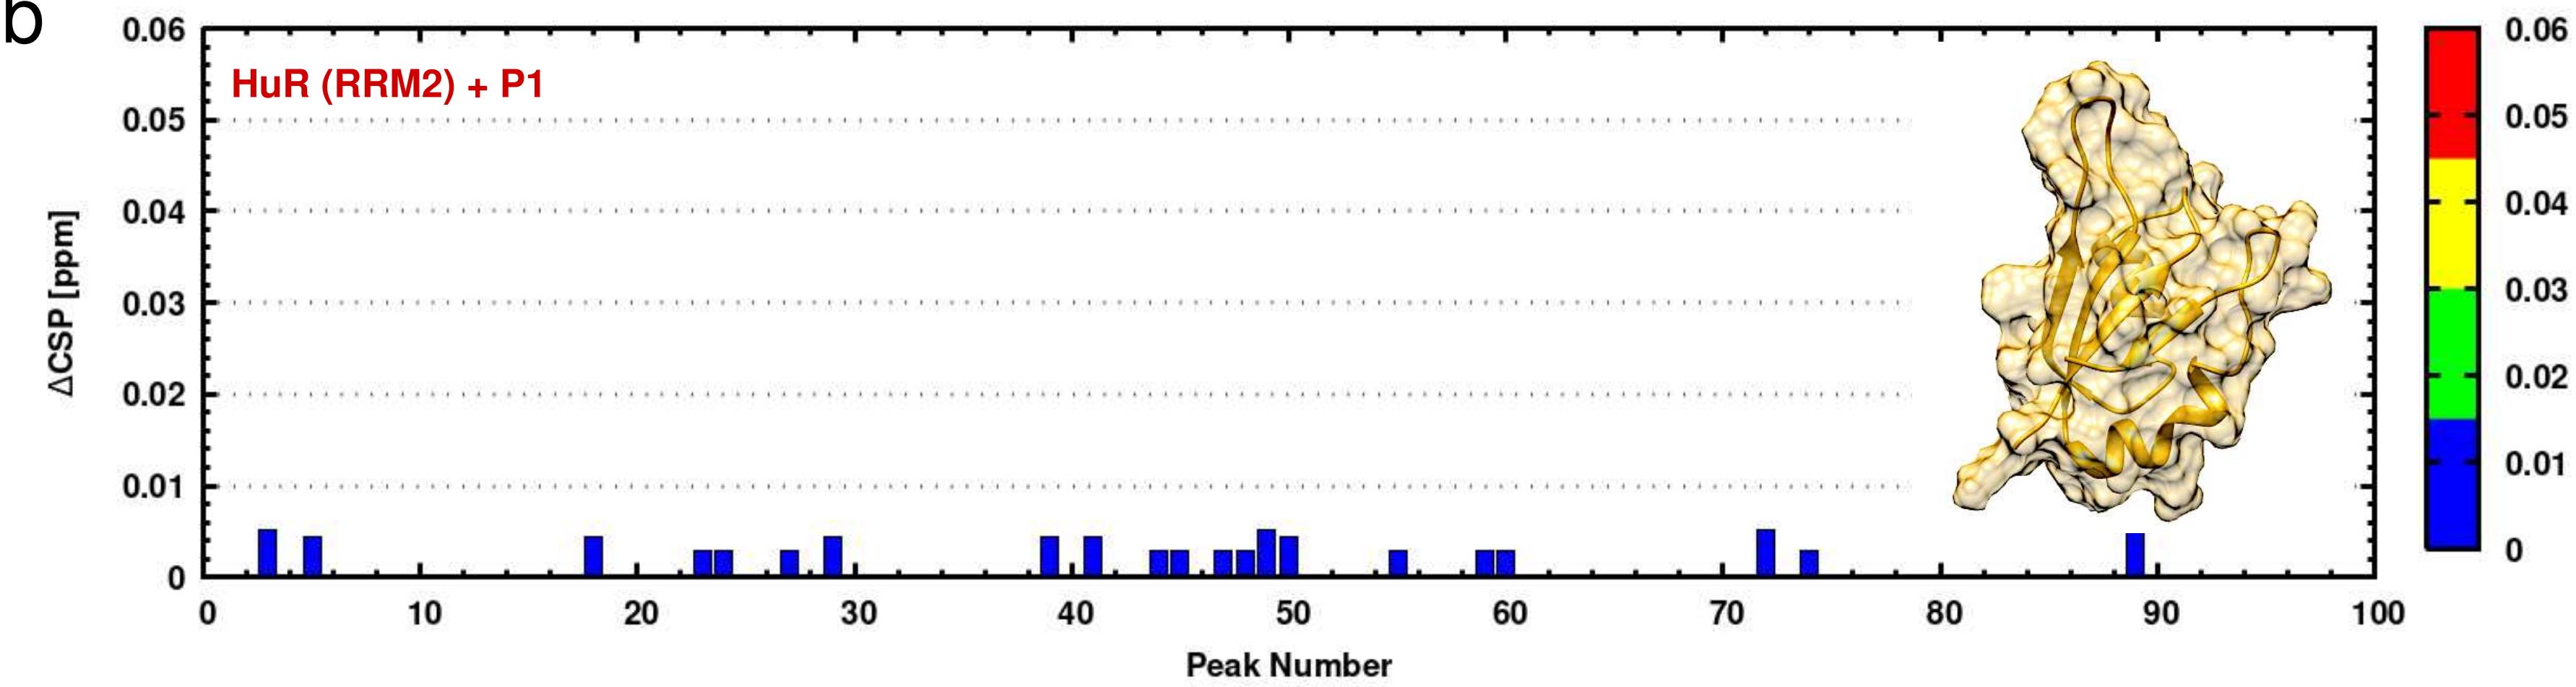

Supplement: supp [file elife-80387-supp-v1.zip]

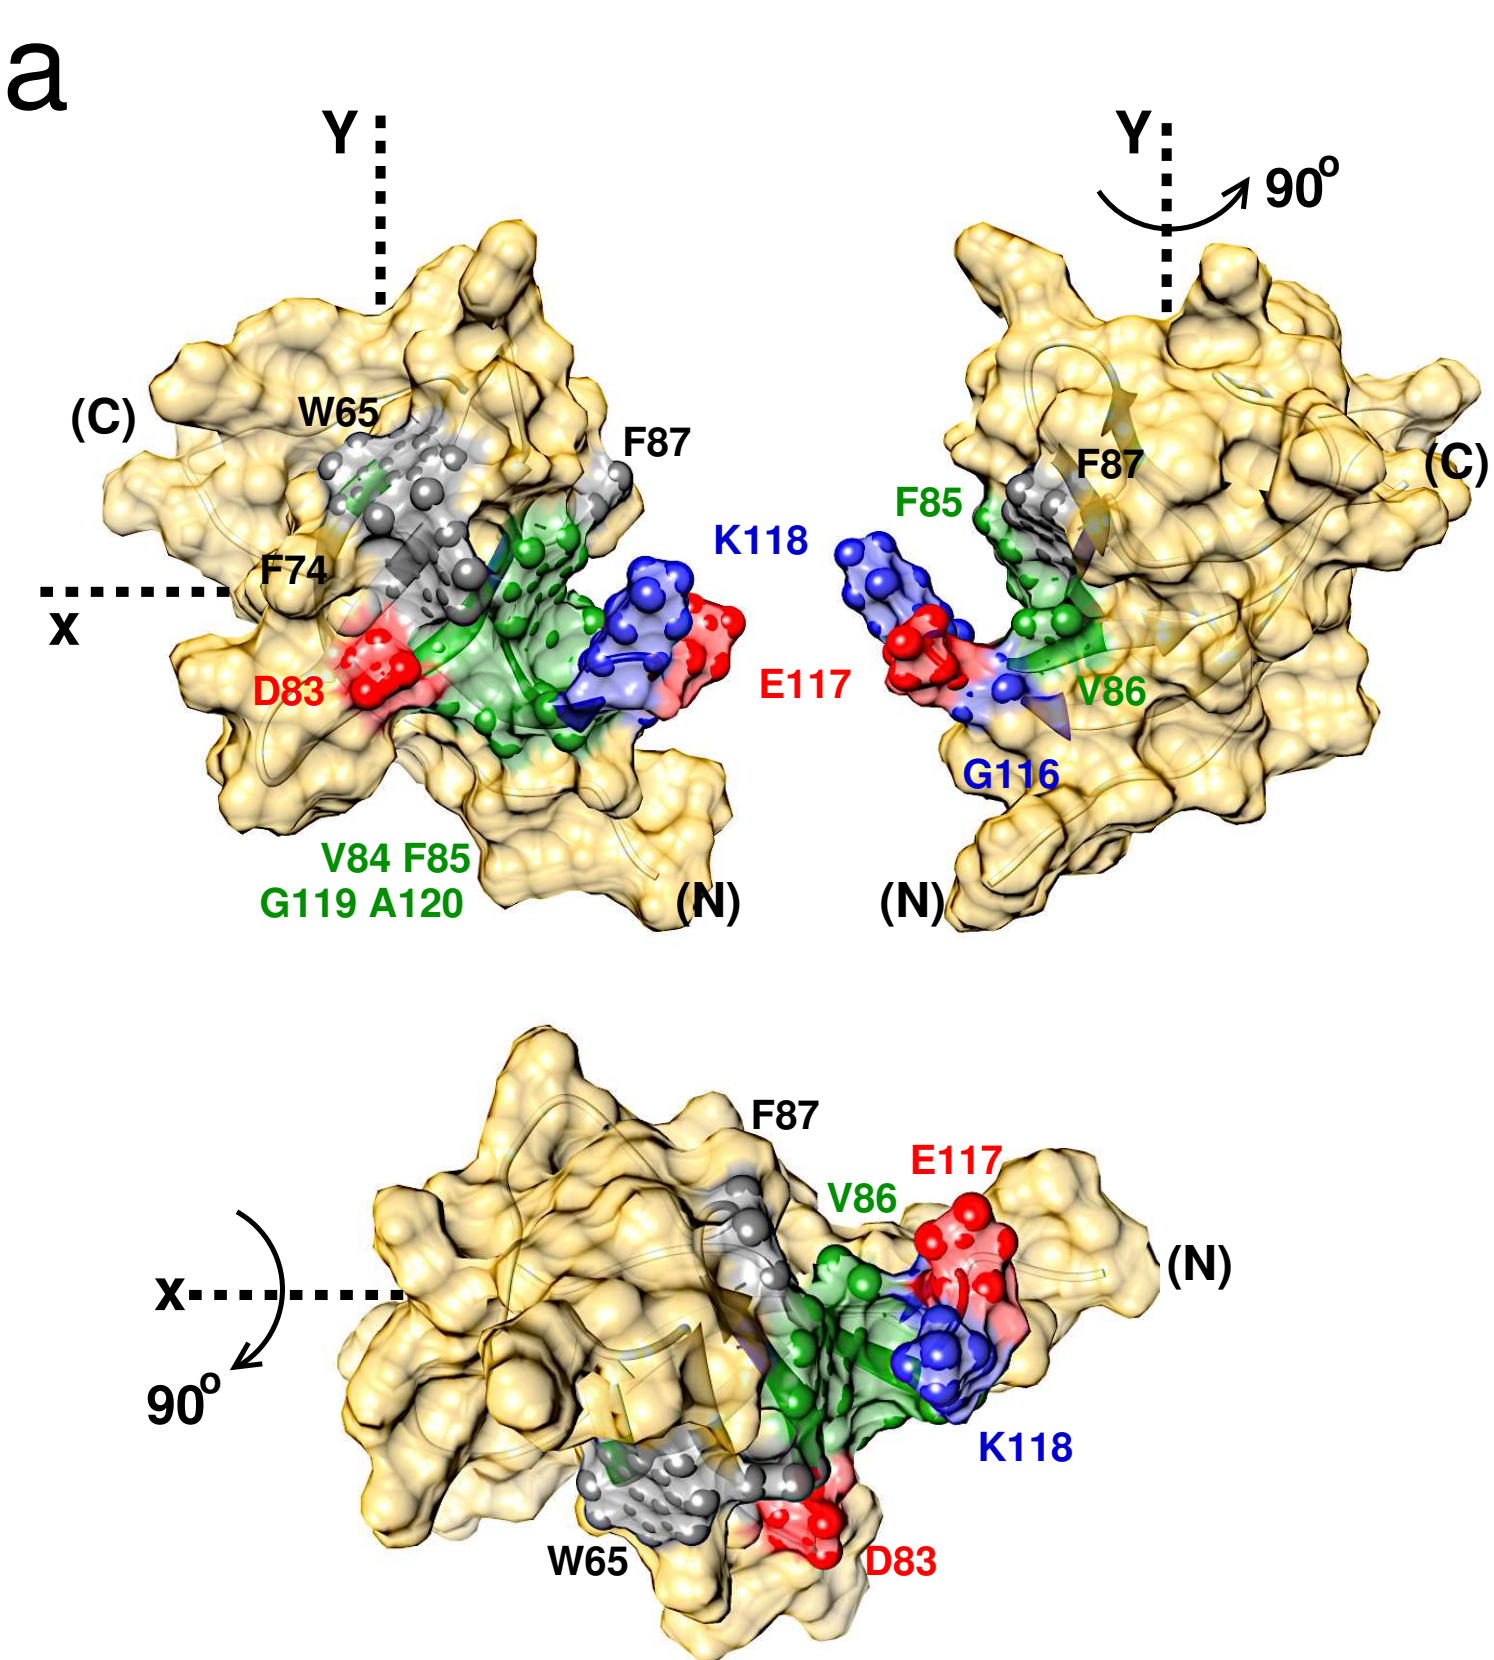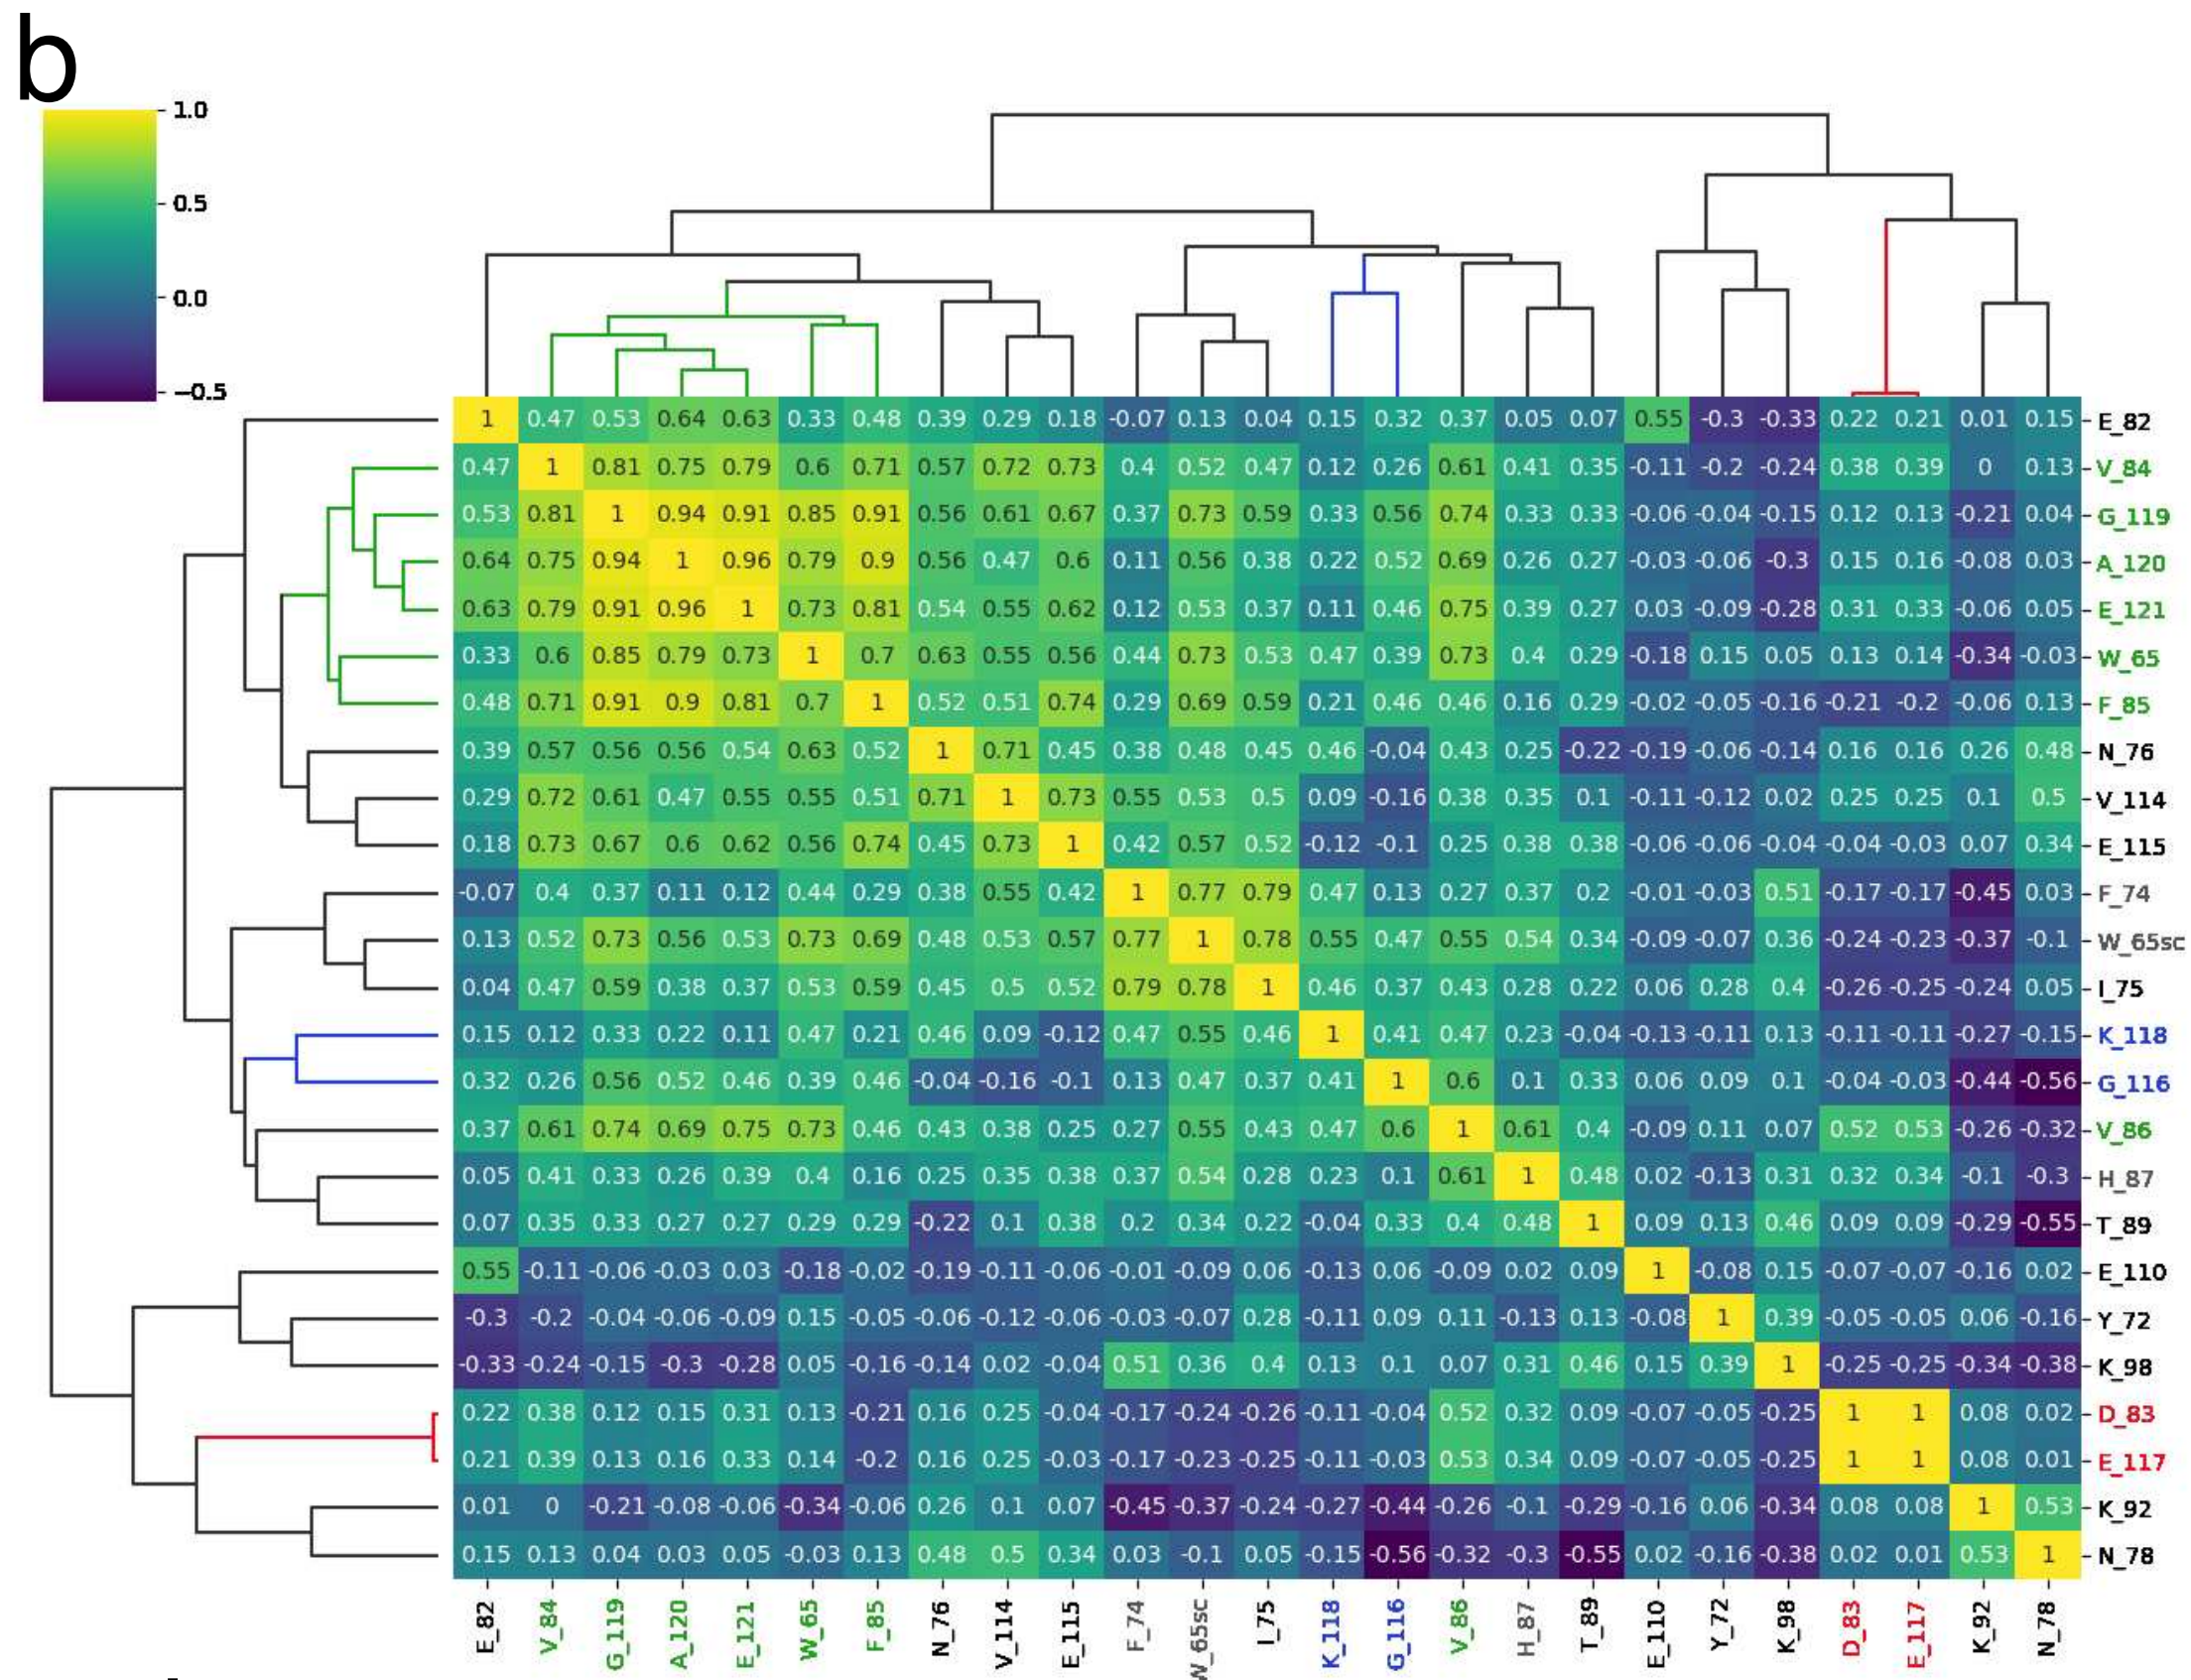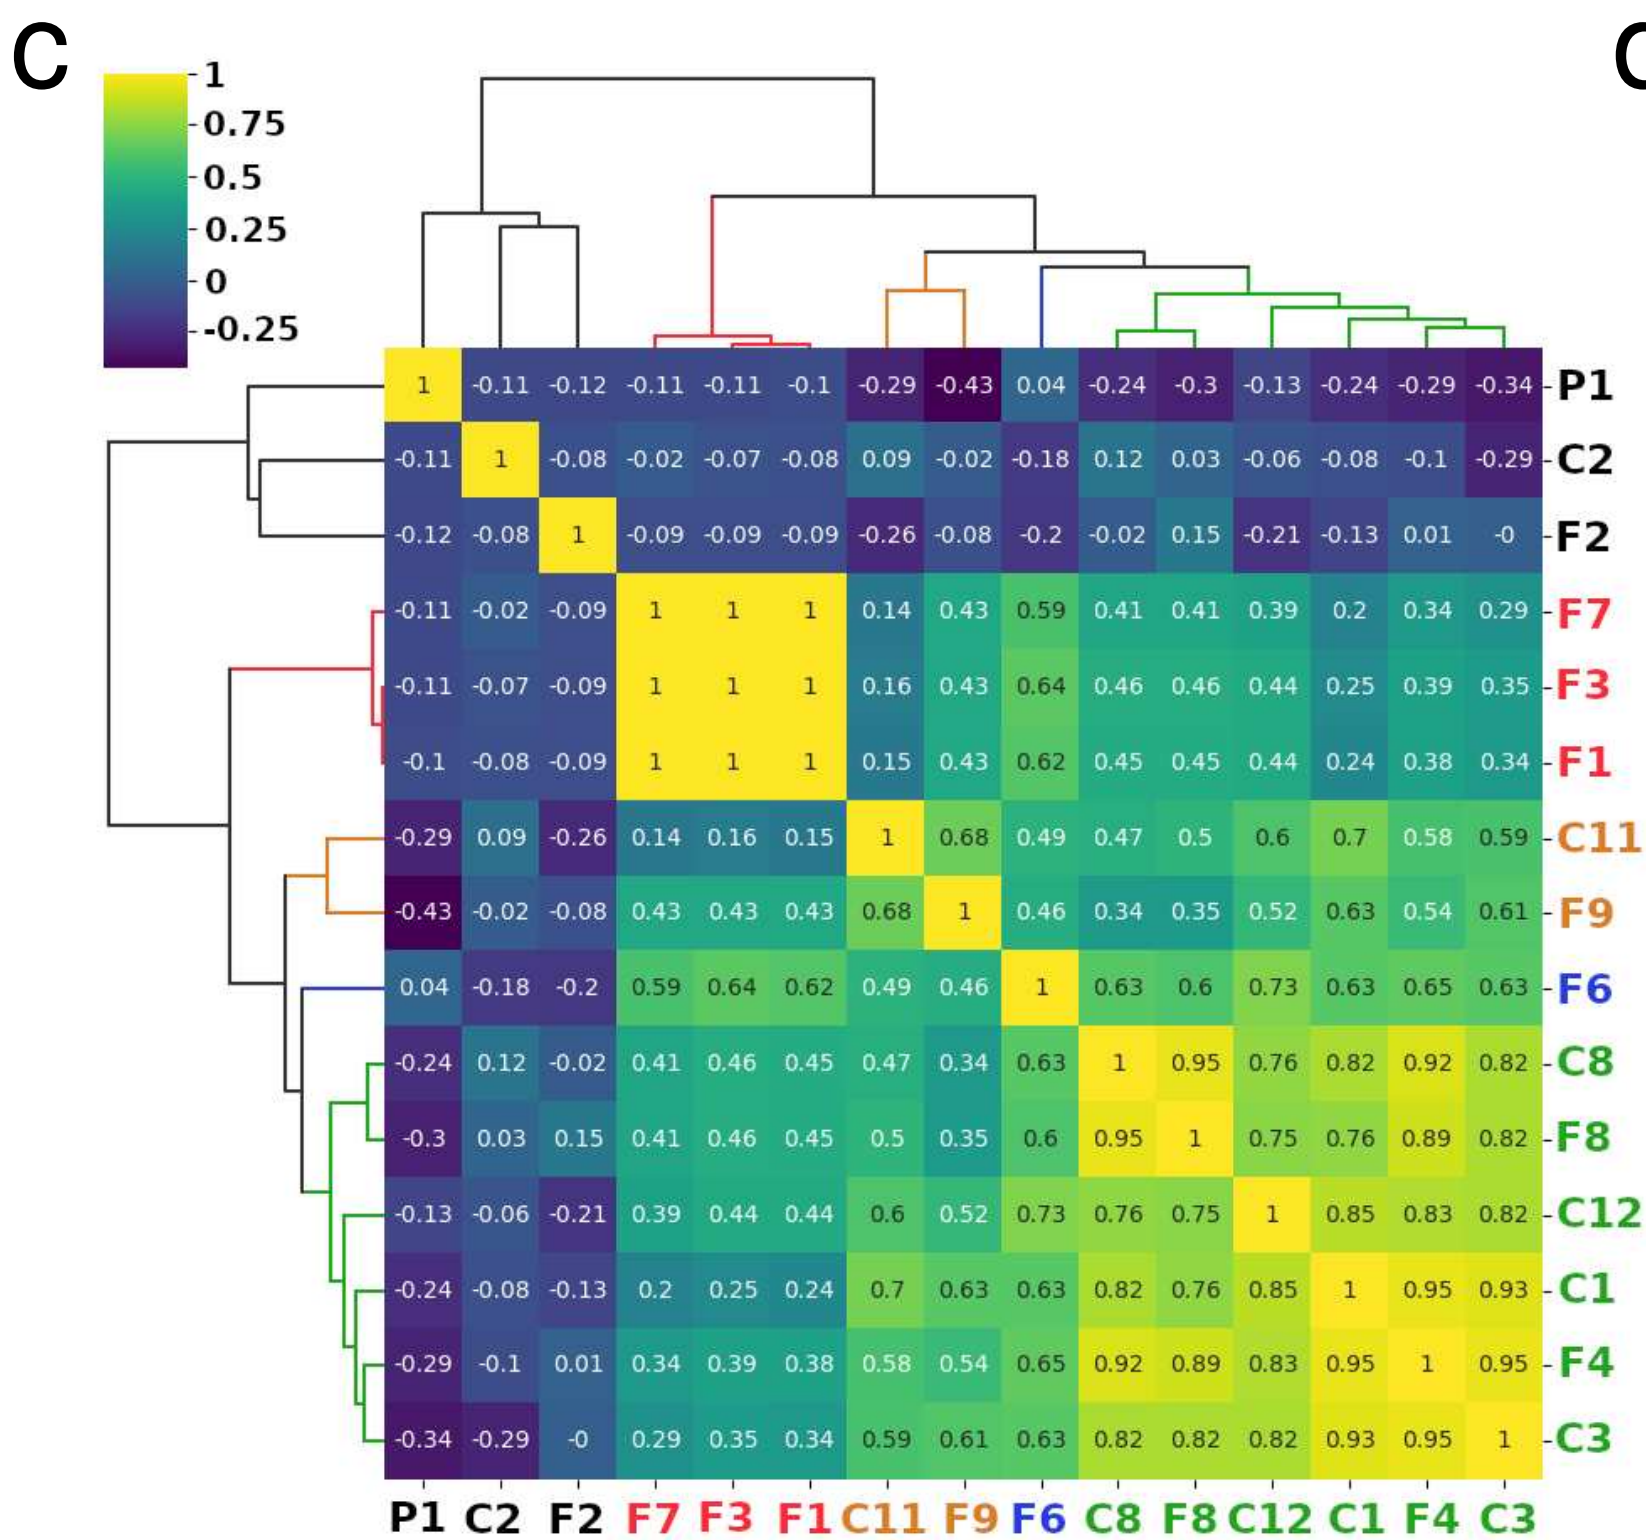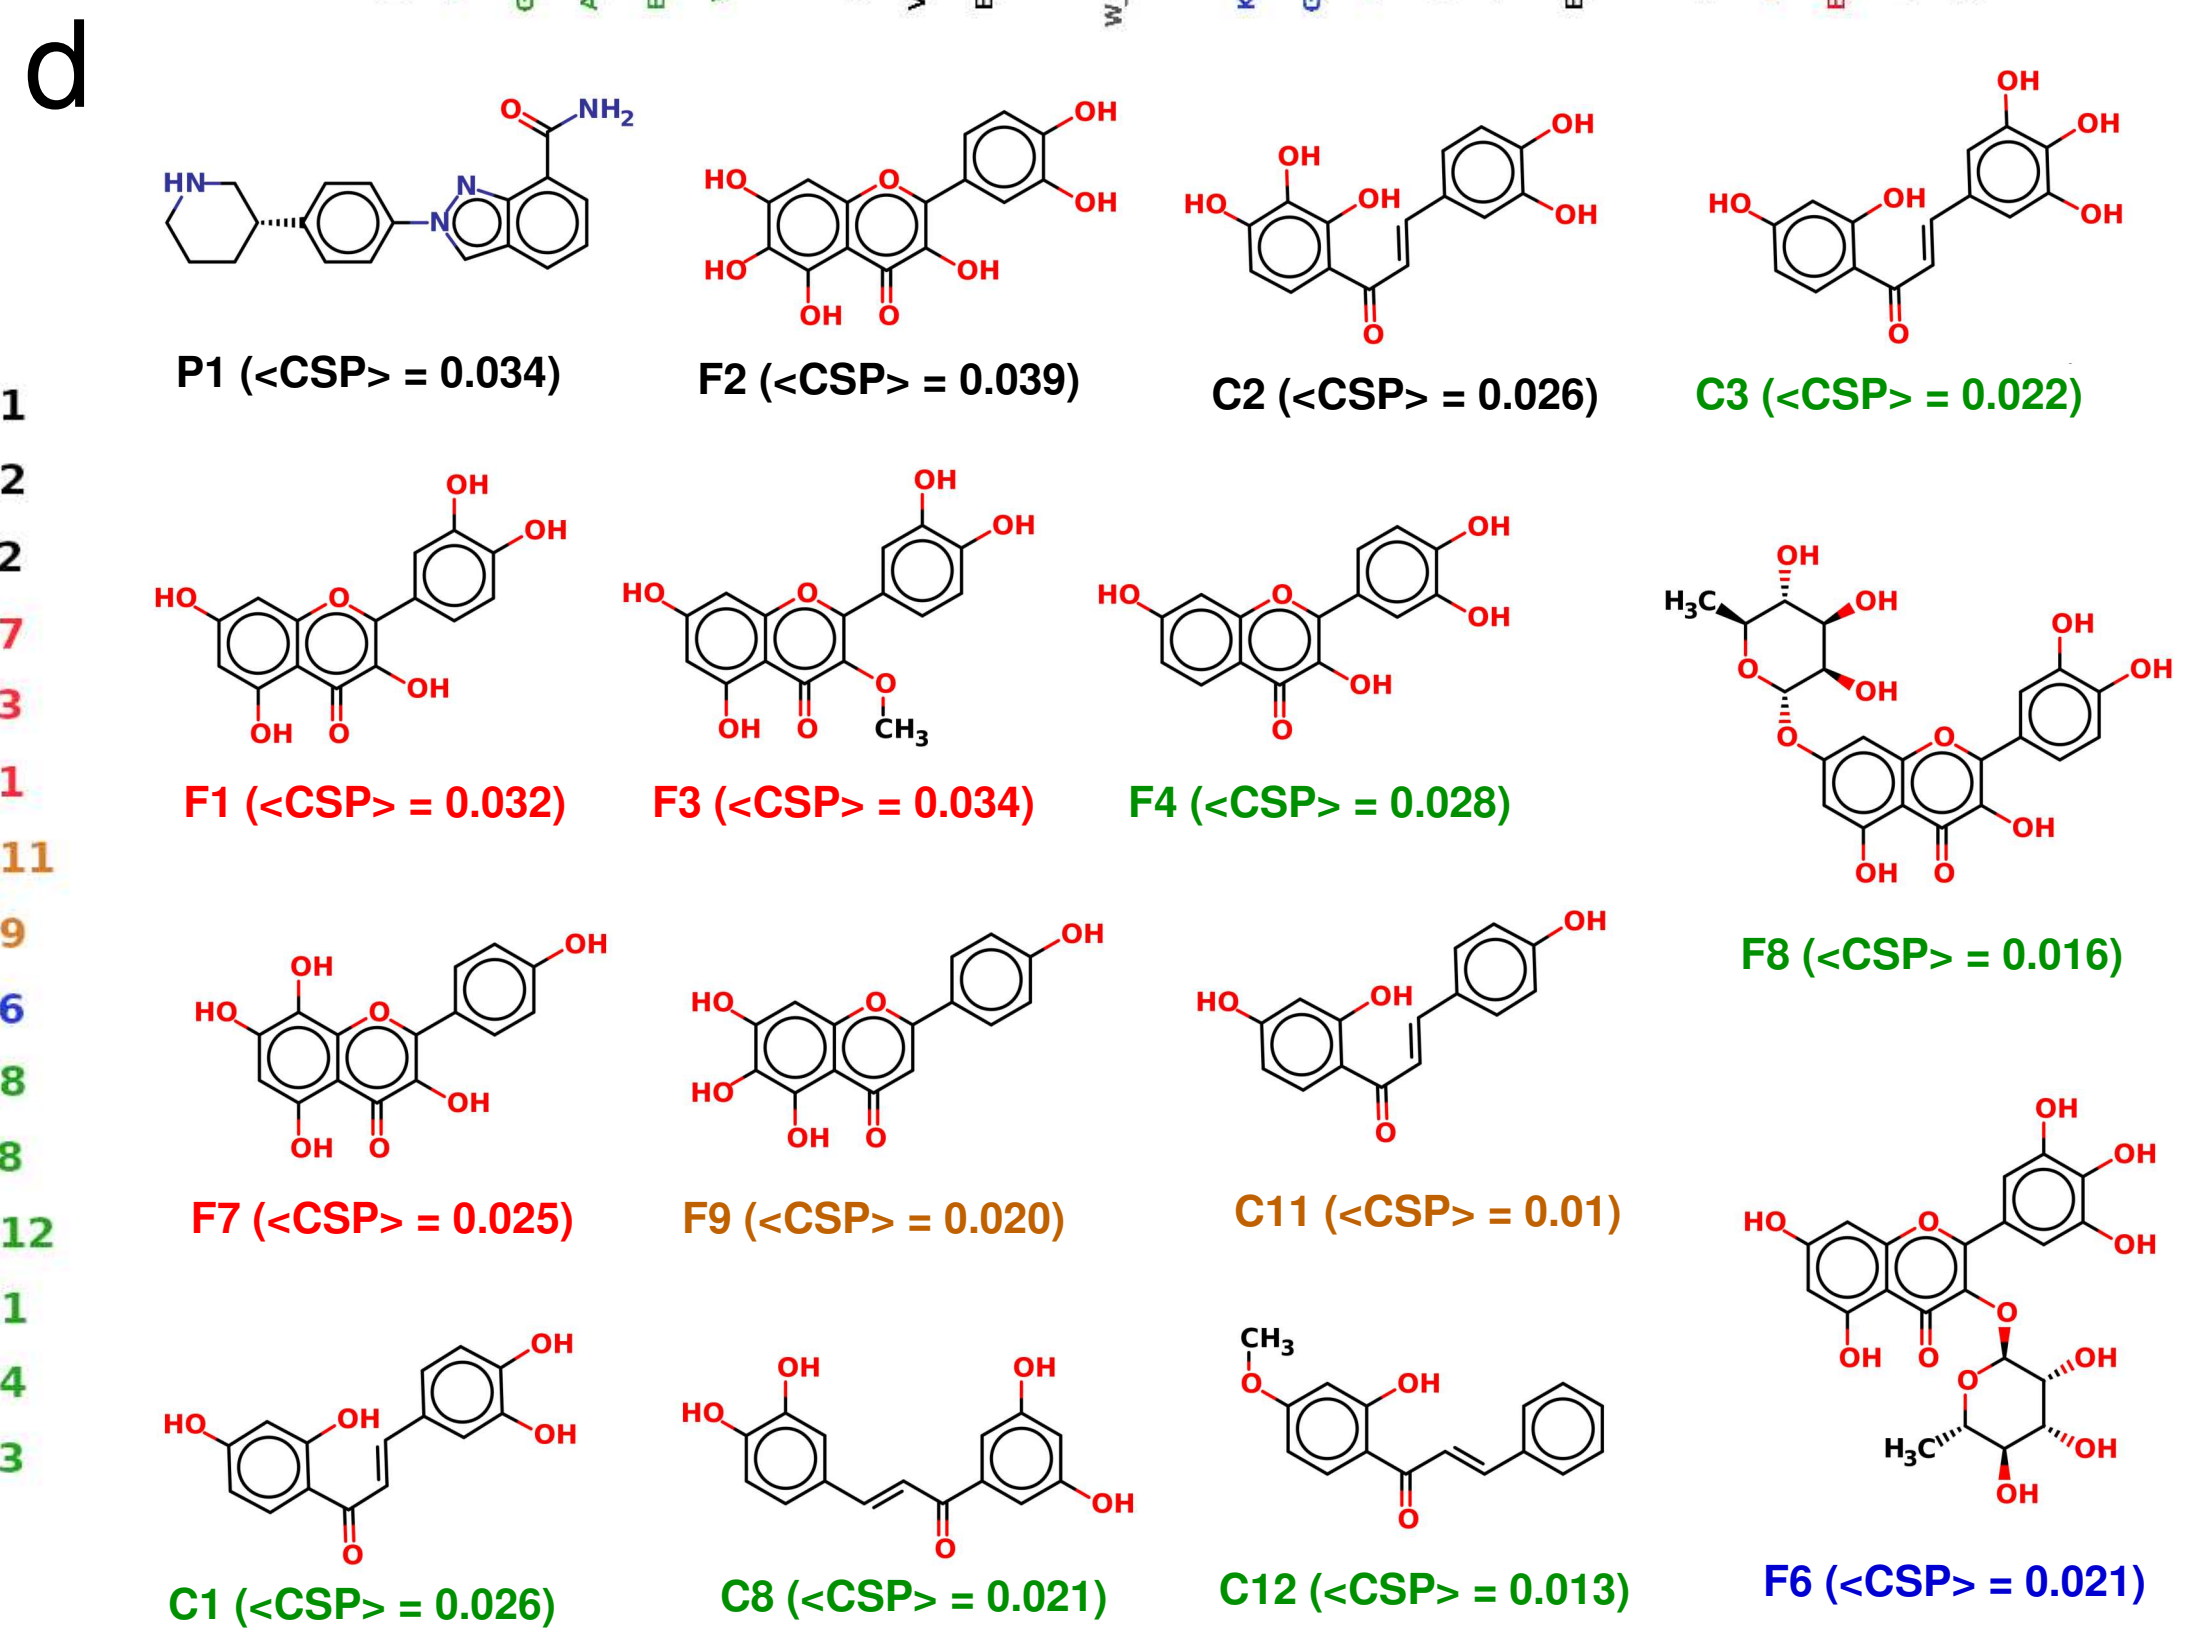

Supplement: supp [file elife-80387-supp-v1.zip]

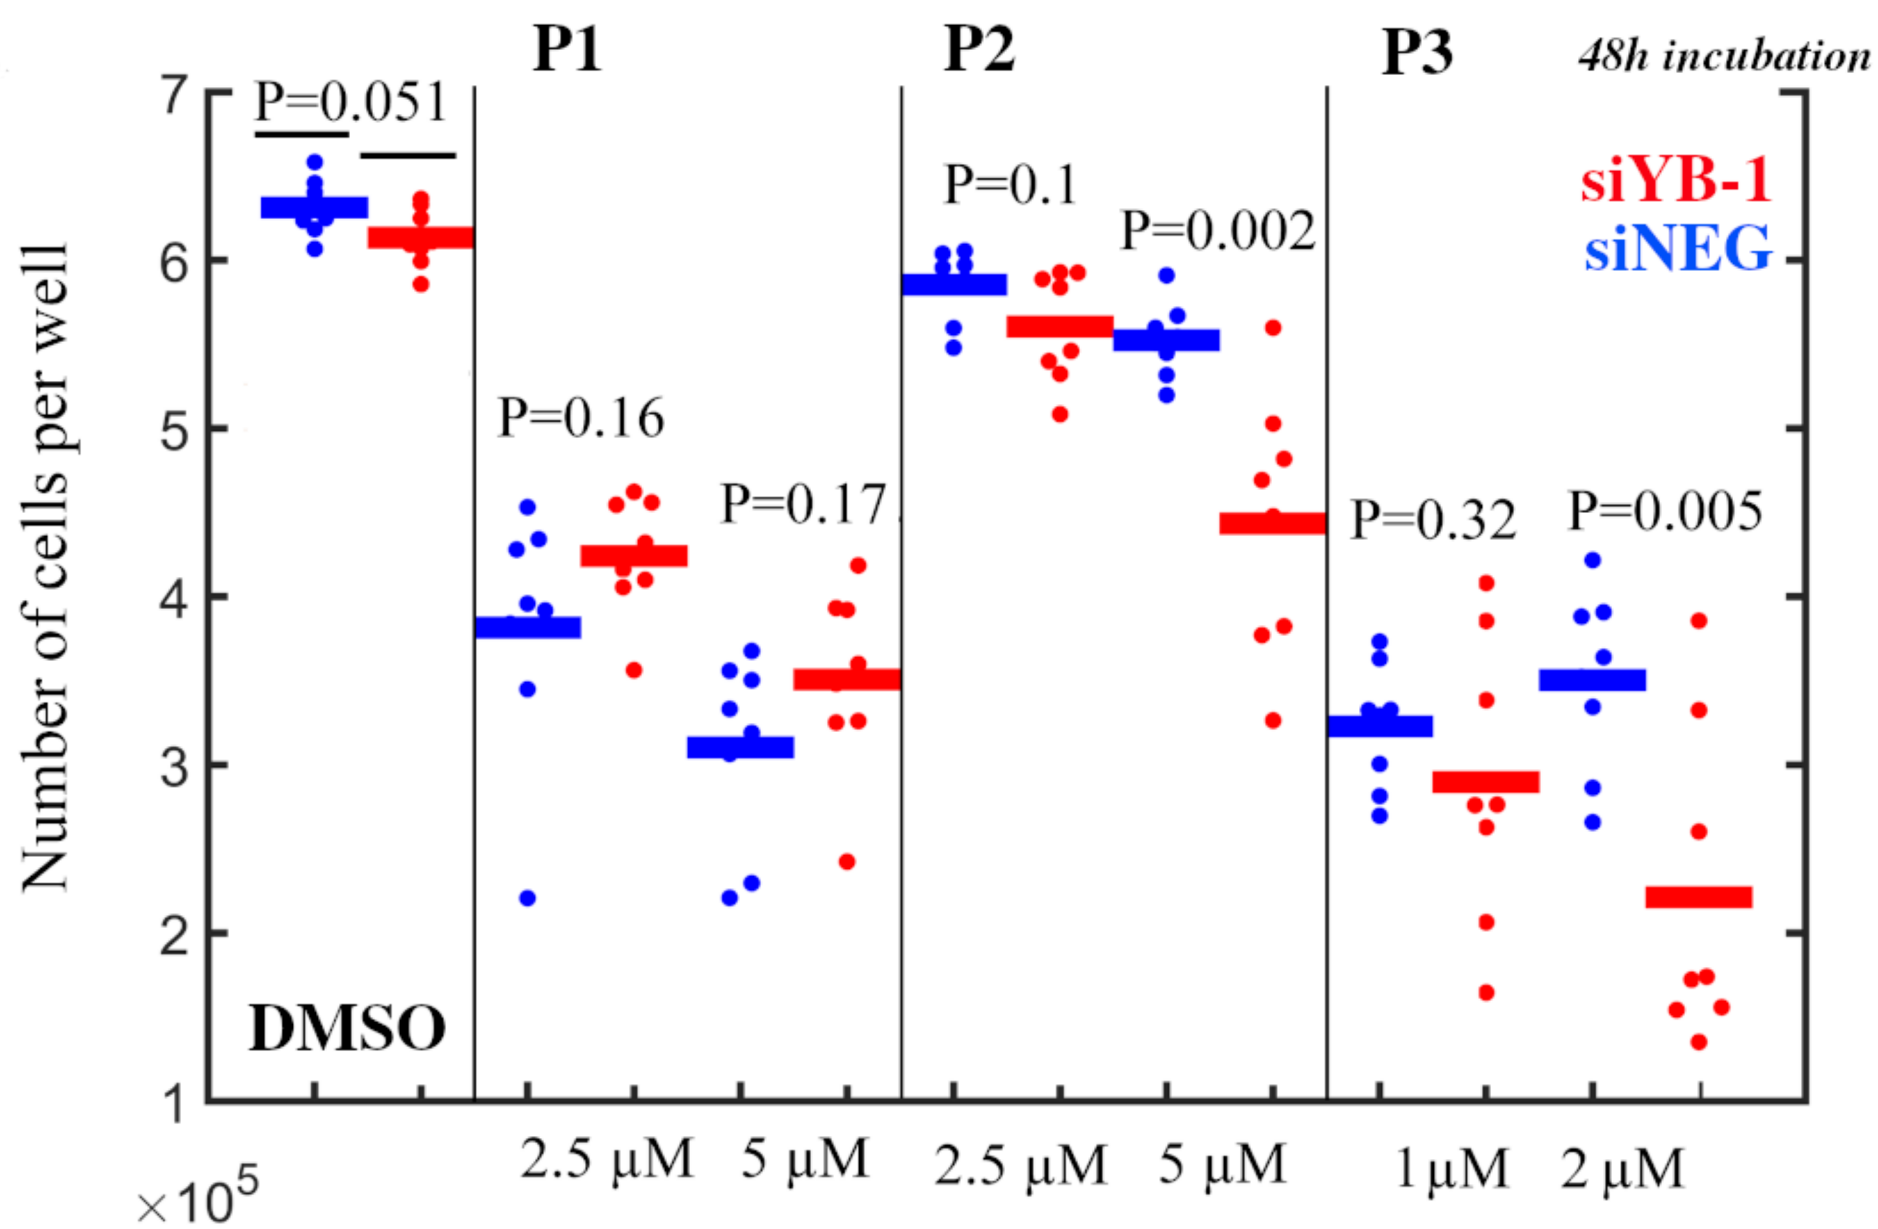

Supplement: supp [file elife-80387-supp-v1.zip]

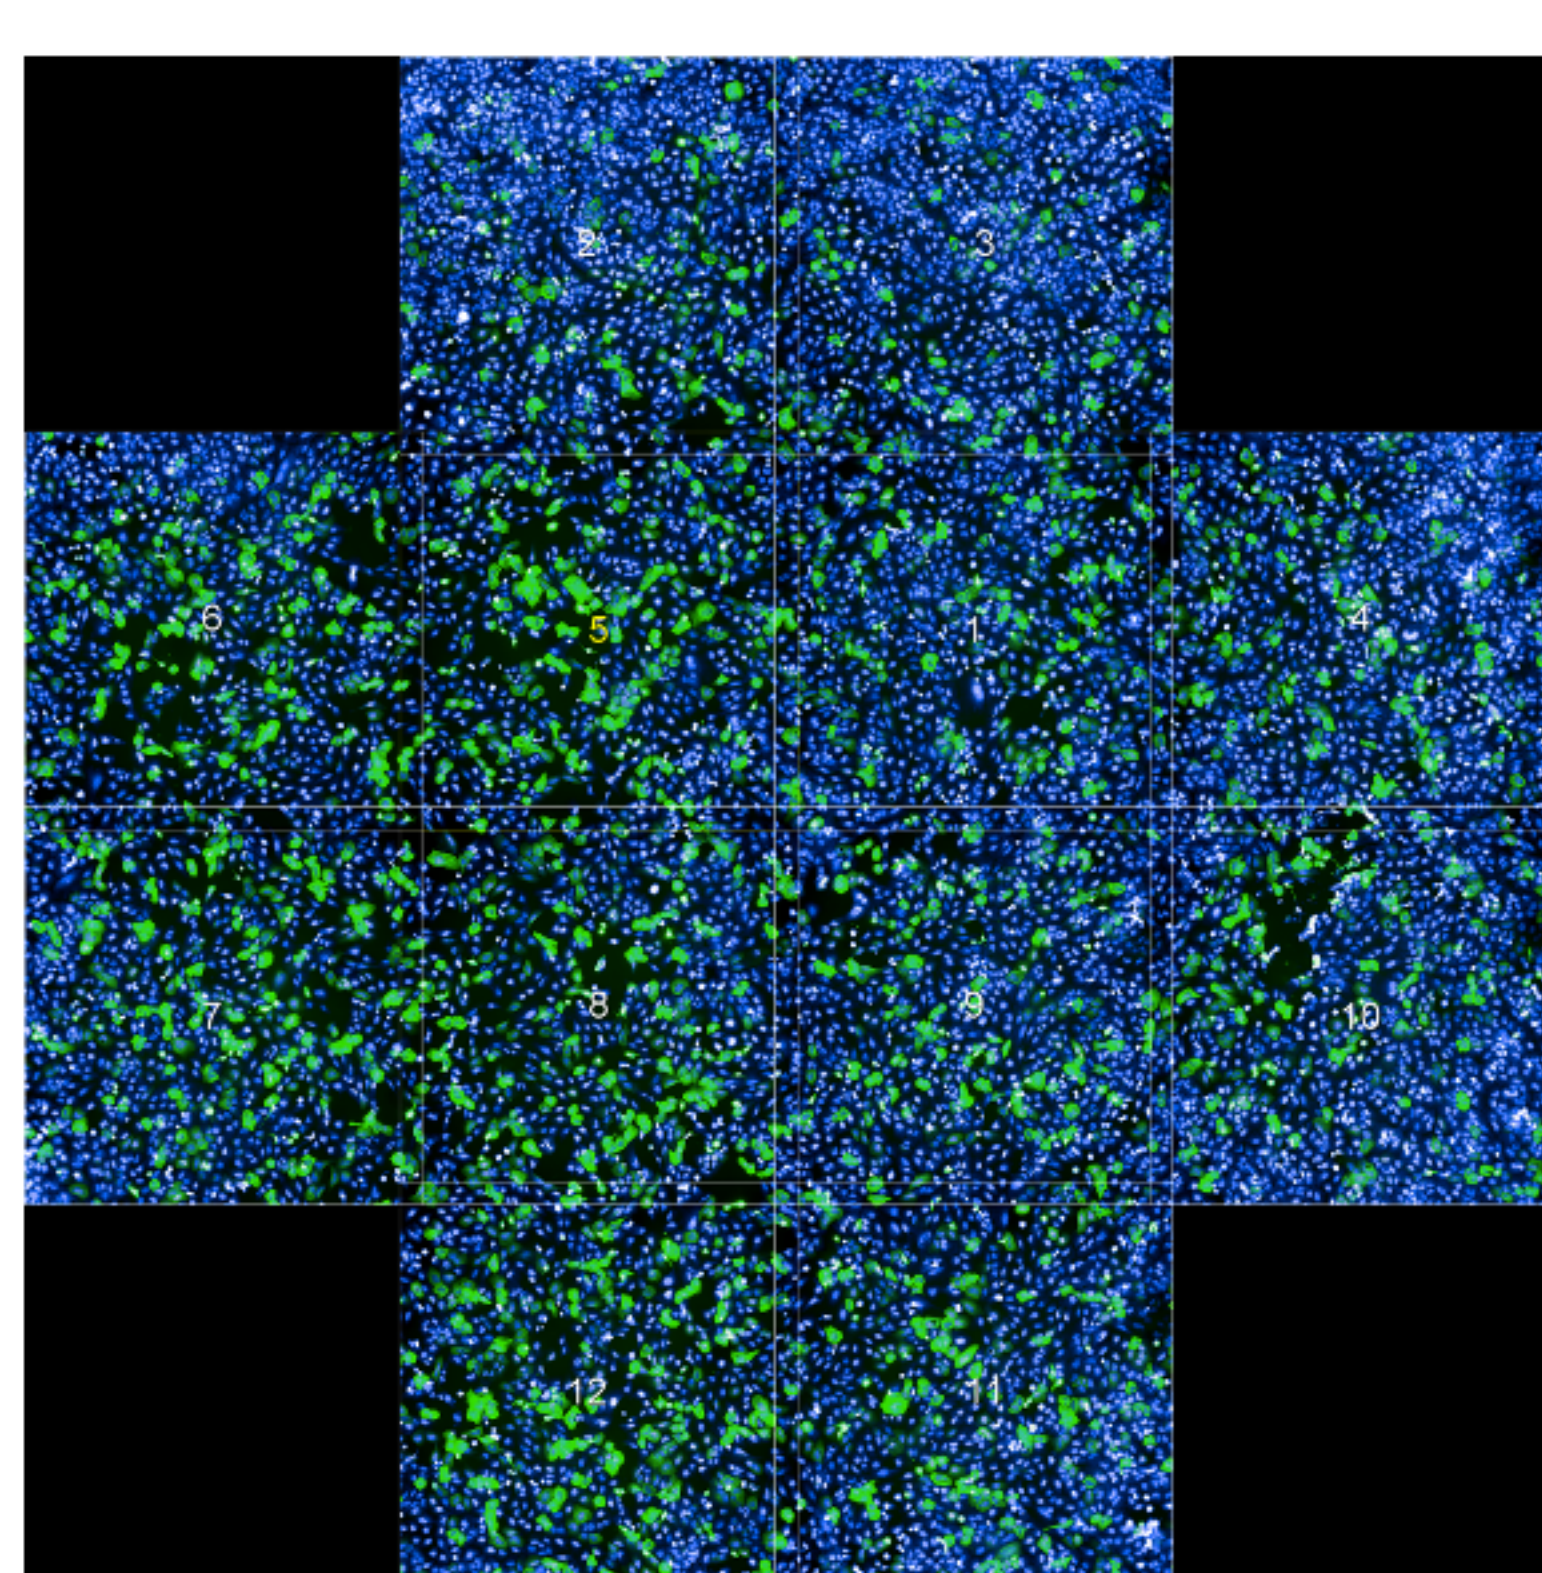

**a**

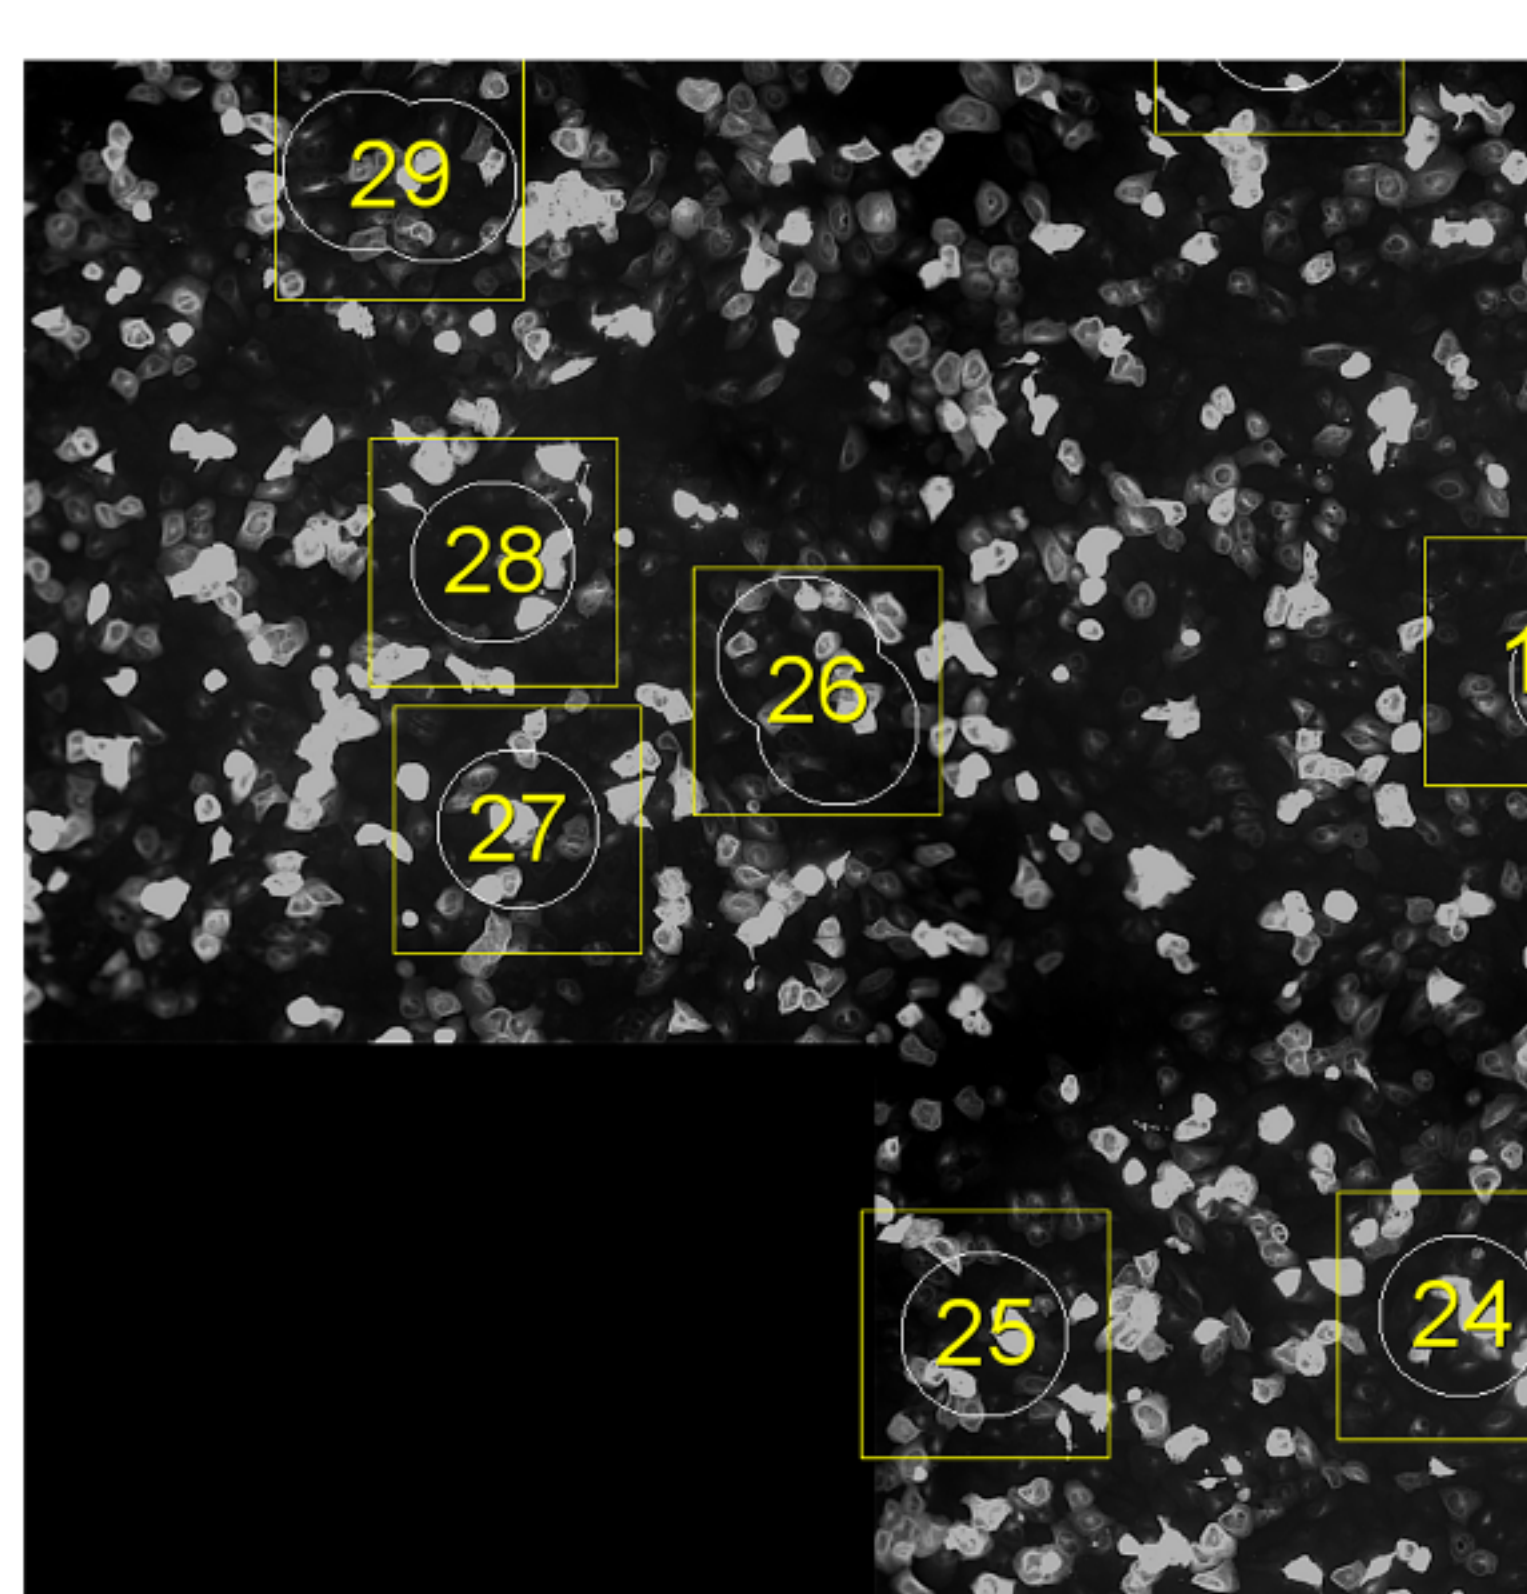

**b**

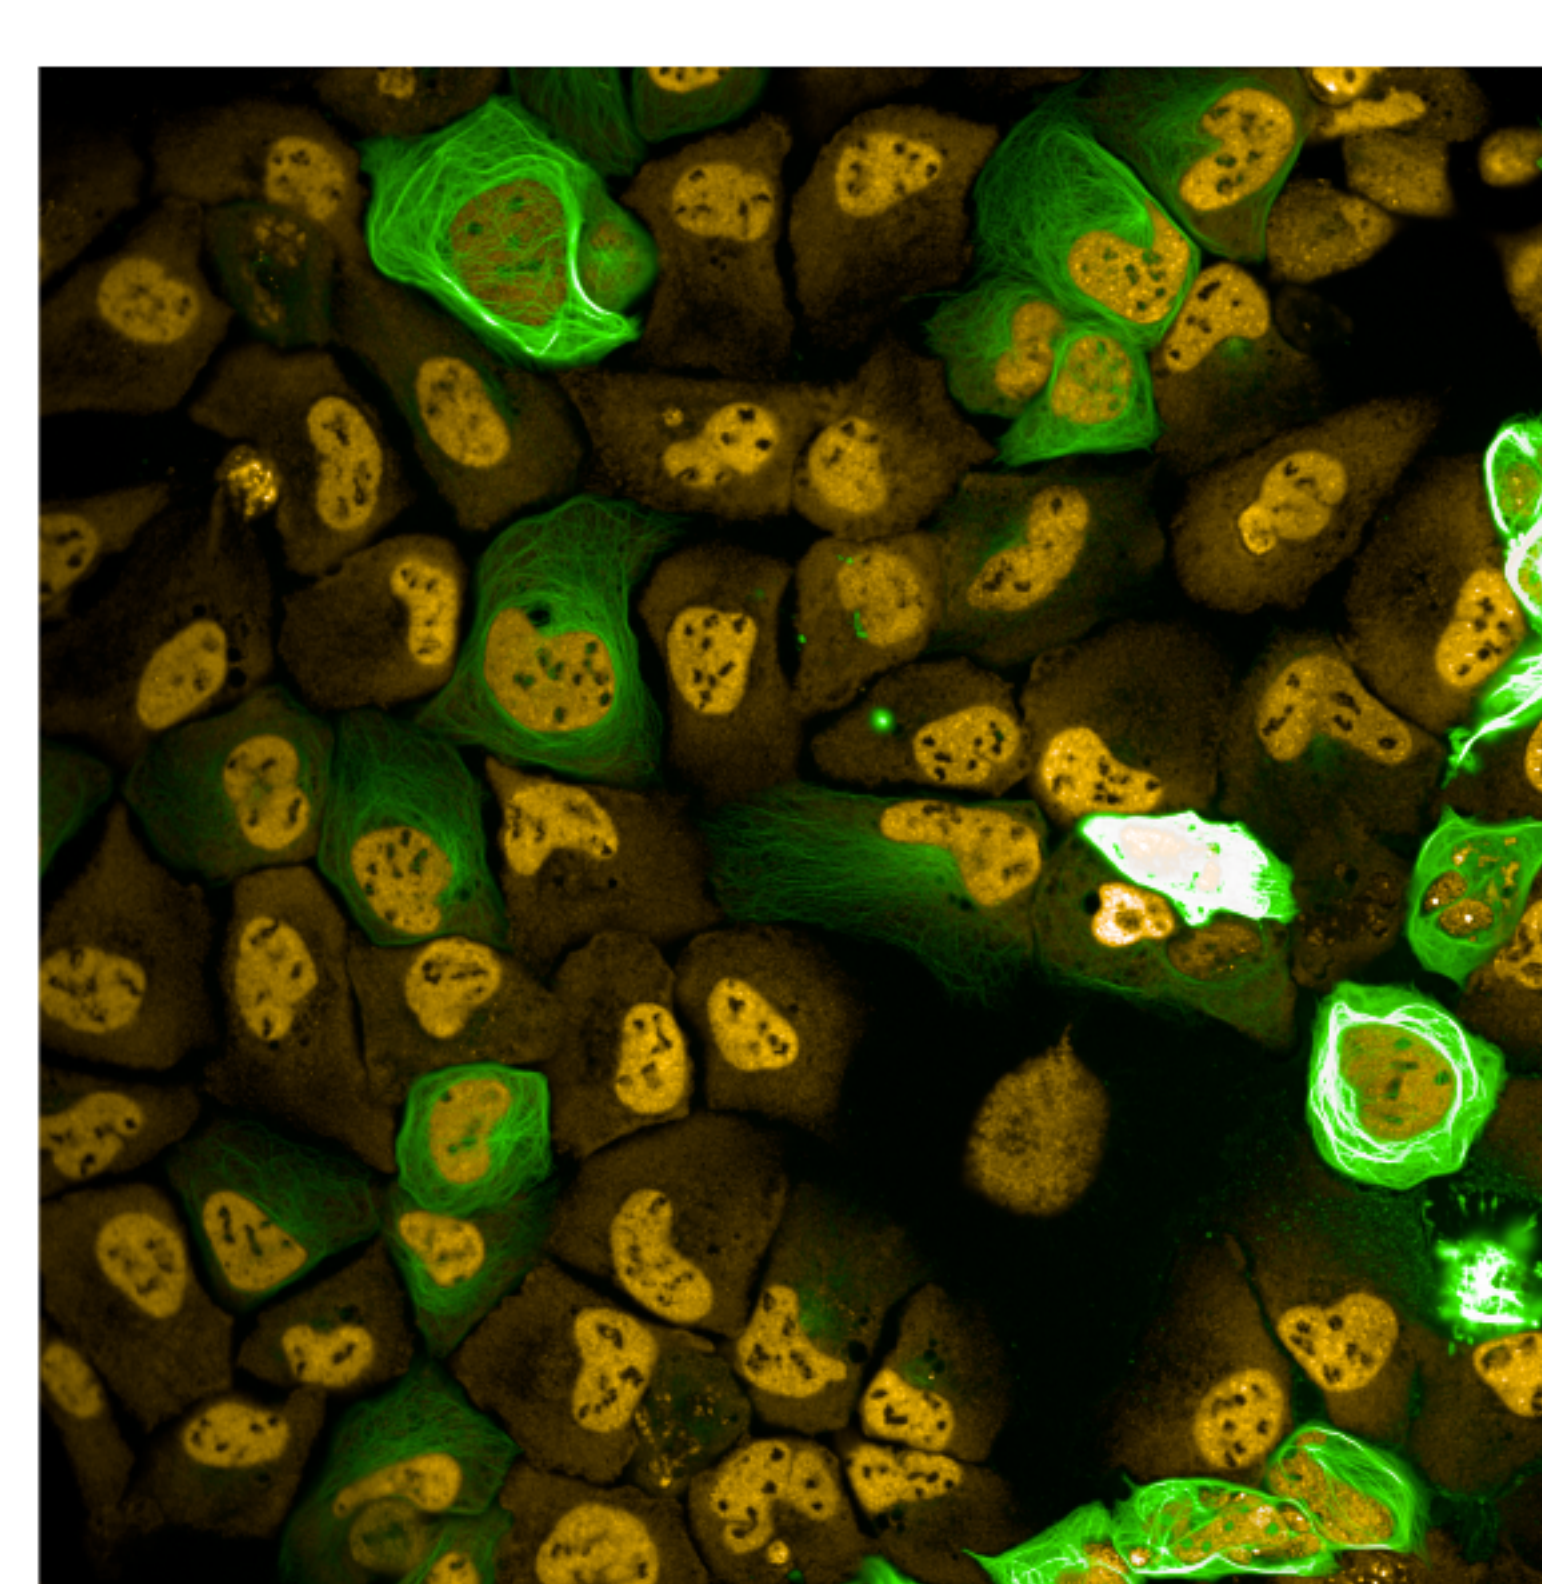

**c**

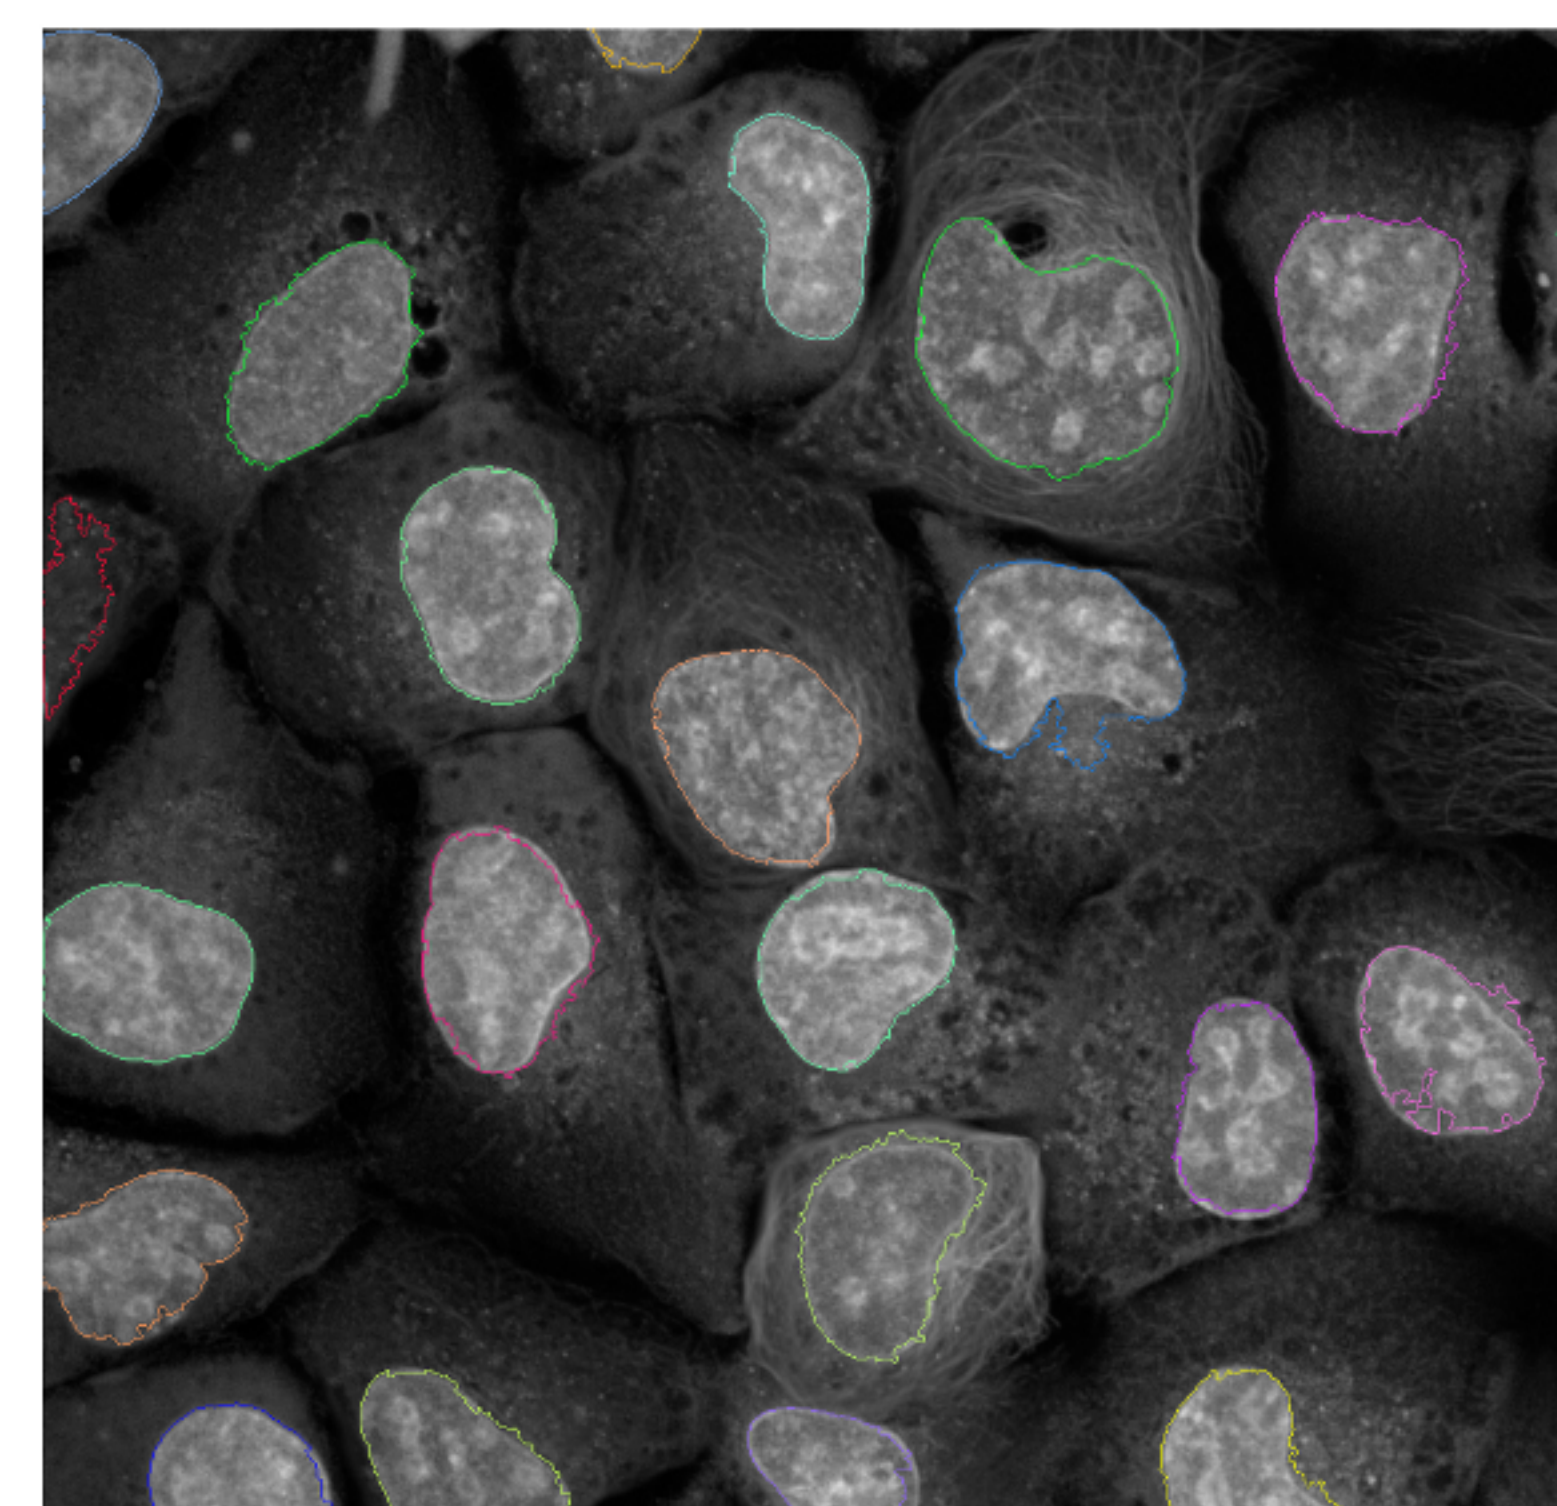

**d**

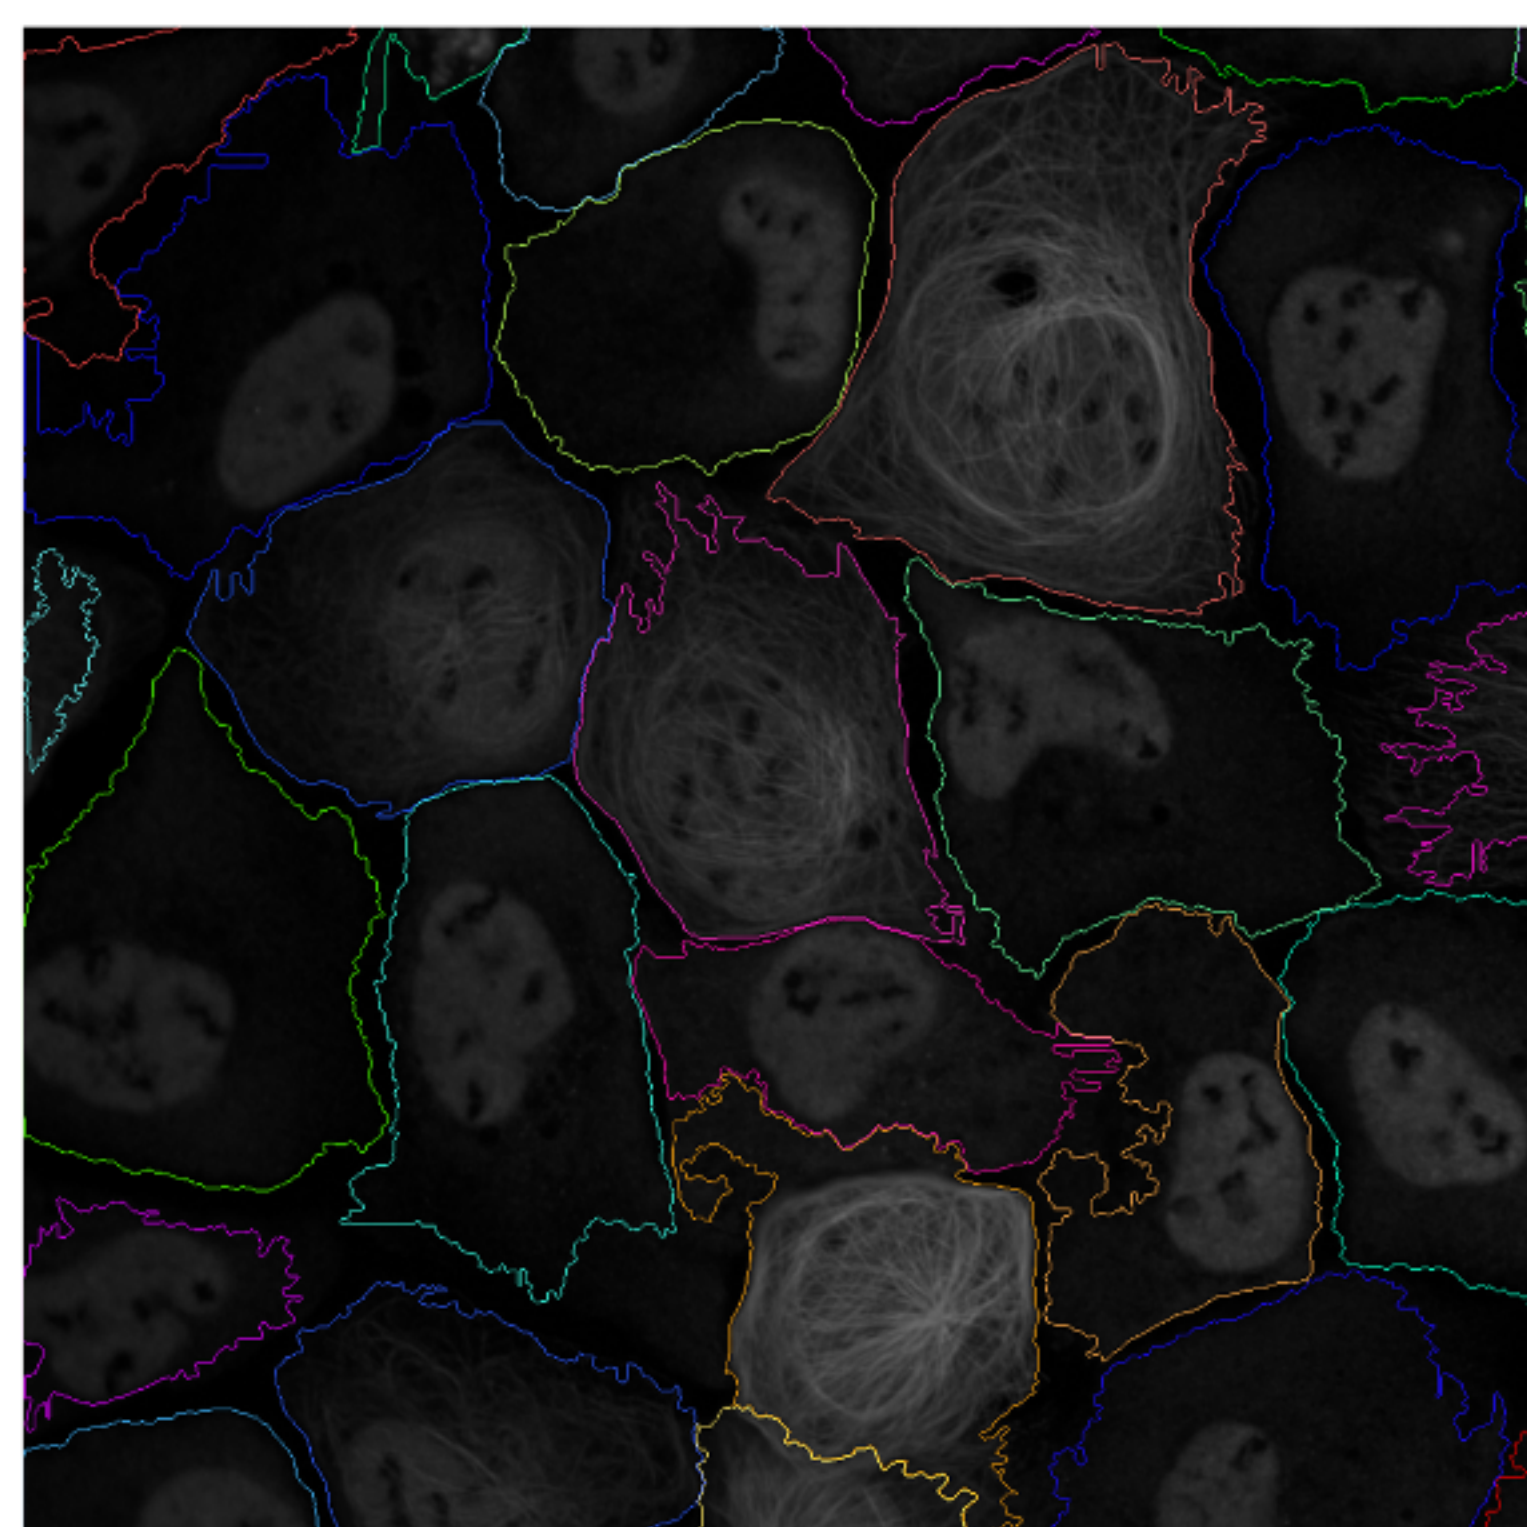

**e**

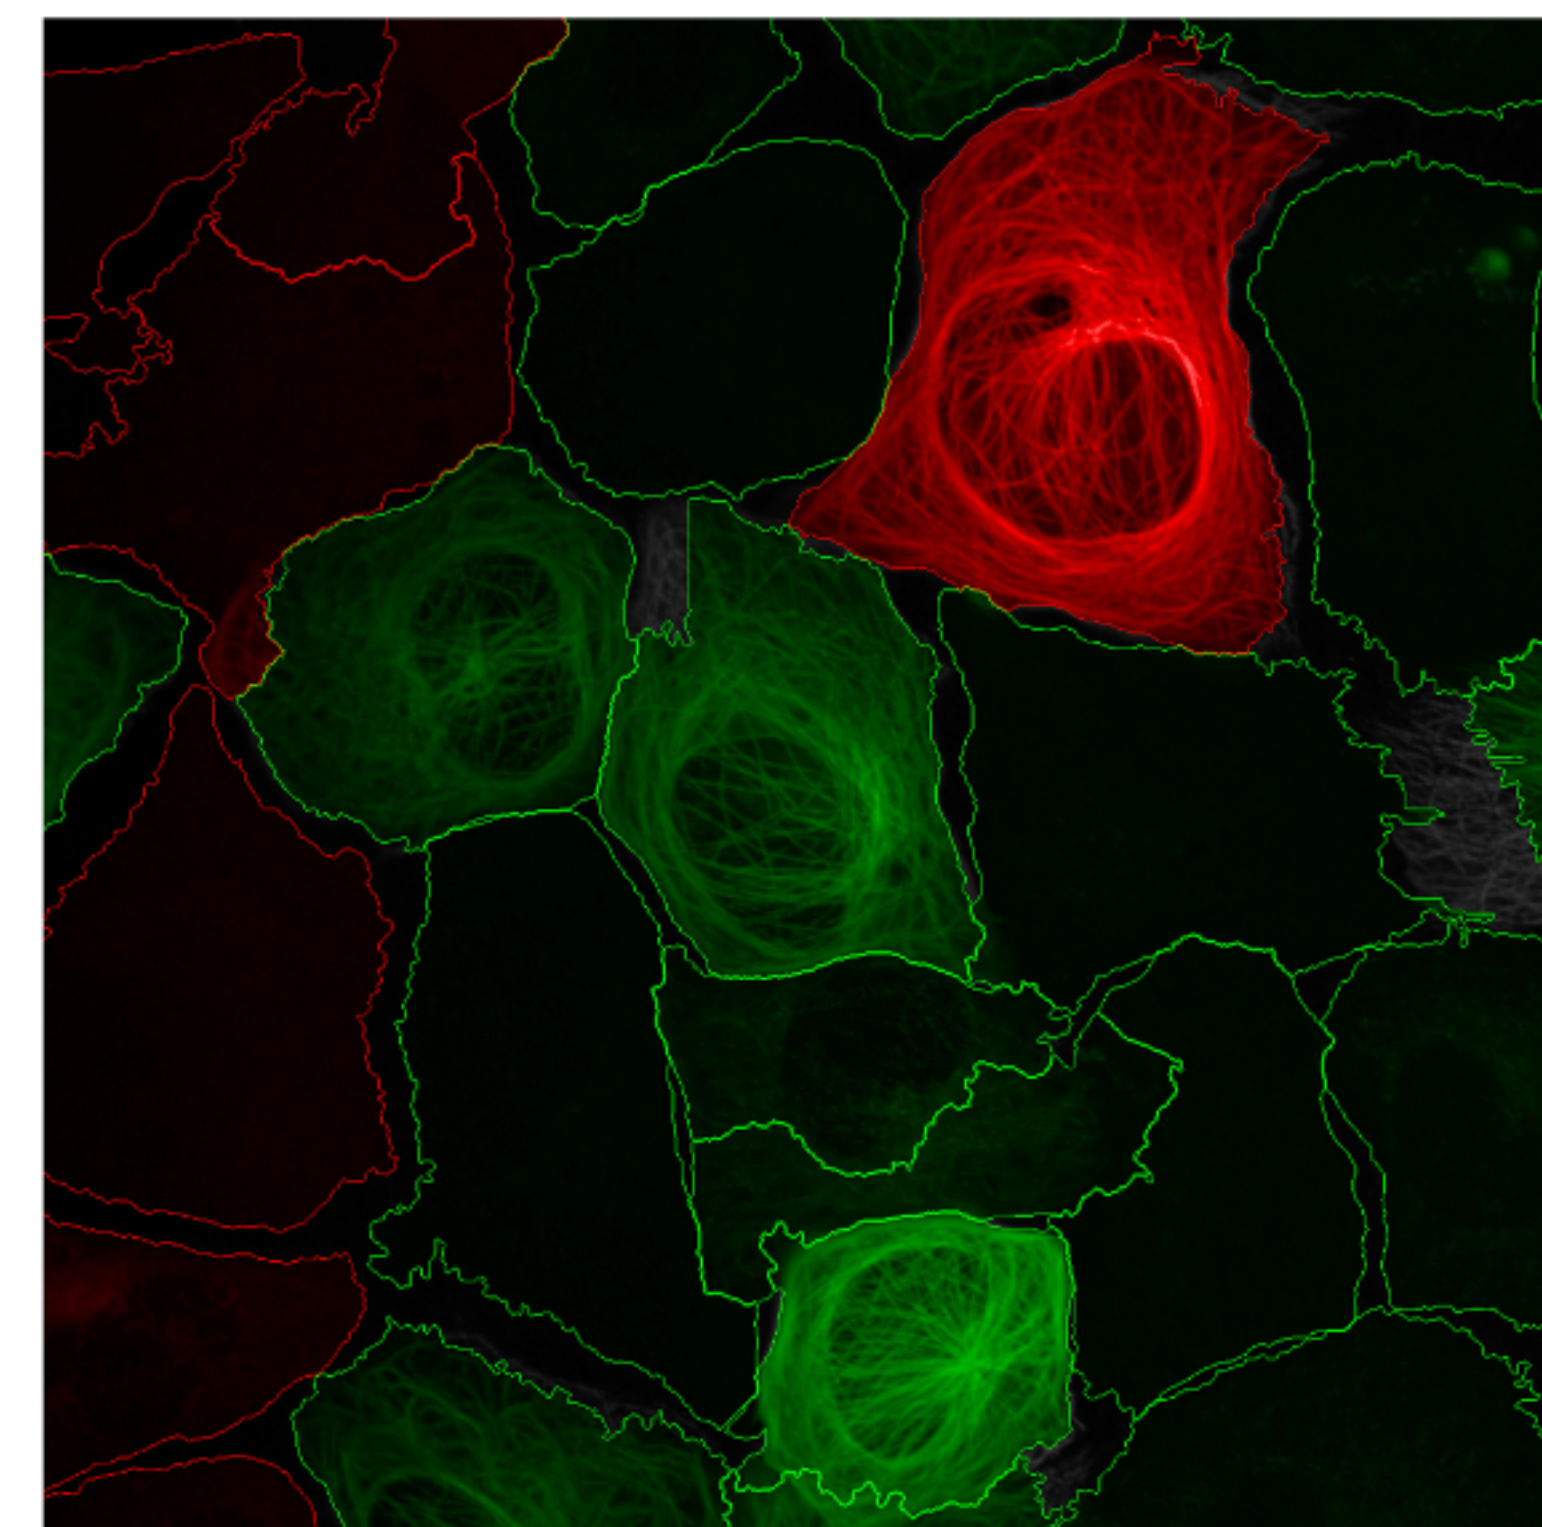

**f**

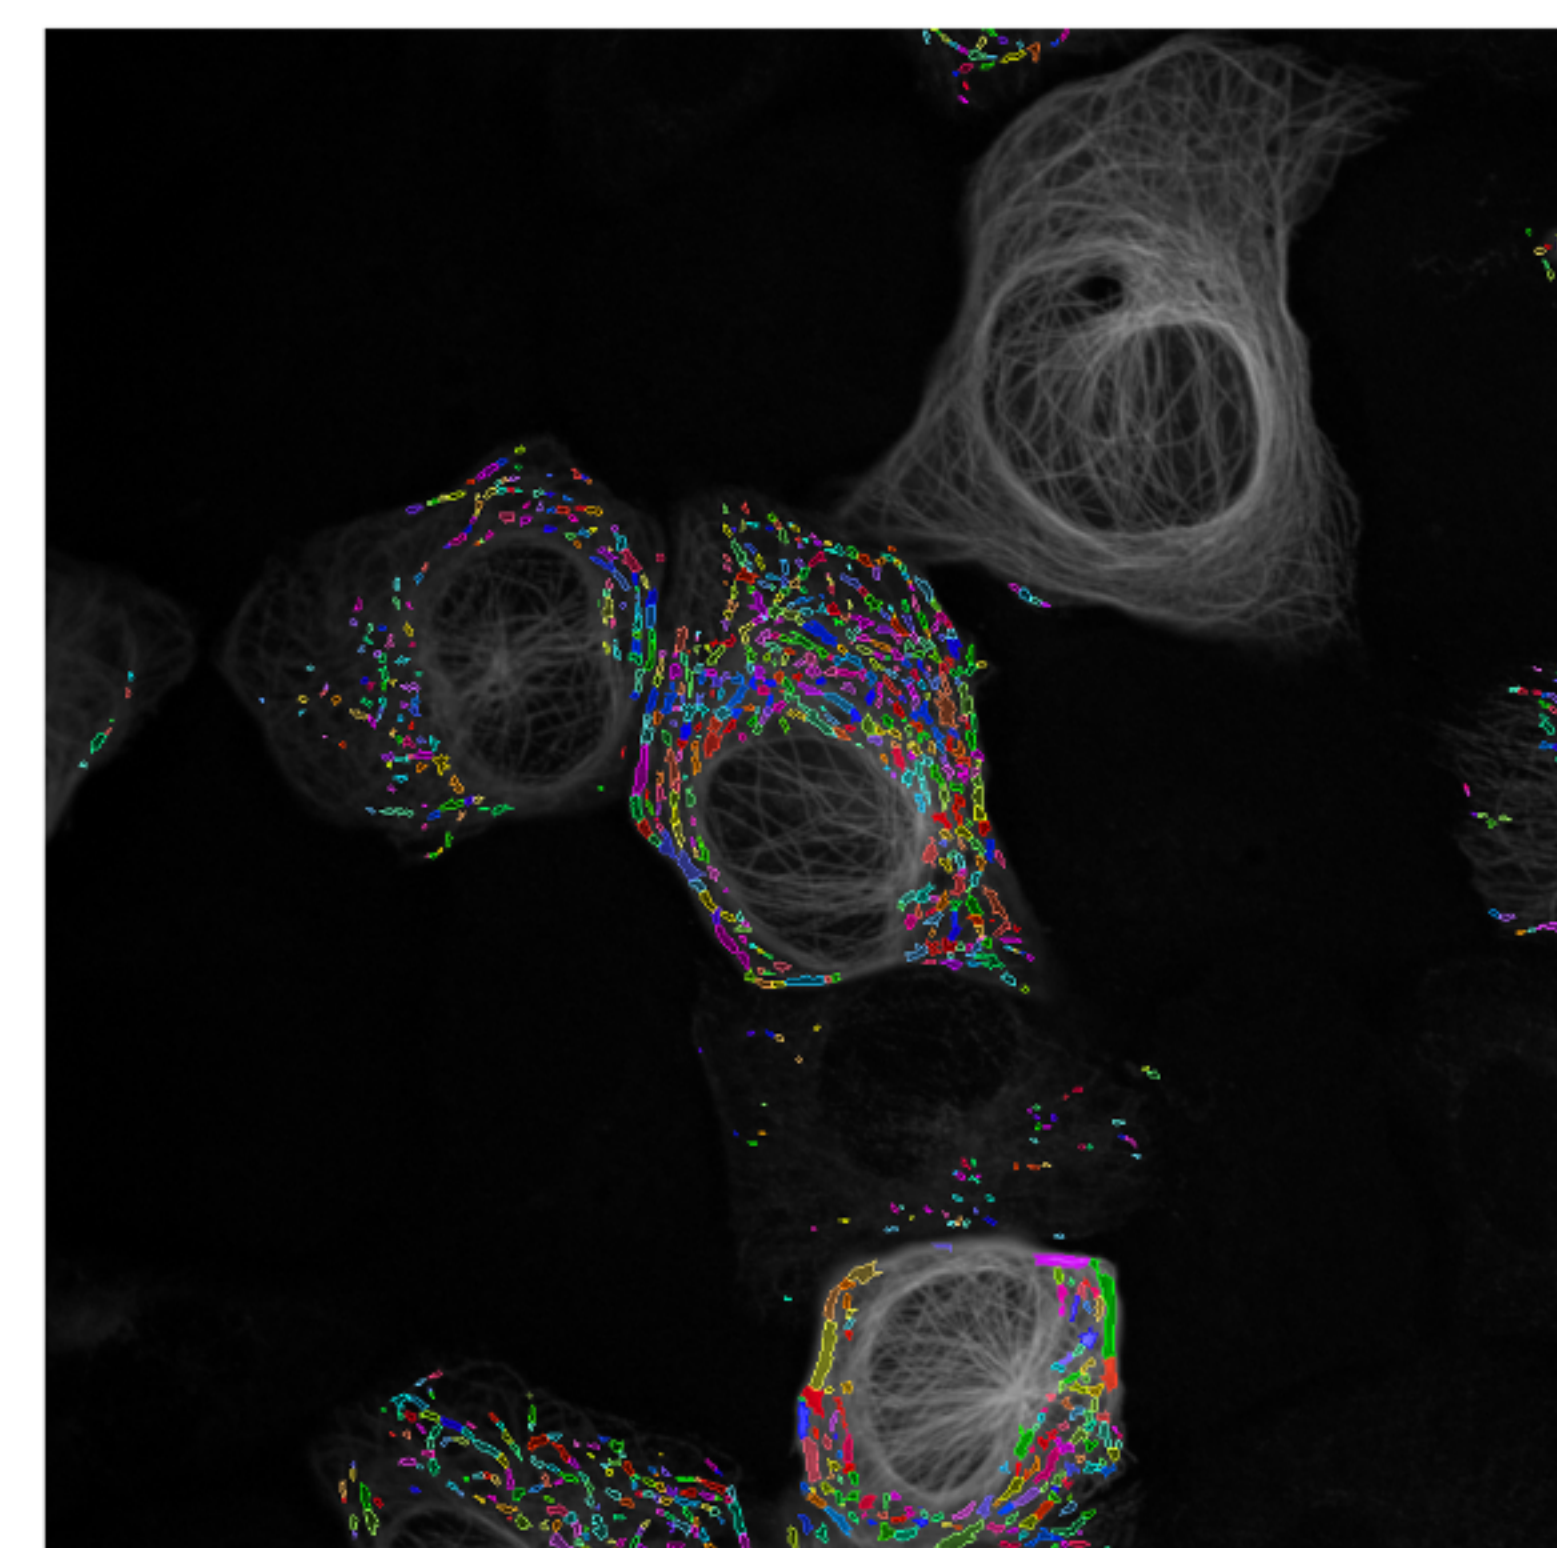

**g**

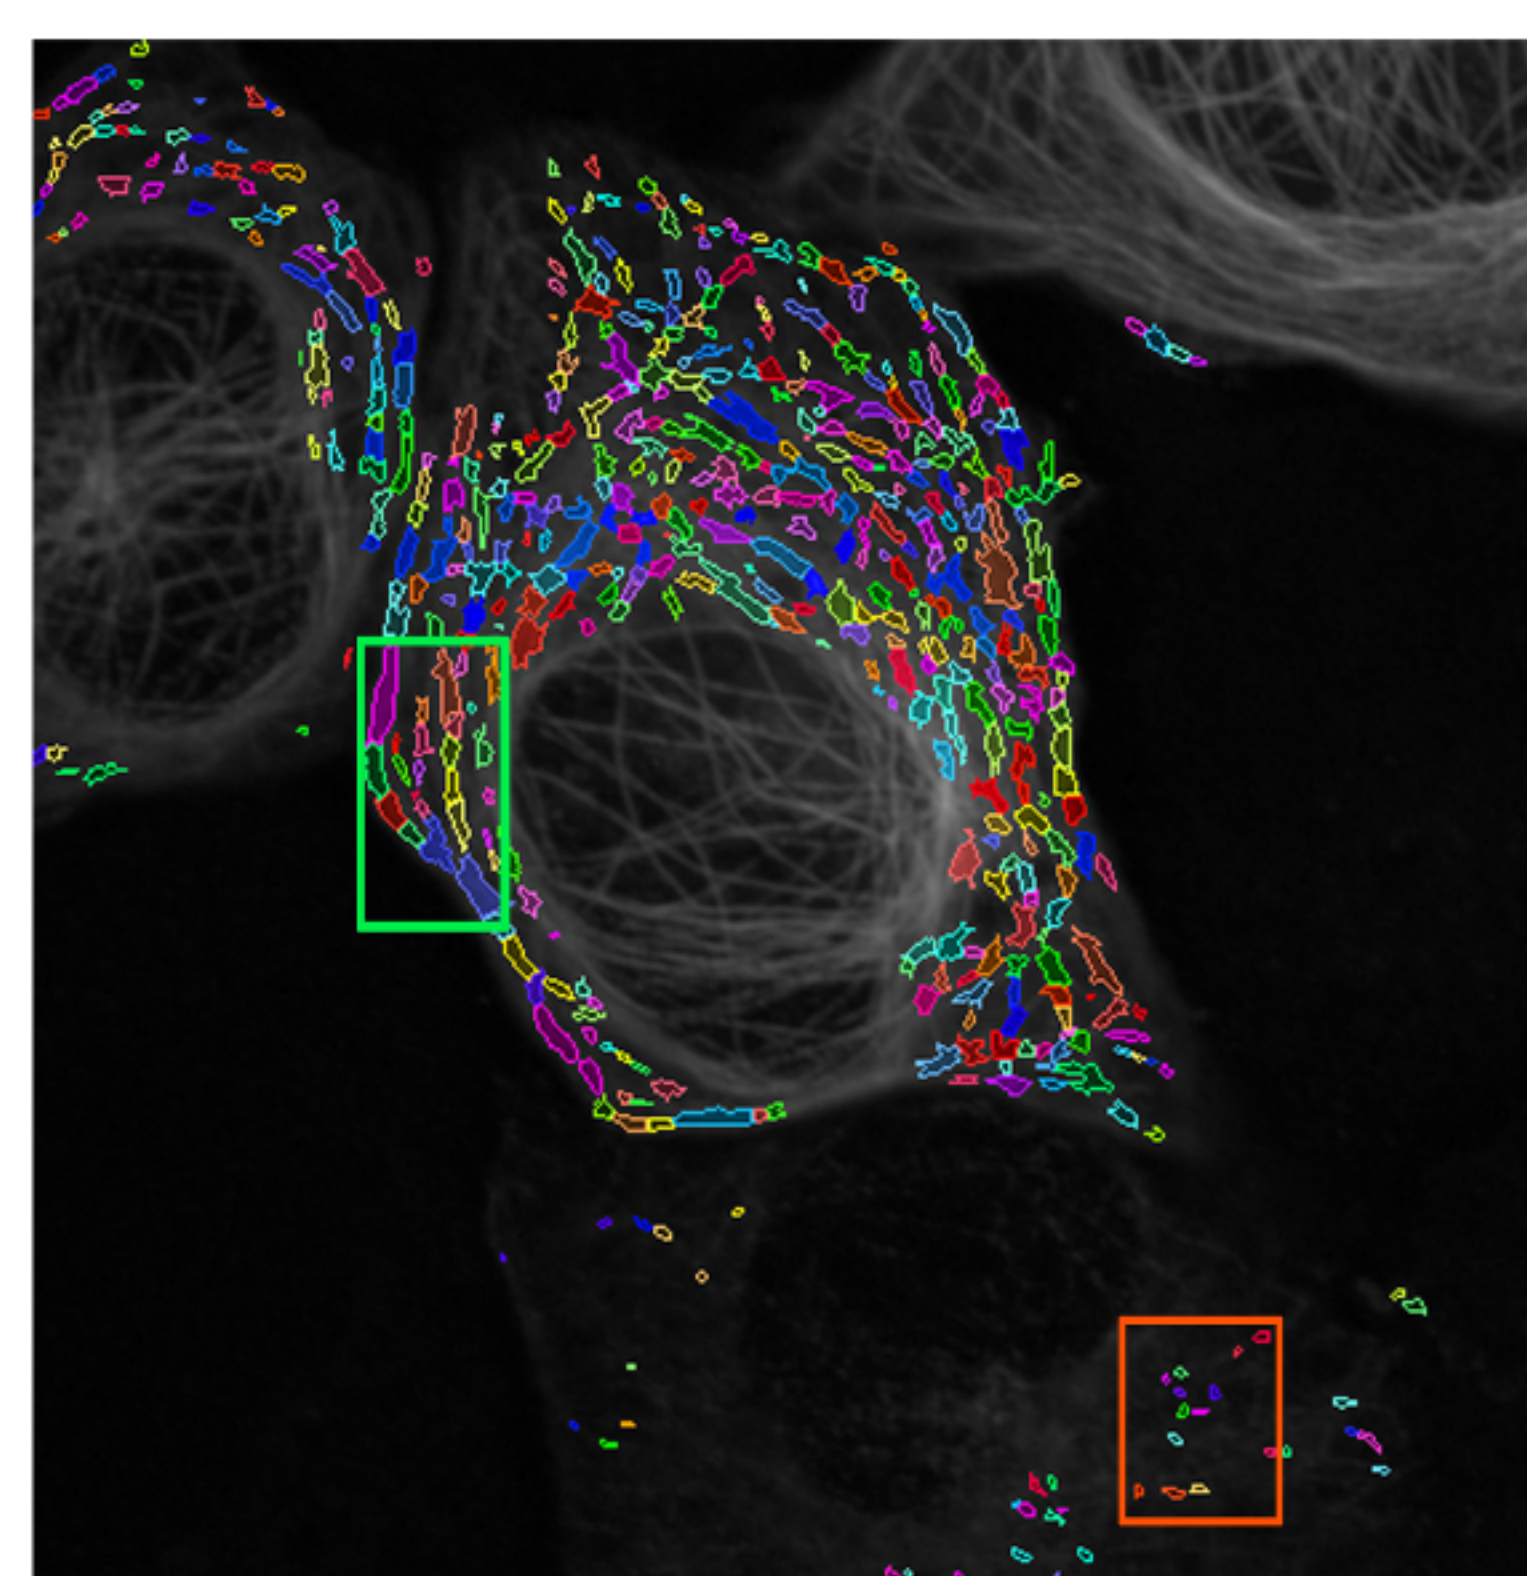

**h**

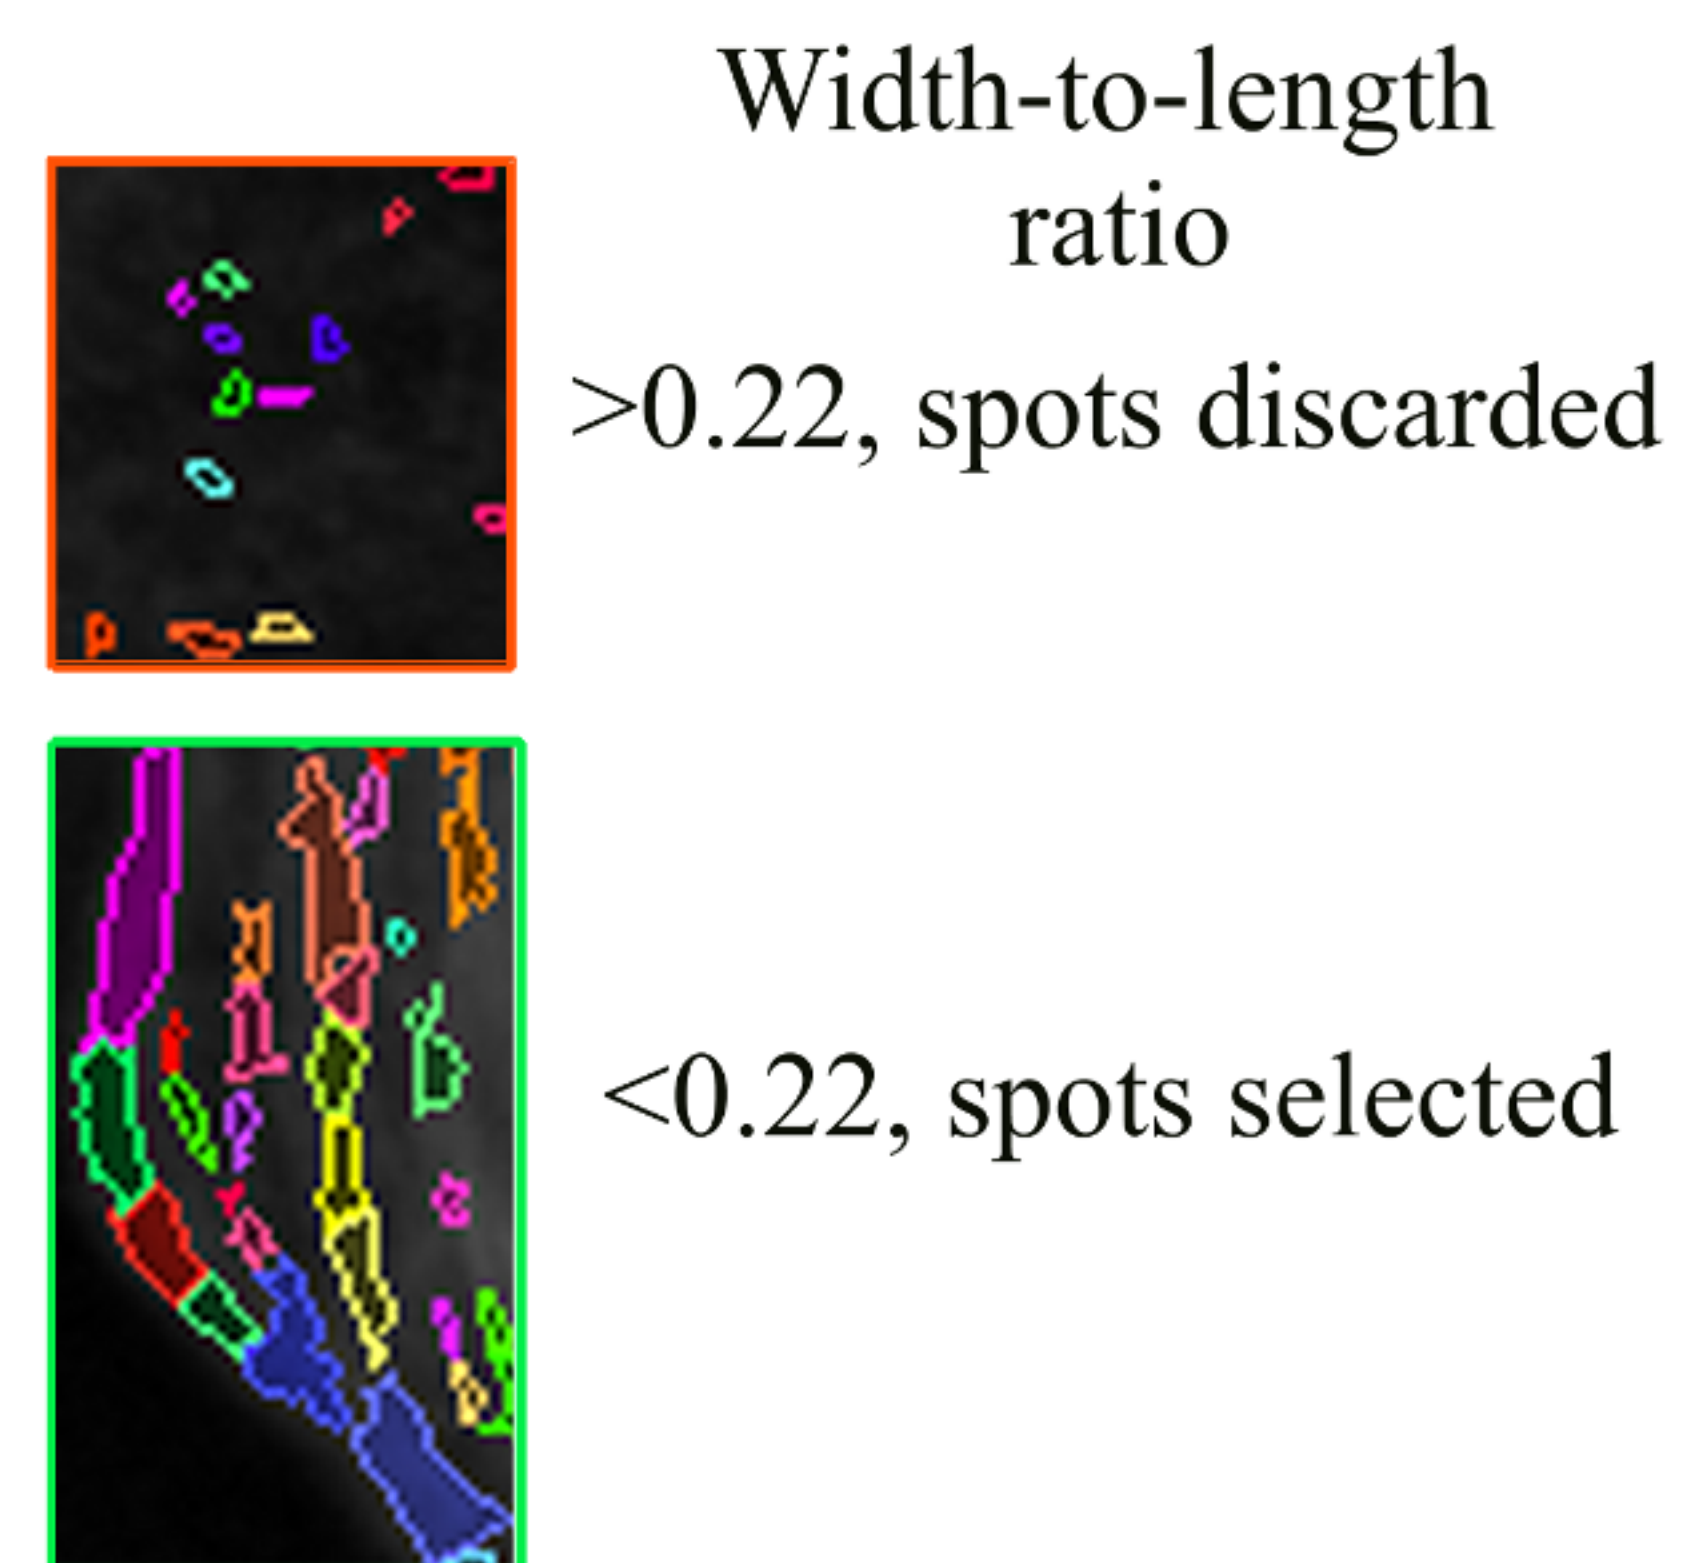

Supplement: supp [file elife-80387-supp-v1.zip › elife_poa_e80387_Figure_3_figure_supplement_1.pdf]

**a****DNA-processing proteins**

Bait

mRNA

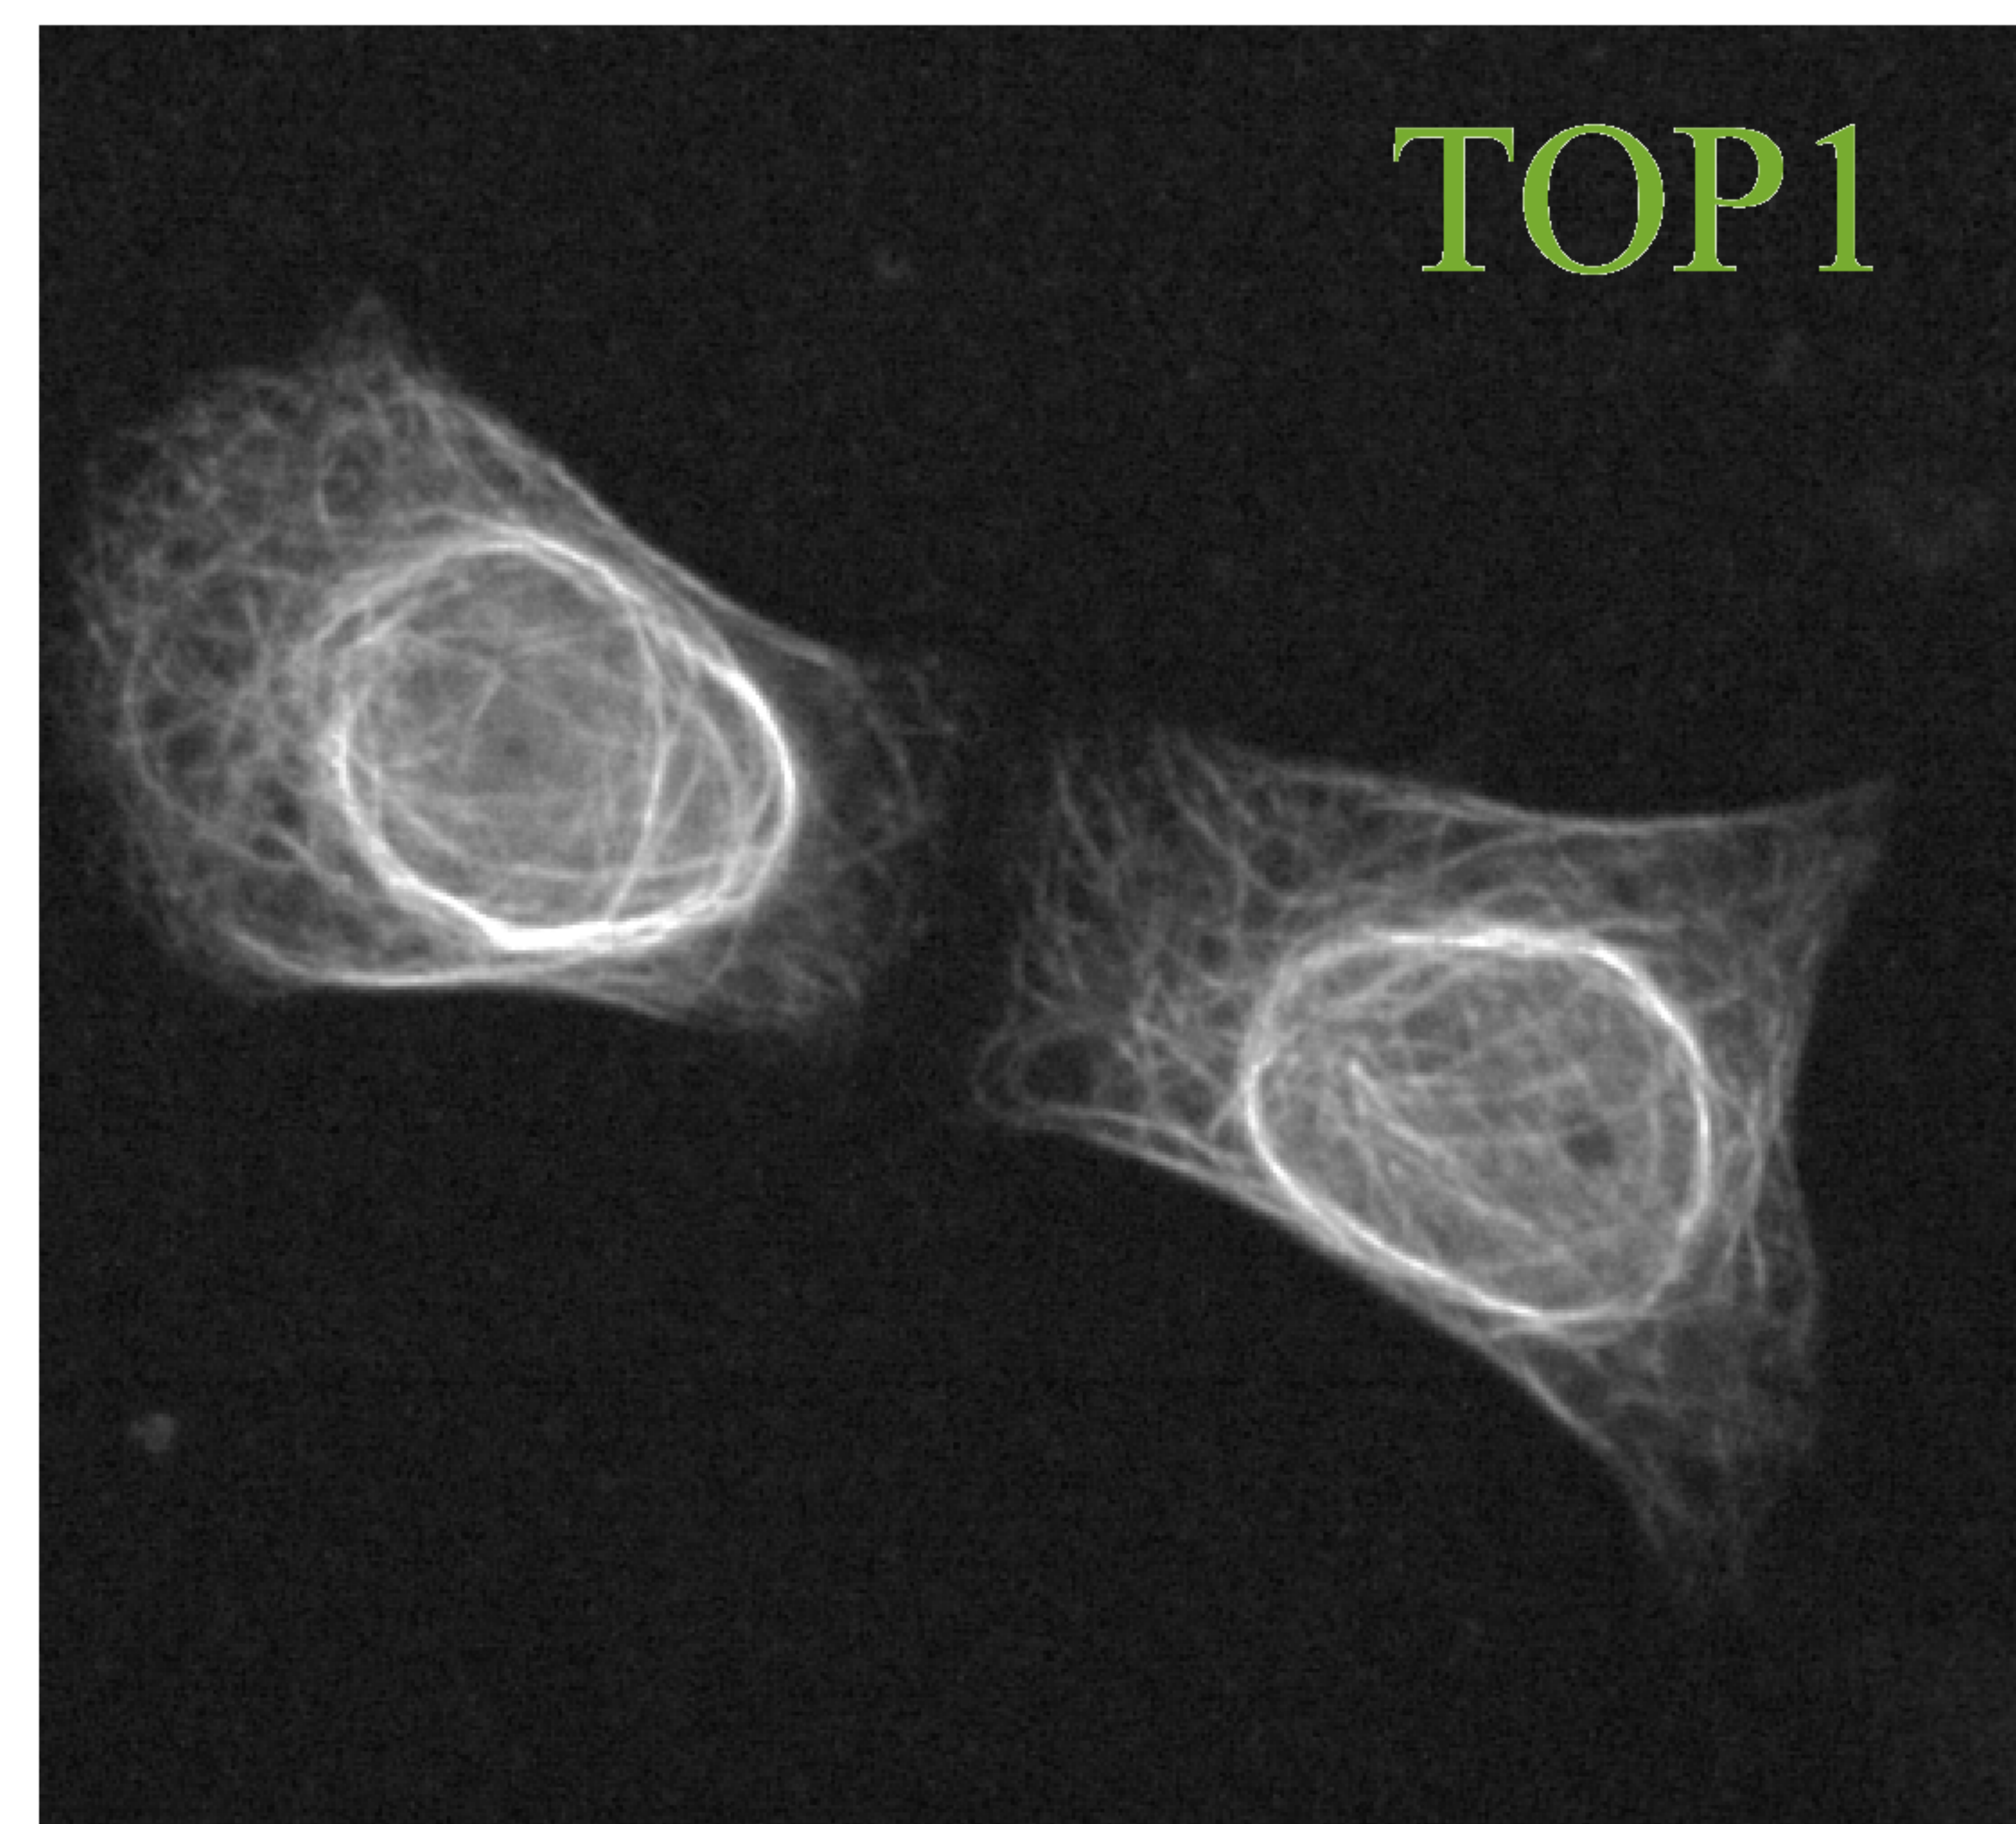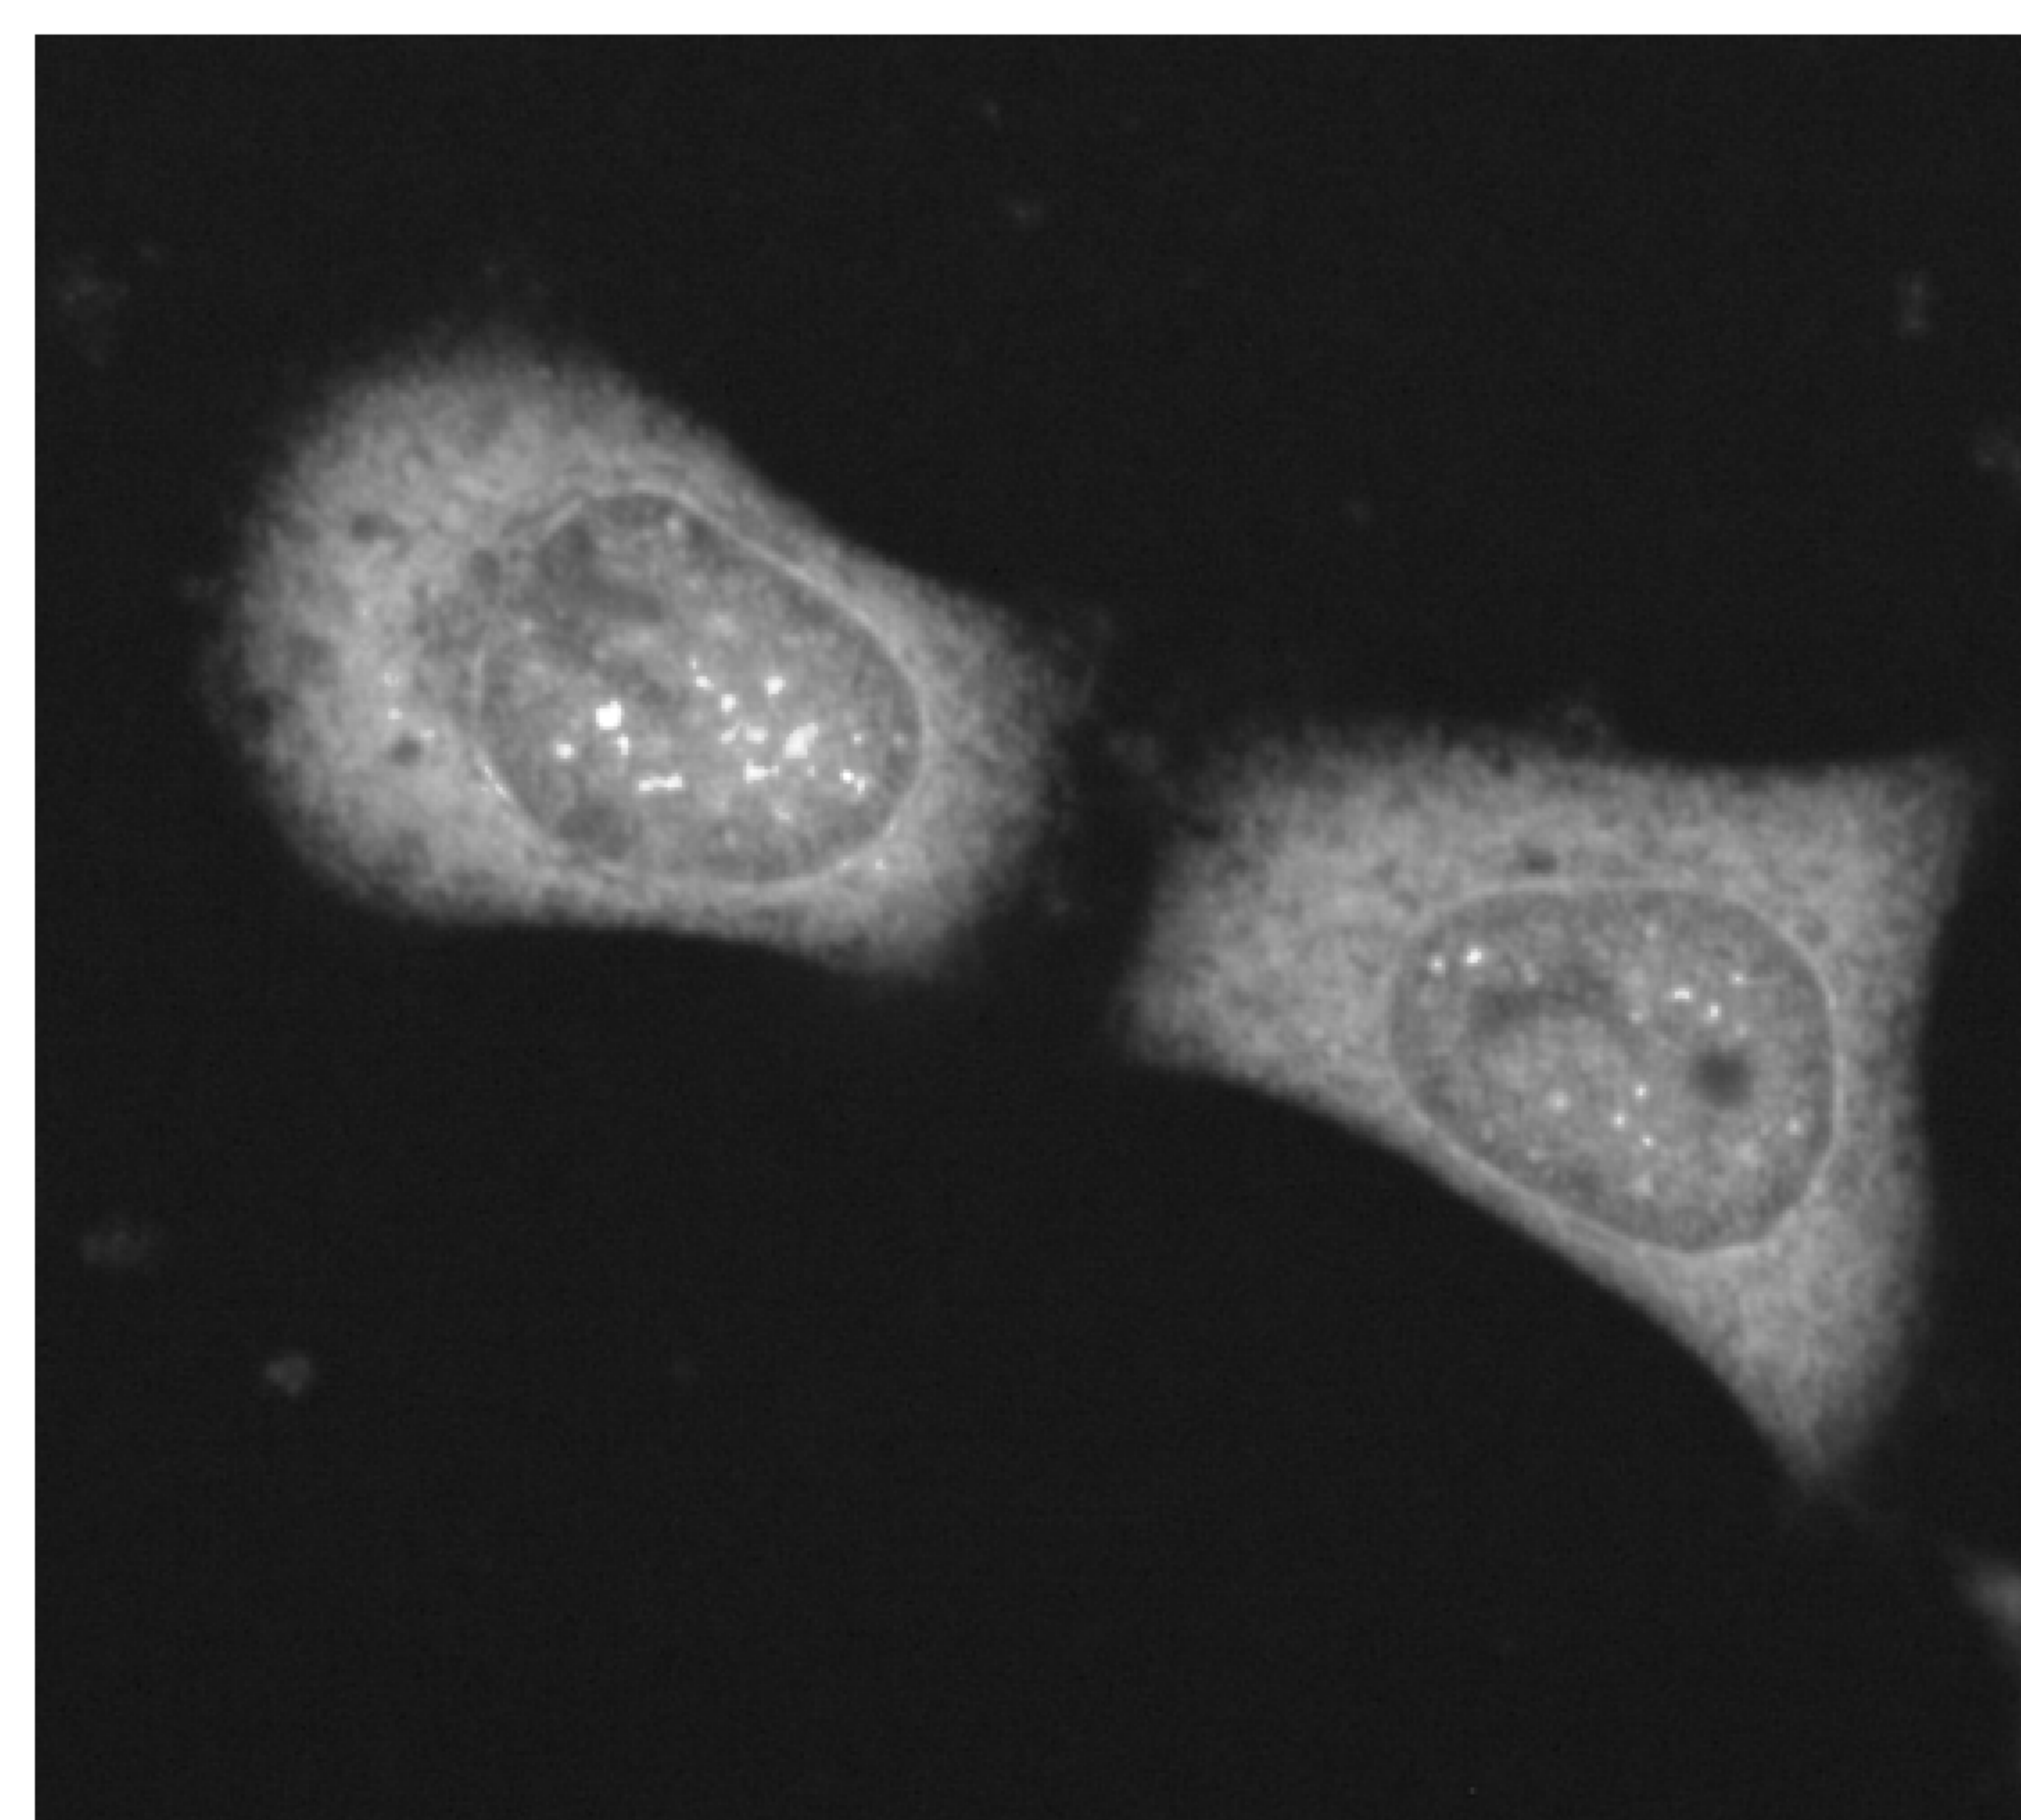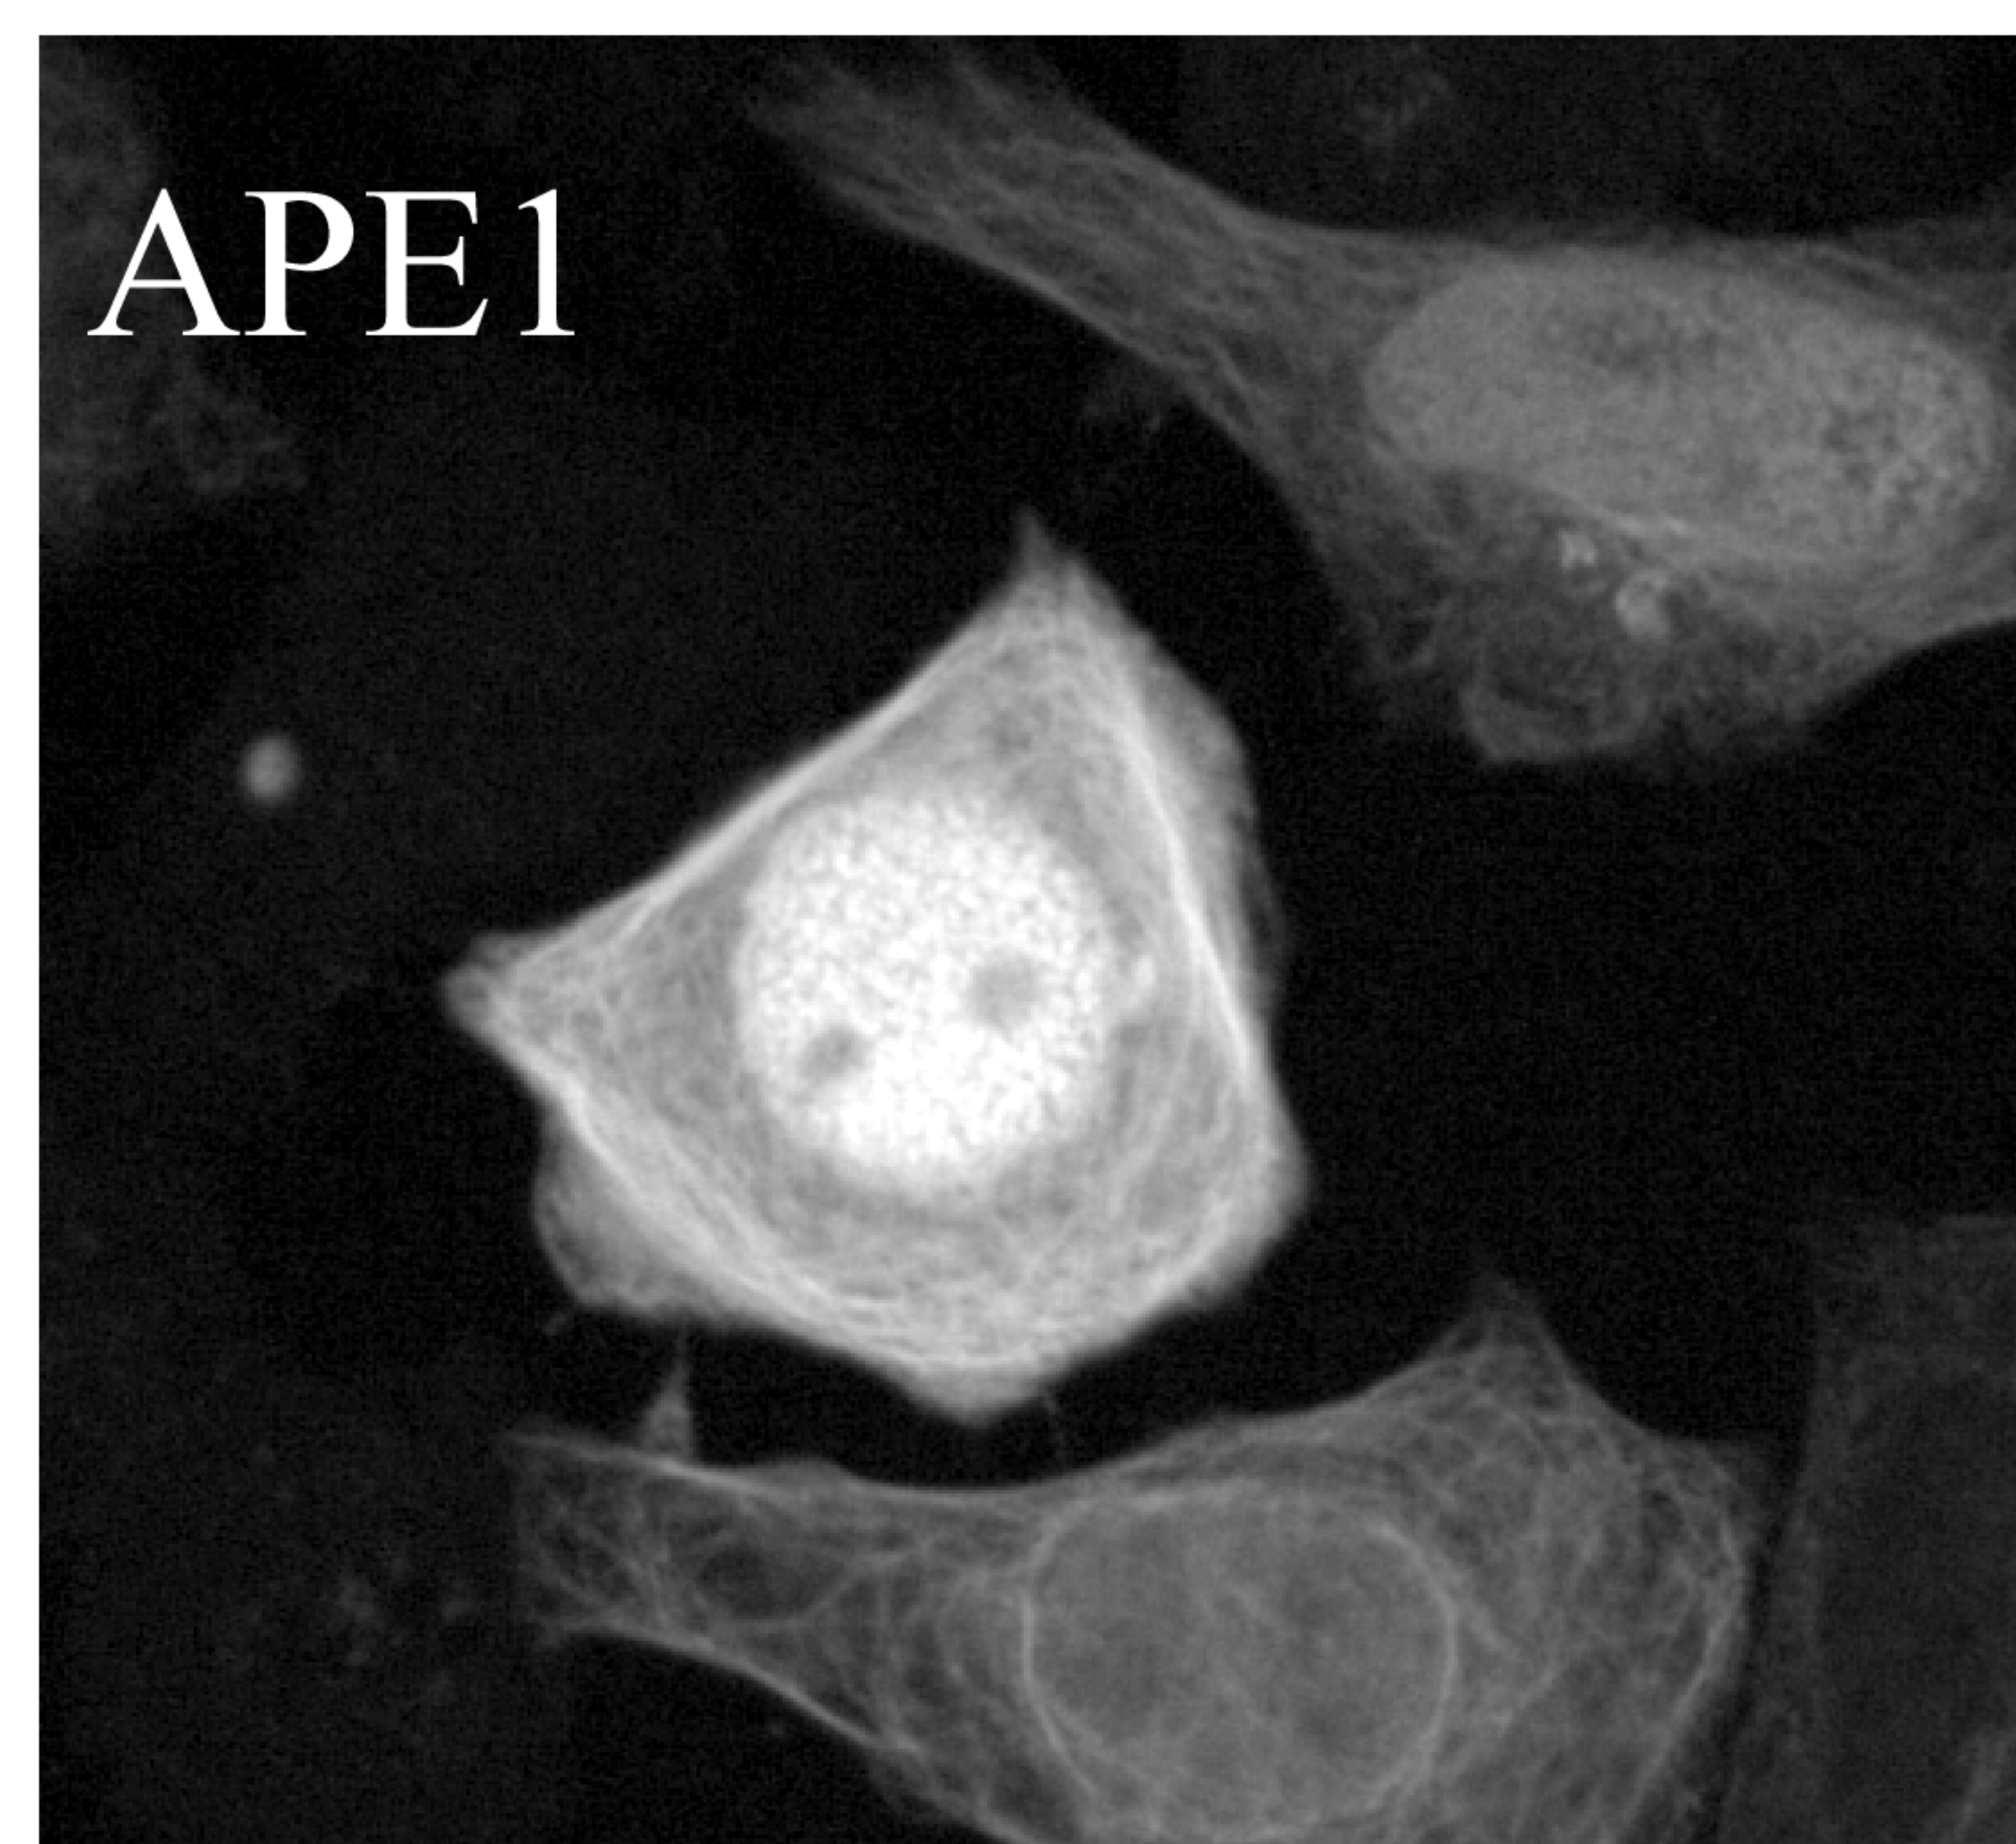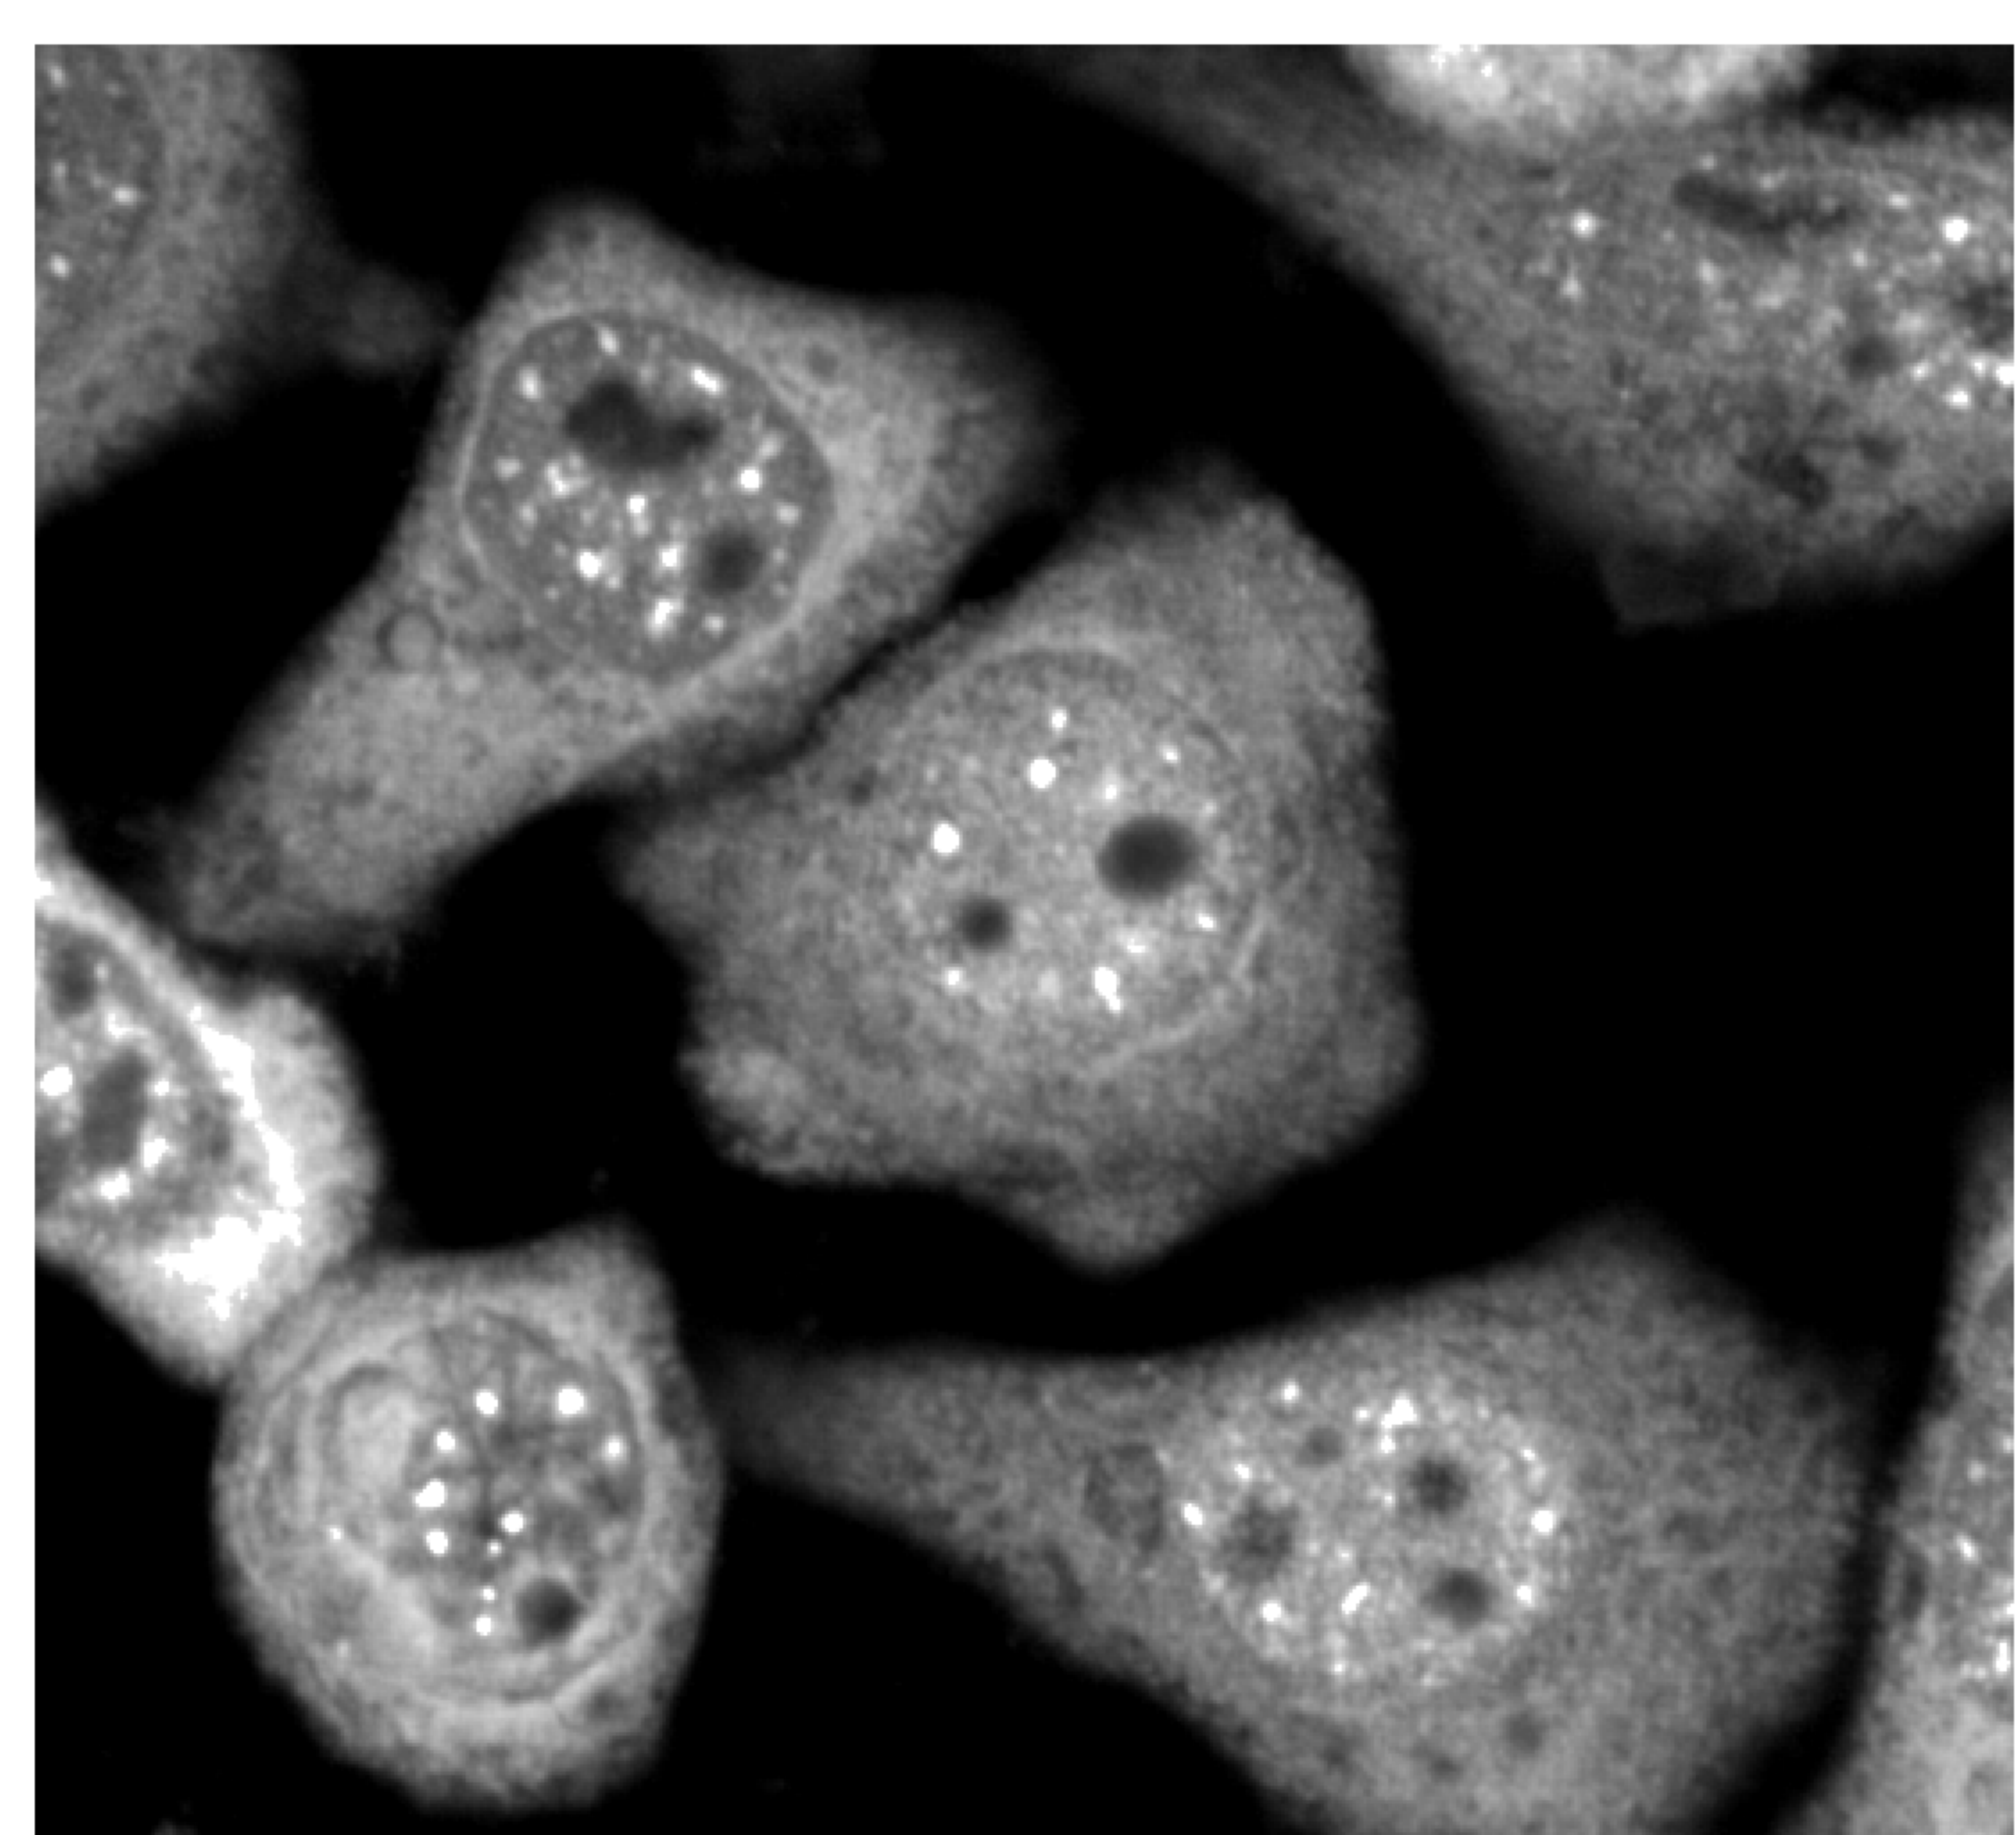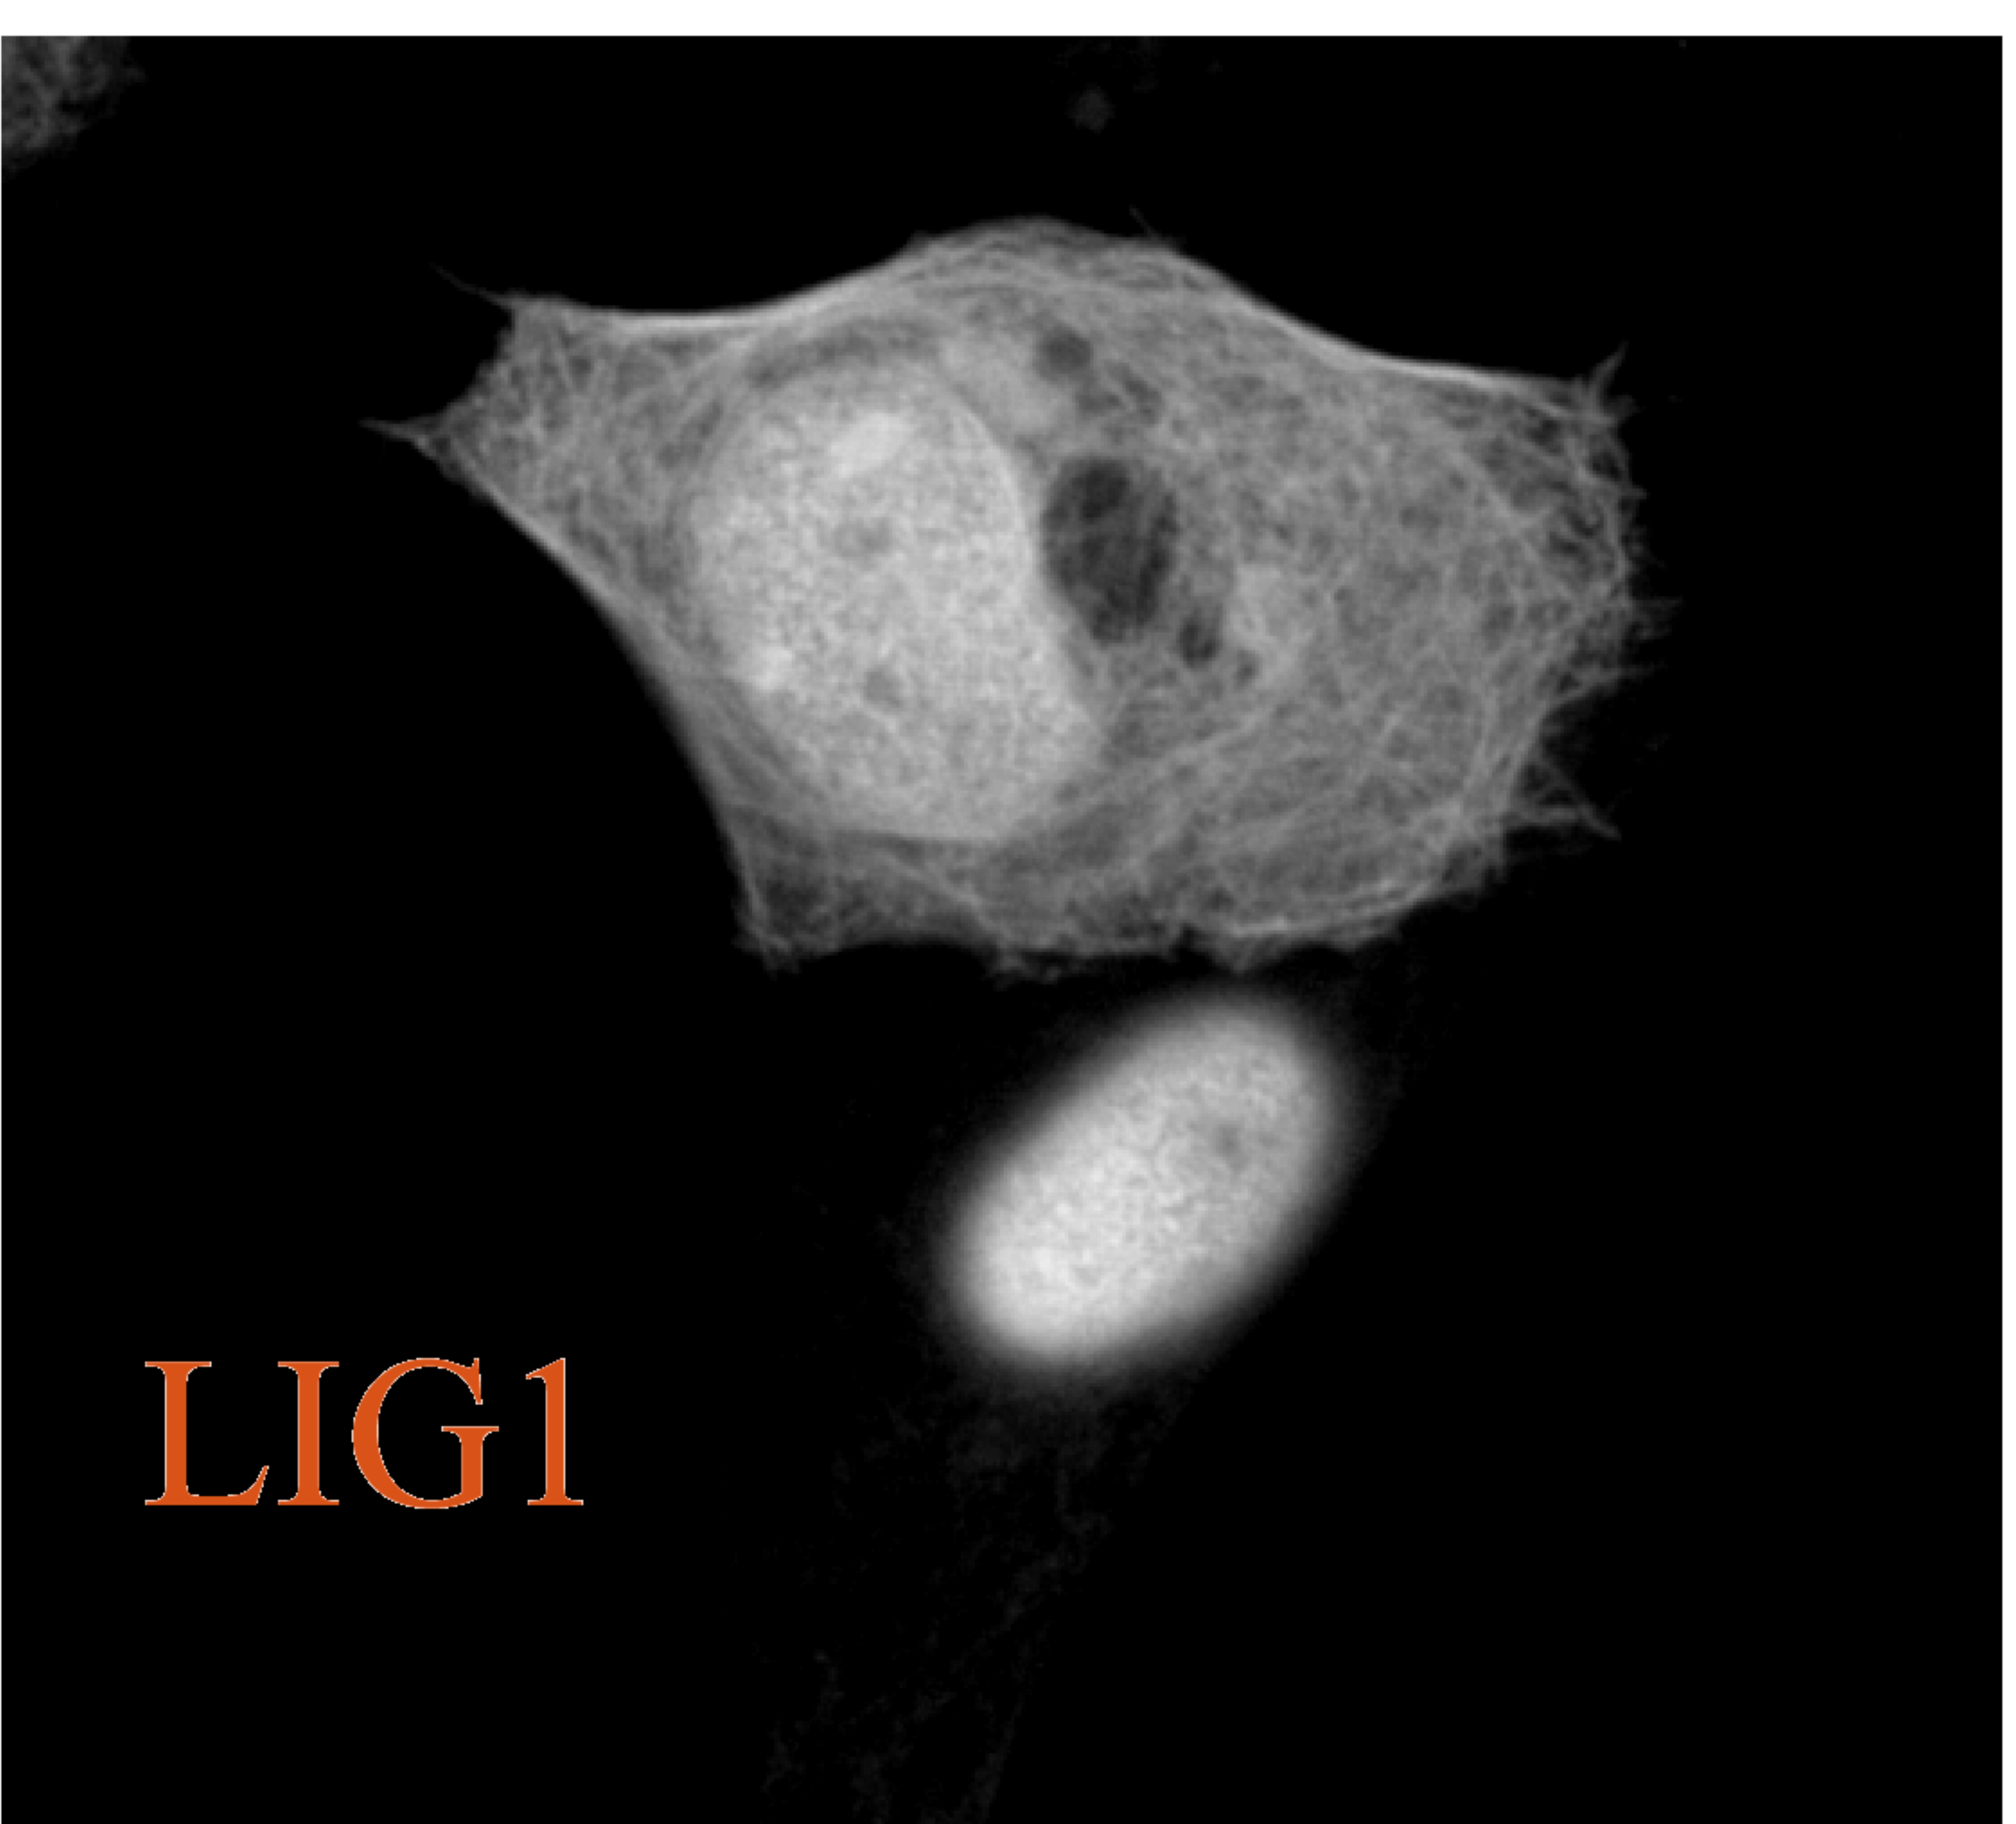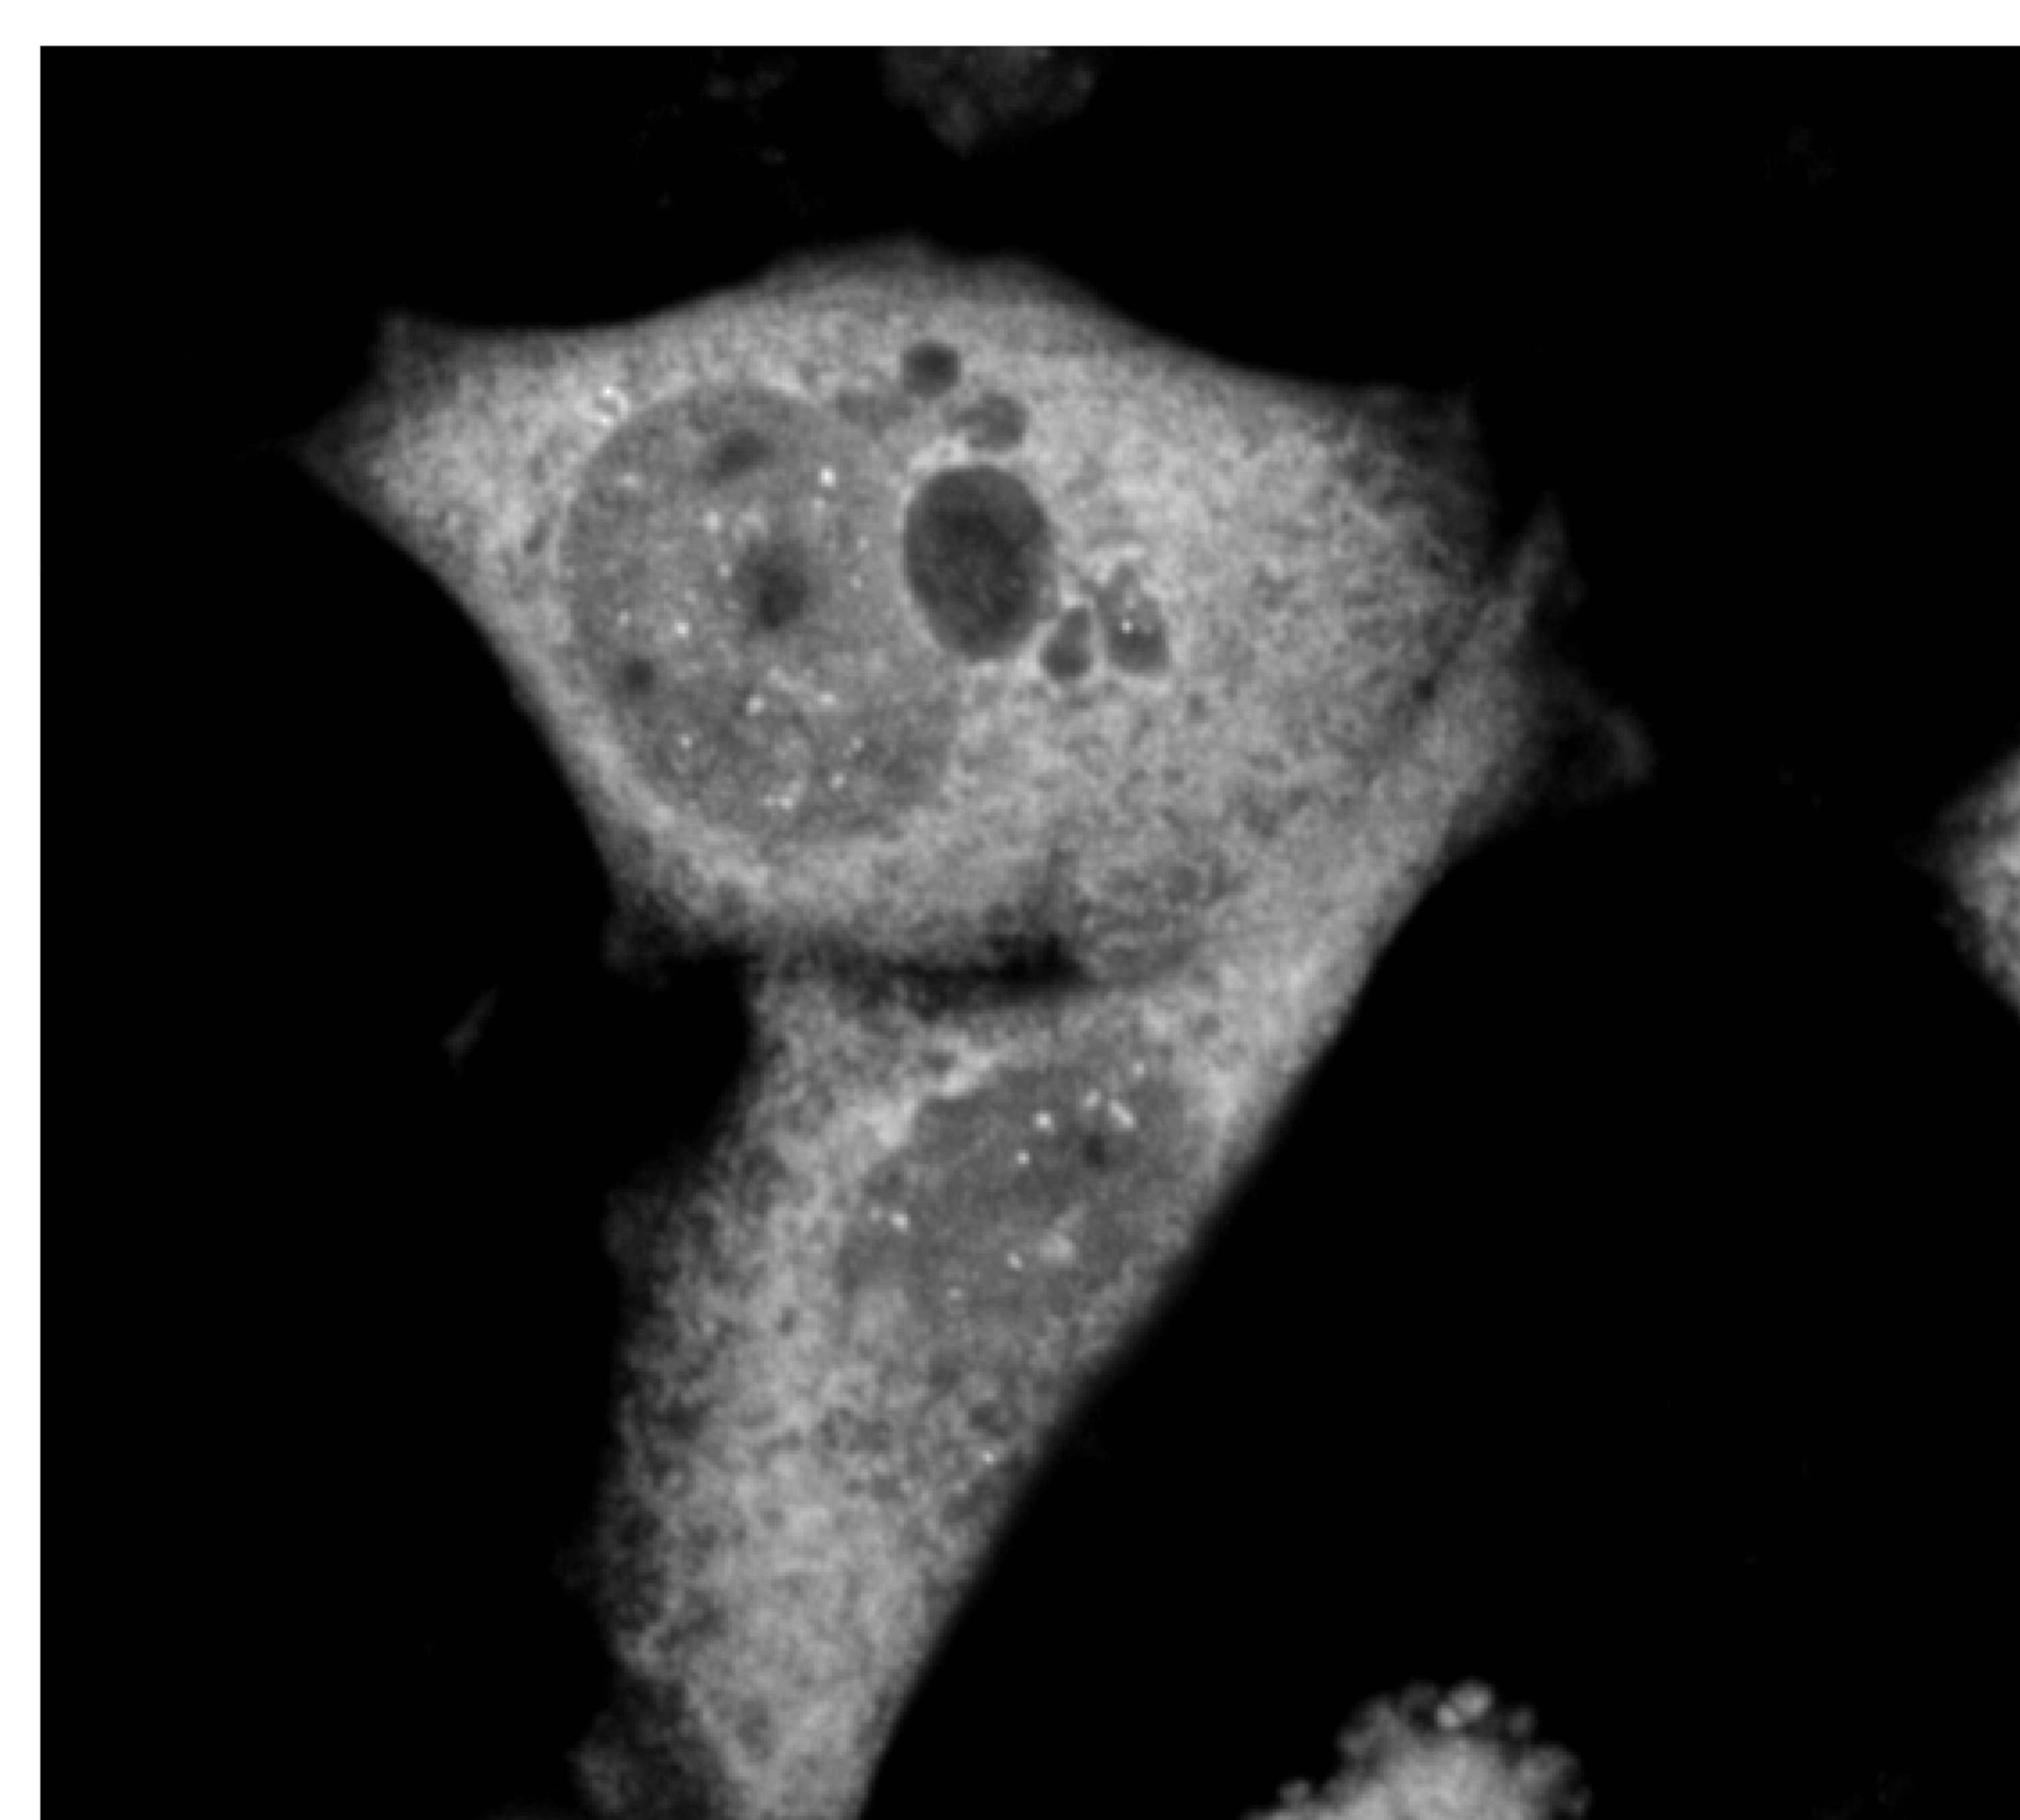**RNA-binding protein**

Bait

mRNA

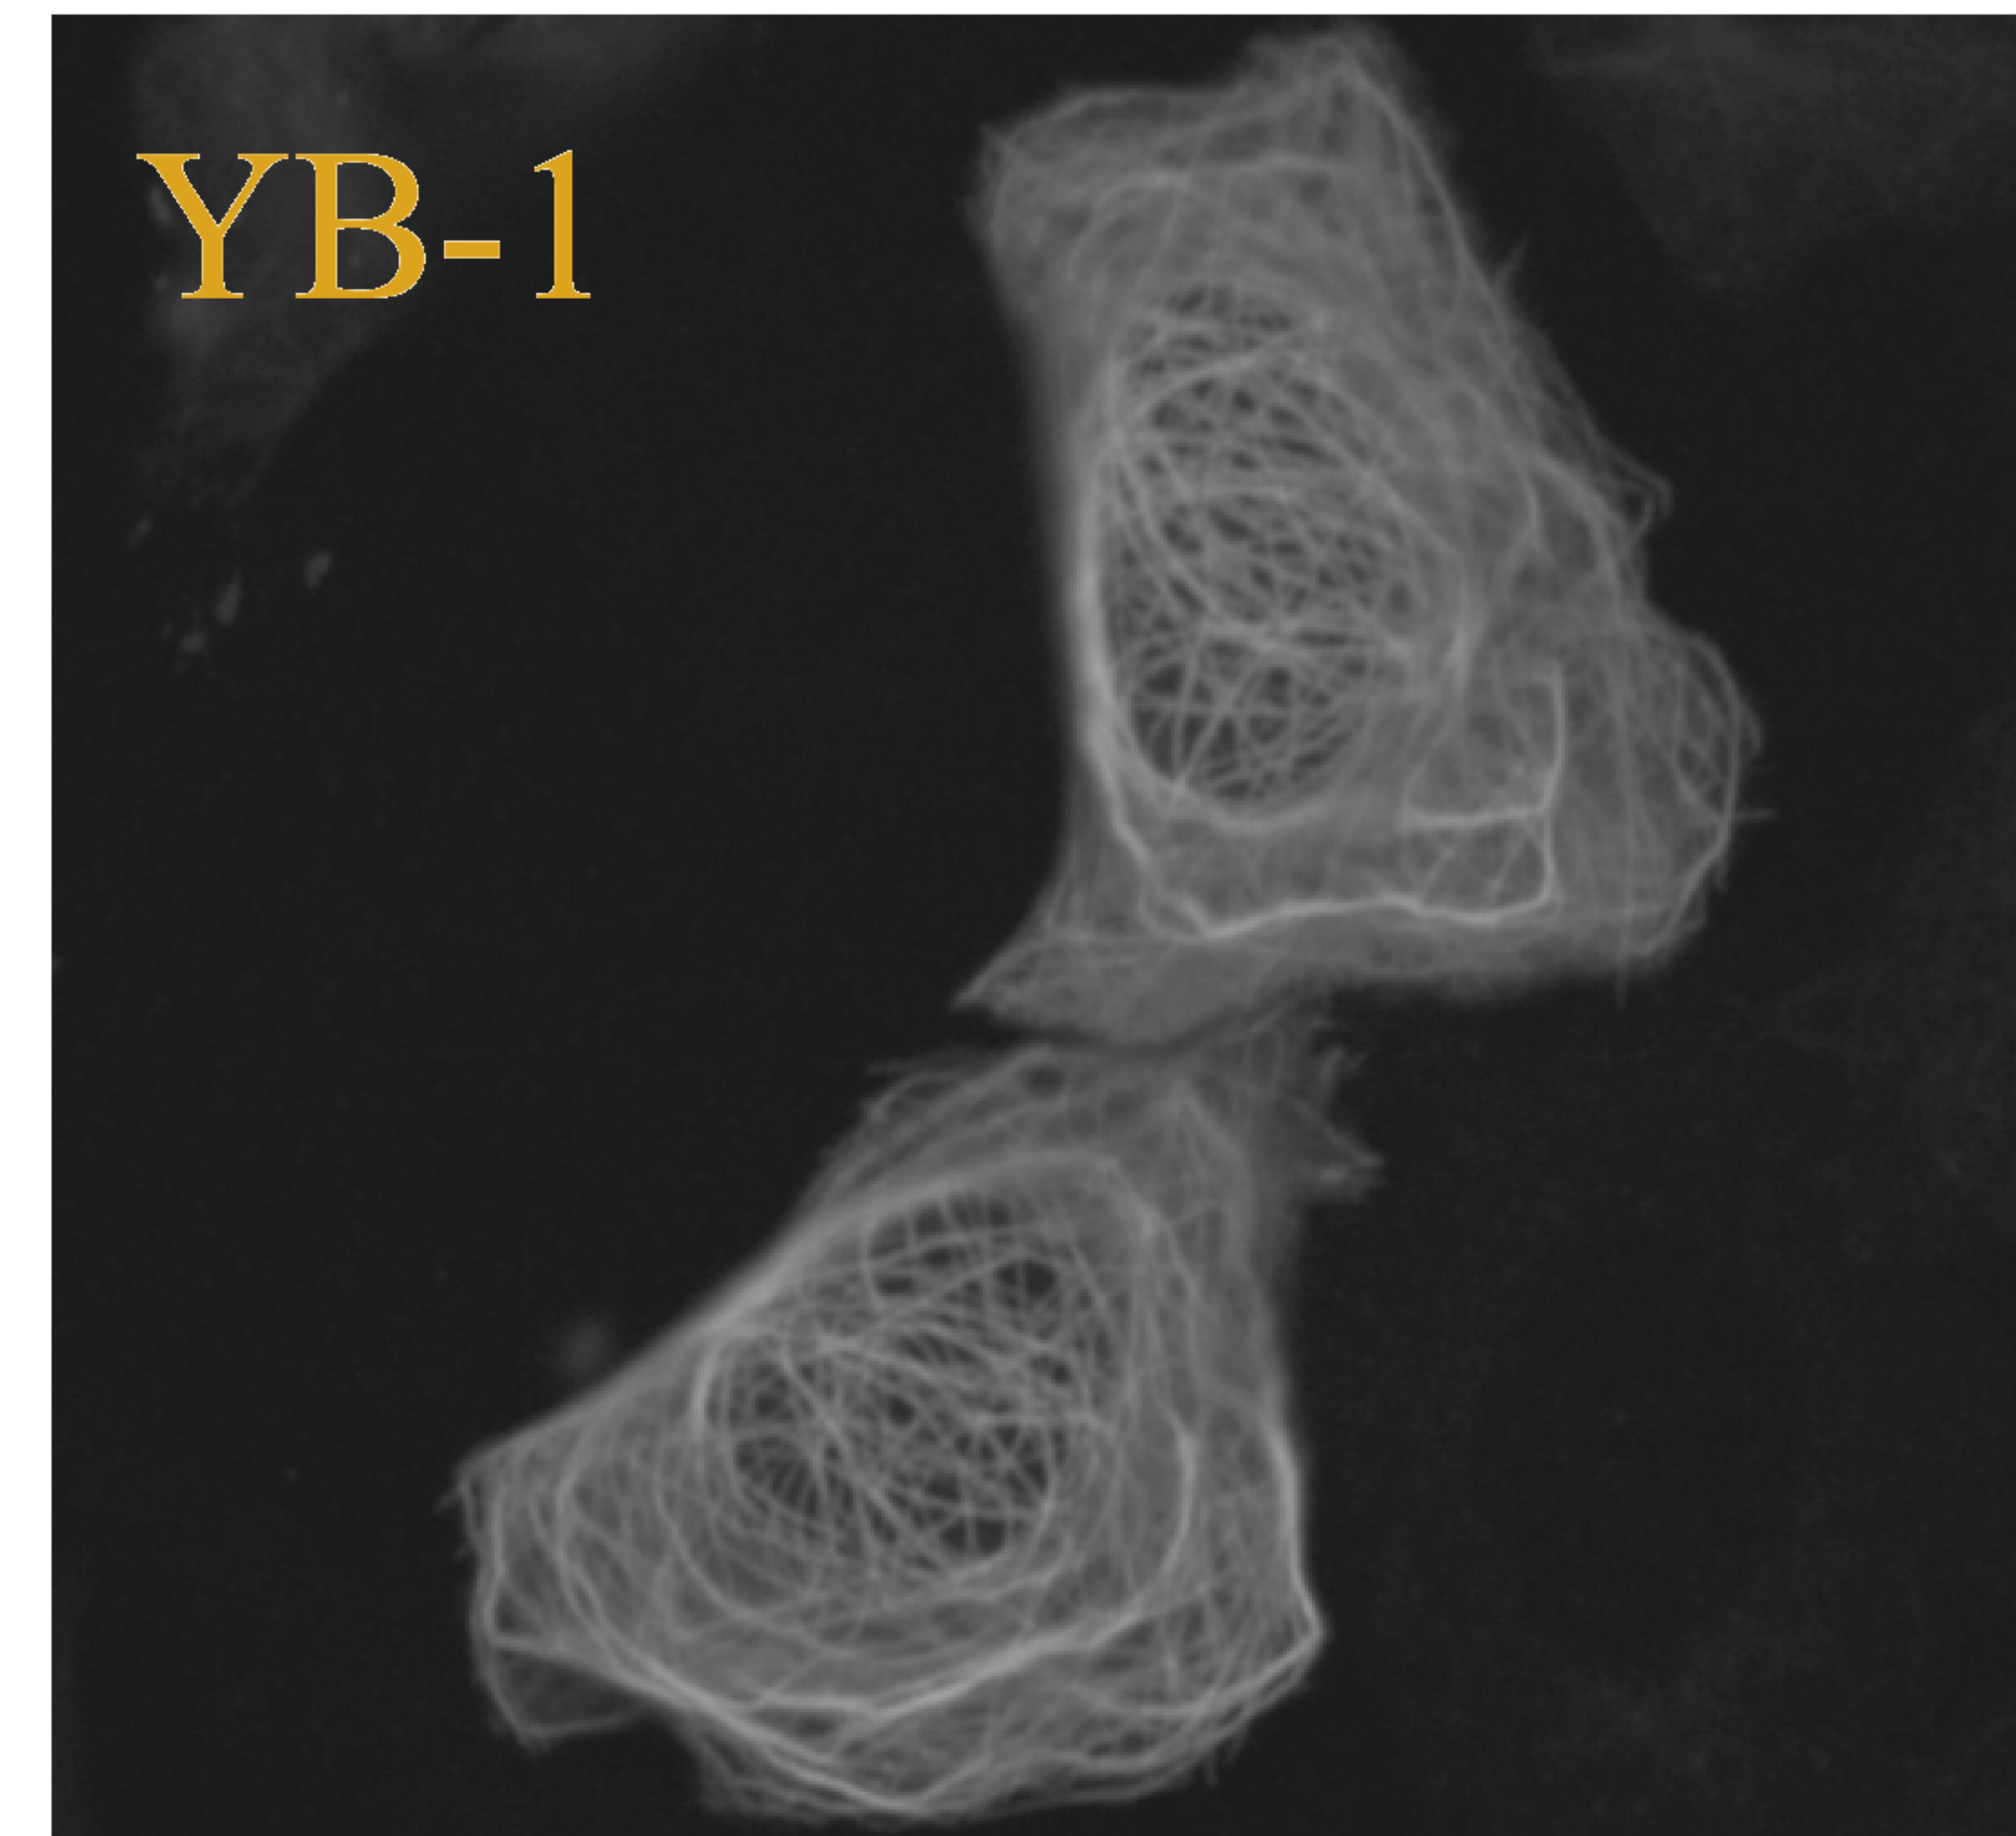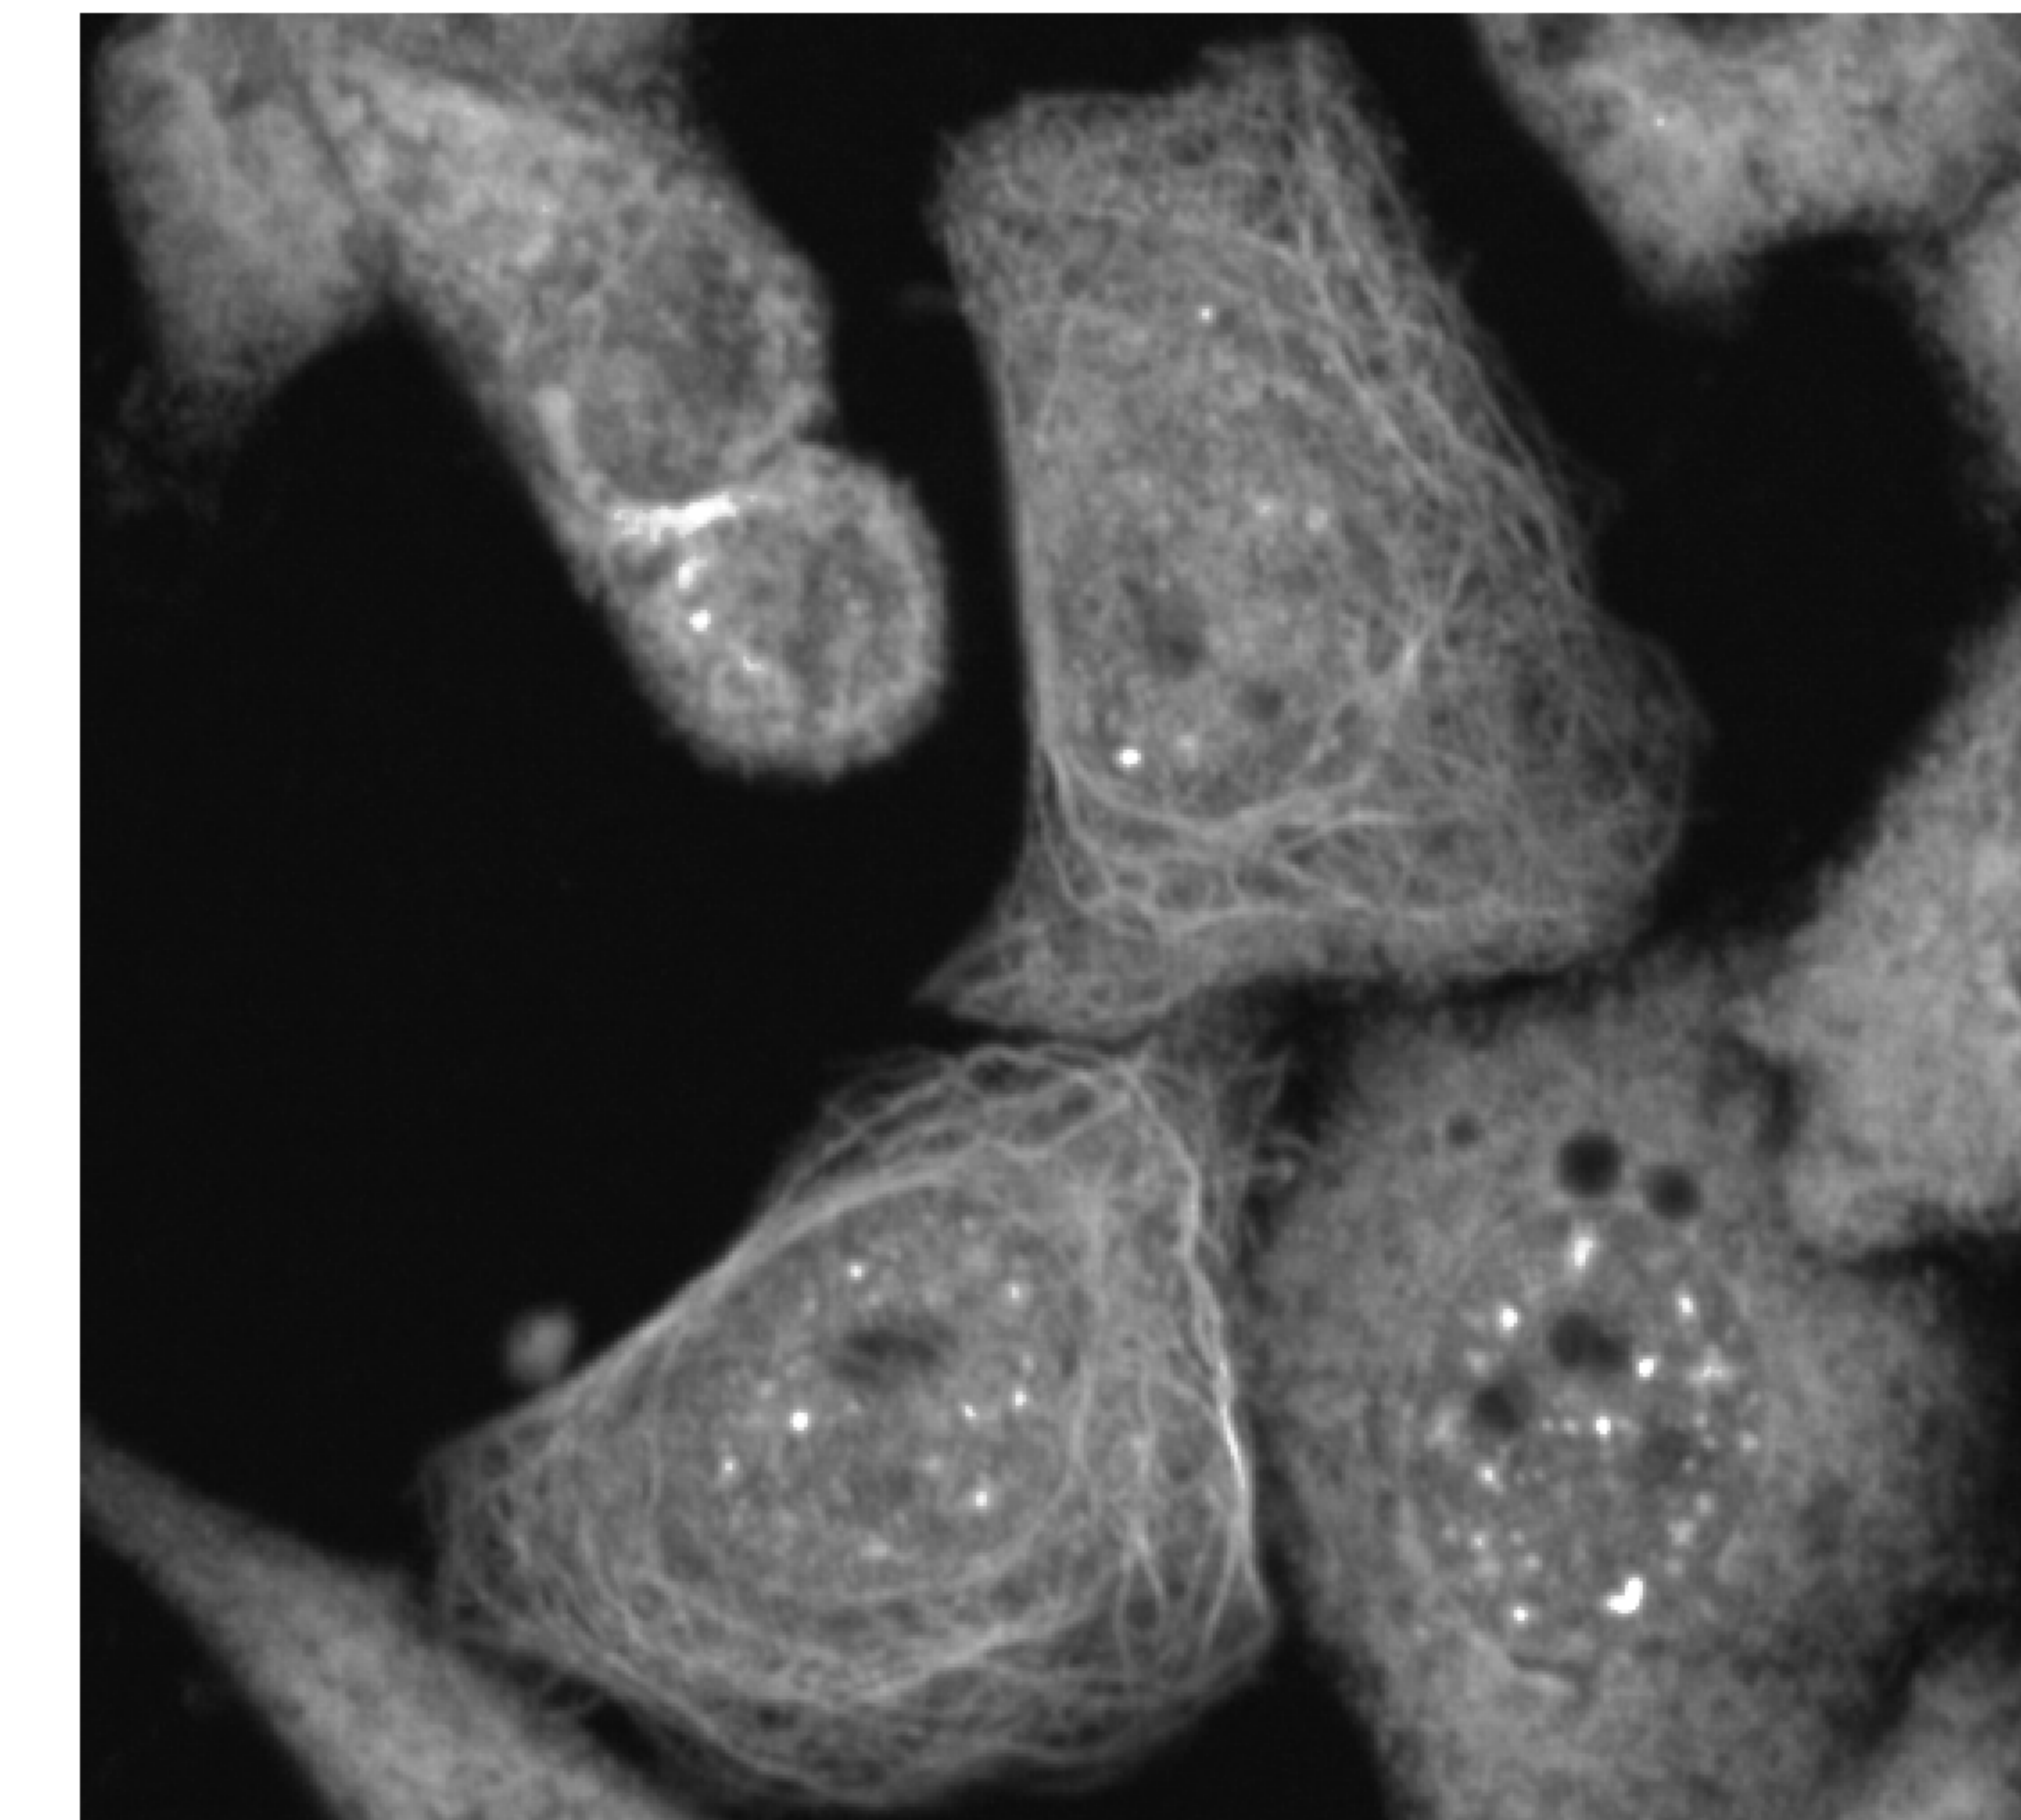**b**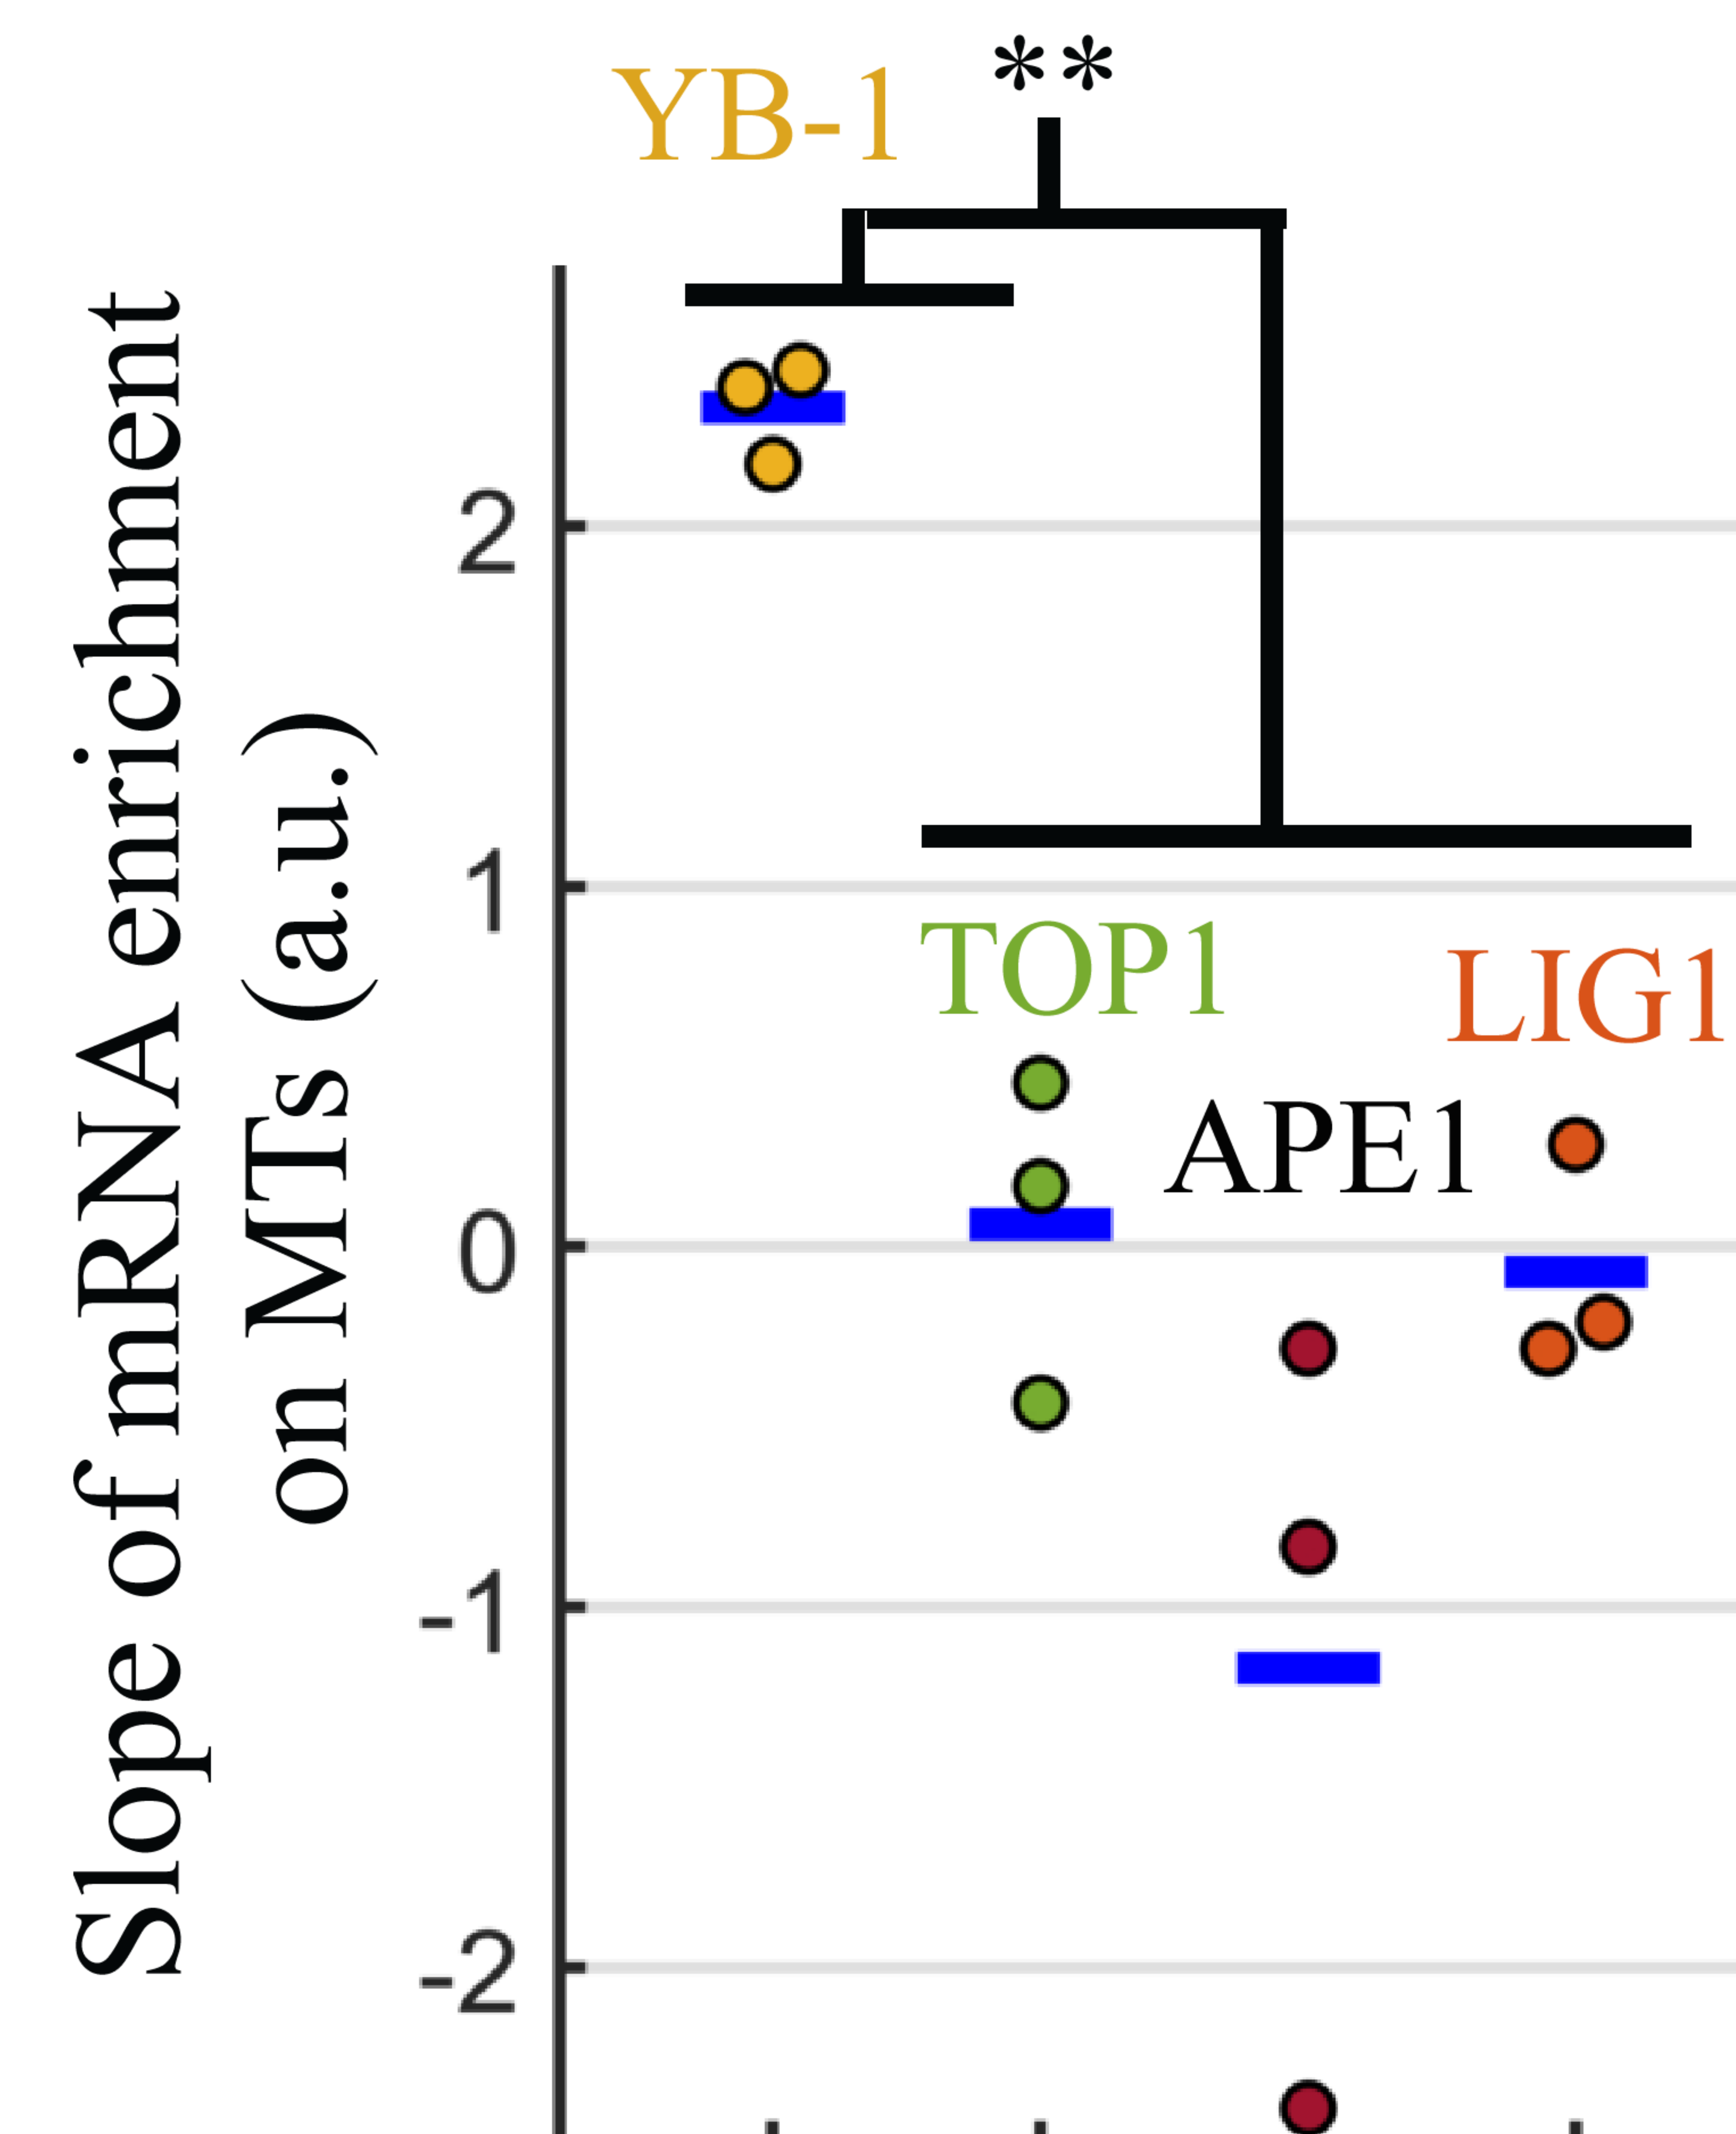

Supplement: supp [file elife-80387-supp-v1.zip › elife_poa_e80387_Figure_3_figure_supplement_3.pdf]

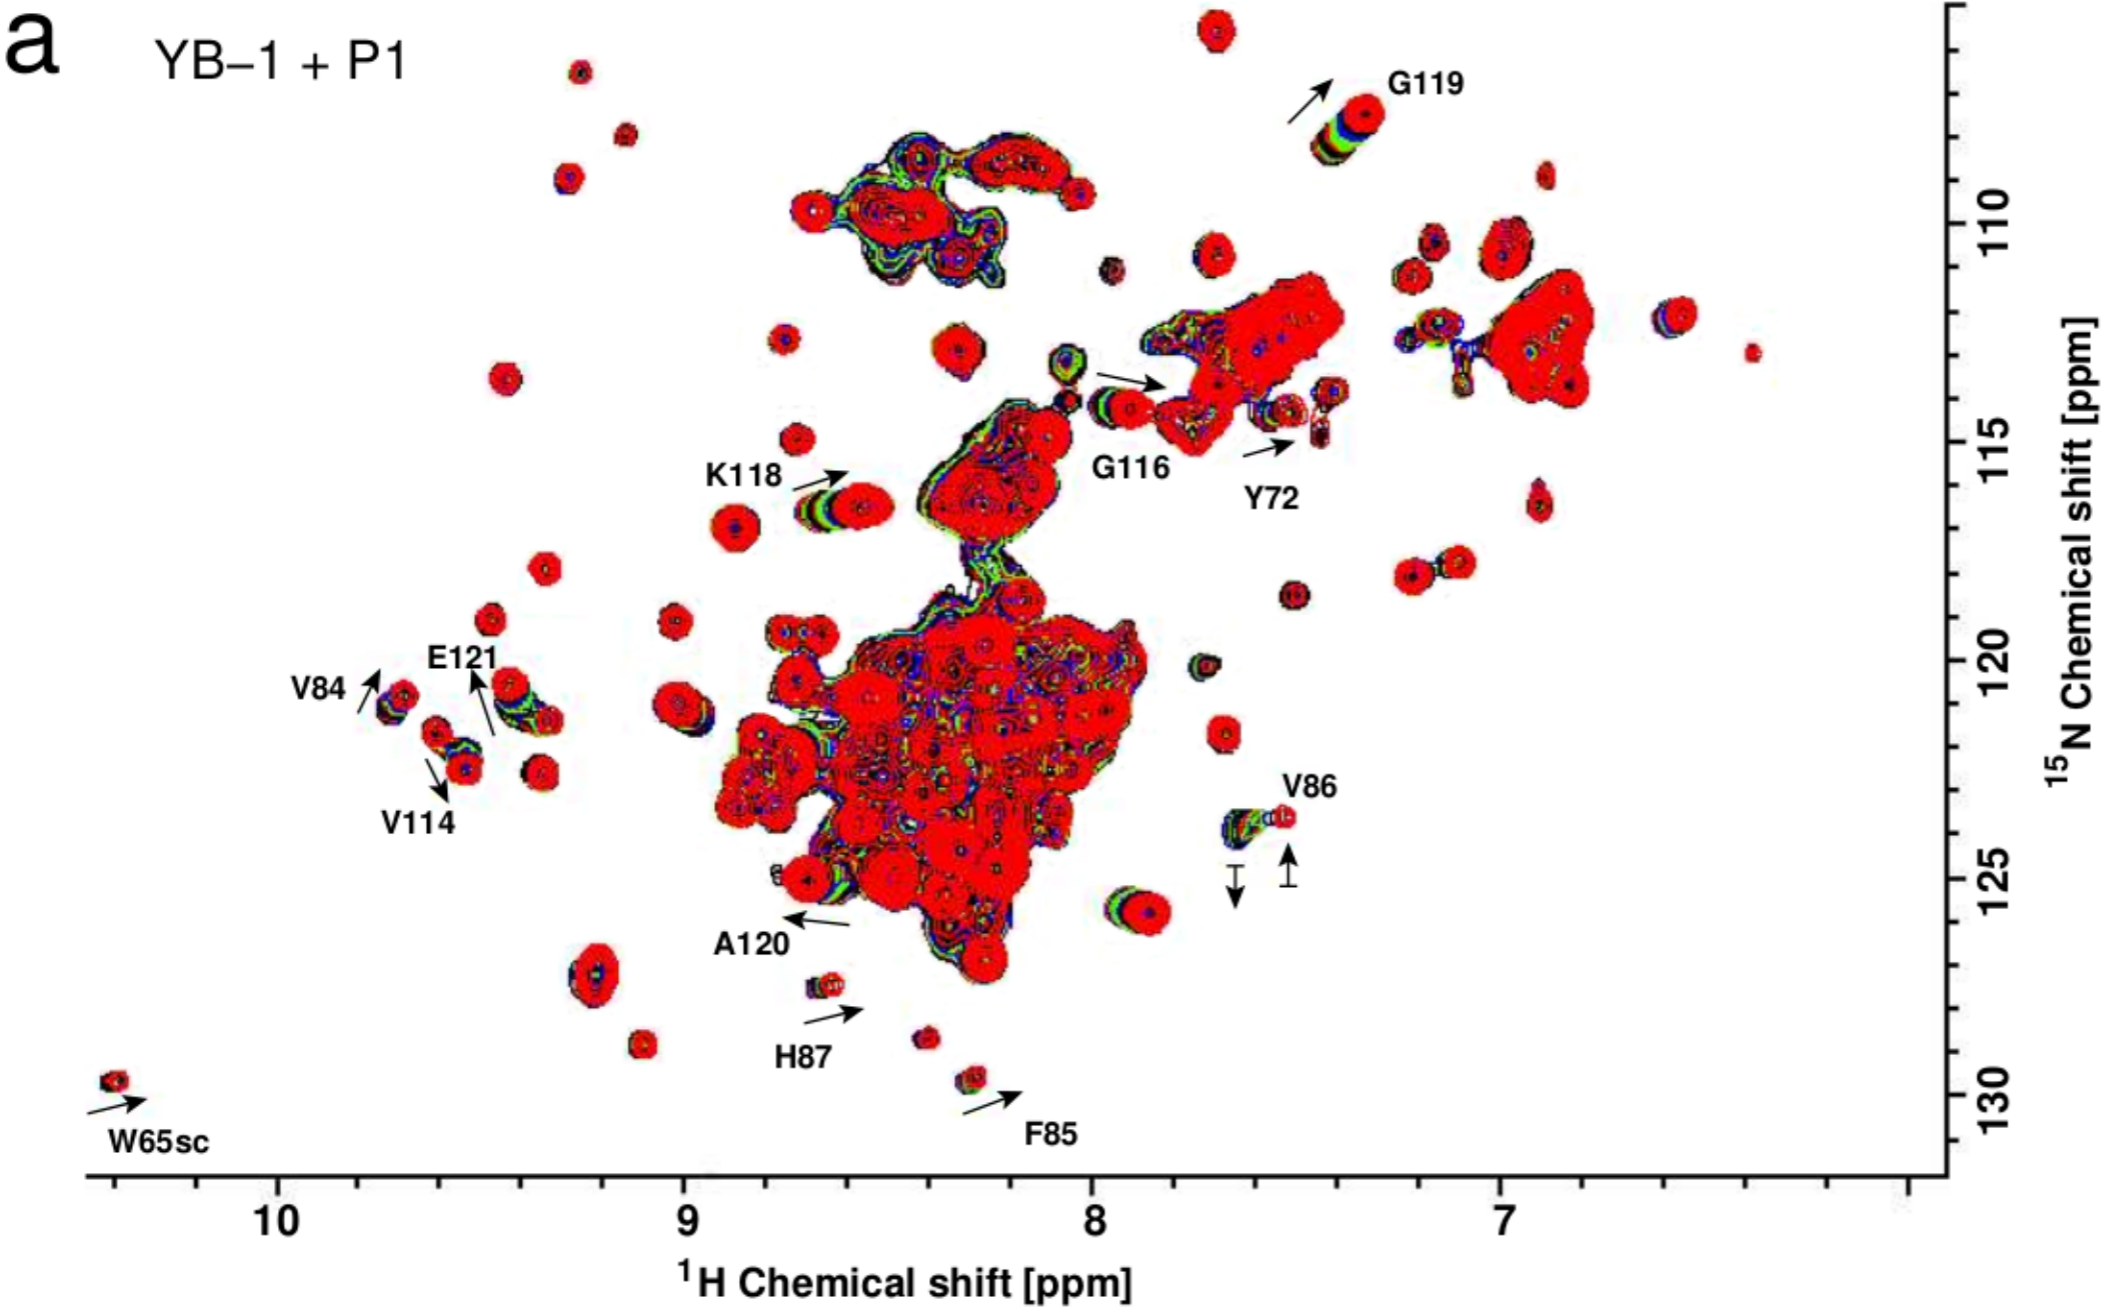

**b**

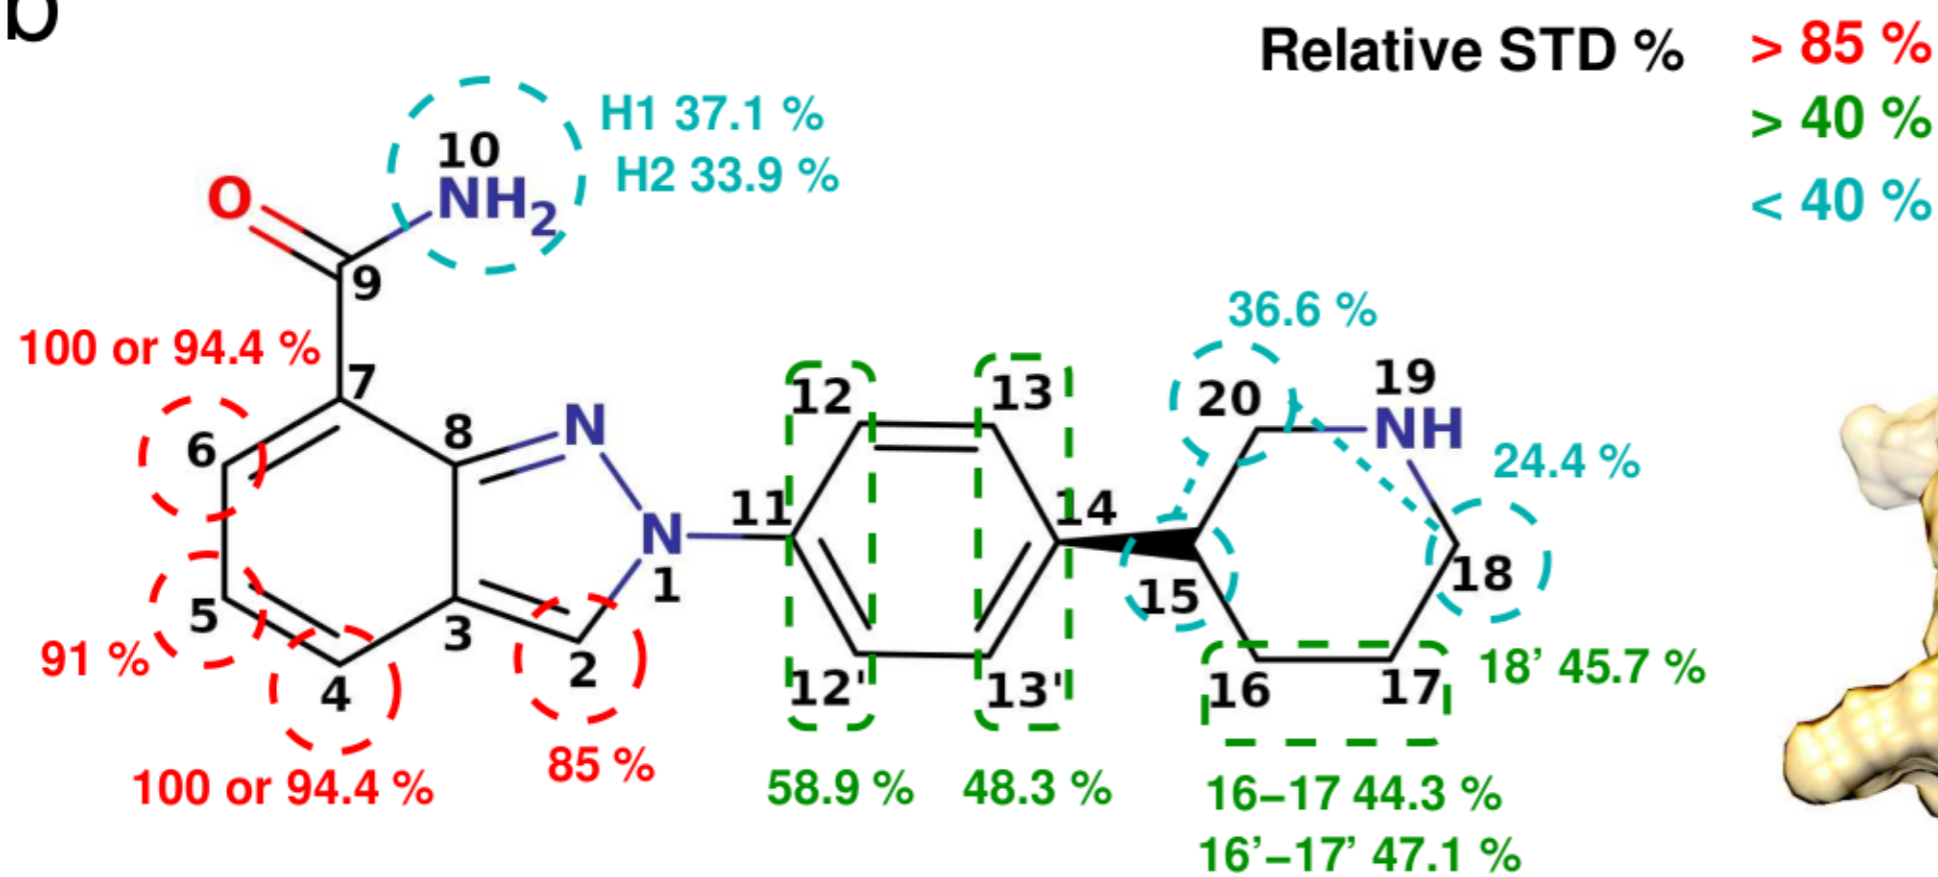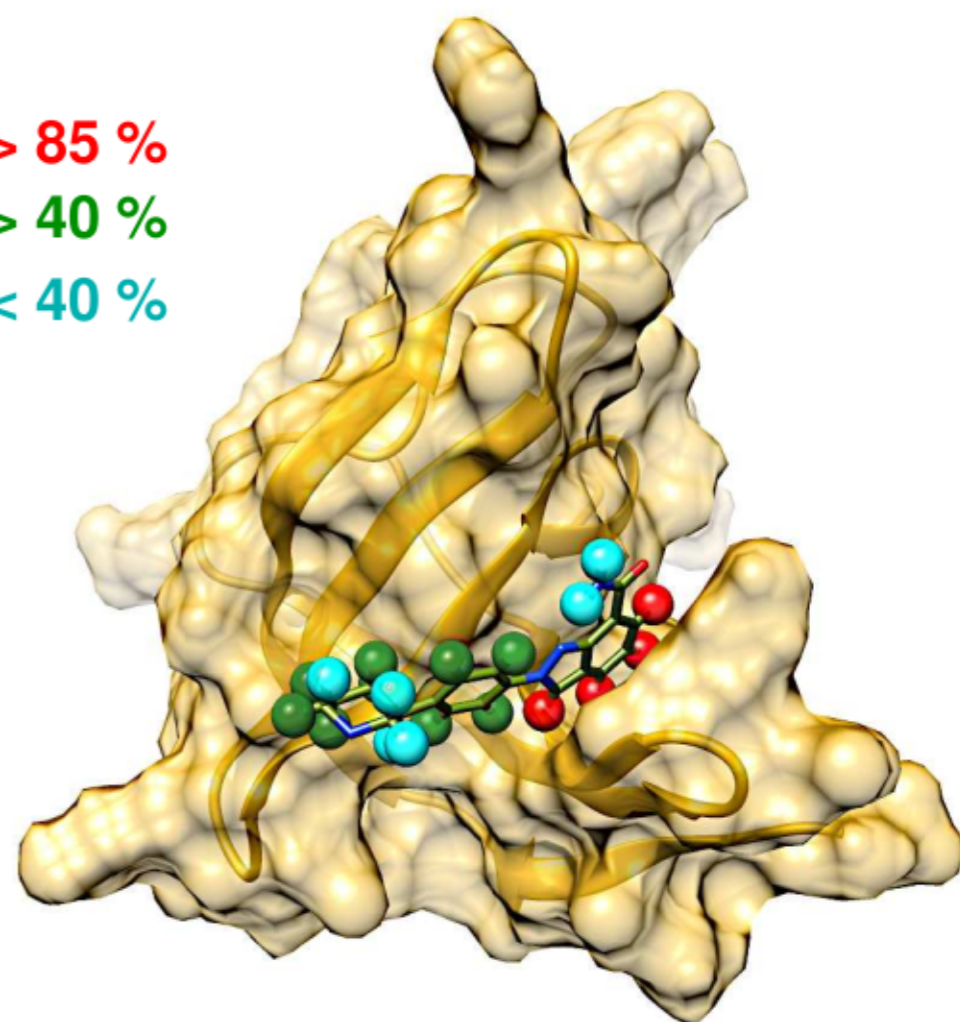

Supplement: supp [file elife-80387-supp-v1.zip › elife_poa_e80387_Figure_6_figure_supplement_1.pdf]

a

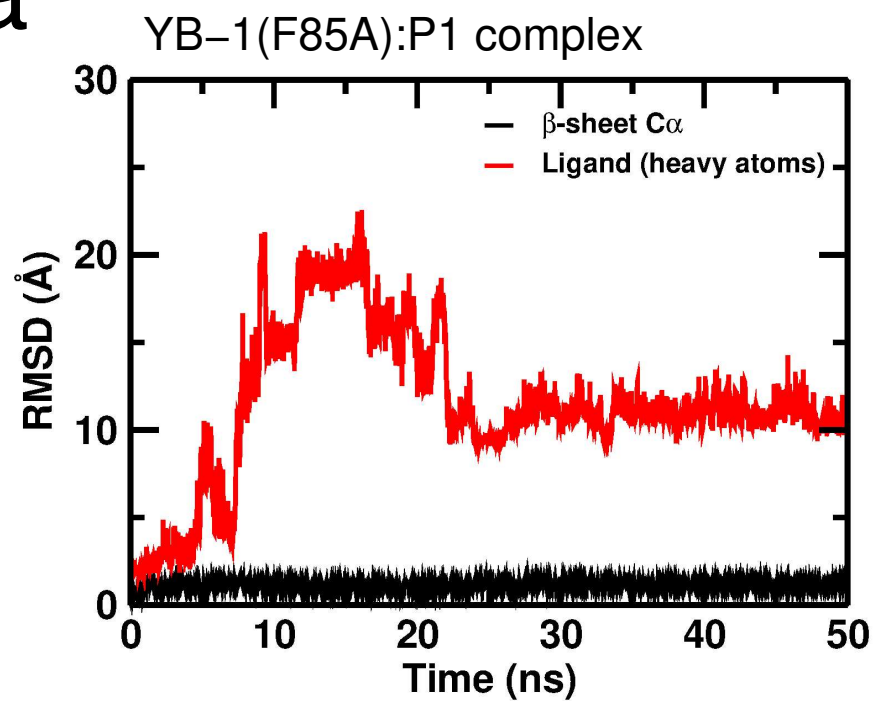

b

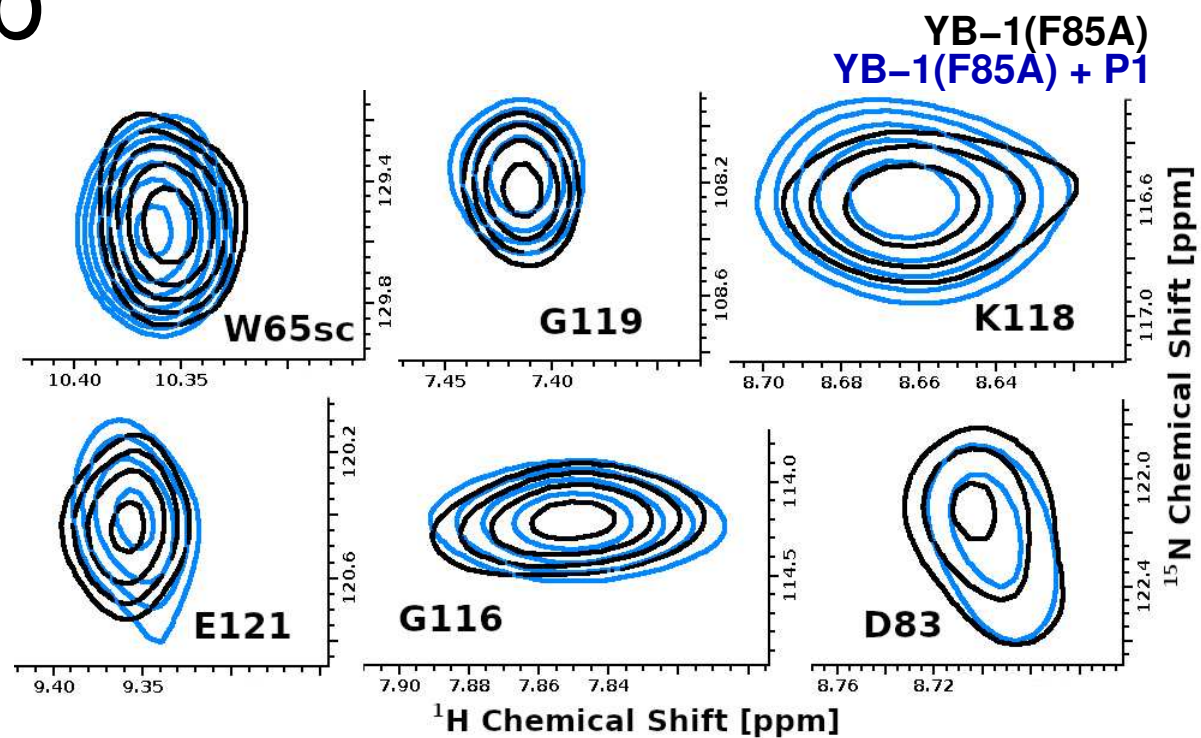

c

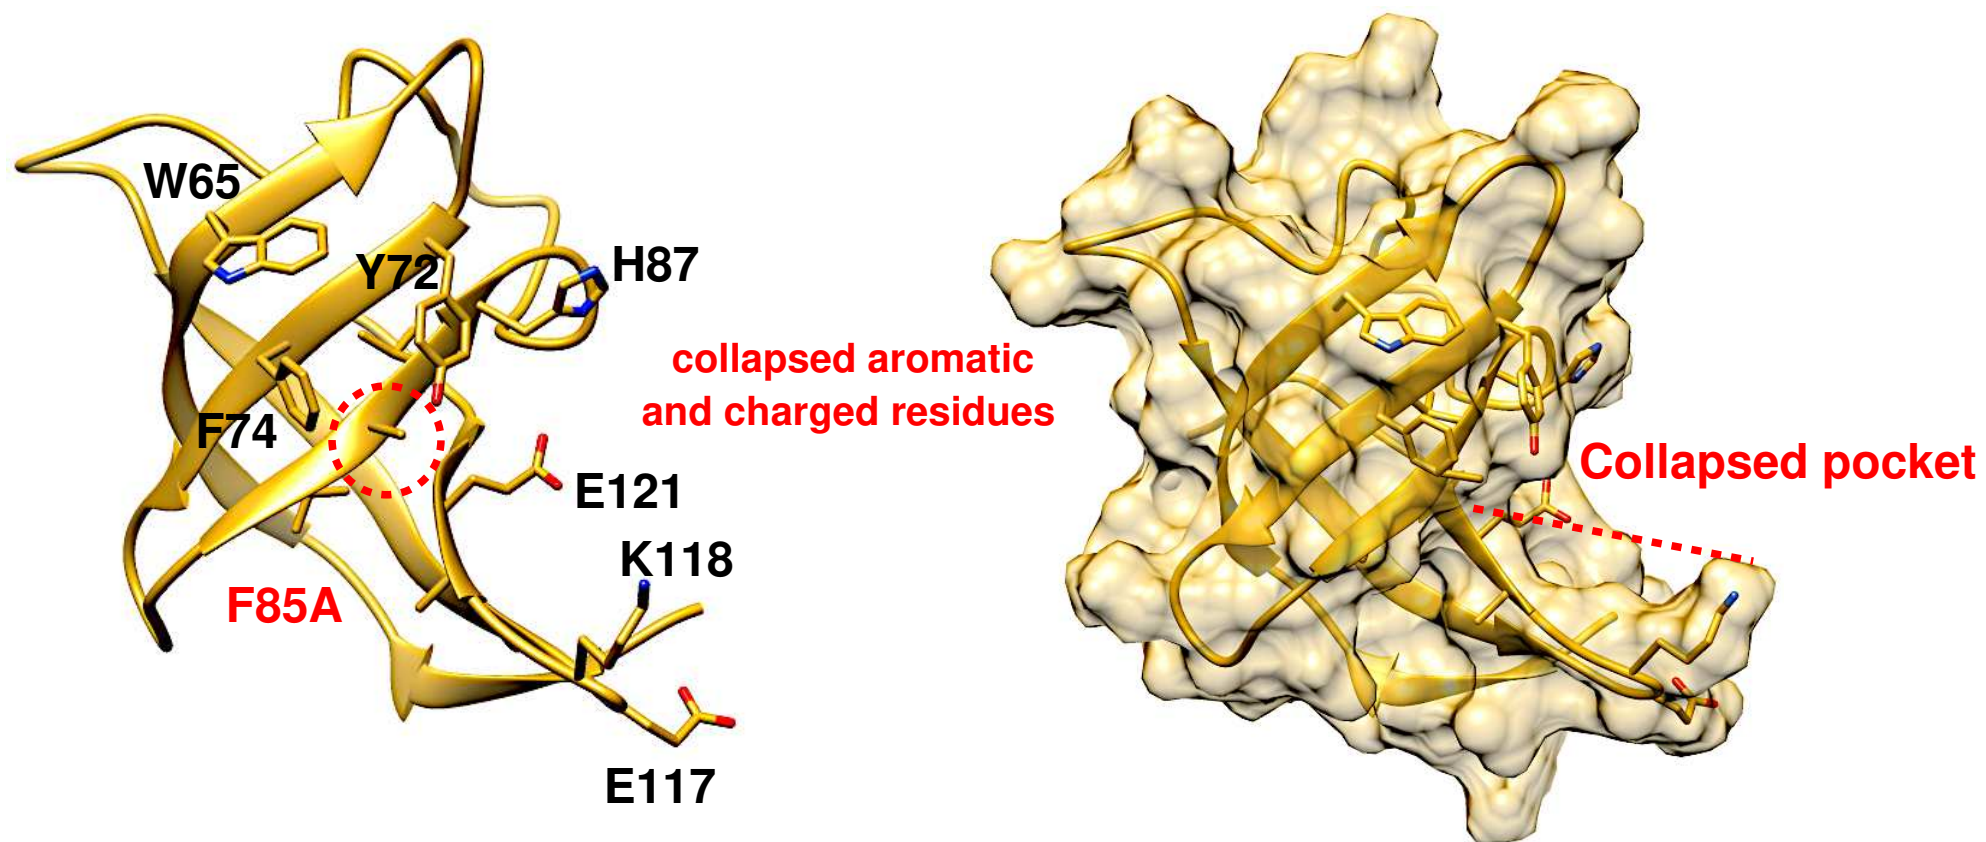

Supplement: supp [file elife-80387-supp-v1.zip › elife_poa_e80387_Figure_6_figure_supplement_2.pdf]

# YB1 + Ligand

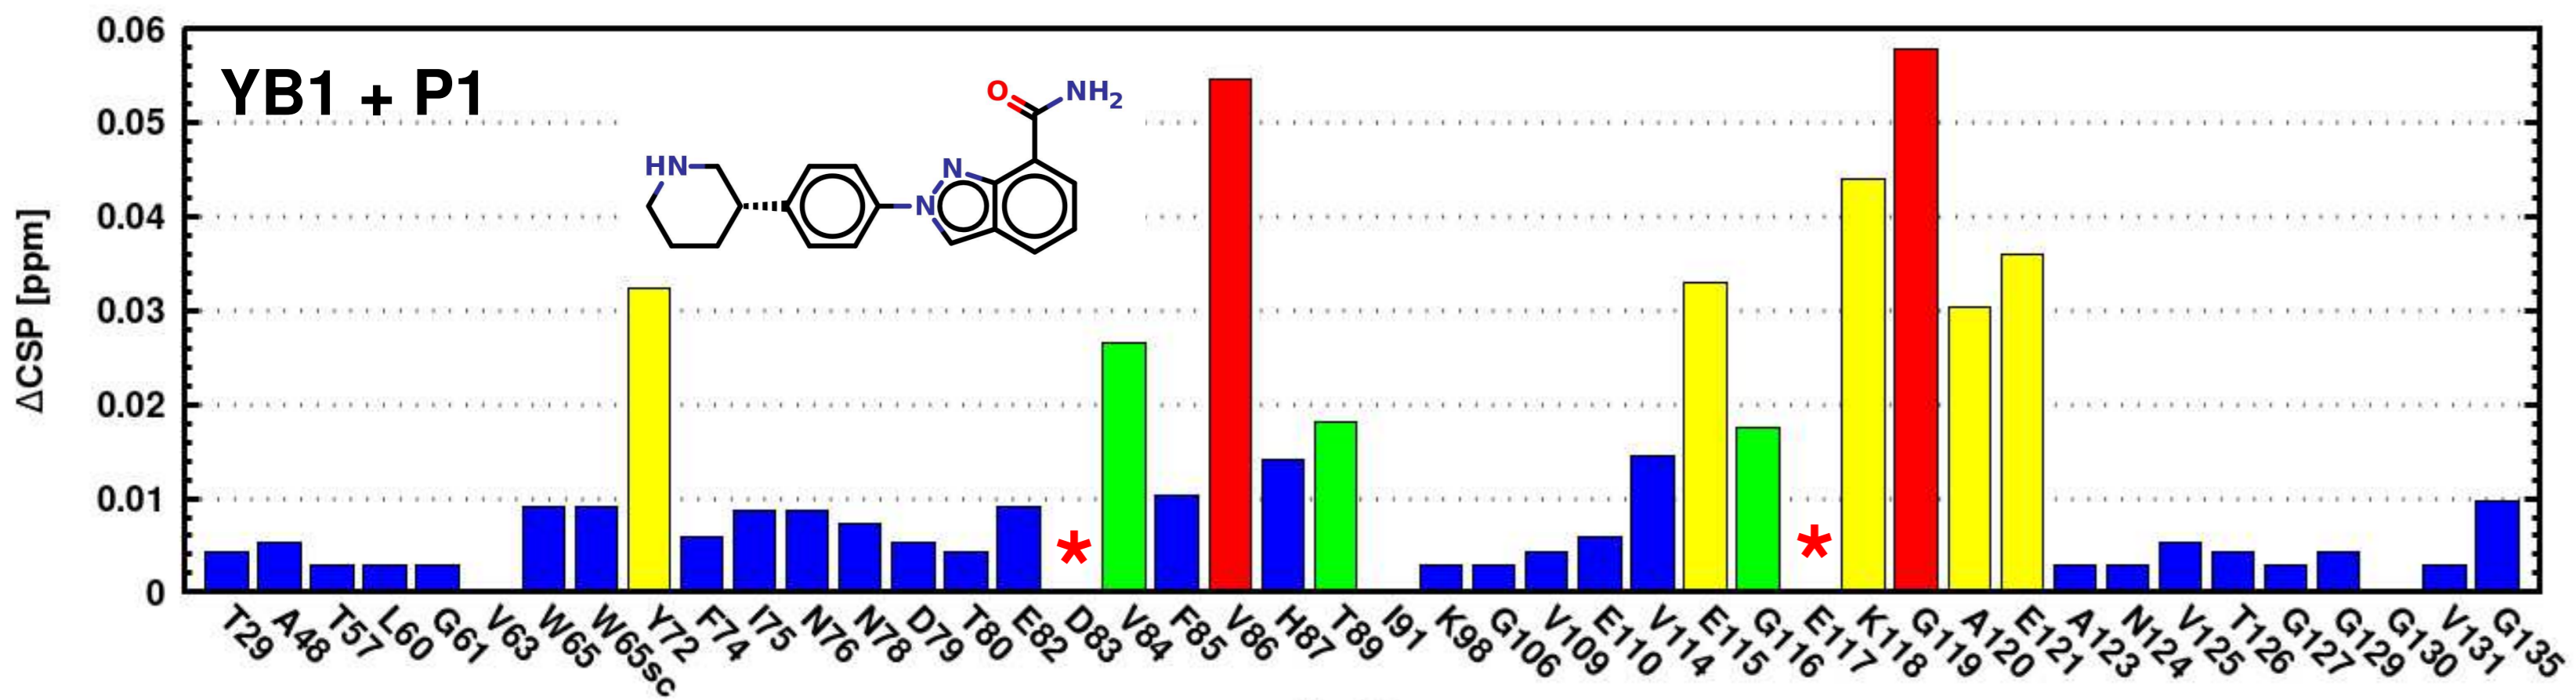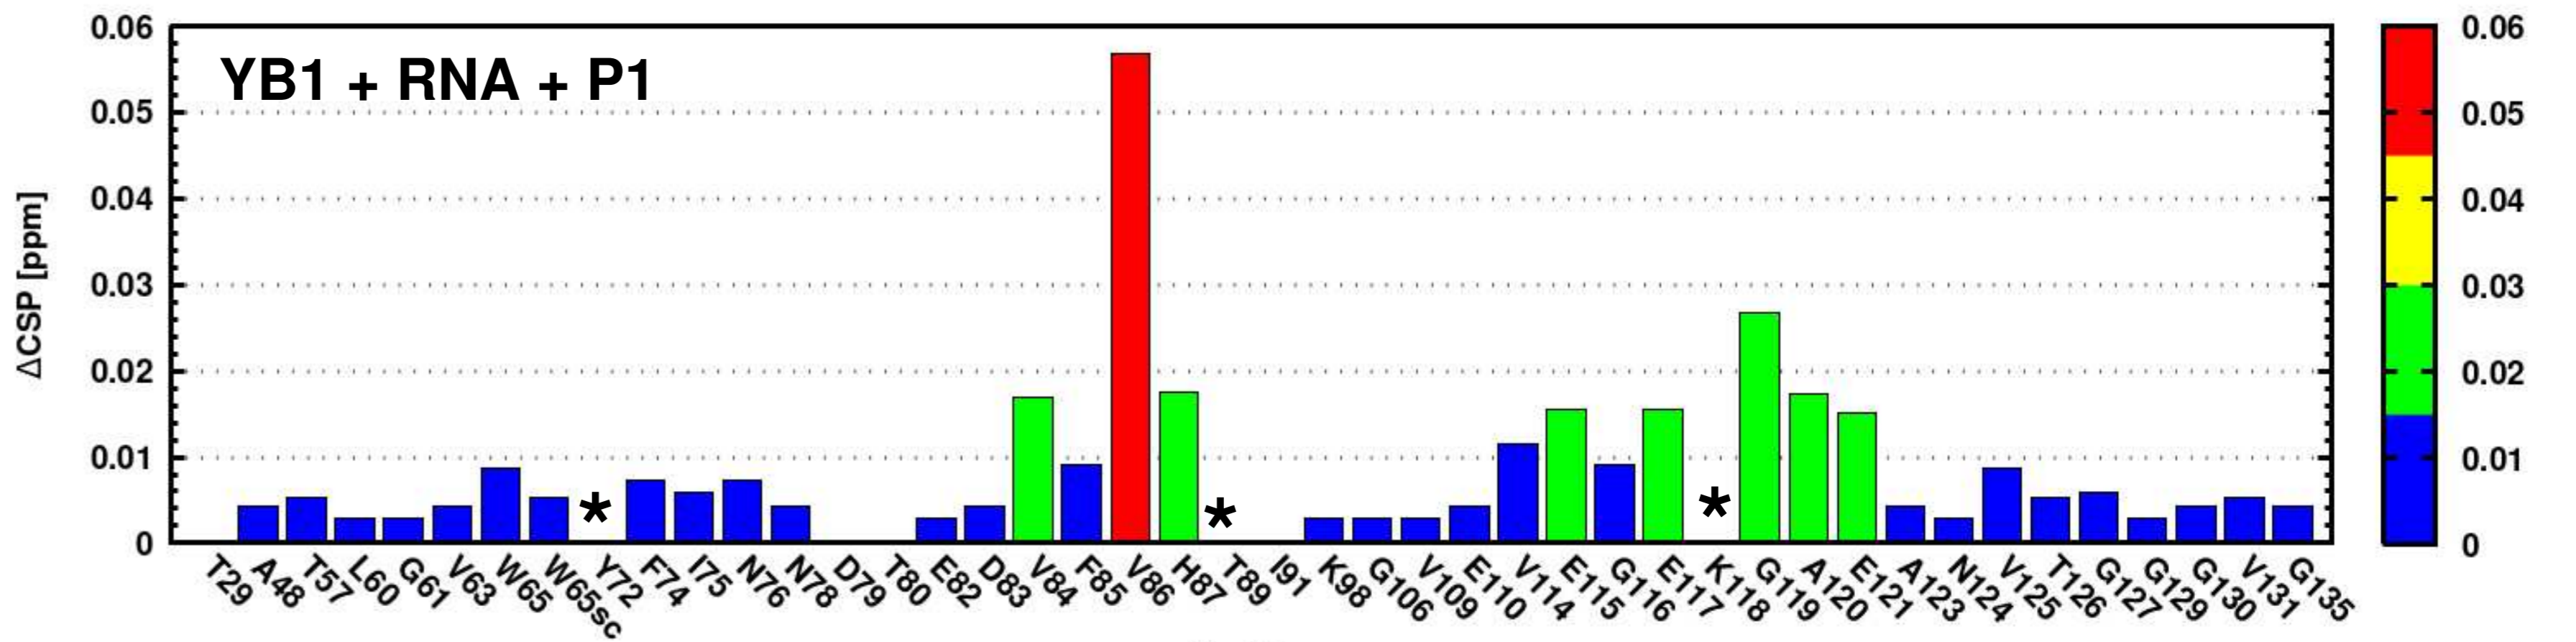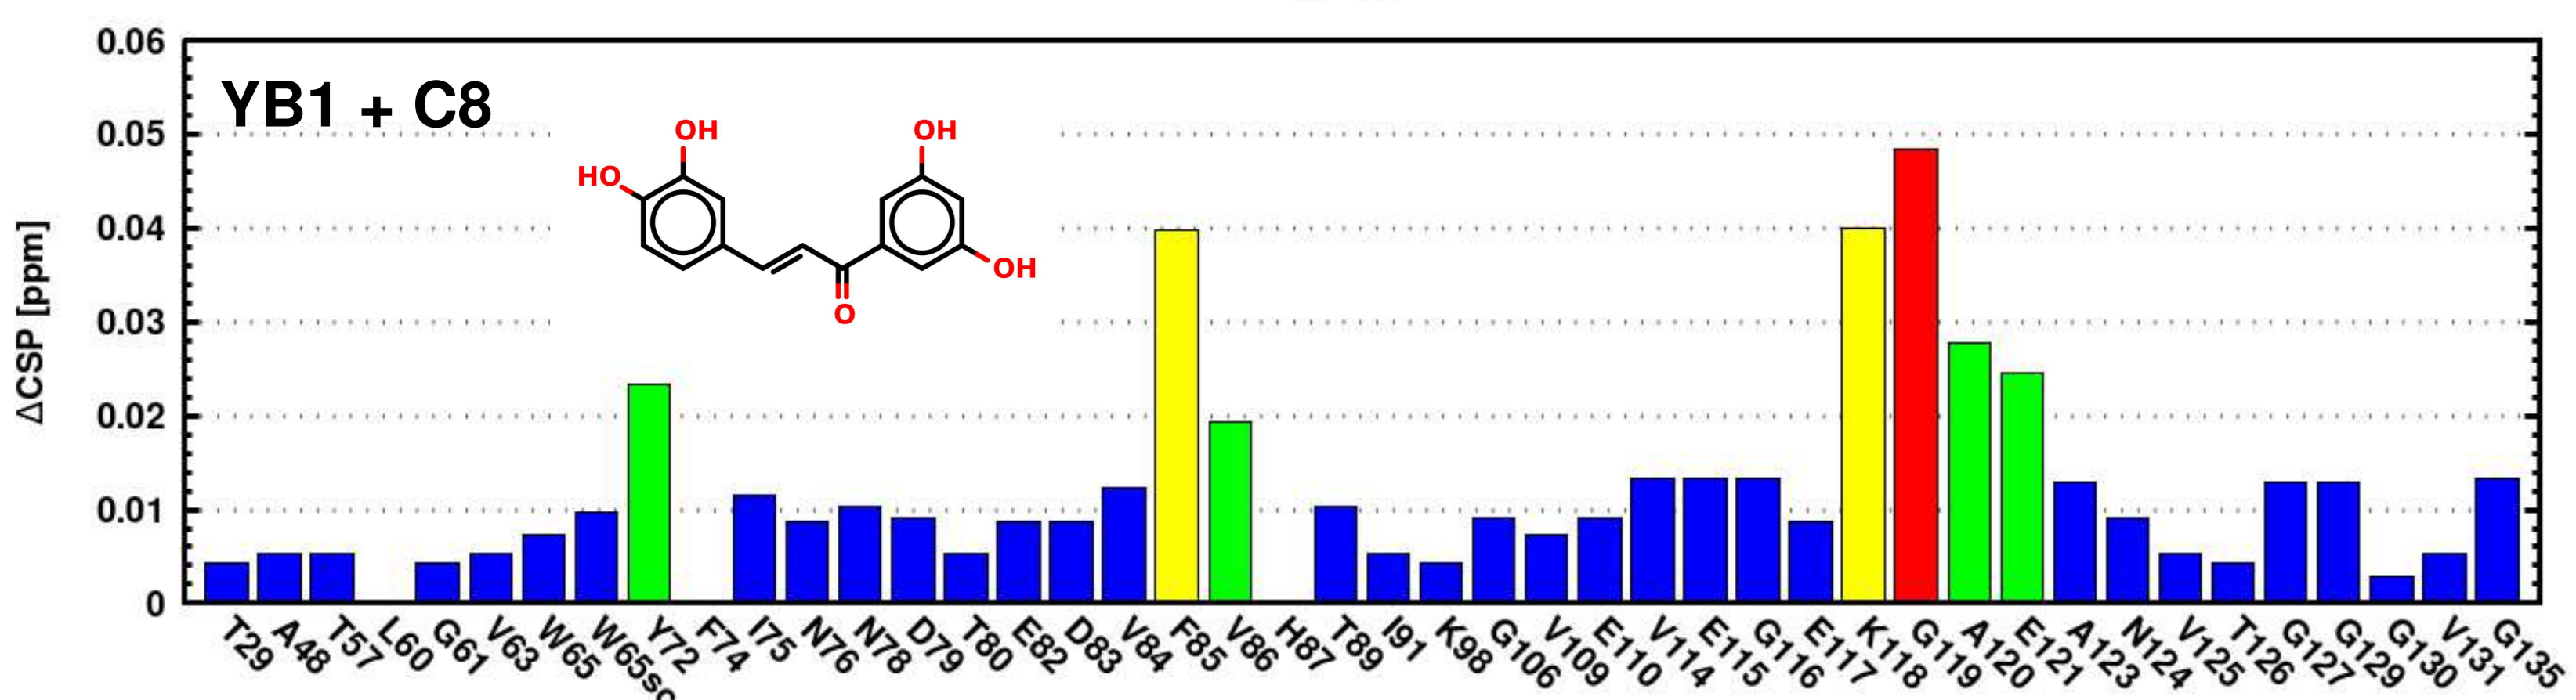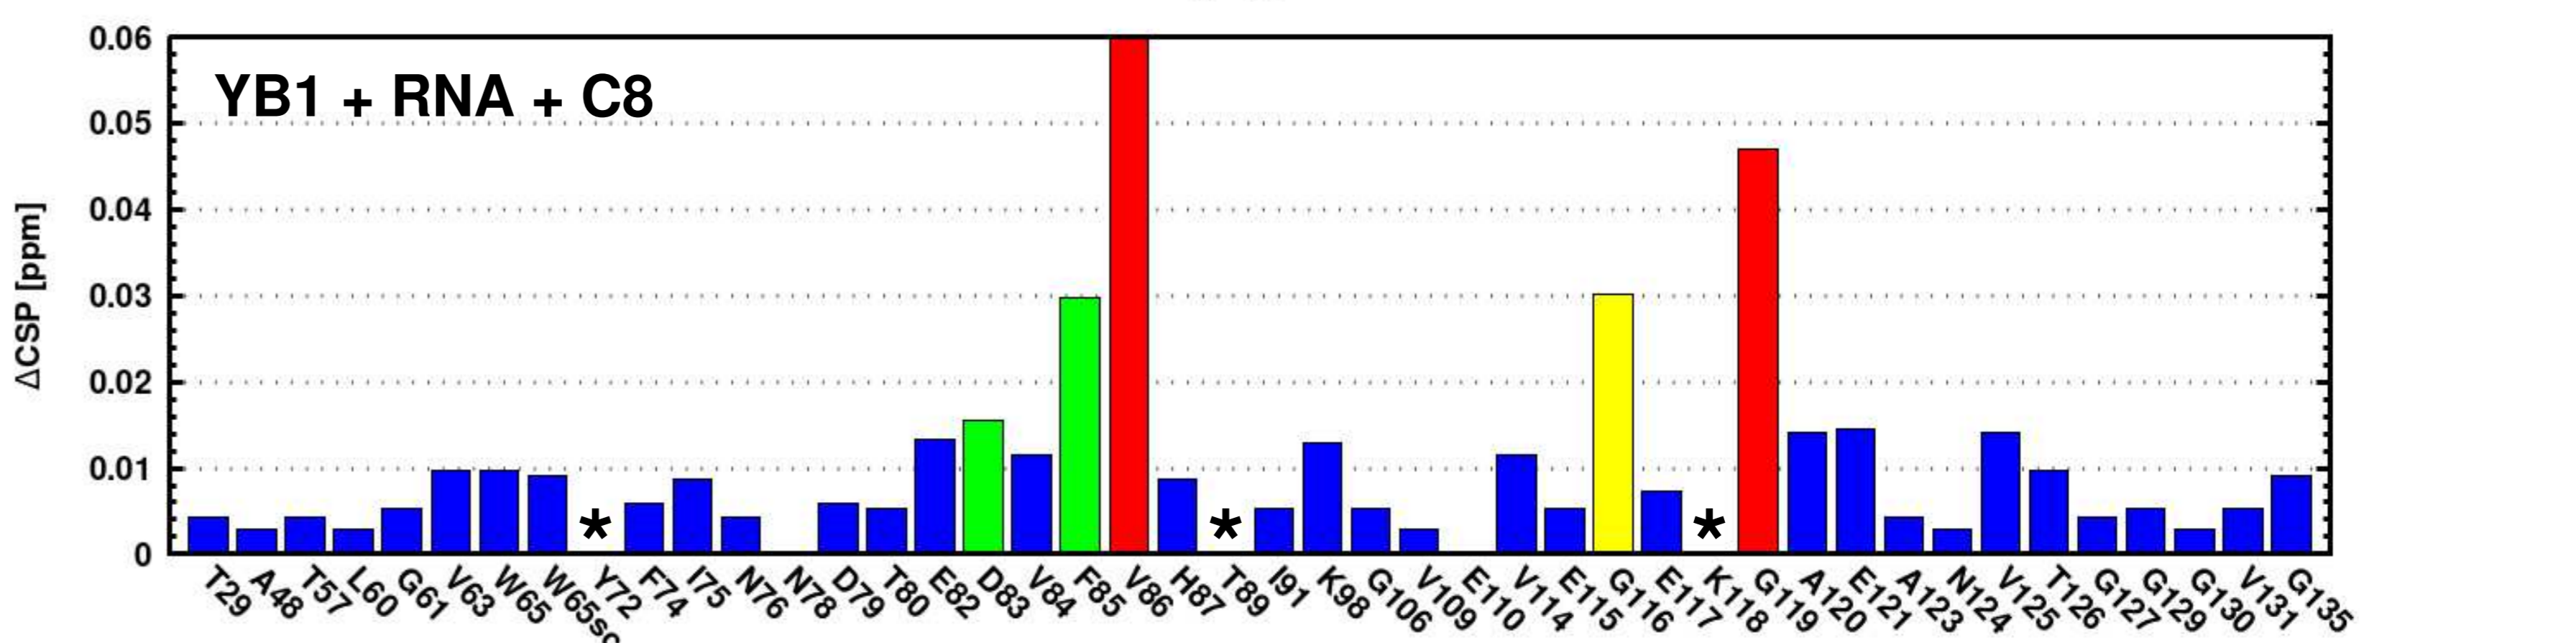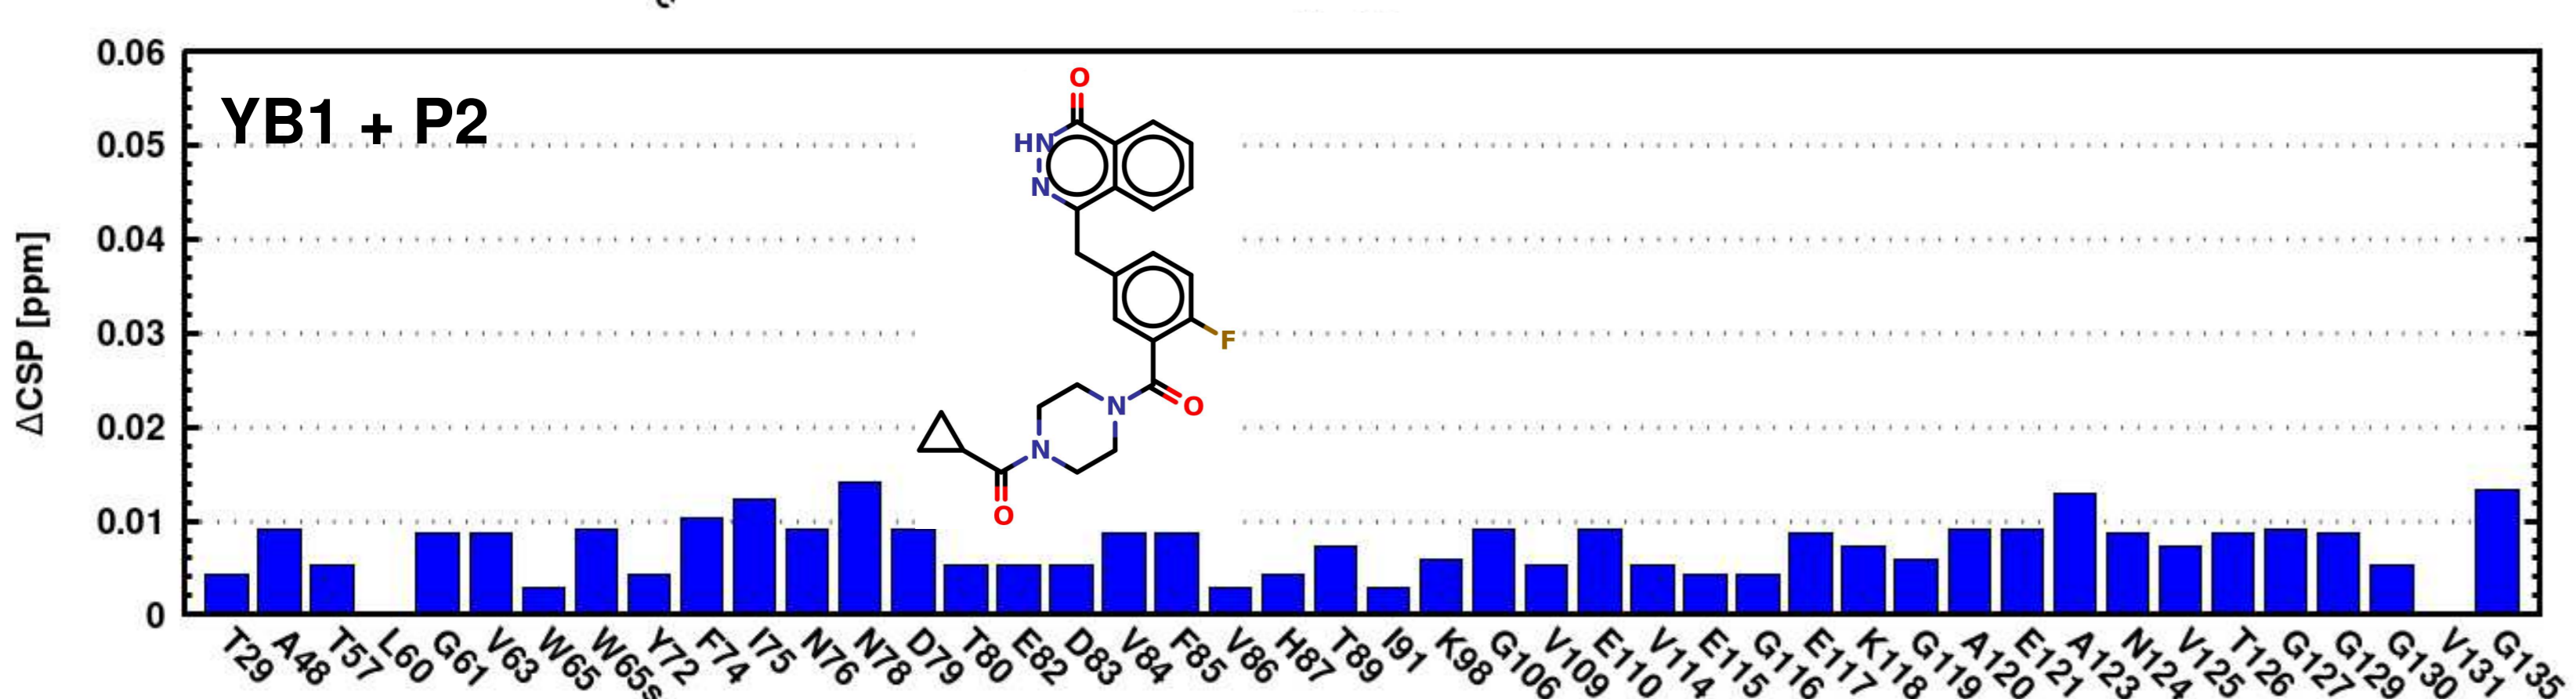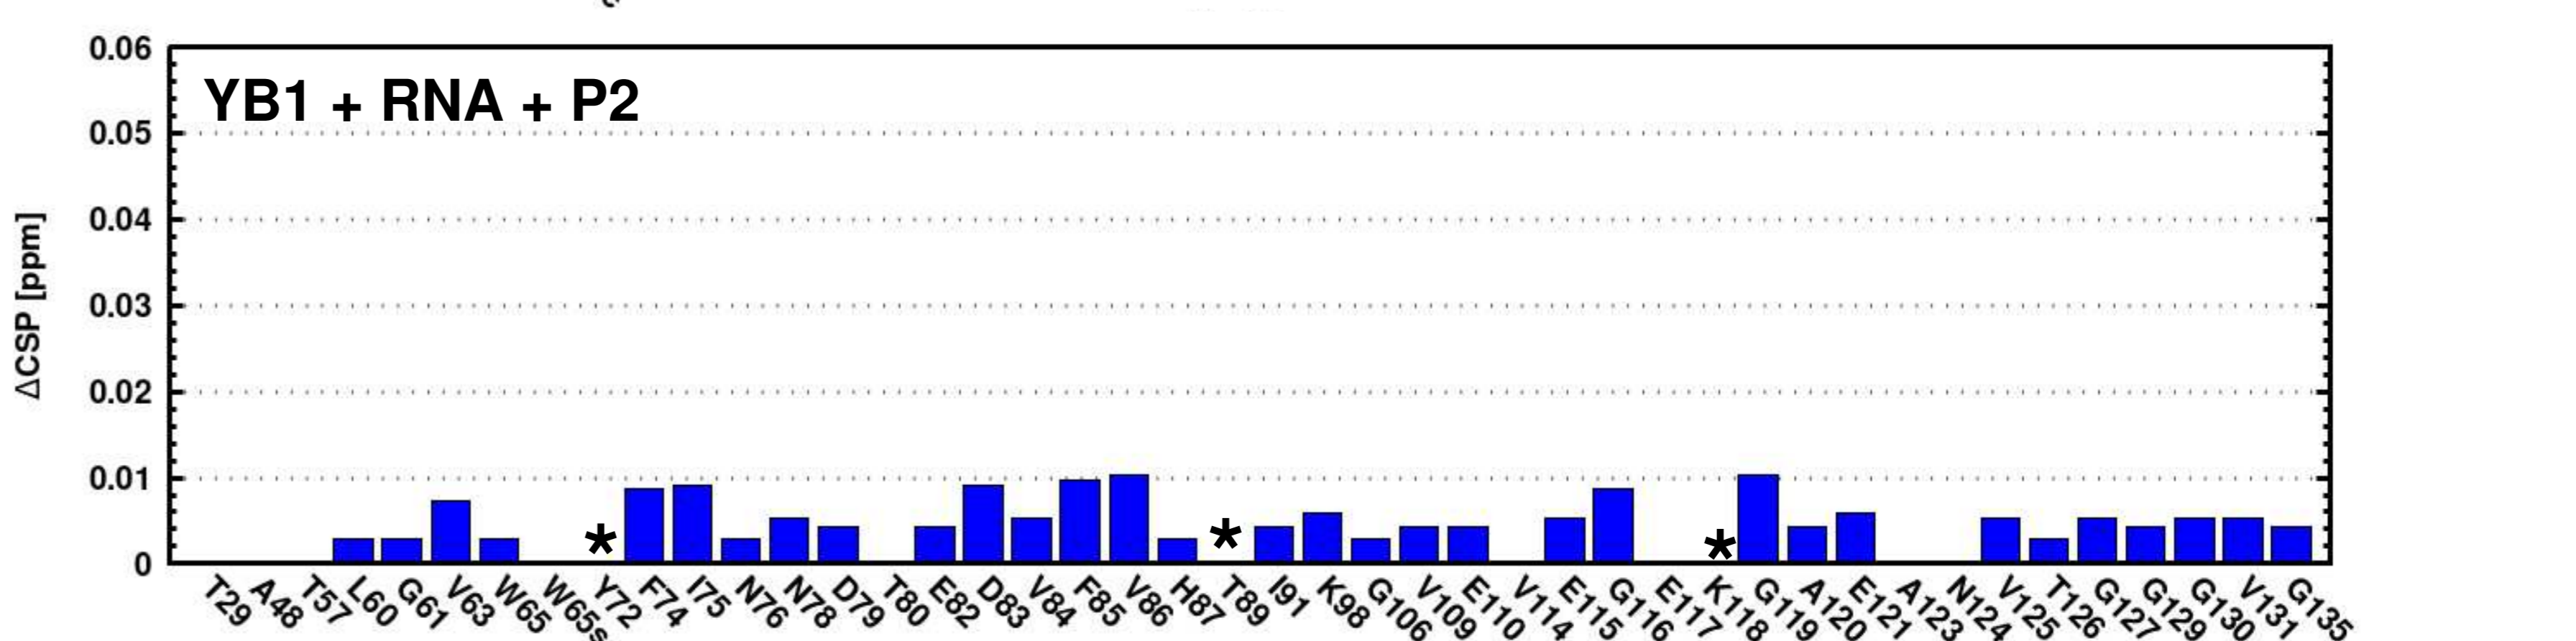

Supplement: supp [file elife-80387-supp-v1.zip › elife_poa_e80387_Figure_7_figure_supplement_1.pdf]

a

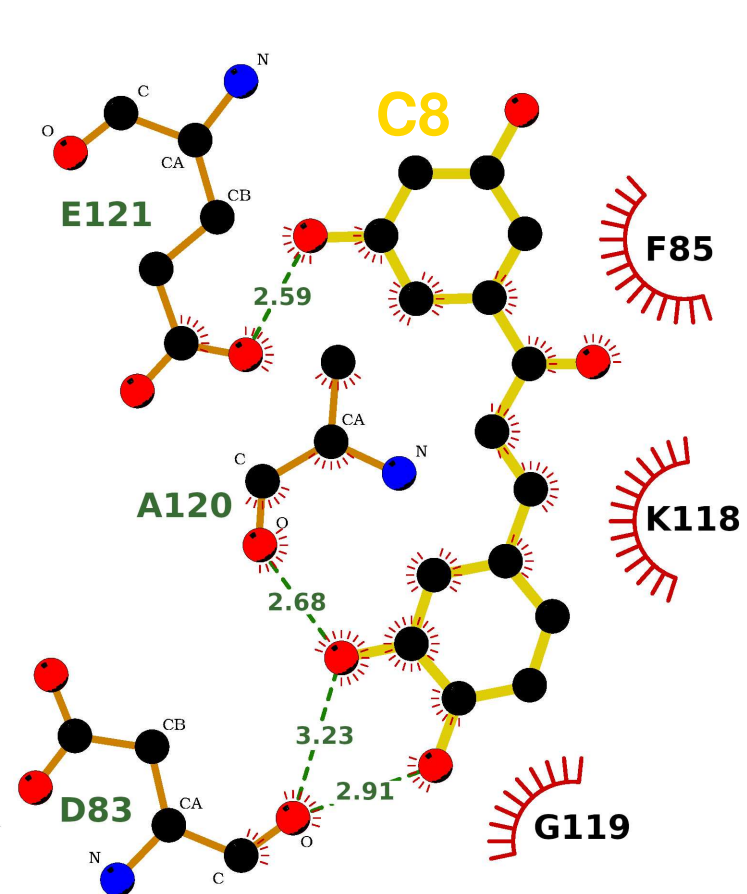

b

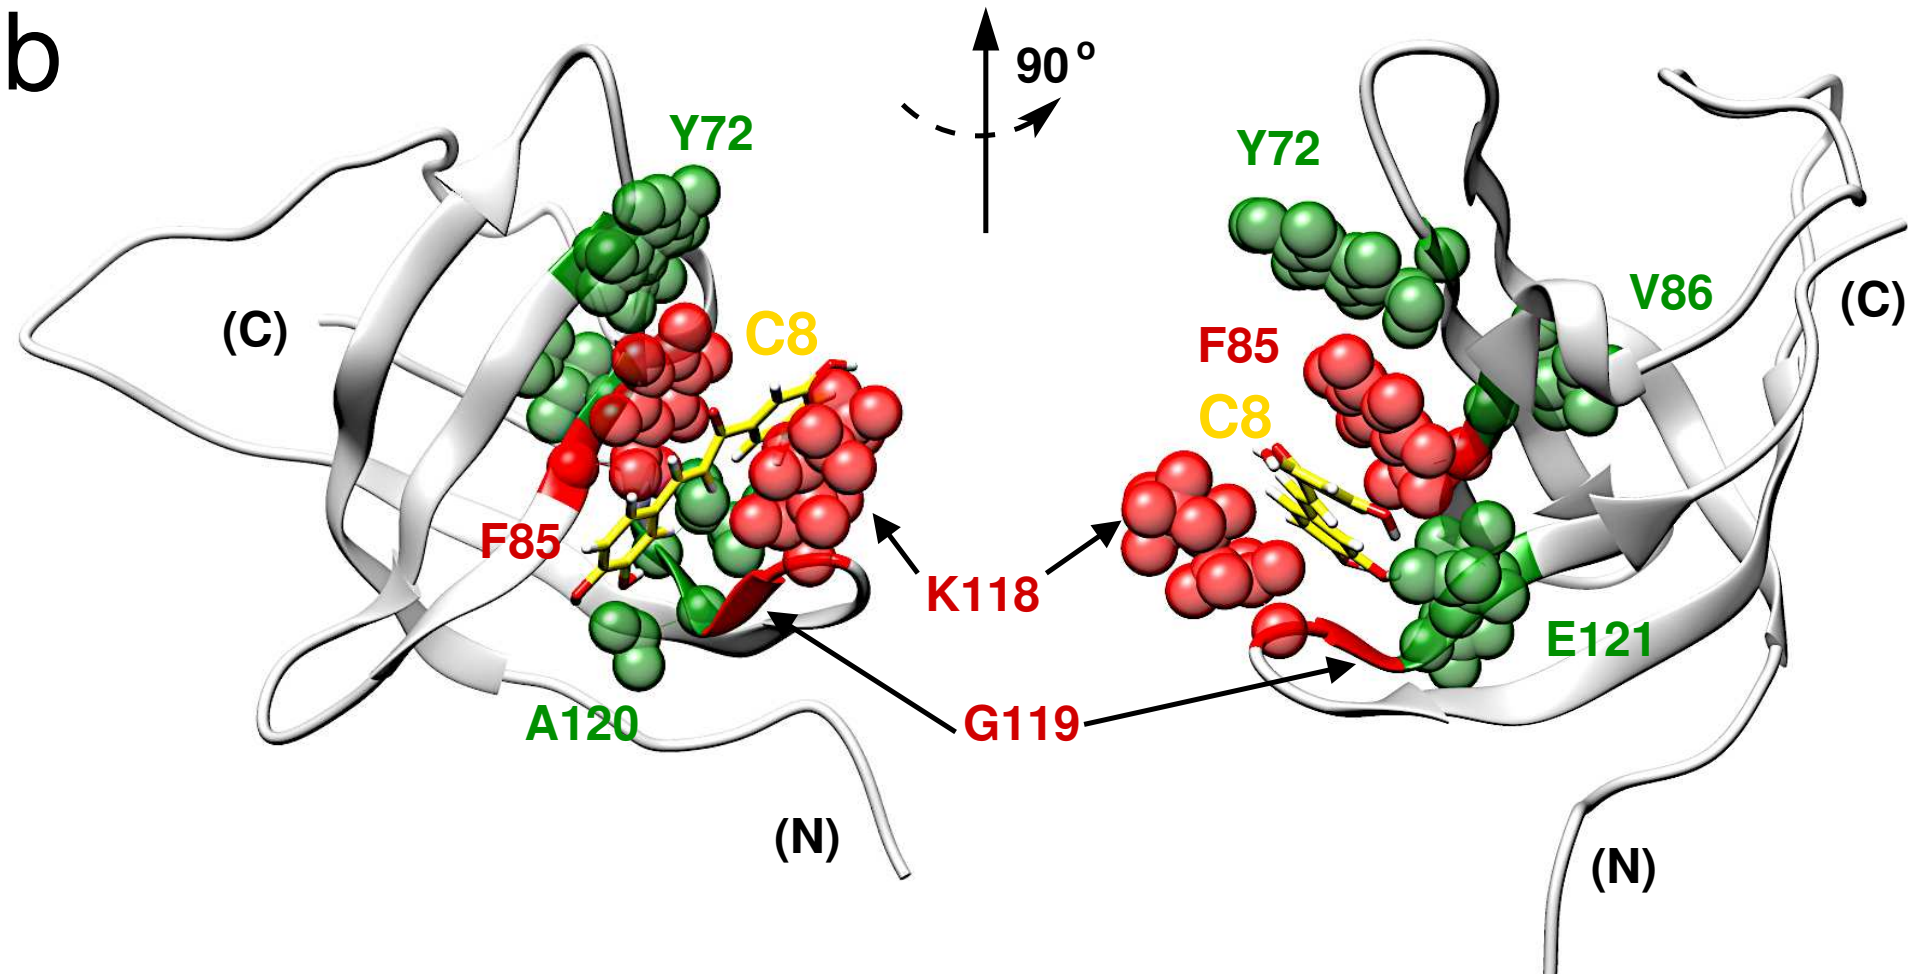

c

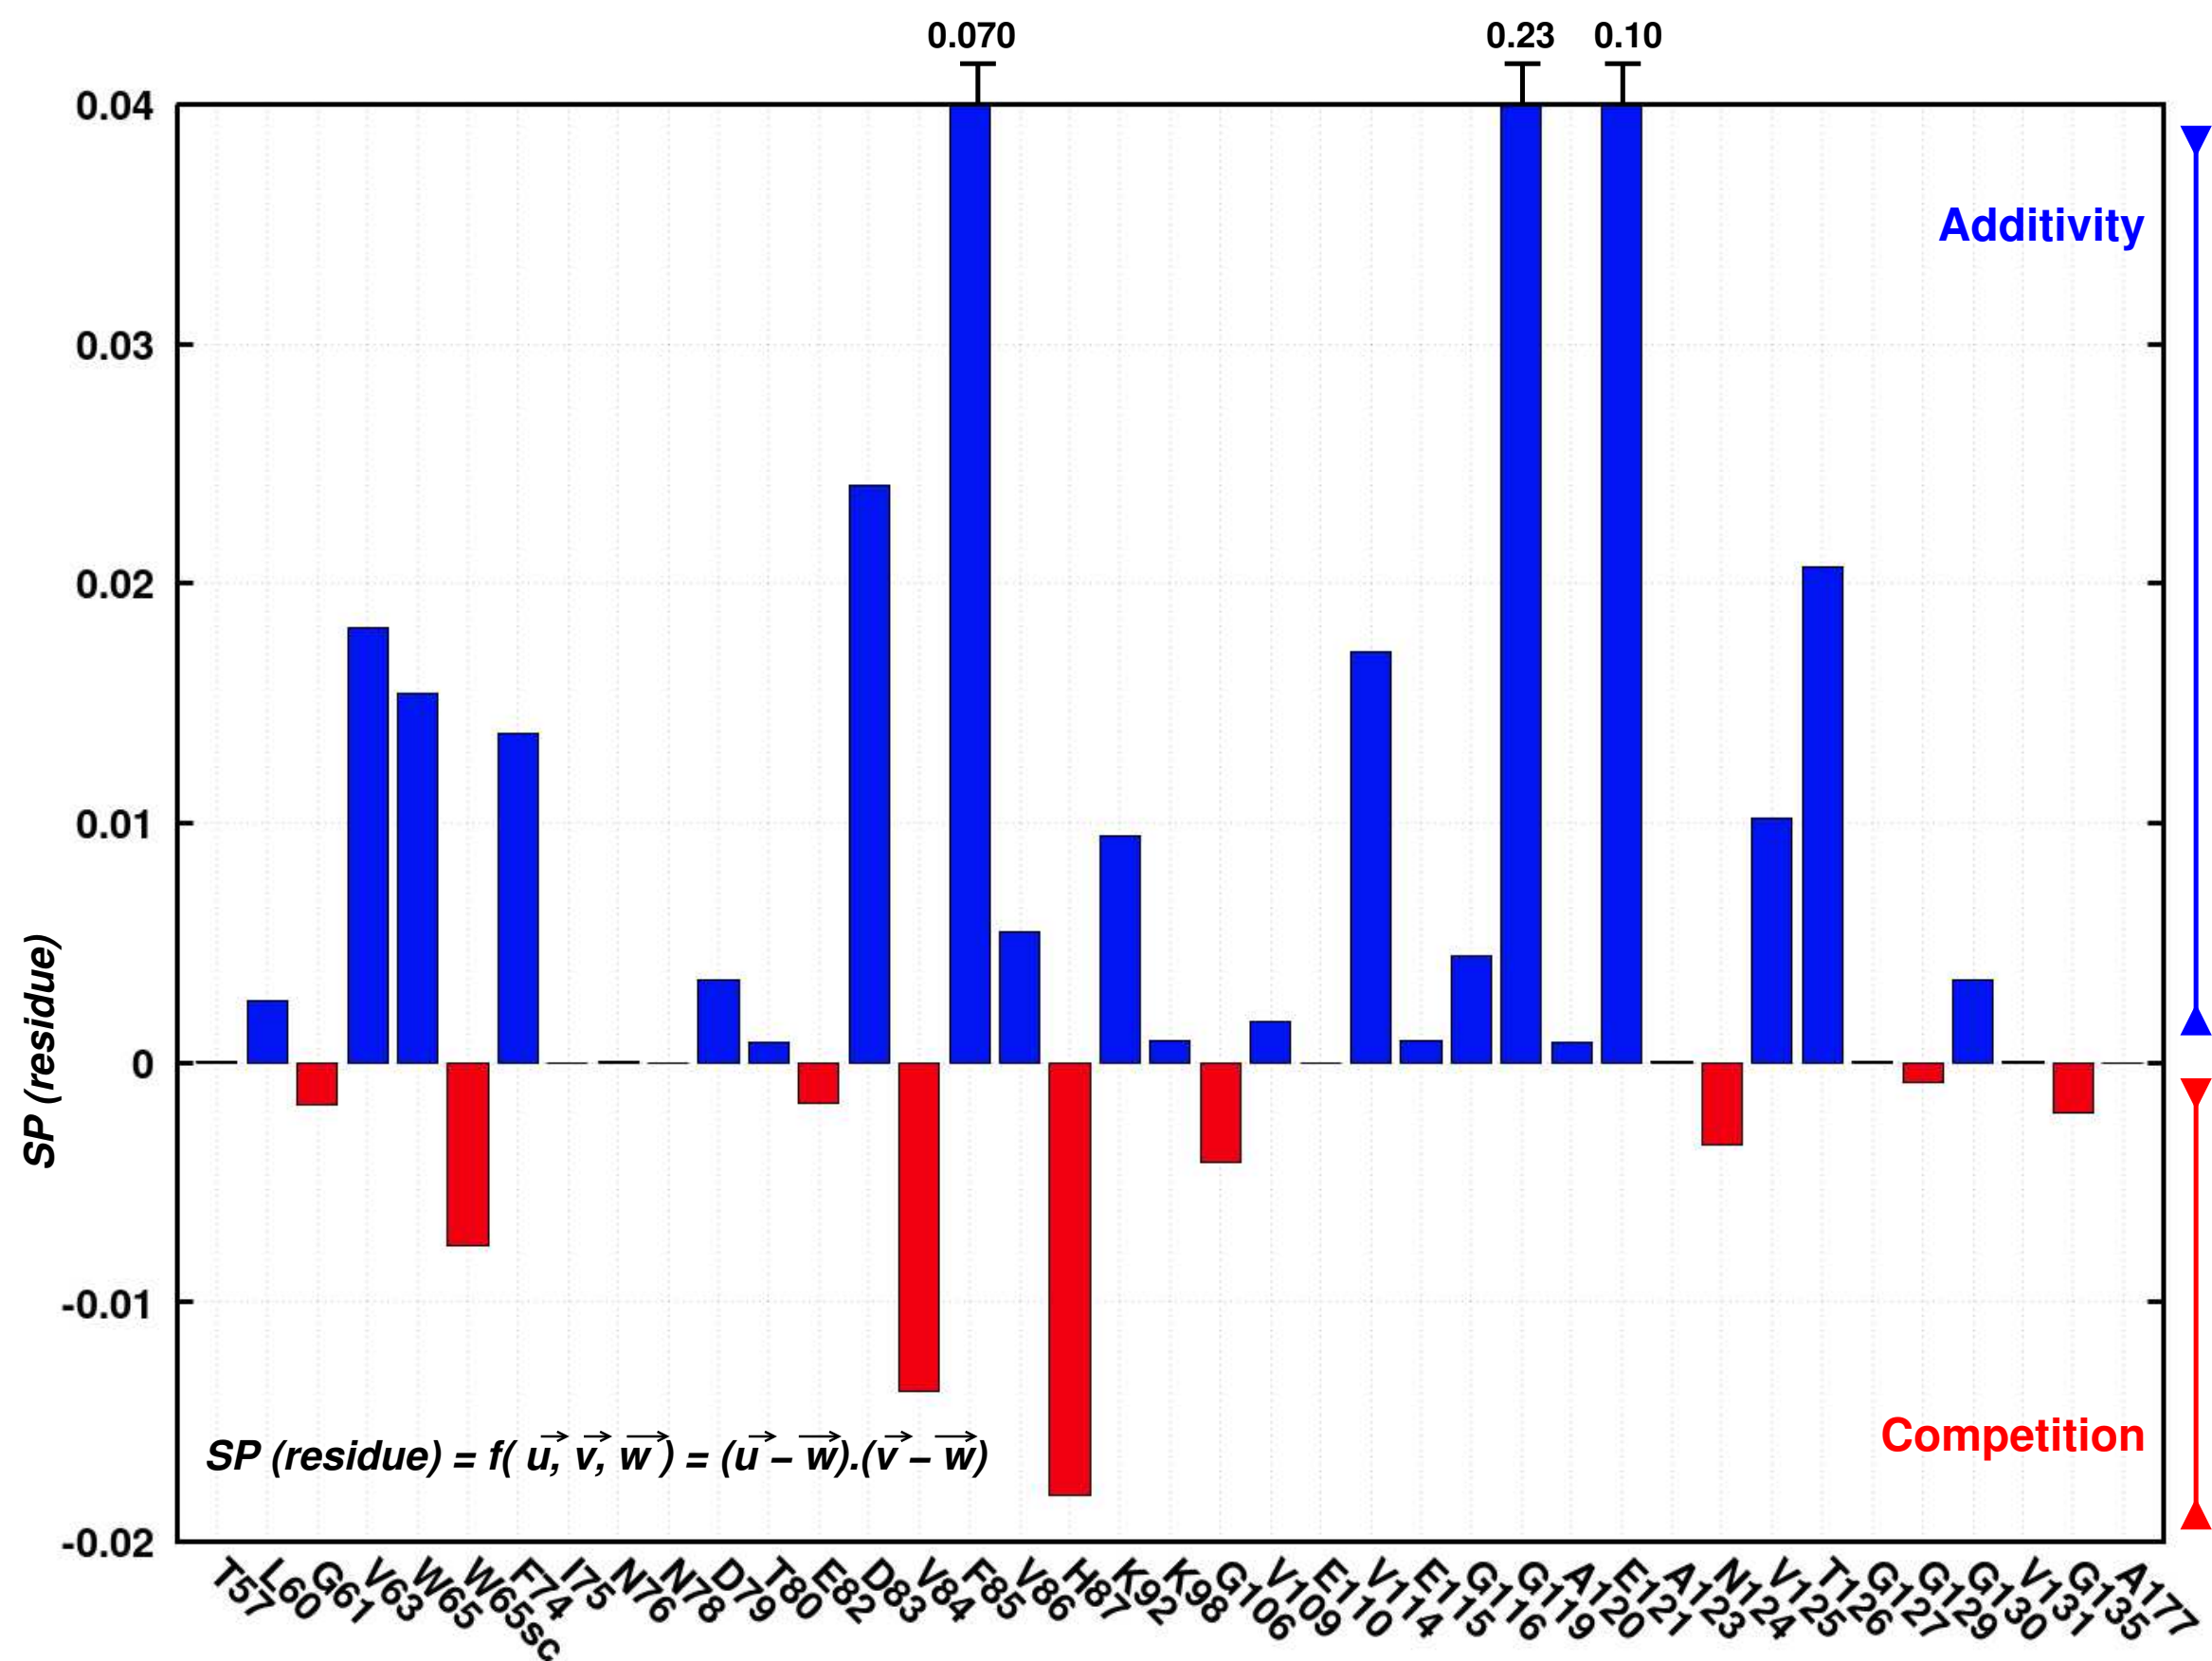

Supplement: supp [file elife-80387-supp-v1.zip › elife_poa_e80387_Figure_7_figure_supplement_2.pdf]

**a**

Control

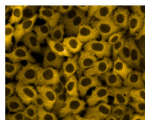

Cycloheximide

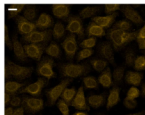

Anti-puromycin

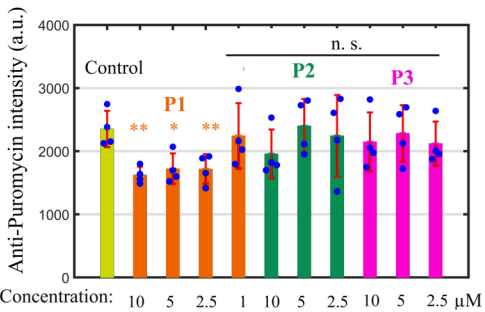**b**

DMSO

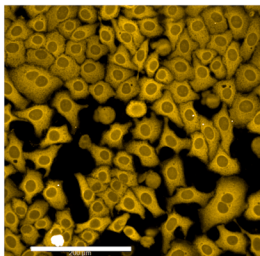

P1

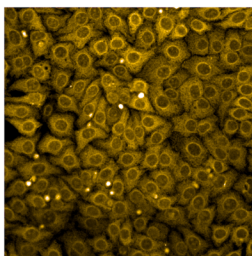

P2

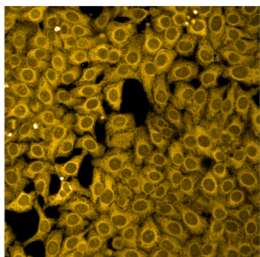

P3

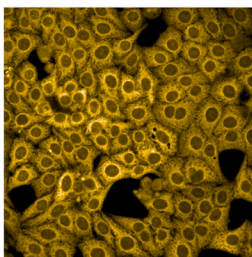

Anti-puromycin

Supplement: supp [file elife-80387-supp-v1.zip › elife_poa_e80387_Figure_8_figure_supplement_2.pdf]
